# Supplementary material for: [Cp*RhCl2]2catalyzed three-component coupling cyclization of 2,3-allenoic acids with 2,3-allenols in the presence of Cu(OAc)2·H2O
Source: Royal Society of Chemistry journal article supplement (doi:10.1039/d3qo00608e), 2023-01-01
Supplement: d3qo00608e1.pdf [file d3qo00608e1.pdf]

**[Cp\*RhCl<sub>2</sub>]<sub>2</sub> Catalyzed Three-Component Coupling Cyclization of 2,3-Allenic  
Acids with 2,3-Allenols in the Presence of Cu(OAc)<sub>2</sub>·H<sub>2</sub>O**

Junjie Fan, Xiaoyan Wu, Chunling Fu and Shengming Ma\*

*Laboratory of Molecular Recognition and Synthesis, Department of Chemistry,  
Zhejiang University, Hangzhou 310027, Zhejiang, P. R. China.*

E-mail: [masm@sioc.ac.cn](mailto:masm@sioc.ac.cn)

Supporting Information

Table of Contents

|                                                                                                                                                                     |         |
|---------------------------------------------------------------------------------------------------------------------------------------------------------------------|---------|
| General Information                                                                                                                                                 | S2      |
| 1. The Reaction of <b>1a</b> with <b>3a</b> in the Presence of [Cp*RhCl <sub>2</sub> ] <sub>2</sub> (5 mol%) and Cu(OAc) <sub>2</sub> ·H <sub>2</sub> O (2.0 equiv) | S3-S5   |
| 2. The Reaction of ( <i>E</i> )- <b>4aa</b> in the Presence of [Cp*RhCl <sub>2</sub> ] <sub>2</sub> (5 mol%) and Cu(OAc) <sub>2</sub> ·H <sub>2</sub> O (2.0 equiv) | S6      |
| 3. Control Experiments and Isotopic Labeling Experiments                                                                                                            | S7-S12  |
| 4. Rh(III)-Catalyzed Oxidative Cross-coupling Cyclization of 2,3-Allenic Acids and 2,3-Allenols                                                                     | S13-S30 |
| 5. A Gram Scale Reaction                                                                                                                                            | S32     |
| 6. Synthetic Applications                                                                                                                                           | S33-S38 |
| 7. References                                                                                                                                                       | S39     |
| 8. <sup>1</sup> H NMR, <sup>13</sup> C NMR, and <sup>19</sup> F NMR Spectra of the Compounds                                                                        | S40     |

## General Information

NMR spectra were taken with the 600 MHz, 400 MHz, or 300 MHz Bruker Advance spectrometer (600 MHz, 400 MHz, or 300 MHz for  $^1\text{H}$  NMR, 100 MHz or 75 MHz for  $^{13}\text{C}$  NMR, and 282 MHz for  $^{19}\text{F}$  NMR) in  $\text{CDCl}_3$ . All  $^1\text{H}$  NMR experiments were measured with tetramethylsilane (0 ppm) in  $\text{CDCl}_3$  as the internal reference;  $^{13}\text{C}$  NMR experiments were measured in relative to the signal of  $\text{CDCl}_3$  (77.0 ppm).  $^{19}\text{F}$  NMR experiments were measured in relative to the signal of  $\text{CFCl}_3$  (0 ppm) in  $\text{CDCl}_3$  as the internal reference. IR spectra were recorded with a Perkin–Elmer 983G instrument. Elemental analyses were conducted with a Carlo-Erba EA1110 elementary analysis instrument. Mass spectrometry was performed with an HP 5989A system. High-resolution mass spectrometry was determined with a Finnigan MAT 8430 or Bruker APEXIII instrument.  $[\text{Cp}^*\text{RhCl}_2]_2$  was purchased from *HWRK CHEM*. The range of boiling point of petroleum ether used for chromatography was 60~90 °C unless noted otherwise. Flash column chromatography was performed on silica gel H unless noted otherwise. 2,3-Allenols,<sup>1</sup> 2,3-allenoic acids,<sup>2</sup> and (*E*)-**4aa**<sup>3</sup> were prepared according to the literature procedures. Other commercially available reagents were purchased and used as received.

**1. The Reaction of 1a with 3a in the Presence of [Cp\*RhCl<sub>2</sub>]<sub>2</sub> (5 mol%) and Cu(OAc)<sub>2</sub>·H<sub>2</sub>O (2.0 equiv) (fjj-1-028)**

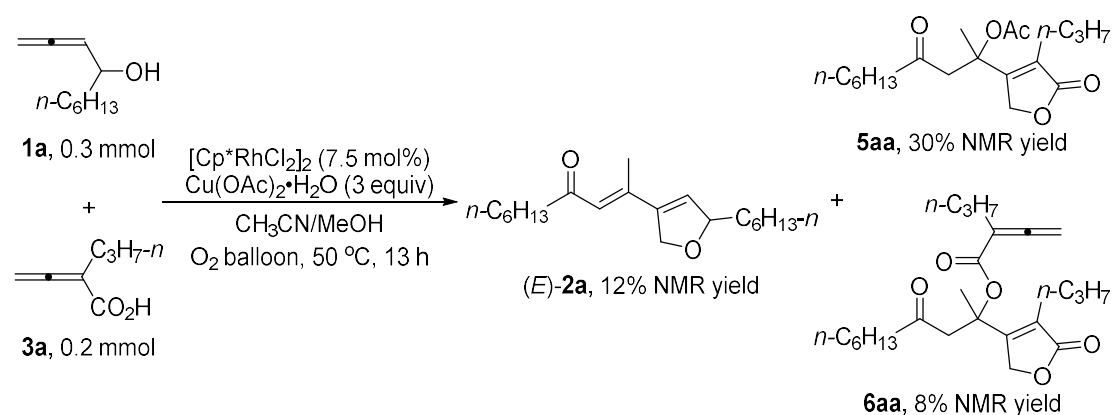

To a dry Schlenk tube were added [Cp\*RhCl<sub>2</sub>]<sub>2</sub> (9.5 mg, 0.015 mmol), Cu(OAc)<sub>2</sub>·H<sub>2</sub>O (120.4 mg, 0.6 mmol), and **3a** (25.6 mg, 0.2 mmol) sequentially. The Schlenk tube was degassed under vacuum and backfilled with O<sub>2</sub> with a balloon of O<sub>2</sub> for three times. Then **1a** (46.8 mg, 0.3 mmol), CH<sub>3</sub>CN (0.6 mL), and MeOH (30 μL) were added under oxygen atmosphere sequentially. After being stirred for 13 h at 50 °C, the resulting mixture was filtered through a short column of silica gel eluted with ethyl acetate (20 mL × 3). After evaporation of the solvent, the crude product was analyzed by <sup>1</sup>H NMR spectrum with 13.8 μL of mesitylene as the internal standard: The reaction afforded (*E*)-**2a** in 12% NMR yield (based on **1a**) together with **5aa** in 30% NMR yield and **6aa** in 8% NMR yield.

Synthesis of **6aa**. (fjj-2-103)

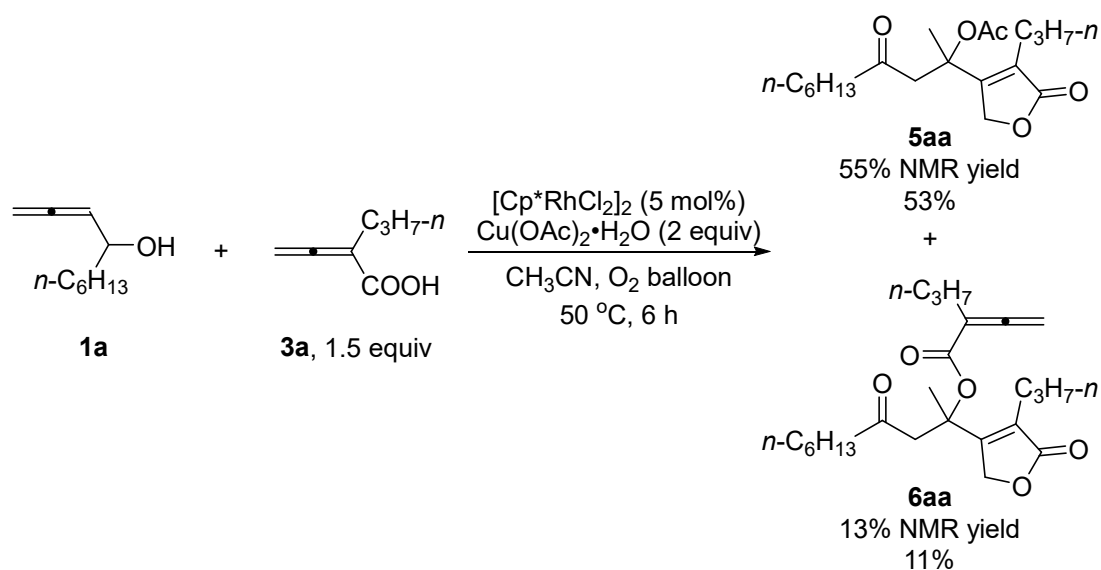

To a dry Schlenk tube were added  $[\text{Cp}^*\text{RhCl}_2]_2$  (15.7 mg, 0.025 mmol),  $\text{Cu}(\text{OAc})_2 \cdot \text{H}_2\text{O}$  (199.5 mg, 1.0 mmol), and **3a** (94.8 mg, 0.75 mmol) sequentially. The Schlenk tube was degassed under vacuum and backfilled with  $\text{O}_2$  with a balloon of  $\text{O}_2$  for three times. Then **1a** (76.5 mg, 0.5 mmol),  $\text{CH}_3\text{CN}$  (2 mL), and  $\text{MeOH}$  (100  $\mu\text{L}$ ) were added under oxygen atmosphere sequentially. After being continuously stirred at  $50^\circ\text{C}$  for 6 h, the reaction was complete as monitored by thin layer chromatography (TLC). After filtration through a short column of silica gel eluted with ethyl acetate (20 mL  $\times$  3), the combined filtrate was concentrated in vacuo. The reaction afforded **5aa** in 53% NMR yield together with 13% NMR yield of **6aa**, which was analyzed by  $^1\text{H}$  NMR using 23  $\mu\text{L}$  of mesitylene as the internal standard. The crude residual was purified by chromatography on silica gel [eluent: petroleum ether/ethyl acetate = 15/1 (1000 mL) to 10/1 (500 mL), then 5/1 (500 mL)] to afford **6aa** (21.0 mg, 11%) and **5aa** (89.4 mg, 53%).

**6aa**: Oil;  $^1\text{H}$  NMR (300 MHz,  $\text{CDCl}_3$ )  $\delta$  5.15 (t,  $J = 3.0$  Hz, 2 H,  $=\text{CH}_2$ ), 5.07 (d,  $J$

= 14.7 Hz, 1 H, one proton of OCH<sub>2</sub>), 4.99 (d,  $J$  = 14.4 Hz, 1 H, one proton of OCH<sub>2</sub>), 3.06 (d,  $J$  = 14.7 Hz, 1 H, one proton of CH<sub>2</sub>), 2.75 (d,  $J$  = 14.7 Hz, 1 H, one proton of CH<sub>2</sub>), 2.43 (t,  $J$  = 7.2 Hz, 2 H, CH<sub>2</sub>), 2.34-2.14 (m, 4 H, CH<sub>2</sub> × 2), 1.62-1.41 (m, 9 H, CH<sub>2</sub> × 3 and CH<sub>3</sub>), 1.34-1.16 (m, 6 H, CH<sub>2</sub> × 3), 0.98-0.82 (m, 9 H, CH<sub>3</sub> × 3); <sup>13</sup>C NMR (75 MHz, CDCl<sub>3</sub>) δ 214.4, 206.7, 171.8, 166.7, 158.2, 130.6, 99.5, 85.2, 79.3, 58.4, 48.7, 44.8, 31.5, 29.9, 28.6, 25.6, 25.2, 23.1, 22.4, 21.3, 21.1, 14.0, 13.7, 13.5; IR (neat)  $\nu$  (cm<sup>-1</sup>) 2960, 2933, 2873, 1964, 1940, 1760, 1716, 1457, 1378, 1246, 1119, 1051; MS (EI):  $m/z$  (%) 404 (M<sup>+</sup>, 0.38), 279 (100); HRMS Calcd for C<sub>24</sub>H<sub>36</sub>O<sub>5</sub> (M<sup>+</sup>): 404.2563; Found: 404.2565.

**5aa:** Oil; <sup>1</sup>H NMR (300 MHz, CDCl<sub>3</sub>) δ 4.95 (s, 2 H, CH<sub>2</sub>), 3.07 (d,  $J$  = 14.7 Hz, 1 H, one proton from CH<sub>2</sub>), 2.75 (d,  $J$  = 14.7 Hz, 1 H, one proton from CH<sub>2</sub>), 2.44 (t,  $J$  = 7.2 Hz, 2 H, CH<sub>2</sub>), 2.30 (t,  $J$  = 7.4 Hz, 2 H, CH<sub>2</sub>), 2.10 (s, 3 H, CH<sub>3</sub>), 1.62-1.32 (m, 7 H, CH<sub>2</sub> × 2 and CH<sub>3</sub>), 1.36-1.13 (m, 6 H, CH<sub>2</sub> × 3), 0.94 (t,  $J$  = 7.4 Hz, 3 H, CH<sub>3</sub>), 0.87 (t,  $J$  = 6.2 Hz, 3 H, CH<sub>3</sub>);

**2. The Reaction of (*E*)-4aa in the Presence of [Cp\*RhCl<sub>2</sub>]<sub>2</sub> (5 mol%) and Cu(OAc)<sub>2</sub>·H<sub>2</sub>O (2.0 equiv) (fjj-2-042)**

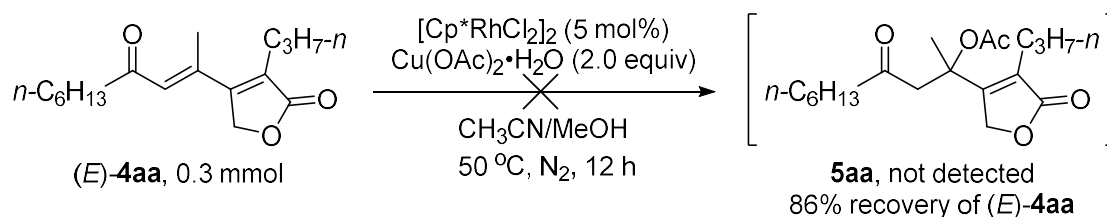

To a dry Schlenk tube were added [Cp\*RhCl<sub>2</sub>]<sub>2</sub> (9.2 mg, 0.015 mmol) and Cu(OAc)<sub>2</sub>·H<sub>2</sub>O (119.0 mg, 0.6 mmol) sequentially. The Schlenk tube was degassed under vacuum and backfilled with nitrogen for three times. Then (*E*)-4aa (83.0 mg, 0.3 mmol), CH<sub>3</sub>CN (0.8 mL), and MeOH (40 μL) were added under nitrogen atmosphere sequentially. After being stirred for 12 h at 50 °C, the resulting mixture was filtered through a short column of silica gel eluted with ethyl acetate (20 mL × 3). After evaporation of the solvent, the crude product was analyzed by <sup>1</sup>H NMR spectrum with 13.8 μL of mesitylene as the internal standard. No signal of the corresponding product was found with the recovery of (*E*)-4aa in 86%.

### 3. Control Experiments and Isotopic Labeling Experiments

#### 3.1 The reaction of **1a** with **3a** without $[\text{Cp}^*\text{RhCl}_2]_2$ . (fjj-2-026)

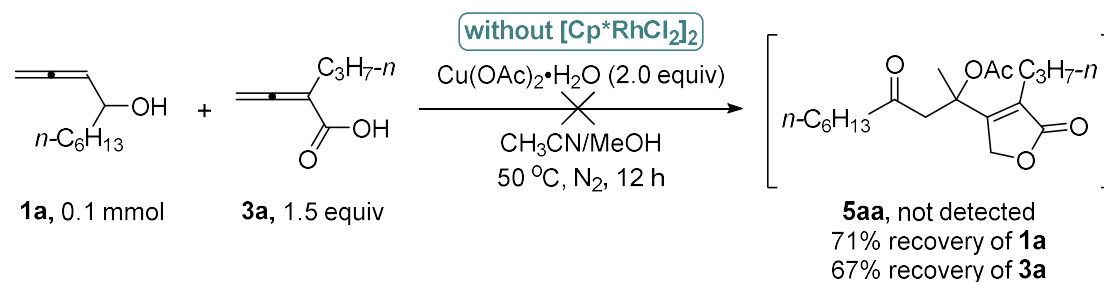

To a dry Schlenk tube were added  $\text{Cu}(\text{OAc})_2 \cdot \text{H}_2\text{O}$  (39.9 mg, 0.2 mmol) and **3a** (19.4 mg, 0.15 mmol) sequentially. The Schlenk tube was degassed under vacuum and backfilled with nitrogen for three times. Then **1a** (15.0 mg, 0.1 mmol),  $\text{CH}_3\text{CN}$  (0.28 mL), and  $\text{MeOH}$  (13  $\mu\text{L}$ ) were added under nitrogen atmosphere sequentially. After being stirred for 12 h at 50 °C, the resulting mixture was filtered through a short column of silica gel eluted with ethyl acetate (20 mL  $\times$  3). After evaporation of the solvent, the crude product was analyzed by  $^1\text{H}$  NMR spectrum with 4.6  $\mu\text{L}$  of mesitylene as the internal standard. No signal of the corresponding product **5aa** was found with the recovery of **1a** at 71% and **3a** at 67%.

#### 3.2 The reaction of **1a** with **3a** using $\text{O}_2$ as oxidant and $\text{NaOAc}$ as the acetoxylation agent. (fjj-7-194)

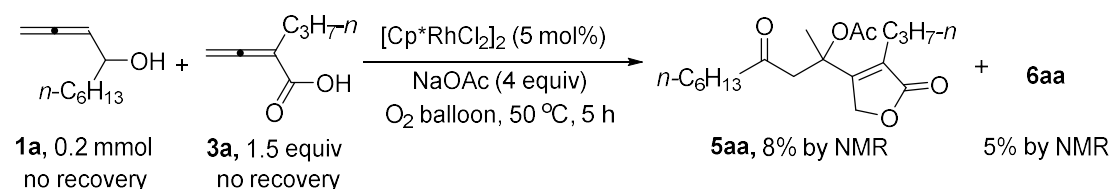

To a dry Schlenk tube were added  $[\text{Cp}^*\text{RhCl}_2]_2$  (6.2 mg, 0.01 mmol),  $\text{NaOAc}$  (65.8

mg, 0.8 mmol), and **3a** (38.0 mg, 0.3 mmol) sequentially. The Schlenk tube was degassed under vacuum and backfilled with O<sub>2</sub> for three times. Then **1a** (30.9 mg, 0.2 mmol), CH<sub>3</sub>CN (0.54 mL), and MeOH (26 μL) were added under O<sub>2</sub> atmosphere sequentially. After being stirred for 5 h at 50 °C, the resulting mixture was filtered through a short column of silica gel eluted with ethyl acetate (10 mL × 3). After evaporation of the solvent, the crude product was analyzed by <sup>1</sup>H NMR spectrum with 9.2 μL of mesitylene as the internal standard: 8% NMR yield of **5aa** and 5% NMR yield of **6aa** was detected.

3.3 The reaction of **1a** with **3a** using O<sub>2</sub> as oxidant and KOAc as the acetoxylation agent.

(fjj-7-195)

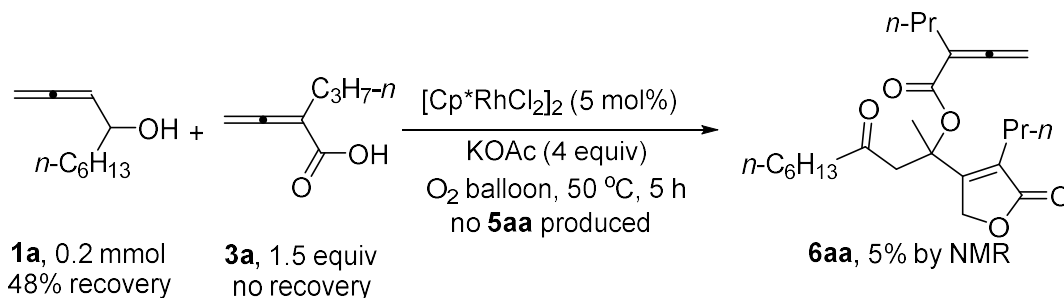

To a dry Schlenk tube were added [Cp<sup>\*</sup>RhCl<sub>2</sub>]<sub>2</sub> (6.2 mg, 0.01 mmol), KOAc (78.5 mg, 0.8 mmol), and **3a** (37.8 mg, 0.3 mmol) sequentially. The Schlenk tube was degassed under vacuum and backfilled with O<sub>2</sub> for three times. Then **1a** (30.9 mg, 0.2 mmol), CH<sub>3</sub>CN (0.54 mL), and MeOH (26 μL) were added under O<sub>2</sub> atmosphere sequentially. After being stirred for 5 h at 50 °C, the resulting mixture was filtered through a short column of silica gel eluted with ethyl acetate (10 mL × 3). After



evaporation of the solvent, the crude product was analyzed by  $^1\text{H}$  NMR spectrum with 9.2  $\mu\text{L}$  of mesitylene as the internal standard: No signal of **5aa** and 5% NMR yield of **6aa** was detected with the recovery of **1a** at 48%.

### 3.4 Synthesis of [D]-**5aa**. (fjj-1-085)

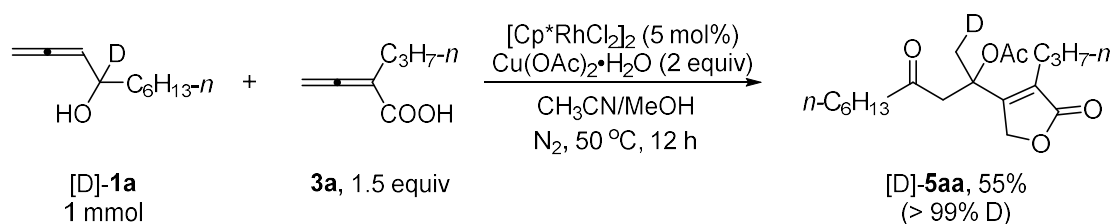

**Typical Procedure I:** To a dry Schlenk tube were added  $[\text{Cp}^*\text{RhCl}_2]_2$  (30.9 mg, 0.05 mmol),  $\text{Cu}(\text{OAc})_2\cdot\text{H}_2\text{O}$  (399.4 mg, 2.0 mmol), and **3a** (189.8 mg, 1.5 mmol). The reaction vessel was degassed under vacuum and backfilled with nitrogen for three times. Then **[D]-1a** (155.2 mg, 1.0 mmol),  $\text{CH}_3\text{CN}$  (2.7 mL), and MeOH (0.13 mL) were added under nitrogen atmosphere sequentially. After being continuously stirred at 50  $^\circ\text{C}$  for 12 h, the reaction was complete as monitored by thin layer chromatography (TLC). After filtration through a short column of silica gel eluted with ethyl acetate (20 mL  $\times$  3), the combined filtrate was concentrated in vacuo and the crude residual was purified by chromatography on silica gel [eluent: petroleum ether/ethyl acetate = 15/1 (500 mL) to 10/1 (500 mL), then 5/1 (500 mL)] to afford **[D]-5aa** (187.0 mg, 55%) as an oil:  $^1\text{H}$  NMR (300 MHz,  $\text{CDCl}_3$ )  $\delta$  4.95 (dd,  $J_1 = 14.6$  Hz,  $J_2 = 14.4$  Hz, 2 H,  $\text{OCH}_2$ ), 3.07 (d,  $J = 14.7$  Hz, 1 H, one proton of  $\text{CH}_2$ ), 2.74 (d,  $J = 14.7$  Hz, 1 H, one proton of  $\text{CH}_2$ ), 2.44 (t,  $J = 7.4$  Hz, 2 H,  $\text{CH}_2$ ), 2.31 (t,  $J = 7.7$  Hz, 2 H,  $\text{CH}_2$ ), 2.11 (s, 3 H, OAc),

1.63-1.36 (m, 6 H, CH<sub>2</sub> × 2 and CH<sub>2</sub>D), 1.36-1.12 (m, 6 H, CH<sub>2</sub> × 3), 0.94 (t, *J* = 7.4 Hz, 3 H, CH<sub>3</sub>), 0.87 (t, *J* = 6.8 Hz, 3 H, CH<sub>3</sub>); <sup>13</sup>C NMR (75 MHz, CDCl<sub>3</sub>) δ 206.5, 171.7, 169.9, 157.7, 131.1, 84.9, 57.4, 48.5, 44.6, 31.4, 28.5, 25.6, 24.9 (t, *J* = 19.3 Hz), 23.0, 22.3, 21.3, 20.5, 13.9, 13.6; IR (neat)  $\nu$  (cm<sup>-1</sup>) 2959, 2932, 2873, 1762, 1747, 1710, 1682, 1452, 1368, 1218, 1160, 1128, 1023; MS (EI): *m/z* (%) 339 (M<sup>+</sup>, 2.83), 43 (100); HRMS Calcd for C<sub>19</sub>H<sub>29</sub>DO<sub>5</sub> (M)<sup>+</sup>: 339.2156; Found: 339.2159.

### 3.5 Synthesis of [D]'-**5aa**. (fjj-5-071)

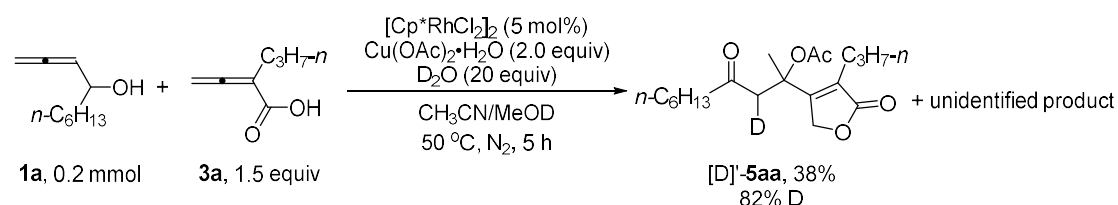

To a dry Schlenk tube were added [Cp<sup>\*</sup>RhCl<sub>2</sub>]<sub>2</sub> (6.2 mg, 0.01 mmol), Cu(OAc)<sub>2</sub>·H<sub>2</sub>O (80.2 mg, 0.4 mmol), and **3a** (38.0 mg, 0.3 mmol) sequentially. The reaction vessel was degassed under vacuum and backfilled with nitrogen for three times. Then **1a** (30.9 mg, 0.2 mmol), CH<sub>3</sub>CN (0.54 mL), MeOD (27 μL), and D<sub>2</sub>O (80 mg, 4 mmol) were added under nitrogen atmosphere sequentially. After being continuously stirred at 50 °C for 5 h, the reaction was complete as monitored by thin layer chromatography (TLC). After filtration through a short column of silica gel eluted with ethyl acetate (20 mL × 3), the combined filtrate was concentrated in vacuo and the crude residual was purified by chromatography on silica gel (300~400 mesh) [eluent: petroleum ether/ethyl acetate = 9/1 (600 mL)] to afford [D]'-**5aa** (26.0 mg, 38%, 82% D) and some unidentified products.

[D]'-**5aa**:  $^1\text{H}$  NMR (400 MHz,  $\text{CDCl}_3$ )  $\delta$  5.00-4.89 (m, 2 H,  $\text{OCH}_2$ ), [3.09-3.00 (m, 0.62 H), 2.77-2.68 (m, 0.56 H), one proton of  $\text{CHD}$ ], 2.44 (t,  $J = 7.4$  Hz, 2 H,  $\text{CH}_2$ ), 2.30 (t,  $J = 7.6$  Hz, 2 H,  $\text{CH}_2$ ), 2.10 (s, 3 H,  $\text{OAc}$ ), 1.63-1.42 (m, 7 H,  $\text{CH}_3$ , and  $\text{CH}_2 \times 2$ ), 1.37-1.13 (m, 6 H,  $\text{CH}_2 \times 3$ ), 0.94 (t,  $J = 7.4$  Hz, 3 H,  $\text{CH}_3$ ), 0.87 (t,  $J = 6.8$  Hz, 3 H,  $\text{CH}_3$ );  $^{13}\text{C}$  NMR (100 MHz,  $\text{CDCl}_3$ )  $\delta$  48.4 (t,  $J = 19.4$  Hz); IR (neat)  $\nu$  ( $\text{cm}^{-1}$ ) 2960, 2933, 2873, 1755, 1716, 1456, 1368, 1221, 1029; MS (EI):  $m/z$  (%) 339 ( $\text{M}^+$ , 4.96), 43 (100); HRMS Calcd for  $\text{C}_{19}\text{H}_{29}\text{DNaO}_5$  ( $\text{M} + \text{Na}$ ) $^+$ : 362.2048; Found: 362.2046. The following signals are discernible for **5aa**:  $^{13}\text{C}$  NMR (100 MHz,  $\text{CDCl}_3$ )  $\delta$  48.7.

3.6 The reaction of **1a** and **3a** under standard conditions quenched with  $\text{D}_2\text{O}$  (fjj-5-073)

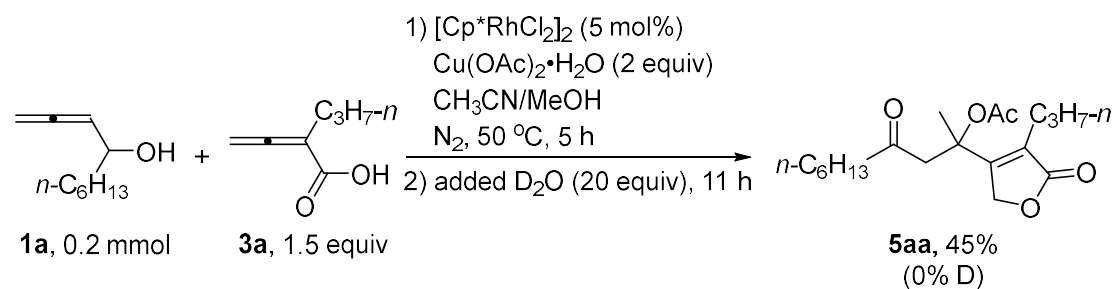

To a dry Schlenk tube were added  $[\text{Cp}^*\text{RhCl}_2]_2$  (6.2 mg, 0.01 mmol),  $\text{Cu}(\text{OAc})_2 \cdot \text{H}_2\text{O}$  (79.8 mg, 0.4 mmol), and **3a** (37.8 mg, 0.3 mmol). The reaction vessel was degassed under vacuum and backfilled with nitrogen for three times. Then **1a** (30.9 mg, 0.2 mmol),  $\text{CH}_3\text{CN}$  (0.54 mL), and  $\text{MeOH}$  (28  $\mu\text{L}$ ) were added under nitrogen atmosphere sequentially. After being continuously stirred at 50 °C for 5 h, the reaction was complete as monitored by thin layer chromatography (TLC). Then  $\text{D}_2\text{O}$  (80 mg, 4 mmol) was added. The resulting mixture was continuously stirred at 50 °C for 11 h.

After filtration through a short column of silica gel eluted with ethyl ether (20 mL  $\times$  3), the combined filtrate was concentrated in vacuo and the crude residual was purified by chromatography on silica gel [eluent: petroleum ether/ethyl acetate = 9/1 (500 mL)] to afford **5aa** (30.6 mg, 45%) as an oil:  $^1\text{H}$  NMR (300 MHz,  $\text{CDCl}_3$ )  $\delta$  4.94 (s, 2 H,  $\text{OCH}_2$ ), 3.05 (d,  $J = 14.7$  Hz, 1 H, one proton of  $\text{CH}_2$ ), 2.73 (d,  $J = 14.7$  Hz, 1 H, one proton of  $\text{CH}_2$ ), 2.44 (t,  $J = 7.2$  Hz, 2 H,  $\text{CH}_2$ ), 2.30 (t,  $J = 7.5$  Hz, 2 H,  $\text{CH}_2$ ), 2.10 (s, 3 H,  $\text{OAc}$ ), 1.63-1.40 (m, 7 H,  $\text{CH}_2 \times 2$  and  $\text{CH}_3$ ), 1.38-1.13 (m, 6 H,  $\text{CH}_2 \times 3$ ), 0.94 (t,  $J = 7.4$  Hz, 3 H,  $\text{CH}_3$ ), 0.87 (t,  $J = 6.6$  Hz, 3 H,  $\text{CH}_3$ ).

## 4. Rh(III)-Catalyzed Oxidative Cross-coupling Cyclization of 2,3- Allenic Acids and 2,3-Allenols

### 4.1 Synthesis of 4-(2-acetoxy-4-oxodecan-2-yl)-3-propyl-2(5*H*)-furanone **5aa** (fjj-1-052)

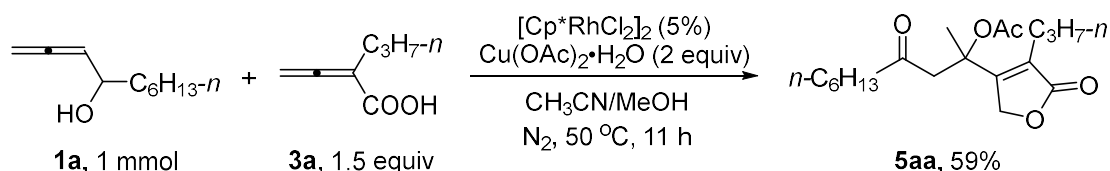

Following **Typical Procedure I**, the reaction of **1a** (152.8 mg, 1.0 mmol), **3a** (189.2 mg, 1.5 mmol),  $[\text{Cp}^*\text{RhCl}_2]_2$  (31.0 mg, 0.05 mmol), and  $\text{Cu}(\text{OAc})_2 \cdot \text{H}_2\text{O}$  (399.9 mg, 2.0 mmol) in  $\text{CH}_3\text{CN}$  (2.7 mL)/ $\text{MeOH}$  (0.13 mL) afforded **5aa** (197.1 mg, 59%) as an oil [eluent: petroleum ether/ethyl acetate = 50/1 (300 mL)  $\rightarrow$  15/1 (800 mL)  $\rightarrow$  10/1 (500 mL)  $\rightarrow$  5/1 (500 mL)]:  $^1\text{H}$  NMR (300 MHz,  $\text{CDCl}_3$ )  $\delta$  4.95 (dd,  $J_1 = 14.7$  Hz,  $J_2 = 14.4$  Hz, 2 H,  $\text{OCH}_2$ ), 3.06 (d,  $J = 15.0$  Hz, 1 H, one proton from  $\text{CH}_2$ ), 2.74 (d,  $J = 14.7$  Hz, 1 H, one proton from  $\text{CH}_2$ ), 2.44 (t,  $J = 7.2$  Hz, 2 H,  $\text{CH}_2$ ), 2.31 (t,  $J = 7.5$  Hz, 2 H,  $\text{CH}_2$ ), 2.10 (s, 3 H,  $\text{CH}_3$ ), 1.61-1.43 (m, 7 H,  $\text{CH}_2 \times 2$  and  $\text{CH}_3$ ), 1.35-1.18 (m, 6 H,  $\text{CH}_2 \times 3$ ), 0.94 (t,  $J = 7.4$  Hz, 3 H,  $\text{CH}_3$ ), 0.87 (t,  $J = 6.8$  Hz, 3 H,  $\text{CH}_3$ );  $^{13}\text{C}$  NMR (75 MHz,  $\text{CDCl}_3$ )  $\delta$  206.5, 171.7, 169.9, 157.7, 131.2, 85.0, 57.4, 48.6, 44.6, 31.4, 28.6, 25.7, 25.2, 23.1, 22.3, 21.3, 20.6, 13.9, 13.7; IR (neat)  $\nu$  ( $\text{cm}^{-1}$ ) 2960, 2933, 2873, 1748, 1712, 1678, 1456, 1406, 1368, 1221, 1135, 1030; MS (EI):  $m/z$  (%) 338 ( $\text{M}^+$ , 1.86), 43 (100); HRMS Calcd for  $\text{C}_{19}\text{H}_{30}\text{O}_5\text{Na}$  ( $\text{M}+\text{Na}$ ) $^+$ : 361.1985; Found: 361.1985.

### 4.2 Synthesis of 4-(2-acetoxy-4-oxodecan-2-yl)-3-butyl-2(5*H*)-furanone **5ab** (fjj-1-104)

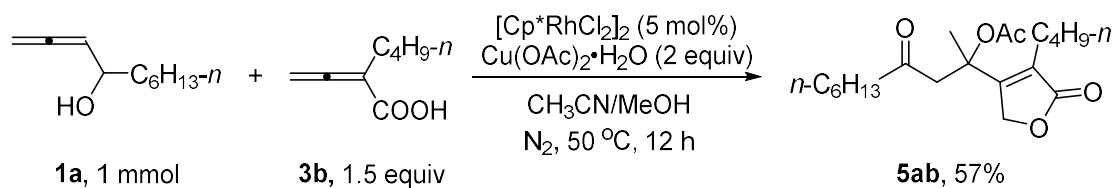

Following **Typical Procedure I**, the reaction of **1a** (154.2 mg, 1.0 mmol), **3b** (210.4 mg, 1.5 mmol),  $[\text{Cp}^*\text{RhCl}_2]_2$  (30.9 mg, 0.05 mmol), and  $\text{Cu}(\text{OAc})_2 \cdot \text{H}_2\text{O}$  (399.4 mg, 2.0 mmol) in  $\text{CH}_3\text{CN}$  (2.7 mL)/ $\text{MeOH}$  (0.13 mL) afforded **5ab** (201.2 mg, 57%) as an oil [eluent: petroleum ether/ethyl acetate = 10/1 (500 mL) to 5/1 (500 mL)]:  $^1\text{H}$  NMR (300 MHz,  $\text{CDCl}_3$ )  $\delta$  4.94 (dd,  $J_1 = 14.9$  Hz,  $J_2 = 14.7$  Hz, 2 H,  $\text{OCH}_2$ ), 3.05 (d,  $J = 14.7$  Hz, 1 H, one proton of  $\text{CH}_2$ ), 2.73 (d,  $J = 14.7$  Hz, 1 H, one proton of  $\text{CH}_2$ ), 2.44 (t,  $J = 7.2$  Hz, 2 H,  $\text{CH}_2$ ), 2.32 (t,  $J = 7.7$  Hz, 2 H,  $\text{CH}_2$ ), 2.11 (s, 3 H,  $\text{OAc}$ ), 1.57-1.41 (m, 7 H,  $\text{CH}_3$  and  $\text{CH}_2 \times 2$ ), 1.41-1.16 (m, 8 H,  $\text{CH}_2 \times 4$ ), 0.92 (t,  $J = 7.2$  Hz, 3 H,  $\text{CH}_3$ ), 0.87 (t,  $J = 6.9$  Hz, 3 H,  $\text{CH}_3$ );  $^{13}\text{C}$  NMR (75 MHz,  $\text{CDCl}_3$ )  $\delta$  206.6, 171.8, 170.0, 157.4, 131.4, 85.0, 57.5, 48.7, 44.7, 31.5, 30.1, 28.6, 25.2, 23.6, 23.1, 22.5, 22.4, 20.6; 13.9, 13.8; IR (neat)  $\nu$  ( $\text{cm}^{-1}$ ) 2959, 2932, 2861, 1747, 1710, 1455, 1403, 1368, 1283, 1220, 1127, 1038; MS (EI):  $m/z$  (%) 352 ( $\text{M}^+$ , 2.53), 43 (100); HRMS Calcd for  $\text{C}_{20}\text{H}_{32}\text{O}_5$  ( $\text{M}^+$ ): 352.2250; Found: 352.2249.

#### 4.3 Synthesis of 4-(2-acetoxy-4-oxopentadecan-2-yl)-3-propyl-2(5*H*)-furanone **5ba** (fjj-1-073)

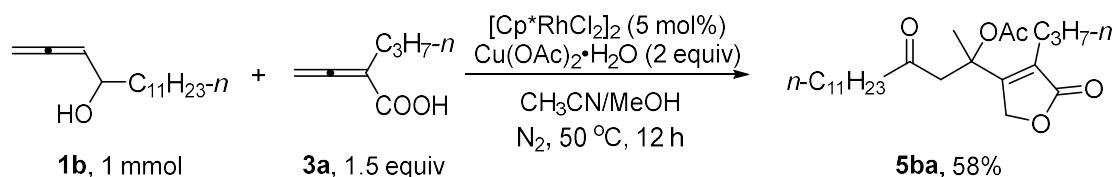

Following **Typical Procedure I**, the reaction of **1b** (224.3 mg, 1.0 mmol), **3a** (189.4 mg, 1.5 mmol),  $[\text{Cp}^*\text{RhCl}_2]_2$  (31.2 mg, 0.05 mmol), and  $\text{Cu}(\text{OAc})_2 \cdot \text{H}_2\text{O}$  (400.1 mg, 2.0 mmol) in  $\text{CH}_3\text{CN}$  (2.7 mL)/ $\text{MeOH}$  (0.13 mL) afforded **5ba** (237.1 mg, 58%) as an oil [eluent: petroleum ether/ethyl acetate = 10/1 (1000 mL) to 5/1 (1000 mL)]:  $^1\text{H}$  NMR (300 MHz,  $\text{CDCl}_3$ )  $\delta$  4.95 (dd,  $J_1 = 14.6$  Hz,  $J_2 = 14.1$  Hz, 2 H,  $\text{OCH}_2$ ), 3.06 (d,  $J = 14.7$  Hz, 1 H, one proton of  $\text{CH}_2$ ), 2.74 (d,  $J = 15.0$  Hz, 1 H, one proton of  $\text{CH}_2$ ), 2.44 (t,  $J = 7.4$  Hz, 2 H,  $\text{CH}_2$ ), 2.31 (t,  $J = 7.7$  Hz, 2 H,  $\text{CH}_2$ ), 2.10 (s, 3 H,  $\text{OAc}$ ), 1.62-1.38 (m, 7 H,  $\text{CH}_2 \times 2$  and  $\text{CH}_3$ ), 1.37-1.14 (m, 16 H,  $\text{CH}_2 \times 8$ ), 1.00-0.82 (m, 6 H,  $\text{CH}_3 \times 2$ );  $^{13}\text{C}$  NMR (75 MHz,  $\text{CDCl}_3$ )  $\delta$  206.5, 171.7, 169.9, 157.7, 131.2, 85.0, 57.4, 48.6, 44.6, 31.8, 29.5, 29.32, 29.29, 29.2, 28.9, 25.7, 25.2, 23.1, 22.6, 21.3, 20.5, 14.0, 13.7; IR (neat)  $\nu$  ( $\text{cm}^{-1}$ ) 2959, 2925, 2854, 1767, 1747, 1715, 1682, 1465, 1455, 1401, 1367, 1200, 1135, 1029; MS (EI):  $m/z$  (%) 408 ( $\text{M}^+$ , 1.79), 43 (100); HRMS Calcd for  $\text{C}_{24}\text{H}_{40}\text{O}_5$  ( $\text{M}^+$ ): 408.2876; Found: 408.2875.

4.4 Synthesis of 4-(2-acetoxy-4-oxopentadecan-2-yl)-3-butyl-2(5*H*)-furanone **5bb** (fjj-1-075)

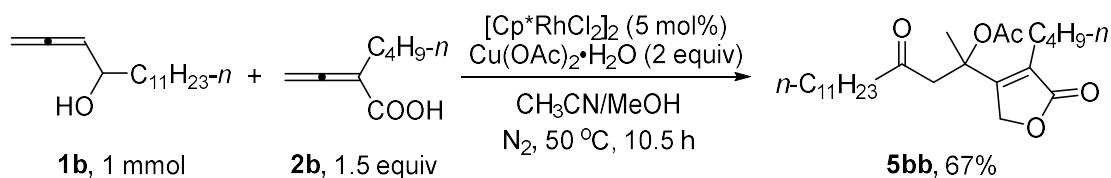

Following **Typical Procedure I**, the reaction of **1b** (226.5 mg, 1.0 mmol), **2b** (210.1 mg, 1.5 mmol),  $[\text{Cp}^*\text{RhCl}_2]_2$  (31.3 mg, 0.05 mmol), and  $\text{Cu}(\text{OAc})_2 \cdot \text{H}_2\text{O}$  (400.1 mg, 2.0 mmol) in  $\text{CH}_3\text{CN}$  (2.7 mL)/ $\text{MeOH}$  (0.13 mL) afforded **5bb** (286.2 mg, 67%)

as an oil [eluent: petroleum ether/ethyl acetate = 10/1 (500 mL) to 5/1 (500 mL)]:  $^1\text{H}$  NMR (300 MHz,  $\text{CDCl}_3$ )  $\delta$  4.94 (dd,  $J_1 = 14.9$  Hz,  $J_2 = 14.7$  Hz, 2 H,  $\text{OCH}_2$ ), 3.05 (d,  $J = 14.7$  Hz, 1 H, one proton of  $\text{CH}_2$ ), 2.72 (d,  $J = 14.7$  Hz, 1 H, one proton of  $\text{CH}_2$ ), 2.43 (t,  $J = 7.2$  Hz, 2 H,  $\text{CH}_2$ ), 2.32 (t,  $J = 7.7$  Hz, 2 H,  $\text{CH}_2$ ), 2.10 (s, 3 H,  $\text{OAc}$ ), 1.56-1.40 (m, 7 H,  $\text{CH}_2 \times 2$  and  $\text{CH}_3$ ), 1.40-1.16 (m, 18 H,  $\text{CH}_2 \times 9$ ), 0.98-0.80 (m, 6 H,  $\text{CH}_3 \times 2$ );  $^{13}\text{C}$  NMR (75 MHz,  $\text{CDCl}_3$ )  $\delta$  206.6, 171.7, 170.0, 157.4, 131.5, 85.0, 57.5, 48.7, 44.7, 31.8, 30.1, 29.5, 29.4, 29.3, 29.2, 29.0, 25.2, 23.6, 23.2, 22.6, 22.5, 20.6, 14.0, 13.7; IR (neat)  $\nu$  ( $\text{cm}^{-1}$ ) 2955, 2924, 2852, 1768, 1747, 1715, 1682, 1461, 1455, 1406, 1368, 1225, 1129, 1035; MS (EI):  $m/z$  (%) 422 ( $\text{M}^+$ , 4.92), 43 (100); HRMS Calcd for  $\text{C}_{25}\text{H}_{42}\text{O}_5$  ( $\text{M}^+$ ): 422.3032; Found: 422.3032.

#### 4.5 Synthesis of 4-(2-acetoxy-4-oxo-5-phenylpentan-2-yl)-3-propyl-2(5H)-furanone **5ca** (fjj-1-076)

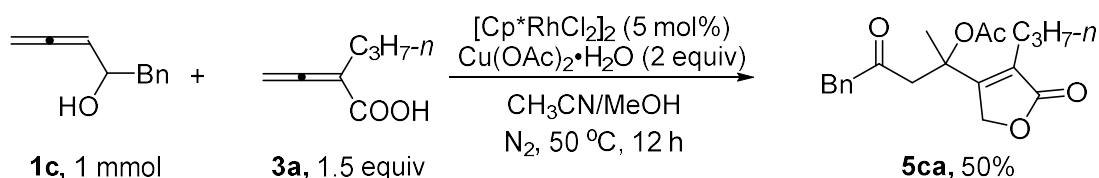

Following **Typical Procedure I**, the reaction of **1c** (160.2 mg, 1.0 mmol), **3a** (189.2 mg, 1.5 mmol),  $[\text{Cp}^*\text{RhCl}_2]_2$  (31.2 mg, 0.05 mmol), and  $\text{Cu(OAc)}_2 \cdot \text{H}_2\text{O}$  (399.8 mg, 2.0 mmol) in  $\text{CH}_3\text{CN}$  (2.7 mL)/ $\text{MeOH}$  (0.13 mL) afforded **5ca** (173.0 mg, 50%) as an oil [eluent: petroleum ether/ethyl acetate = 10/1 (500 mL) to 5/1 (1000 mL)]:  $^1\text{H}$  NMR (300 MHz,  $\text{CDCl}_3$ )  $\delta$  7.37-7.21 (m, 3 H, ArH), 7.14 (d,  $J = 6.6$  Hz, 2 H, ArH), 4.91 (d,  $J = 14.7$  Hz, 1 H, one proton of  $\text{OCH}_2$ ), 4.86 (d,  $J = 14.4$  Hz, 1 H, one proton of  $\text{OCH}_2$ ),



3.72 (s, 2 H, CH<sub>2</sub>), 3.10 (d, *J* = 15.3 Hz, 1 H, one proton of CH<sub>2</sub>), 2.77 (d, *J* = 15.3 Hz, 1 H, one proton of CH<sub>2</sub>), 2.29 (t, *J* = 7.5 Hz, 2 H, CH<sub>2</sub>), 2.04 (s, 3 H, OAc), 1.62-1.43 (m, 5 H, CH<sub>2</sub>, CH<sub>3</sub>), 0.91 (t, *J* = 7.4 Hz, 3 H, CH<sub>3</sub>); <sup>13</sup>C NMR (75 MHz, CDCl<sub>3</sub>) δ 203.6, 171.6, 169.9, 157.5, 133.2, 131.2, 129.4, 128.7, 127.1, 84.9, 57.3, 51.4, 47.6, 25.6, 25.1, 21.2, 20.5, 13.6; IR (neat) ν (cm<sup>-1</sup>) 3089, 3063, 3030, 2962, 2935, 2873, 1748, 1715, 1681, 1603, 1497, 1455, 1367, 1309, 1222, 1131, 1048, 1026; MS (EI): *m/z* (%) 344 (M<sup>+</sup>, 7.29), 211 (100); HRMS Calcd for C<sub>20</sub>H<sub>24</sub>O<sub>5</sub> (M<sup>+</sup>): 344.1624; Found: 344.1625.

4.6 Synthesis of 4-(2-acetoxy-4-oxo-5-phenylpentan-2-yl)-3-butyl-2(5*H*)-furanone **5cb** (fjj-1-087)

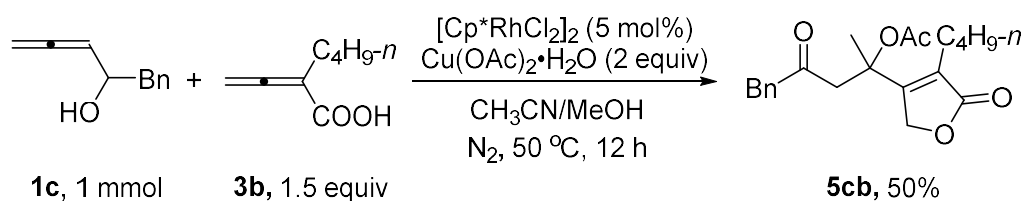

Following **Typical Procedure I**, the reaction of **1c** (159.2 mg, 1.0 mmol), **3b** (210.6 mg, 1.5 mmol), [Cp<sup>\*</sup>RhCl<sub>2</sub>]<sub>2</sub> (31.0 mg, 0.05 mmol), and Cu(OAc)<sub>2</sub>·H<sub>2</sub>O (399.7 mg, 2.0 mmol) in CH<sub>3</sub>CN (2.7 mL)/MeOH (0.13 mL) afforded **5cb** (179.7 mg, 50%) as an oil [eluent: petroleum ether/ethyl acetate = 15/1 (500 mL) to 8/1 (500 mL), then 5/1 (1000 mL)]: <sup>1</sup>H NMR (300 MHz, CDCl<sub>3</sub>) δ 7.38-7.23 (m, 3 H, ArH), 7.17-7.10 (m, 2 H, ArH), 4.91 (d, *J* = 14.4 Hz, 1 H, one proton of OCH<sub>2</sub>), 4.86 (d, *J* = 14.4 Hz, 1 H, one proton of OCH<sub>2</sub>), 3.72 (s, 2 H, CH<sub>2</sub>), 3.10 (d, *J* = 15.0 Hz, 1 H, one proton of CH<sub>2</sub>), 2.76 (d, *J* = 15.3 Hz, 1 H, one proton of CH<sub>2</sub>), 2.31 (t, *J* = 7.5 Hz, 2 H, CH<sub>2</sub>), 2.05 (s, 3 H, OAc), 1.56-1.39 (m, 5 H, CH<sub>2</sub> and CH<sub>3</sub>), 1.39-1.22 (m, 2 H, CH<sub>2</sub>), 0.91 (t, *J* = 7.1

Hz, 3 H, CH<sub>3</sub>); <sup>13</sup>C NMR (75 MHz, CDCl<sub>3</sub>) δ 203.7, 171.7, 169.9, 157.3, 133.2, 131.5, 129.5, 128.7, 127.2, 85.0, 57.4, 51.5, 47.7, 30.1, 25.1, 23.6, 22.4, 20.5, 13.7; IR (neat)  $\nu$  (cm<sup>-1</sup>) 3092, 3062, 3030, 2958, 2929, 2865, 1748, 1714, 1603, 1497, 1455, 1362, 1308, 1220, 1124, 1034; MS (EI): *m/z* (%) 358 (M<sup>+</sup>, 5.66), 225 (100); HRMS Calcd for C<sub>21</sub>H<sub>26</sub>O<sub>5</sub> (M<sup>+</sup>): 358.1780; Found: 358.1779.

#### 4.7 Synthesis of 4-(2-acetoxy-4-cyclohexyl-4-oxobutan-2-yl)-3-propyl-2(5*H*)-furanone **5da** (fjj-1-066)

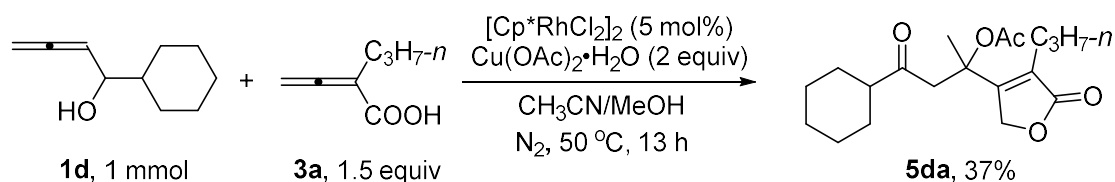

Following **Typical Procedure I**, the reaction of **1d** (151.6 mg, 1.0 mmol), **3a** (189.3 mg, 1.5 mmol), [Cp<sup>\*</sup>RhCl<sub>2</sub>]<sub>2</sub> (31.0 mg, 0.05 mmol), and Cu(OAc)<sub>2</sub>·H<sub>2</sub>O (399.6 mg, 2.0 mmol) in CH<sub>3</sub>CN (2.7 mL)/MeOH (0.13 mL) afforded **5da** (124.7 mg, 37%) as an oil [eluent: petroleum ether/ethyl acetate = 10/1 (500 mL) to 5/1 (500 mL)]: <sup>1</sup>H NMR (300 MHz, CDCl<sub>3</sub>) δ 4.98 (d, *J* = 14.4 Hz, 1 H, one proton of OCH<sub>2</sub>), 4.92 (d, *J* = 14.4 Hz, 1 H, one proton of OCH<sub>2</sub>), 3.16 (d, *J* = 15.3 Hz, 1 H, one proton of CH<sub>2</sub>), 2.75 (d, *J* = 15.3 Hz, 1 H, one proton of CH<sub>2</sub>), 2.42-2.25 (m, 3 H, CH and CH<sub>2</sub>), 2.10 (s, 3 H, OAc), 1.89-1.60 (m, 5 H, CH<sub>2</sub> × 2 and one proton of CH<sub>2</sub>), 1.60-1.42 (m, 5 H, CH<sub>2</sub> and CH<sub>3</sub>), 1.36-1.10 (m, 5 H, CH<sub>2</sub> × 2 and one proton of CH<sub>2</sub>), 0.94 (t, *J* = 7.4 Hz, 3 H, CH<sub>3</sub>); <sup>13</sup>C NMR (75 MHz, CDCl<sub>3</sub>) δ 209.3, 171.8, 170.0, 157.8, 131.1, 85.1, 57.6, 51.8, 46.6, 28.1, 27.6, 25.7, 25.6, 25.5, 25.3, 21.3, 20.6, 13.7; IR (neat)  $\nu$  (cm<sup>-1</sup>) 2959,

2930, 2855, 1748, 1706, 1451, 1372, 1291, 1221, 1136, 1028; MS (EI):  $m/z$  (%) 336 ( $M^+$ , 4.52), 83 (100); HRMS Calcd for  $C_{19}H_{28}O_5$  ( $M^+$ ): 336.1937; Found: 336.1934.

#### 4.8 Synthesis of 4-(2-acetoxy-5,5-dimethyl-4-oxohexan-2-yl)-3-propyl-2(5H)-furanone **5ea** (fjj-1-068)

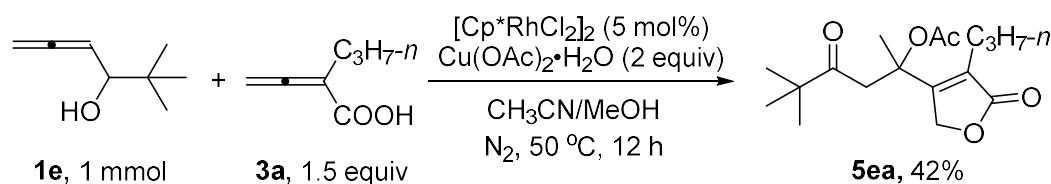

Following **Typical Procedure I**, the reaction of **1e** (127.8 mg, 1.0 mmol), **3a** (189.3 mg, 1.5 mmol),  $[Cp^*RhCl_2]_2$  (31.3 mg, 0.05 mmol), and  $Cu(OAc)_2 \cdot H_2O$  (398.3 mg, 2.0 mmol) in  $CH_3CN$  (2.7 mL)/MeOH (0.13 mL) afforded **5ea** (130.8 mg, 42%) as an oil [eluent: petroleum ether/ethyl acetate = 10/1 (500 mL) to 5/1 (600 mL)]:  $^1H$  NMR (300 MHz,  $CDCl_3$ )  $\delta$  5.00 (d,  $J = 14.1$  Hz, 1 H, one proton of  $OCH_2$ ), 4.94 (d,  $J = 14.4$  Hz, 1 H, one proton of  $OCH_2$ ), 3.31 (d,  $J = 16.5$  Hz, 1 H, one proton of  $CH_2$ ), 2.76 (d,  $J = 16.2$  Hz, 1 H, one proton of  $CH_2$ ), 2.32 (t,  $J = 7.5$  Hz, 2 H,  $CH_2$ ), 2.10 (s, 3 H, OAc), 1.64-1.48 (m, 5 H,  $CH_2$  and  $CH_3$ ), 1.11 (s, 9 H,  $CH_3 \times 3$ ), 0.95 (t,  $J = 7.5$  Hz, 3 H,  $CH_3$ );  $^{13}C$  NMR (75 MHz,  $CDCl_3$ )  $\delta$  210.6, 172.0, 170.0, 158.1, 130.7, 84.9, 57.7, 44.6, 42.4, 25.9, 25.72, 25.67, 21.3, 20.6, 13.7; IR (neat)  $\nu$  ( $cm^{-1}$ ) 2963, 2933, 2870, 1748, 1713, 1507, 1479, 1463, 1452, 1394, 1367, 1261, 1222, 1170, 1123, 1051, 1026; MS (EI):  $m/z$  (%) 310 ( $M^+$ , 3.70), 43 (100); HRMS Calcd for  $C_{17}H_{26}O_5$  ( $M^+$ ): 310.1780; Found: 310.1780.

#### 4.9 Synthesis of 4-(2-acetoxy-9-chloro-4-oxononan-2-yl)-3-propyl-2(5*H*)-furanone **5fa**

(fjj-1-072)

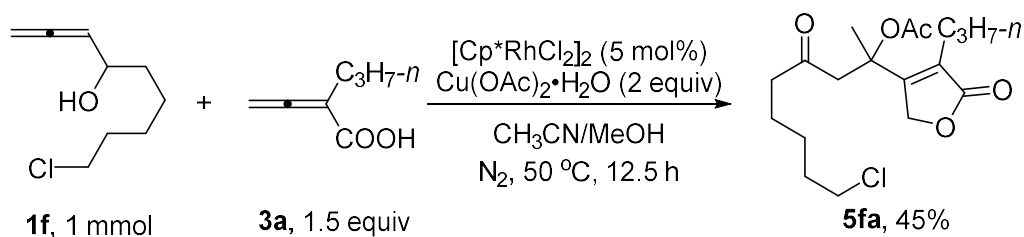

Following **Typical Procedure I**, the reaction of **1f** (173.4 mg, 1.0 mmol), **3a** (189.5 mg, 1.5 mmol),  $[\text{Cp}^*\text{RhCl}_2]_2$  (31.2 mg, 0.05 mmol), and  $\text{Cu(OAc)}_2 \cdot \text{H}_2\text{O}$  (400.8 mg, 2.0 mmol) in  $\text{CH}_3\text{CN}$  (2.7 mL)/ $\text{MeOH}$  (0.13 mL) afforded **5fa** (161.2 mg, 45%) as an oil [eluent: petroleum ether/ethyl acetate = 10/1 (500 mL) to 5/1 (1500 mL)]:  $^1\text{H NMR}$  (300 MHz,  $\text{CDCl}_3$ )  $\delta$  4.95 (dd,  $J_1 = 14.4$  Hz,  $J_2 = 14.1$  Hz, 2 H,  $\text{OCH}_2$ ), 3.52 (t,  $J = 6.8$  Hz, 2 H,  $\text{CH}_2\text{Cl}$ ), 3.07 (d,  $J = 15.0$  Hz, 1 H, one proton of  $\text{CH}_2$ ), 2.76 (d,  $J = 15.0$  Hz, 1 H, one proton of  $\text{CH}_2$ ), 2.48 (t,  $J = 7.1$  Hz, 2 H,  $\text{CH}_2$ ), 2.31 (t,  $J = 7.5$  Hz, 2 H,  $\text{CH}_2$ ), 2.11 (s, 3 H,  $\text{OAc}$ ), 1.81-1.68 (m, 2 H,  $\text{CH}_2$ ), 1.62-1.45 (m, 7 H,  $\text{CH}_2 \times 2$  and  $\text{CH}_3$ ), 1.45-1.30 (m, 2 H,  $\text{CH}_2$ ), 0.94 (t,  $J = 7.4$  Hz, 3 H,  $\text{CH}_3$ );  $^{13}\text{C NMR}$  (75 MHz,  $\text{CDCl}_3$ )  $\delta$  205.9, 171.6, 169.8, 157.6, 130.9, 84.8, 57.3, 48.4, 44.6, 44.1, 32.1, 25.9, 25.5, 25.0, 22.1, 21.2, 20.4, 13.5; IR (neat)  $\nu$  ( $\text{cm}^{-1}$ ) 2955, 2928, 2873, 1747, 1712, 1682, 1455, 1406, 1373, 1257, 1219, 1134, 1100, 1066, 1026; MS (EI):  $m/z$  (%) 360 [ $\text{M}^{(37}\text{Cl})^+$ , 1.01], 358 [ $\text{M}^{(35}\text{Cl})^+$ , 2.08], 43 (100); HRMS Calcd for  $\text{C}_{18}\text{H}_{27}^{35}\text{ClO}_5$  ( $\text{M}^+$ ): 358.1547; Found: 358.1548.

#### 4.10 Synthesis of 4-(2-acetoxy-9-hydroxy-4-oxononan-2-yl)-3-butyl-2(5*H*)-furanone

**5gb** (fjj-1-111)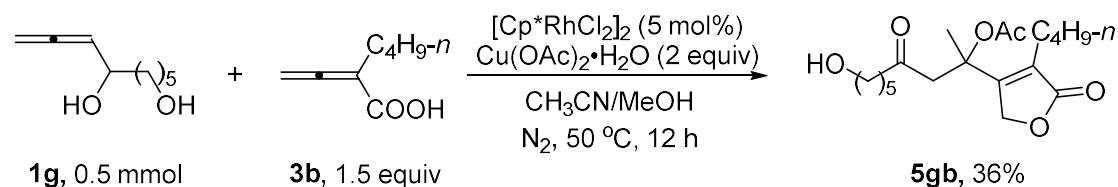

Following **Typical Procedure I**, the reaction of **1g** (77.5 mg, 0.5 mmol), **3b** (105.5 mg, 0.75 mmol),  $[\text{Cp}^*\text{RhCl}_2]_2$  (15.9 mg, 0.025 mmol), and  $\text{Cu}(\text{OAc})_2 \cdot \text{H}_2\text{O}$  (199.8 mg, 2.0 mmol) in  $\text{CH}_3\text{CN}$  (1.35 mL)/ $\text{MeOH}$  (67.5  $\mu\text{L}$ ) afforded **5gb** (65.9 mg, 36%, 95% purity) as an oil [eluent: petroleum ether/ethyl acetate = 5/1 (500 mL) to 1/1 (500 mL), then 1/2 (500 mL)]:  $^1\text{H NMR}$  (300 MHz,  $\text{CDCl}_3$ )  $\delta$  4.94 (dd,  $J_1 = 14.7$  Hz,  $J_2 = 14.7$  Hz, 2 H,  $\text{OCH}_2$ ), 3.71 (s, 2 H,  $\text{OCH}_2$ ), 3.07 (d,  $J = 14.4$  Hz, 1 H, one proton of  $\text{CH}_2$ ), 2.95-2.60 (m, 2 H, one proton of  $\text{CH}_2$  and OH), 2.48 (t,  $J = 6.7$  Hz, 2 H,  $\text{CH}_2$ ), 2.32 (t,  $J = 8.1$  Hz, 2 H,  $\text{CH}_2$ ), 2.11 (s, 3 H, OAc), 1.64-1.42 (m, 9 H,  $\text{CH}_3$  and  $\text{CH}_2 \times 3$ ), 1.42-1.22 (m, 4 H,  $\text{CH}_2 \times 2$ ), 0.93 (t,  $J = 7.1$  Hz, 3 H,  $\text{CH}_3$ );  $^{13}\text{C NMR}$  (75 MHz,  $\text{CDCl}_3$ )  $\delta$  206.5, 171.9, 170.0, 157.6, 131.3, 85.1, 62.4, 57.4, 48.6, 44.4, 32.3, 30.1, 25.1, 25.0, 23.5, 22.7, 22.4, 20.6, 13.7; IR (neat)  $\nu$  ( $\text{cm}^{-1}$ ) 3479, 2935, 2865, 1747, 1454, 1369, 1227, 1132, 1039; MS (EI):  $m/z$  (%) 354 ( $\text{M}^+$ , 0.40), 43 (100); HRMS Calcd for  $\text{C}_{19}\text{H}_{30}\text{O}_6$  ( $\text{M}^+$ ): 354.2042; Found: 354.2039.

4.11 Synthesis of 4-(2-acetoxy-4-oxo-4-phenylbutan-2-yl)-3-propyl-2(5*H*)-furanone**5ha** (fjj-1-064)

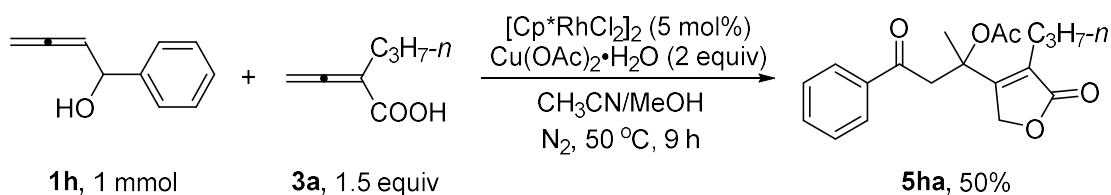

Following **Typical Procedure I**, the reaction of **1h** (146.3 mg, 1.0 mmol), **3a** (189.0 mg, 1.5 mmol),  $[\text{Cp}^*\text{RhCl}_2]_2$  (30.9 mg, 0.05 mmol), and  $\text{Cu}(\text{OAc})_2 \cdot \text{H}_2\text{O}$  (399.2 mg, 2.0 mmol) in  $\text{CH}_3\text{CN}$  (2.7 mL)/ $\text{MeOH}$  (0.13 mL) afforded **5ha** (163.3 mg, 50%) as an oil [eluent: petroleum ether/ethyl acetate = 10/1 (500 mL) to 5/1 (1500 mL)]:  $^1\text{H}$  NMR (300 MHz,  $\text{CDCl}_3$ )  $\delta$  7.89 (d,  $J = 8.1$  Hz, 2 H, ArH), 7.60-7.50 (m, 1 H, ArH), 7.44 (t,  $J = 7.1$  Hz, 2 H, ArH), 5.03 (d,  $J = 14.1$  Hz, 1 H, one proton of  $\text{OCH}_2$ ), 4.96 (d,  $J = 14.4$  Hz, 1 H, one proton of  $\text{OCH}_2$ ), 3.72 (d,  $J = 15.6$  Hz, 1 H, one proton of  $\text{CH}_2$ ), 3.29 (d,  $J = 15.6$  Hz, 1 H, one proton of  $\text{CH}_2$ ), 2.31 (t,  $J = 7.7$  Hz, 2 H,  $\text{CH}_2$ ), 1.97 (s, 3 H, OAc), 1.63 (s, 3 H,  $\text{CH}_3$ ), 1.60-1.42 (m, 2 H,  $\text{CH}_2$ ), 0.92 (t,  $J = 7.4$  Hz, 3 H,  $\text{CH}_3$ );  $^{13}\text{C}$  NMR (75 MHz,  $\text{CDCl}_3$ )  $\delta$  195.4, 171.6, 169.8, 157.1, 136.6, 133.3, 131.4, 128.4, 128.1, 84.9, 57.3, 44.1, 25.49, 25.46, 21.1, 20.3, 13.5; IR (neat)  $\nu$  ( $\text{cm}^{-1}$ ) 3061, 2962, 2933, 2869, 1748, 1694, 1682, 1597, 1581, 1448, 1364, 1223, 1123, 1057, 1023; MS (EI):  $m/z$  (%) 330 ( $\text{M}^+$ , 3.97), 105 (100); HRMS Calcd for  $\text{C}_{19}\text{H}_{22}\text{O}_5$  ( $\text{M}^+$ ): 330.1467; Found: 330.1468.

4.12 Synthesis of 4-(2-acetoxy-4-oxo-4-(*p*-tolyl)butan-2-yl)-3-propyl-2(5*H*)-furanone  
**5ia** (fjj-2-022)

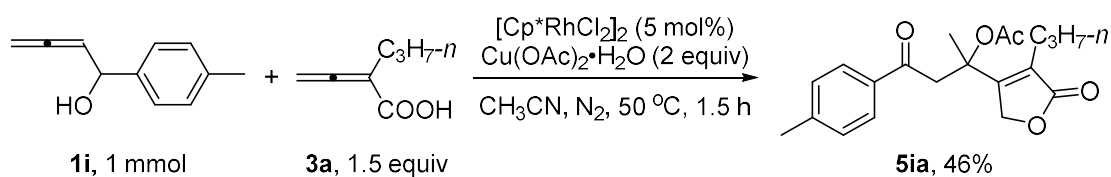

**Typical Procedure II:** To a dry Schlenk tube were added  $[\text{Cp}^*\text{RhCl}_2]_2$  (31.0 mg, 0.05 mmol),  $\text{Cu(OAc)}_2\cdot\text{H}_2\text{O}$  (399.3 mg, 2.0 mmol), and **3a** (189.2 mg, 1.5 mmol). The reaction vessel was degassed under vacuum and backfilled with nitrogen for three times. Then **1i** (160.3 mg, 1.0 mmol) and  $\text{CH}_3\text{CN}$  (2.7 mL) were added under nitrogen atmosphere sequentially. After being continuously stirred at 50 °C for 1.5 h, the reaction was complete as monitored by thin layer chromatography (TLC). After filtration through a short column of silica gel eluted with ethyl acetate (20 mL  $\times$  3), the combined filtrate was concentrated in vacuo and the crude residual was purified by chromatography on silica gel [eluent: petroleum ether/ethyl ether = 3/1 (1000 mL) to petroleum ether/ethyl acetate = 2/1 (300 mL)] to afford **5ia** (160.2 mg, 46%) as an oil:  $^1\text{H NMR}$  (300 MHz,  $\text{CDCl}_3$ ):  $\delta$  7.79 (d,  $J = 8.4$  Hz, 2 H, ArH), 7.24 (d,  $J = 8.1$  Hz, 2 H, ArH), 5.03 (d,  $J = 14.1$  Hz, 1 H, one proton of  $\text{OCH}_2$ ), 4.97 (d,  $J = 14.1$  Hz, 1 H, one proton of  $\text{OCH}_2$ ), 3.70 (d,  $J = 15.3$  Hz, 1 H, one proton of  $\text{CH}_2$ ), 3.21 (d,  $J = 15.3$  Hz, 1 H, one proton of  $\text{CH}_2$ ), 2.40 (s, 3 H,  $\text{CH}_3$ ), 2.30 (t,  $J = 7.5$  Hz, 2 H,  $\text{CH}_2$ ), 2.00 (s, 3 H, OAc), 1.63 (s, 3 H,  $\text{CH}_3$ ), 1.60-1.42 (m, 2 H,  $\text{CH}_2$ ), 0.92 (t,  $J = 7.4$  Hz, 3 H,  $\text{CH}_3$ );  $^{13}\text{C NMR}$  (75 MHz,  $\text{CDCl}_3$ )  $\delta$  195.1, 171.6, 169.9, 157.3, 144.3, 134.3, 131.4, 129.2, 128.4, 85.0, 57.4, 44.3, 25.6, 25.5, 21.5, 21.2, 20.4, 13.6; IR (neat)  $\nu$  ( $\text{cm}^{-1}$ ) 3032, 2962, 2934, 2873, 1747, 1690, 1669, 1607, 1572, 1451, 1407, 1366, 1224, 1183, 1121, 1057, 1028; MS (EI):  $m/z$  (%) 344 ( $\text{M}^+$ , 8.82), 119 (100); HRMS Calcd for  $\text{C}_{20}\text{H}_{24}\text{O}_5$  ( $\text{M}^+$ ):

344.1624; Found: 344.1623.

4.13 Synthesis of 4-(2-acetoxy-4-(3,4-(methylenedioxy)phenyl)-4-oxobutan-2-yl)-3-propyl-2(5*H*)-furanone **5ja** (fjj-1-054)

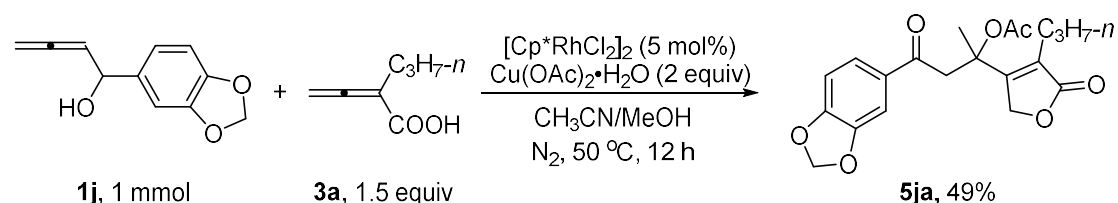

Following **Typical Procedure I**, the reaction of **1j** (189.0 mg, 1.0 mmol), **3a** (189.1 mg, 1.5 mmol),  $[\text{Cp}^*\text{RhCl}_2]_2$  (30.8 mg, 0.05 mmol), and  $\text{Cu}(\text{OAc})_2 \cdot \text{H}_2\text{O}$  (399.2 mg, 2.0 mmol) in  $\text{CH}_3\text{CN}$  (2.7 mL)/ $\text{MeOH}$  (0.13 mL) afforded **5ja** (183.7 mg, 49%) as an oil [eluent: petroleum ether/ethyl acetate = 20/1 (1000 mL) to 5/1 (1000 mL), then 2/1 (200 mL)]:  $^1\text{H}$  NMR (300 MHz,  $\text{CDCl}_3$ )  $\delta$  7.52 (dd,  $J_1 = 8.1$  Hz,  $J_2 = 1.5$  Hz, 1 H, ArH), 7.34 (d,  $J = 1.5$  Hz, 1 H, ArH), 6.84 (d,  $J = 8.1$  Hz, 1 H, ArH), 6.04 (s, 2 H,  $\text{O}_2\text{CH}_2$ ), 5.01 (dd,  $J_1 = 14.7$  Hz,  $J_2 = 14.4$  Hz, 2 H,  $\text{OCH}_2$ ), 3.66 (d,  $J = 15.3$  Hz, 1 H, one proton of  $\text{CH}_2$ ), 3.14 (d,  $J = 15.3$  Hz, 1 H, one proton of  $\text{CH}_2$ ), 2.30 (t,  $J = 7.7$  Hz, 2 H,  $\text{CH}_2$ ), 2.04 (s, 3 H,  $\text{OAc}$ ), 1.63 (s, 3 H,  $\text{CH}_3$ ), 1.58-1.43 (m, 2 H,  $\text{CH}_2$ ), 0.91 (t,  $J = 7.4$  Hz, 3 H,  $\text{CH}_3$ );  $^{13}\text{C}$  NMR (75 MHz,  $\text{CDCl}_3$ )  $\delta$  193.5, 171.7, 170.0, 157.5, 152.1, 148.2, 131.7, 131.4, 125.2, 107.9, 107.8, 101.9, 85.1, 57.6, 44.5, 25.64, 25.58, 21.3, 20.5, 13.6; IR (neat)  $\nu$  ( $\text{cm}^{-1}$ ) 3080, 2963, 2929, 2874, 1748, 1682, 1604, 1505, 1489, 1446, 1367, 1256, 1220, 1108, 1036; MS (EI):  $m/z$  (%) 374 ( $\text{M}^+$ , 8.42), 149 (100); HRMS Calcd for  $\text{C}_{20}\text{H}_{22}\text{O}_7\text{Na}$  ( $\text{M}+\text{Na}$ ) $^+$ : 397.1258; Found: 397.1257.



4.14 Synthesis of 4-(2-acetoxy-4-(3-chlorophenyl)-4-oxobutan-2-yl)-3-butyl-2(5H)-furanone **5kb** (fjj-1-095)

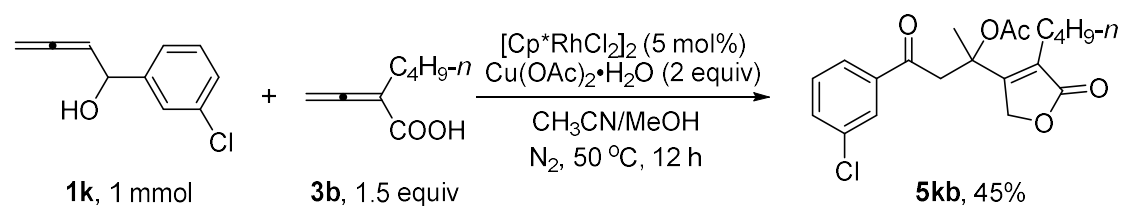

Following **Typical Procedure I**, the reaction of **1k** (180.2 mg, 1.0 mmol), **3b** (210.3 mg, 1.5 mmol),  $[\text{Cp}^*\text{RhCl}_2]_2$  (31.1 mg, 0.05 mmol), and  $\text{Cu}(\text{OAc})_2\cdot\text{H}_2\text{O}$  (399.2 mg, 2.0 mmol) in  $\text{CH}_3\text{CN}$  (2.7 mL)/ $\text{MeOH}$  (0.13 mL) afforded **5kb** (170.3 mg, 45%) as an oil [eluent: petroleum ether/ethyl acetate = 10/1 (500 mL) to 5/1 (1000 mL), then 4/1 (500 mL)]:  $^1\text{H NMR}$  (300 MHz,  $\text{CDCl}_3$ )  $\delta$  7.87-7.83 (m, 1 H, ArH), 7.78 (d,  $J = 3.9$  Hz, 1 H, ArH), 7.54 (d,  $J = 7.8$  Hz, 1 H, ArH), 7.41 (t,  $J = 8.0$  Hz, 1 H, ArH), 5.02 (d,  $J = 14.1$  Hz, 1 H, one proton of  $\text{OCH}_2$ ), 4.96 (d,  $J = 14.1$  Hz, 1 H, one proton of  $\text{OCH}_2$ ), 3.70 (d,  $J = 15.9$  Hz, 1 H, one proton of  $\text{CH}_2$ ), 3.23 (d,  $J = 15.6$  Hz, 1 H, one proton of  $\text{CH}_2$ ), 2.32 (t,  $J = 7.7$  Hz, 2 H,  $\text{CH}_2$ ), 2.02 (s, 3 H, OAc), 1.64 (s, 3 H,  $\text{CH}_3$ ), 1.54-1.38 (m, 2 H,  $\text{CH}_2$ ), 1.38-1.22 (m, 2 H,  $\text{CH}_2$ ), 0.92 (t,  $J = 7.2$  Hz, 3 H,  $\text{CH}_3$ );  $^{13}\text{C NMR}$  (75 MHz,  $\text{CDCl}_3$ )  $\delta$  194.4, 171.6, 170.0, 156.7, 138.3, 135.0, 133.4, 132.1, 130.0, 128.3, 126.6, 84.9, 57.4, 44.6, 30.1, 25.6, 23.6, 22.4, 20.5; 13.8; IR (neat)  $\nu$  ( $\text{cm}^{-1}$ ) 3062, 2958, 2929, 2872, 1755, 1748, 1698, 1682, 1570, 1424, 1366, 1224, 1123, 1031; MS (EI):  $m/z$  (%) 380  $[\text{M}(^{37}\text{Cl})^+]$ , 2.47], 378  $[\text{M}(^{35}\text{Cl})^+]$ , 7.20], 139 (100); HRMS Calcd for  $\text{C}_{20}\text{H}_{23}\text{O}_5^{35}\text{Cl}$  ( $\text{M}^+$ ): 378.1234; Found: 378.1234.

4.15 Synthesis of 4-(2-acetoxy-4-oxo-4-(thiophen-2-yl)butan-2-yl)-3-butyl-2(5H)-

furanone **5b** (fjj-1-090)

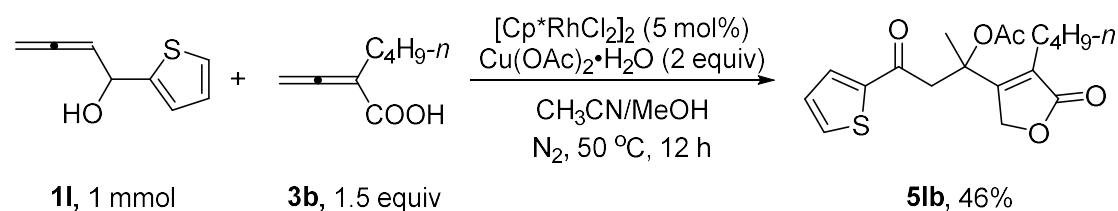

Following **Typical Procedure I**, the reaction of **1b** (152.4 mg, 1.0 mmol), **3b** (210.3 mg, 1.5 mmol), [Cp\*RhCl<sub>2</sub>]<sub>2</sub> (31.1 mg, 0.05 mmol), and Cu(OAc)<sub>2</sub>·H<sub>2</sub>O (399.2 mg, 2.0 mmol) in CH<sub>3</sub>CN (2.7 mL)/MeOH (0.13 mL) afforded **5b** (163.0 mg, 46%) as an oil [eluent: petroleum ether/ethyl acetate = 5/1 (1500 mL)]: <sup>1</sup>H NMR (300 MHz, CDCl<sub>3</sub>) δ 7.74 (d, *J* = 3.9 Hz, 1 H, ArH), 7.67 (d, *J* = 4.8 Hz, 1 H, ArH), 7.13 (t, *J* = 4.5 Hz, 1 H, ArH), 5.03 (d, *J* = 14.4 Hz, 1 H, one proton of OCH<sub>2</sub>), 4.98 (d, *J* = 14.4 Hz, 1 H, one proton of OCH<sub>2</sub>), 3.63 (d, *J* = 15.0 Hz, 1 H, one proton of CH<sub>2</sub>), 3.19 (d, *J* = 15.0 Hz, 1 H, one proton of CH<sub>2</sub>), 2.31 (t, *J* = 7.5 Hz, 2 H, CH<sub>2</sub>), 2.04 (s, 3 H, OAc), 1.63 (s, 3 H, CH<sub>3</sub>), 1.52-1.37 (m, 2 H, CH<sub>2</sub>), 1.37-1.22 (m, 2 H, CH<sub>2</sub>), 0.90 (t, *J* = 7.2 Hz, 3 H, CH<sub>3</sub>); <sup>13</sup>C NMR (75 MHz, CDCl<sub>3</sub>) δ 188.1, 171.5, 169.9, 157.0, 144.1, 134.8, 133.4, 131.7, 128.3, 84.9, 57.4, 45.7, 30.0, 25.3, 23.4, 22.3, 20.4; IR (neat) *v* (cm<sup>-1</sup>) 3094, 2958, 2929, 2872, 1747, 1667, 1651, 1519, 1455, 1417, 1362, 1227, 1109, 1051; MS (EI): *m/z* (%) 350 (M<sup>+</sup>, 7.34), 111 (100); HRMS Calcd for C<sub>18</sub>H<sub>22</sub>O<sub>5</sub>S (M<sup>+</sup>): 350.1188; Found: 350.1189.

4.16 Synthesis of 4-(2-acetoxy-4-oxodecan-2-yl)-3-allyl-2(5*H*)-furanone **5ad** (fjj-1-135, fjj-2-008)

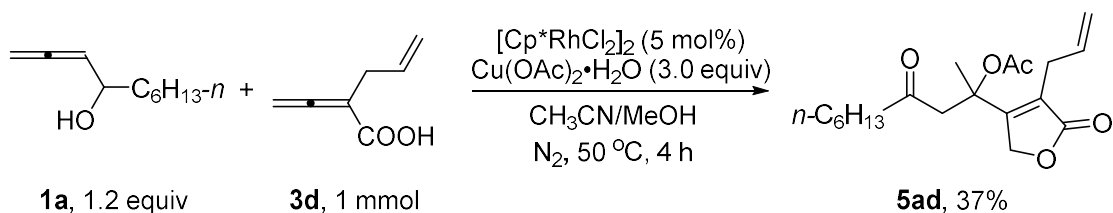

Following **Typical Procedure I**, the reaction of **1a** (185.0 mg, 1.2 mmol), **3d** (124.2 mg, 1.0 mmol),  $[\text{Cp}^*\text{RhCl}_2]_2$  (31.1 mg, 0.05 mmol), and  $\text{Cu}(\text{OAc})_2 \cdot \text{H}_2\text{O}$  (599.1 mg, 3.0 mmol) in  $\text{CH}_3\text{CN}$  (2.7 mL)/ $\text{MeOH}$  (0.13 mL) afforded **5ad** (126.0 mg, 37%) as an oil [eluent: petroleum ether/ethyl acetate = 5/1 (1000 mL)]:  $^1\text{H}$  NMR (300 MHz,  $\text{CDCl}_3$ )  $\delta$  5.91-5.72 (m, 1 H, =CH), 5.17-5.03 (m, 2 H, =CH<sub>2</sub>), 4.95 (s, 2 H, OCH<sub>2</sub>), 3.13-3.01 (m, 3 H, CH<sub>2</sub> and one proton of CH<sub>2</sub>), 2.77 (d,  $J$  = 15.0 Hz, 1 H, one proton of CH<sub>2</sub>), 2.44 (t,  $J$  = 7.4 Hz, 2 H, CH<sub>2</sub>), 2.10 (s, 3 H, OAc), 1.60-14.1 (m, 5 H, CH<sub>3</sub> and CH<sub>2</sub>), 1.37-1.15 (m, 6 H, CH<sub>2</sub> × 3), 0.87 (t,  $J$  = 6.8 Hz, 3 H, CH<sub>3</sub>);  $^{13}\text{C}$  NMR (75 MHz,  $\text{CDCl}_3$ )  $\delta$  206.4, 171.2, 169.8, 159.0, 132.7, 128.3, 116.6, 85.0, 57.4, 48.4, 44.5, 31.3, 28.4, 27.6, 25.1, 23.0, 22.2, 20.4, 13.8; IR (neat)  $\nu$  ( $\text{cm}^{-1}$ ) 3077, 2955, 2925, 2858, 1755, 1716, 1640, 1368, 1218, 1122, 1047; MS (EI):  $m/z$  (%) 336 ( $\text{M}^+$ , 1.10), 164 (100); HRMS Calcd for  $\text{C}_{19}\text{H}_{28}\text{O}_5$  ( $\text{M}^+$ ): 336.1937; Found: 336.1934.

4.17 Synthesis of 4-(2-acetoxy-4-oxodecan-2-yl)-3-phenethyl-2(5*H*)-furanone **5ae** (fjj-2-018)

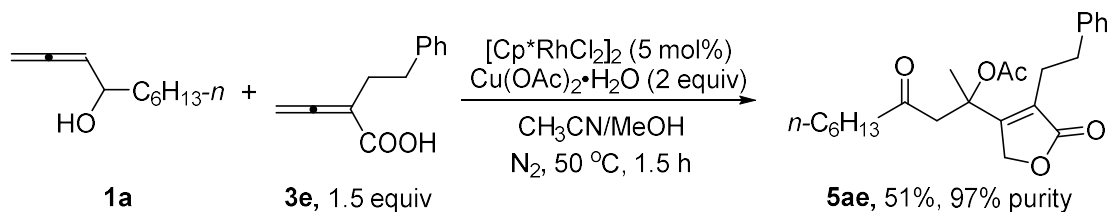

Following **Typical Procedure I**, the reaction of **1a** (154.0 mg, 1.0 mmol), **3e** (282.4 mg, 1.5 mmol),  $[\text{Cp}^*\text{RhCl}_2]_2$  (30.9 mg, 0.05 mmol), and  $\text{Cu}(\text{OAc})_2 \cdot \text{H}_2\text{O}$  (399.8 mg, 2.0 mmol) in  $\text{CH}_3\text{CN}$  (2.7 mL)/MeOH (0.13 mL) afforded **5ae** (210.2 mg, 51%, 97% purity) as an oil [eluent: petroleum ether/ethyl ether = 3/1 (1000 mL)]:  $^1\text{H}$  NMR (300 MHz,  $\text{CDCl}_3$ )  $\delta$  7.37-7.03 (m, 5 H, ArH), 4.57 (d,  $J = 14.4$  Hz, 1 H, one proton of  $\text{OCH}_2$ ), 4.46 (d,  $J = 14.1$  Hz, 1 H, one proton of  $\text{OCH}_2$ ), 2.93 (d,  $J = 15.0$  Hz, 1 H, one proton of  $\text{CH}_2$ ), 2.88-2.78 (m, 2 H,  $\text{CH}_2$ ), 2.74-2.57 (m, 3 H, one proton of  $\text{CH}_2$  and  $\text{CH}_2$ ), 2.42 (td,  $J_1 = 7.3$  Hz,  $J_2 = 2.1$  Hz, 2 H,  $\text{CH}_2$ ), 2.02 (s, 3 H, OAc), 1.57-1.37 (m, 5 H,  $\text{CH}_3$  and  $\text{CH}_2$ ), 1.36-1.16 (m, 6 H,  $\text{CH}_2 \times 3$ ), 0.87 (t,  $J = 6.8$  Hz, 3 H,  $\text{CH}_3$ );  $^{13}\text{C}$  NMR (75 MHz,  $\text{CDCl}_3$ )  $\delta$  206.4, 171.5, 169.7, 158.6, 140.5, 129.9, 128.6, 128.3, 126.2, 85.0, 57.0, 48.6, 44.5, 33.6, 31.5, 28.6, 25.8, 24.7, 23.1, 22.3, 20.5, 13.9; IR (neat)  $\nu$  ( $\text{cm}^{-1}$ ) 3063, 3027, 2931, 2859, 1748, 1712, 1601, 1496, 1455, 1368, 1220, 1047; MS (EI):  $m/z$  (%) 400 ( $\text{M}^+$ , 6.12), 91 (100); HRMS Calcd for  $\text{C}_{24}\text{H}_{32}\text{O}_5$  ( $\text{M}^+$ ): 400.2250; Found: 400.2248.

4.18 Synthesis of 4-(2-acetoxy-4-oxobutan-2-yl)-3-propyl-2(5H)-furanone **5ma** (fjj-2-023)

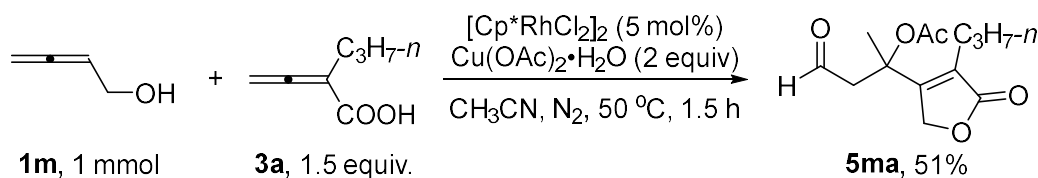

Following **Typical Procedure II**, the reaction of **1m** (70.3 mg, 1.0 mmol), **3a** (189.4 mg, 1.5 mmol),  $[\text{Cp}^*\text{RhCl}_2]_2$  (31.0 mg, 0.05 mmol), and  $\text{Cu}(\text{OAc})_2 \cdot \text{H}_2\text{O}$  (399.5 mg, 2.0 mmol) in  $\text{CH}_3\text{CN}$  (2.7 mL) afforded **5ma** (129.8 mg, 51%) as an oil [eluent:

petroleum ether/ethyl ether = 2/1 (1000 mL) to 1/1 (500 mL)]:  $^1\text{H}$  NMR (300 MHz,  $\text{CDCl}_3$ ) 9.63 (t,  $J = 2.4$  Hz, 1 H, CHO), 4.97 (d,  $J = 14.1$  Hz, 1 H, one proton of  $\text{OCH}_2$ ), 4.87 (d,  $J = 14.1$  Hz, 1 H, one proton of  $\text{OCH}_2$ ), 2.98 (dd,  $J_1 = 16.1$  Hz,  $J_2 = 2.3$  Hz, 1 H, one proton of  $\text{CH}_2$ ), 2.74 (dd,  $J_1 = 15.9$  Hz,  $J_2 = 2.4$  Hz, 1 H, one proton of  $\text{CH}_2$ ), 2.33 (t, 2 H,  $J = 7.5$  Hz,  $\text{CH}_2$ ), 2.11 (s, 3 H, OAc), 1.66-1.41 (m, 5 H,  $\text{CH}_2$  and  $\text{CH}_3$ ), 0.93 (t,  $J = 7.4$  Hz, 3 H,  $\text{CH}_3$ );  $^{13}\text{C}$  NMR (75 MHz,  $\text{CDCl}_3$ )  $\delta$  198.0, 171.1, 169.8, 156.9, 132.1, 84.4, 56.7, 49.2, 25.5, 24.7, 21.2, 20.3, 13.5; IR (neat)  $\nu$  ( $\text{cm}^{-1}$ ) 2964, 2929, 2875, 2744, 1747, 1676, 1455, 1368, 1222, 1136, 1064, 1030; MS (EI):  $m/z$  (%) 254 ( $\text{M}^+$ , 2.49), 43 (100); HRMS Calcd for  $\text{C}_{13}\text{H}_{18}\text{O}_5$  ( $\text{M}^+$ ): 254.1154; Found: 254.1156.

4.19 Synthesis of 4-(2-acetoxy-4-oxobutan-2-yl)-3-butyl-2(5*H*)-furanone **5mb** (fjj-2-001)

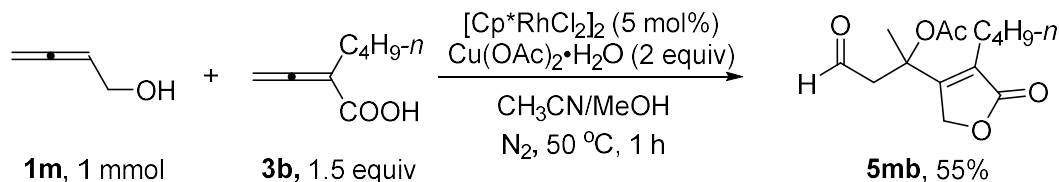

Following **Typical Procedure I**, the reaction of **1m** (70.2 mg, 1.0 mmol), **3b** (210.3 mg, 1.5 mmol),  $[\text{Cp}^*\text{RhCl}_2]_2$  (30.9 mg, 0.05 mmol), and  $\text{Cu(OAc)}_2 \cdot \text{H}_2\text{O}$  (399.1 mg, 2.0 mmol) in  $\text{CH}_3\text{CN}$  (2.7 mL)/ $\text{MeOH}$  (0.13 mL) afforded **5mb** (149.0 mg, 55%) as an oil [eluent: petroleum ether/ethyl ether = 4/1 (500 mL) to 2/1 (200 mL)]:  $^1\text{H}$  NMR (300 MHz,  $\text{CDCl}_3$ )  $\delta$  9.67-9.56 (m, 1 H, CHO), 5.02-4.80 (m, 2 H,  $\text{OCH}_2$ ), 3.03-2.90 (m, 1 H, one proton of  $\text{CH}_2$ ), 2.72 (dd,  $J_1 = 15.9$  Hz,  $J_2 = 2.1$  Hz, 1 H, one proton of  $\text{CH}_2$ ), 2.40-2.27 (m, 2 H,  $\text{CH}_2$ ), 2.14-2.03 (m, 3 H, OAc), 1.61-1.54 (m, 3 H,  $\text{CH}_3$ ), 1.54-1.42

(m, 2 H, CH<sub>2</sub>), 1.41-1.23 (m, 2 H, CH<sub>2</sub>), 0.97-0.86 (m, 3 H, CH<sub>3</sub>); <sup>13</sup>C NMR (75 MHz, CDCl<sub>3</sub>) δ 198.1, 171.2, 169.9, 156.6, 132.5, 84.4, 56.8, 49.3, 30.1, 24.7, 23.5, 22.4, 20.4, 13.6; IR (neat) ν (cm<sup>-1</sup>) 3480, 2959, 2925, 2873, 2745, 1748, 1674, 1455, 1380, 1227, 1137, 1032; MS (EI): *m/z* (%) 268 (M<sup>+</sup>, 4.24), 43 (100); HRMS Calcd for C<sub>14</sub>H<sub>20</sub>O<sub>5</sub> (M<sup>+</sup>): 268.1311; Found: 268.1311.

#### 4.20 Synthesis of 4-(2-acetoxy-4-oxobutan-2-yl)-3-(3-chloropropyl)-2(5*H*)-furanone.

##### 5mc (fjj-2-094)

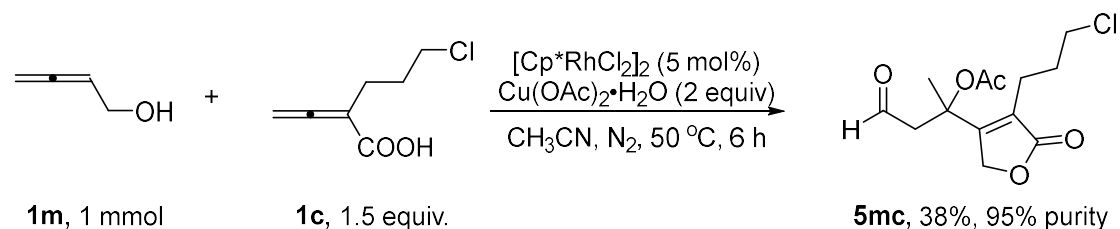

Following **Typical Procedure II**, the reaction of **1m** (69.3 mg, 1.0 mmol), **3c** (240.4 mg, 1.5 mmol), [Cp\*RhCl<sub>2</sub>]<sub>2</sub> (31.0 mg, 0.05 mmol), and Cu(OAc)<sub>2</sub>·H<sub>2</sub>O (399.3 mg, 2.0 mmol) in CH<sub>3</sub>CN (2.7 mL) afforded **5mc** (115.0 mg, 38%, 95% purity) as an oil [200~300 mesh silica gel, eluent: petroleum ether/ethyl ether = 5/1 (1000 mL) to 3/1 (500 mL), then 1/1 (1000 mL)]: <sup>1</sup>H NMR (300 MHz, CDCl<sub>3</sub>) δ 9.64 (d, *J* = 1.2 Hz, 1 H, CHO), 4.99 (d, *J* = 14.4 Hz, 1 H, one proton of OCH<sub>2</sub>), 4.89 (d, *J* = 14.1 Hz, 1 H, one proton of OCH<sub>2</sub>), 3.57 (t, *J* = 6.0 Hz, 2 H, CH<sub>2</sub>Cl), 3.02 (dd, *J*<sub>1</sub> = 16.2 Hz, *J*<sub>2</sub> = 1.5 Hz, 1 H, one proton of CH<sub>2</sub>), 2.77 (dd, *J*<sub>1</sub> = 16.2 Hz, *J*<sub>2</sub> = 2.1 Hz, 1 H, one proton of CH<sub>2</sub>), 2.62-2.46 (m, 2 H, CH<sub>2</sub>), 2.17-1.97 (m, 5 H, OAc and CH<sub>2</sub>), 1.57 (s, 3 H, CH<sub>3</sub>); <sup>13</sup>C NMR (75 MHz, CDCl<sub>3</sub>) δ 197.8, 171.0, 169.9, 158.0, 130.5, 84.6, 56.8, 49.0, 44.0,

29.9, 24.7, 21.1, 20.4; IR (neat)  $\nu$  (cm<sup>-1</sup>) 2963, 2933, 2852, 2746, 1747, 1680, 1446, 1369, 1306, 1223, 1134, 1064; MS (EI):  $m/z$  (%) 290 [M(<sup>37</sup>Cl)<sup>+</sup>, 0.2], 288 [M(<sup>35</sup>Cl)<sup>+</sup>, 0.6], 43 (100); HRMS Calcd for C<sub>13</sub>H<sub>17</sub>O<sub>5</sub><sup>35</sup>Cl (M<sup>+</sup>): 288.0765; Found: 288.0766.

#### 4.21 Synthesis of 4-(2-acetoxy-4-oxobutan-2-yl)-3-phenethyl-2(5*H*)-furanone **5me** (fjj-2-020)

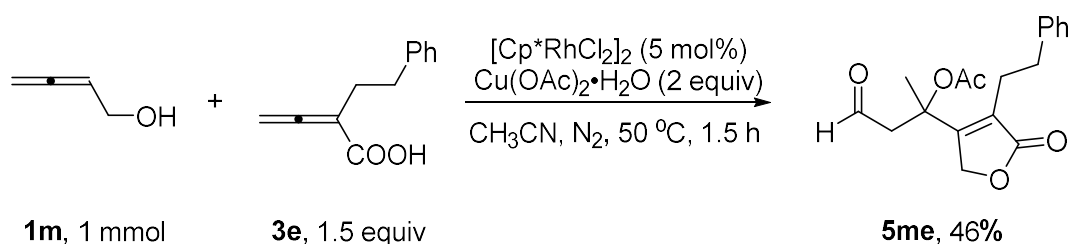

Following **Typical Procedure II**, the reaction of **1m** (69.7 mg, 1.0 mmol), **3e** (282.5 mg, 1.5 mmol), [Cp\*RhCl<sub>2</sub>]<sub>2</sub> (31.1 mg, 0.05 mmol), and Cu(OAc)<sub>2</sub>·H<sub>2</sub>O (399.3 mg, 2.0 mmol) in CH<sub>3</sub>CN (2.7 mL) afforded **5me** (145.5 mg, 46%) as an oil [eluent: petroleum ether/ethyl ether = 2/1 (1000 mL) to petroleum ether/ethyl acetate = 1/1 (500 mL)]: <sup>1</sup>H NMR (300 MHz, CDCl<sub>3</sub>)  $\delta$  9.53 (t,  $J$  = 2.4 Hz, 1 H, CHO), 7.33-7.06 (m, 5 H, ArH), 4.47 (d,  $J$  = 14.4 Hz, 1 H, one proton of OCH<sub>2</sub>), 4.30 (d,  $J$  = 14.1 Hz, 1 H, one proton of OCH<sub>2</sub>), 2.96-2.78 (m, 3 H, one proton of CH<sub>2</sub> and CH<sub>2</sub>), 2.76-2.52 (m, 3 H, one proton of CH<sub>2</sub> and CH<sub>2</sub>), 2.02 (s, 3 H, OAc), 1.46 (s, 3 H, CH<sub>3</sub>); <sup>13</sup>C NMR (75 MHz, CDCl<sub>3</sub>)  $\delta$  198.1, 171.0, 169.7, 158.0, 140.1, 130.7, 128.7, 128.5, 126.4, 84.6, 56.4, 49.4, 33.4, 25.8, 24.6, 20.4; IR (neat)  $\nu$  (cm<sup>-1</sup>) 3062, 3027, 2934, 2864, 2747, 1747, 1721, 1603, 1496, 1455, 1368, 1223, 1047; MS (EI):  $m/z$  (%) 316 (M<sup>+</sup>, 3.58), 91 (100); HRMS Calcd for C<sub>18</sub>H<sub>20</sub>O<sub>5</sub> (M<sup>+</sup>): 316.1311; Found: 316.1312.

## 5. A Gram Scale Reaction

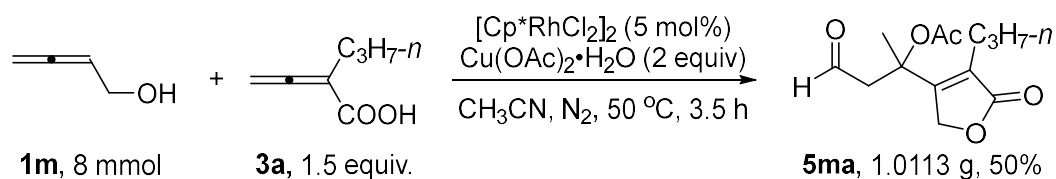

Following **Typical Procedure II**, the reaction of **1m** (559.7 mg, 8 mmol), **3a** (1514.2 mg, 12 mmol),  $[\text{Cp}^*\text{RhCl}_2]_2$  (0.2473 g, 0.4 mmol), and  $\text{Cu}(\text{OAc})_2 \cdot \text{H}_2\text{O}$  (3195.3 mg, 16 mmol) in  $\text{CH}_3\text{CN}$  (21.6 mL) afforded **5ma** (1.0113 g, 50%) as an oil [eluent: petroleum ether/ethyl acetate = 5/1 (2000 mL)]:  $^1\text{H}$  NMR (300 MHz,  $\text{CDCl}_3$ ) 9.63 (s, 1 H, CHO), 4.96 (d,  $J = 14.1$  Hz, 1 H, one proton of  $\text{OCH}_2$ ), 4.85 (d,  $J = 14.1$  Hz, 1 H, one proton of  $\text{OCH}_2$ ), 2.96 (d,  $J = 15.9$  Hz, 1 H, one proton of  $\text{CH}_2$ ), 2.71 (d,  $J = 15.9$  Hz, 1 H, one proton of  $\text{CH}_2$ ), 2.33 (t, 2 H,  $J = 7.5$  Hz,  $\text{CH}_2$ ), 2.11 (s, 3 H, OAc), 1.65-1.46 (m, 5 H,  $\text{CH}_2$  and  $\text{CH}_3$ ), 0.93 (t,  $J = 7.4$  Hz, 3 H,  $\text{CH}_3$ ).



## 6. Synthetic Applications

### 6.1 Preparation of 4-(2-acetoxy-6-ethoxy-6-oxohexan-2-yl)-3-propyl-2(5*H*)-furanone

**7** (fjj-4-017, 018)

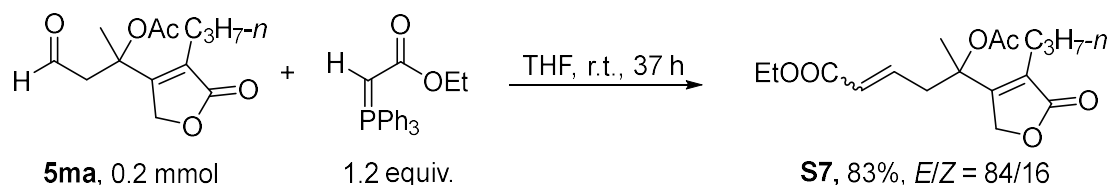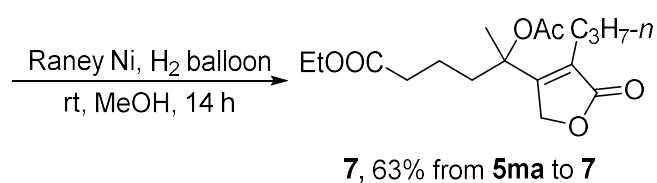

To a Schlenk tube was added ethyl (triphenylphosphoranylidene)acetate (83.9 mg, 0.24 mmol). After degassed under vacuum and backfilled with nitrogen for three times at room temperature, THF (1 mL) and **5ma** (50.1 mg, 0.2 mmol)/THF (0.5 mL) were added under nitrogen atmosphere. After being continuously stirred at room temperature for 37 h, the reaction was complete as monitored by thin layer chromatography (TLC). The reaction mixture was concentrated in vacuo and the crude residual was purified by chromatography on silica gel [eluent: petroleum ether/ethyl acetate = 5/1 (1000 mL)] to afford the corresponding alkenoate **S7** (53.3 mg, *E/Z* = 84/16, 83%).

A Schlenk tube was degassed under vacuum and backfilled with nitrogen for three times at room temperature. Then Raney Ni (5 mg, *Note*: commercial product nickel from *Aladdin* is stabilized with water) was added and washed with MeOH for three times to remove water. Then the Schlenk tube was degassed under vacuum and backfilled with hydrogen for three times, which was followed by the addition of the

above prepared alkenoate **S7** /MeOH (2 mL) under hydrogen atmosphere. After being continuously stirred at room temperature for 14 h, the reaction was complete as monitored by thin layer chromatography (TLC). After filtration through a short column of Celite® pad eluted with ethyl acetate (20 mL × 3), the combined filtrate was concentrated in vacuo and the crude residual was purified by chromatography on silica gel (200~300 mesh) [eluent: petroleum ether/ethyl acetate = 8/1 (600 mL)] to afford **7** (40.7 mg, 63% from two steps) as an oil: <sup>1</sup>H NMR (300 MHz, CDCl<sub>3</sub>) δ 4.91 (d, *J* = 14.1 Hz, 1 H, one proton of OCH<sub>2</sub>), 4.85 (d, *J* = 14.4 Hz, 1 H, one proton of OCH<sub>2</sub>), 4.12 (q, *J* = 7.2 Hz, 2 H, OCH<sub>2</sub>), 2.41-2.20 (m, 4 H, CH<sub>2</sub> × 2), 2.13 (s, 3 H, CH<sub>3</sub>), 1.98-1.70 (m, 2 H, CH<sub>2</sub>), 1.65-1.35 (m, 7 H, CH<sub>2</sub> × 2 and CH<sub>3</sub>), 1.25 (t, *J* = 7.1 Hz, 3 H, CH<sub>3</sub>), 0.93 (t, *J* = 7.4 Hz, 3 H, CH<sub>3</sub>); <sup>13</sup>C NMR (75 MHz, CDCl<sub>3</sub>) δ 172.8, 172.1, 170.1, 157.4, 131.7, 87.0, 60.3, 57.1, 36.7, 33.6, 25.6, 24.4, 21.5, 20.5, 18.5, 14.1, 13.7; IR (neat)  $\nu$  (cm<sup>-1</sup>) 2963, 2935, 2874, 1748, 1456, 1372, 1222, 1028; MS (EI): *m/z* (%) 326 (M<sup>+</sup>, 23.9), 151 (100); HRMS Calcd for C<sub>17</sub>H<sub>26</sub>O<sub>6</sub> (M)<sup>+</sup>: 326.1729; Found: 326.1730.

## 6.2 Preparation of 4-(2-acetoxy-4-hydroxybutan-2-yl)-3-propyl-2(5*H*)-furanone **8**<sup>4</sup> (fjj-2-090)

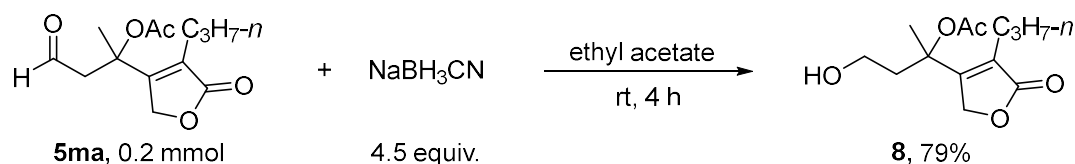

To a dry Schlenk tube were added **5ma** (49.6 mg, 0.2 mmol) and ethyl acetate (2 mL). Sodium cyanoborohydride (57.4 mg, 4.5 mmol) was added in three portions (13.2

mg, 14.2 mg, and 30.0 mg) every hour. After being continuously stirred at room temperature for 4 h, the reaction was complete as monitored by thin layer chromatography (TLC). After filtration through a short column of silica gel eluted with ethyl acetate (20 mL  $\times$  3), the combined filtrate was concentrated in vacuo and the crude residual was purified by chromatography on silica gel (200~300 mesh) [eluent: petroleum ether/ethyl acetate = 2/1 (1500 mL)] to afford **8** (39.5 mg, 79%) as an oil:  $^1\text{H}$  NMR (300 MHz,  $\text{CDCl}_3$ )  $\delta$  4.92 (s, 2 H,  $\text{OCH}_2$ ), 3.73-3.48 (m, 2 H,  $\text{OCH}_2$ ), 2.31 (t,  $J = 7.4$  Hz, 2 H,  $\text{CH}_2$ ), 2.23-1.93 (m, 6 H,  $\text{CH}_3$ ,  $\text{CH}_2$ , and OH), 1.64-1.42 (m, 5 H,  $\text{CH}_2$  and  $\text{CH}_3$ ), 0.93 (t,  $J = 7.4$  Hz, 3 H,  $\text{CH}_3$ );  $^{13}\text{C}$  NMR (75 MHz,  $\text{CDCl}_3$ )  $\delta$  172.3, 170.2, 158.6, 130.9, 86.3, 57.6, 57.5, 39.8, 25.6, 24.7, 21.4, 20.6, 13.7; IR (neat)  $\nu$  ( $\text{cm}^{-1}$ ) 3478, 2963, 2934, 2875, 1747, 1674, 1455, 1379, 1367, 1122, 1138, 1053, 1031; MS (EI):  $m/z$  (%) 256 ( $\text{M}^+$ , 4.51), 43 (100); HRMS Calcd for  $\text{C}_{13}\text{H}_{20}\text{O}_5$  ( $\text{M}^+$ ): 256.1311; Found: 256.1312.

6.3 Preparation of 4-(4-hydroxy-2-methyloxetan-2-yl)-3-propyl-2(5*H*)-furanone **9**. (fjj-2-098, fjj-2-162)

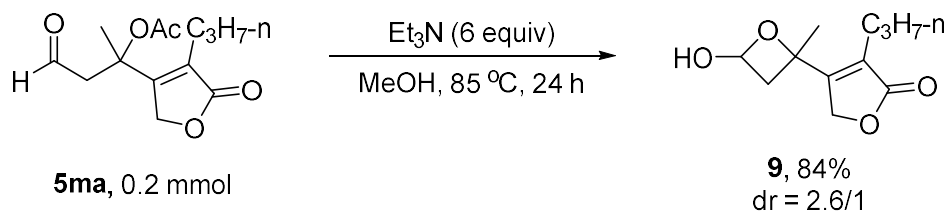

To a dry Schlenk tube were added **5ma** (51.1 mg, 0.2 mmol), MeOH (4 mL), and Et<sub>3</sub>N (166  $\mu\text{L}$ , 1.2 mmol) sequentially. After being continuously stirred at 85 °C for 24

h, the reaction was complete as monitored by thin layer chromatography (TLC). After filtration through a short column of silica gel eluted with ethyl acetate (20 mL  $\times$  3), the combined filtrate was then concentrated in vacuo and the crude residual was purified by chromatography on silica gel (200~300 mesh) [eluent: petroleum ether/ethyl acetate = 5/1 (300 mL) to 3/1 (500 mL)] to afford **9** (35.7 mg, 84%, dr = 2.6:1) as an oil:  $^1\text{H}$  NMR (600 MHz,  $\text{CDCl}_3$ )  $\delta$  [5.43 (t,  $J$  = 4.2 Hz, 0.67 H), 5.12-5.05 (m, 0.27 H), OCHO], [4.73 (d,  $J$  = 13.8 Hz, 0.27 H), 4.64 (d,  $J$  = 12.6 Hz, 0.72 H), one proton of  $\text{OCH}_2$ ], [4.44 (d,  $J$  = 12.0 Hz, 0.72 H), 4.28 (d,  $J$  = 14.4 Hz, 0.28 H), one proton of  $\text{OCH}_2$ ], [3.00 (d,  $J$  = 6.0 Hz, 0.22 H), 2.74-2.65 (m, 0.59 H), OH], [2.54 (dd,  $J_1$  = 15.0 Hz,  $J_2$  = 3.0 Hz, 0.28 H), 2.46 (d,  $J$  = 13.2 Hz, 0.70 H), one proton of  $\text{CH}_2$ ], 2.33-2.19 (m, 2 H,  $\text{CH}_2$ ), [1.94-1.84 (m, 0.7 H, one proton of  $\text{CH}_2$ ), 1.74-1.66 (m, 2.38 H,  $\text{CH}_3$  and one proton of  $\text{CH}_2$ ), 1.64-1.47 (m, 3.94 H,  $\text{CH}_3$  and  $\text{CH}_2$ )], 0.91 (t,  $J$  = 7.5 Hz, 3 H,  $\text{CH}_3$ ); IR (neat)  $\nu$  ( $\text{cm}^{-1}$ ) 3419, 2962, 2929, 2873, 1751, 1732, 1457, 1337, 1212, 1188, 1062, 1004; MS (EI):  $m/z$  (%) 212 ( $\text{M}^+$ , 3.1), 43 (100); HRMS Calcd for  $\text{C}_{11}\text{H}_{16}\text{O}_4$  ( $\text{M}^+$ ): 212.1049; Found: 212.1050.

#### 6.5 Preparation of 4-(2,4-dihydroxybutan-2-yl)-3-propyl-2(5*H*)-furanone **10**. (fjj-2-180)

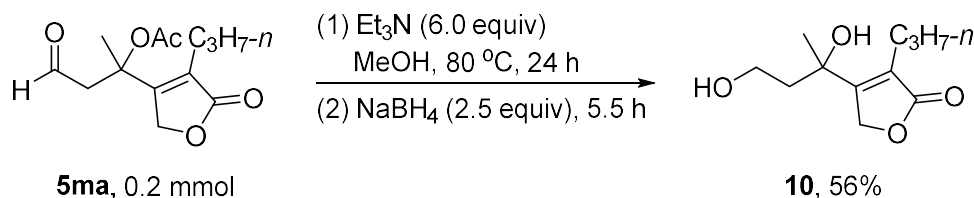

To a dry Schlenk tube were added **5ma** (51.0 mg, 0.2 mmol),  $\text{MeOH}$  (4 mL), and

Et<sub>3</sub>N (166 μL, 1.2 mmol) sequentially. After being continuously stirred at 80 °C for 24 h, the resulting mixture was cooled to room temperature and treated with NaBH<sub>4</sub> (19.0 mg, 0.5 mmol). After being continuously stirred at room temperature for 5.5 h, the reaction was complete as monitored by thin layer chromatography (TLC). After filtration through a short column of silica gel eluted with ethyl acetate (10 mL × 3), the combined filtrate was then concentrated in vacuo and the crude residual was purified by chromatography on silica gel (200~300 mesh) [eluent: dichloromethane/ methanol = 50/1 (800 mL)] to afford **10** (24.2 mg, 56%) as an oil: <sup>1</sup>H NMR (300 MHz, CDCl<sub>3</sub>) 4.62 (d, *J* = 14.1 Hz, 1 H, one proton of OCH<sub>2</sub>), 4.29 (d, *J* = 14.1 Hz, 2 H, one proton of OCH<sub>2</sub> and OH), 3.76-3.58 (m, 1 H, one proton of CH<sub>2</sub>), 3.47 (t, *J* = 10.5 Hz, 1 H, one proton of CH<sub>2</sub>), 3.18 (bs, 1 H, OH), 2.39-2.08 (m, 4 H, CH<sub>2</sub> × 2), 1.70-1.36 (m, 5 H, CH<sub>2</sub> and CH<sub>3</sub>), 0.91 (t, *J* = 7.5 Hz, 3 H, CH<sub>3</sub>); <sup>13</sup>C NMR (75 MHz, CDCl<sub>3</sub>) δ 173.4, 164.6, 128.2, 86.3, 56.8, 56.5, 39.7, 25.4, 25.0, 21.5, 13.7; IR (neat) ν (cm<sup>-1</sup>) 3428, 2962, 2929, 2874, 1729, 1668, 1456, 1379, 1315, 1181, 1136, 1051; MS (EI): *m/z* (%) 214 (M<sup>+</sup>, 5.1), 43 (100); HRMS Calcd for C<sub>11</sub>H<sub>18</sub>O<sub>4</sub> (M<sup>+</sup>): 214.1205; Found: 214.1207.

#### 6.4 Preparation of 4-(β-methyl-β-lactonyl)-3-propyl-2(5*H*)-furanone **11**<sup>5</sup> (fjj-4-014)

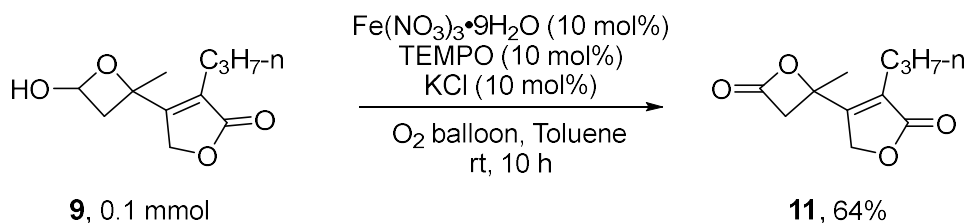

A dry Schlenk tube containing Fe(NO<sub>3</sub>)<sub>3</sub>·9H<sub>2</sub>O (3.9 mg, 0.01 mmol), TEMPO (1.5

mg, 0.01 mmol), and KCl (0.9 mg, 0.01 mmol) was degassed under vacuum and backfilled with oxygen for three times. Then **9** (22.1 mg, 0.1 mmol) and toluene (0.5 mL) were added under oxygen atmosphere sequentially. After being continuously stirred at room temperature for 10 h, the reaction was complete as monitored by thin layer chromatography (TLC). After filtration through a short column of silica gel eluted with ethyl acetate (20 mL  $\times$  3), the combined filtrate was concentrated in vacuo and the crude residual was purified by chromatography on silica gel (200~300 mesh) [eluent: petroleum ether/ethyl acetate = 5/1 (600 mL)] to afford **11** (14.1 mg, 64%) as an oil:  $^1\text{H}$  NMR (300 MHz,  $\text{CDCl}_3$ ) 5.31 (d,  $J = 15.6$  Hz, 1 H, one proton of  $\text{OCH}_2$ ), 5.18 (d,  $J = 15.3$  Hz, 1 H, one proton of  $\text{OCH}_2$ ), 3.26 (d,  $J = 16.8$  Hz, 1 H, one proton of  $\text{CH}_2$ ), 2.65 (d,  $J = 17.1$  Hz, 1 H, one proton of  $\text{CH}_2$ ), 2.45-2.15 (m, 2 H,  $\text{CH}_2$ ), 1.73-1.47 (m, 5 H,  $\text{CH}_2$  and  $\text{CH}_3$ ), 0.93 (t,  $J = 7.4$  Hz, 3 H,  $\text{CH}_3$ );  $^{13}\text{C}$  NMR (75 MHz,  $\text{CDCl}_3$ )  $\delta$  171.0, 165.7, 153.6, 127.9, 79.6, 63.5, 44.2, 25.7, 23.4, 21.0, 13.6; IR (neat)  $\nu$  ( $\text{cm}^{-1}$ ) 2963, 2934, 2874, 1747, 1457, 1384, 1310, 1238, 1182, 1115, 1061, 1035; MS (EI):  $m/z$  (%) 210 ( $\text{M}^+$ , 15.0), 167 (100); HRMS Calcd for  $\text{C}_{11}\text{H}_{14}\text{O}_4$  ( $\text{M}^+$ ): 210.0892; Found: 210.0893.

## 7. References

1. Luo, H.; Ma, S. *Eur. J. Org. Chem.* **2013**, 3041.
2. (a) Miao, B.; Li, G.; Ma, S. *Chem. Eur.J.* **2015**, *21*, 17224; (b) Castellano, S.; Fiji, H. D. G.; Kinderman, S. S.; Watanabe, M.; de Leon, P.; Tamanoi, F.; Kwon, O. *J. Am. Chem. Soc.* **2007**, *129*, 5843.
3. Fan, J.; Fu, C.; Wu, X.; Ma, S. *Chem. Commun.* **2021**, *57*, 10411.
4. Zeynizadeh, B.; Kouhkan, M. *J. Chin. Chem. Soc.* **2018**, *65*, 1521.
5. Liu, J.; Xie, X.; Ma, S. *Synthesis* **2012**, *44*, 1569.

## 8. $^1\text{H}$ NMR, $^{13}\text{C}$ NMR, and $^{19}\text{F}$ NMR Spectra of the Compounds



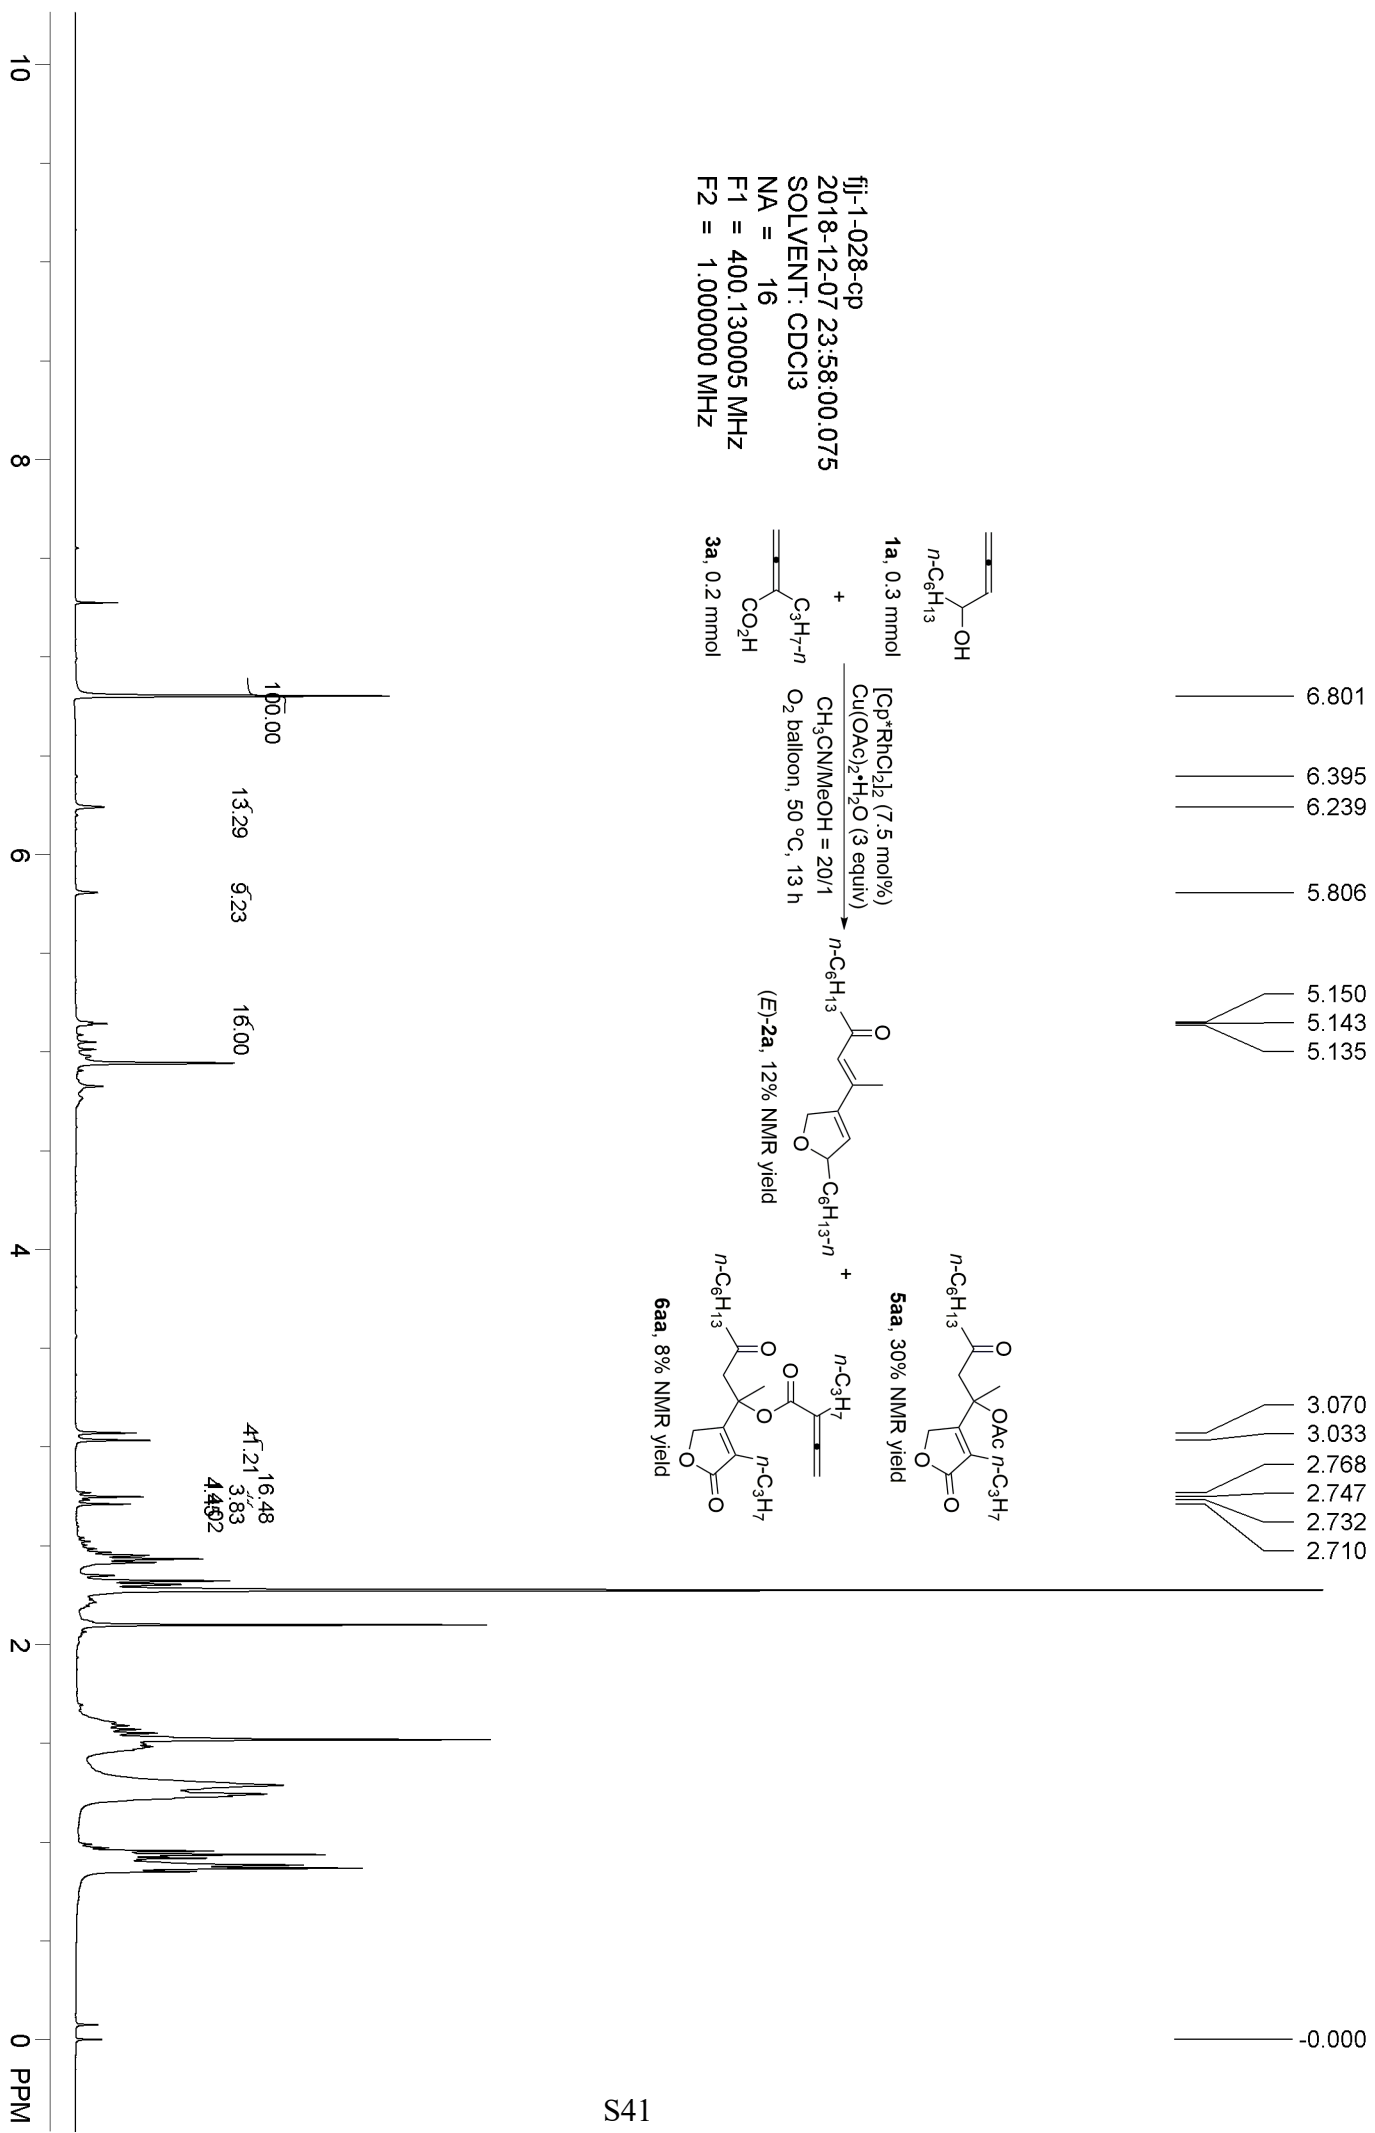

3.070  
3.033

2.768  
2.747  
2.732  
2.710

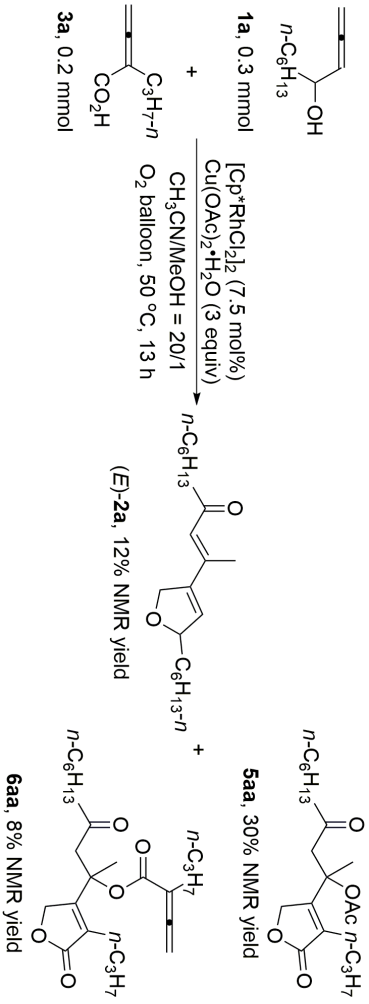

fj-1-028-cp  
2018-12-07 23:58:00.075  
SOLVENT: CDCl3  
NA = 16  
F1 = 400.130005 MHz  
F2 = 1.000000 MHz

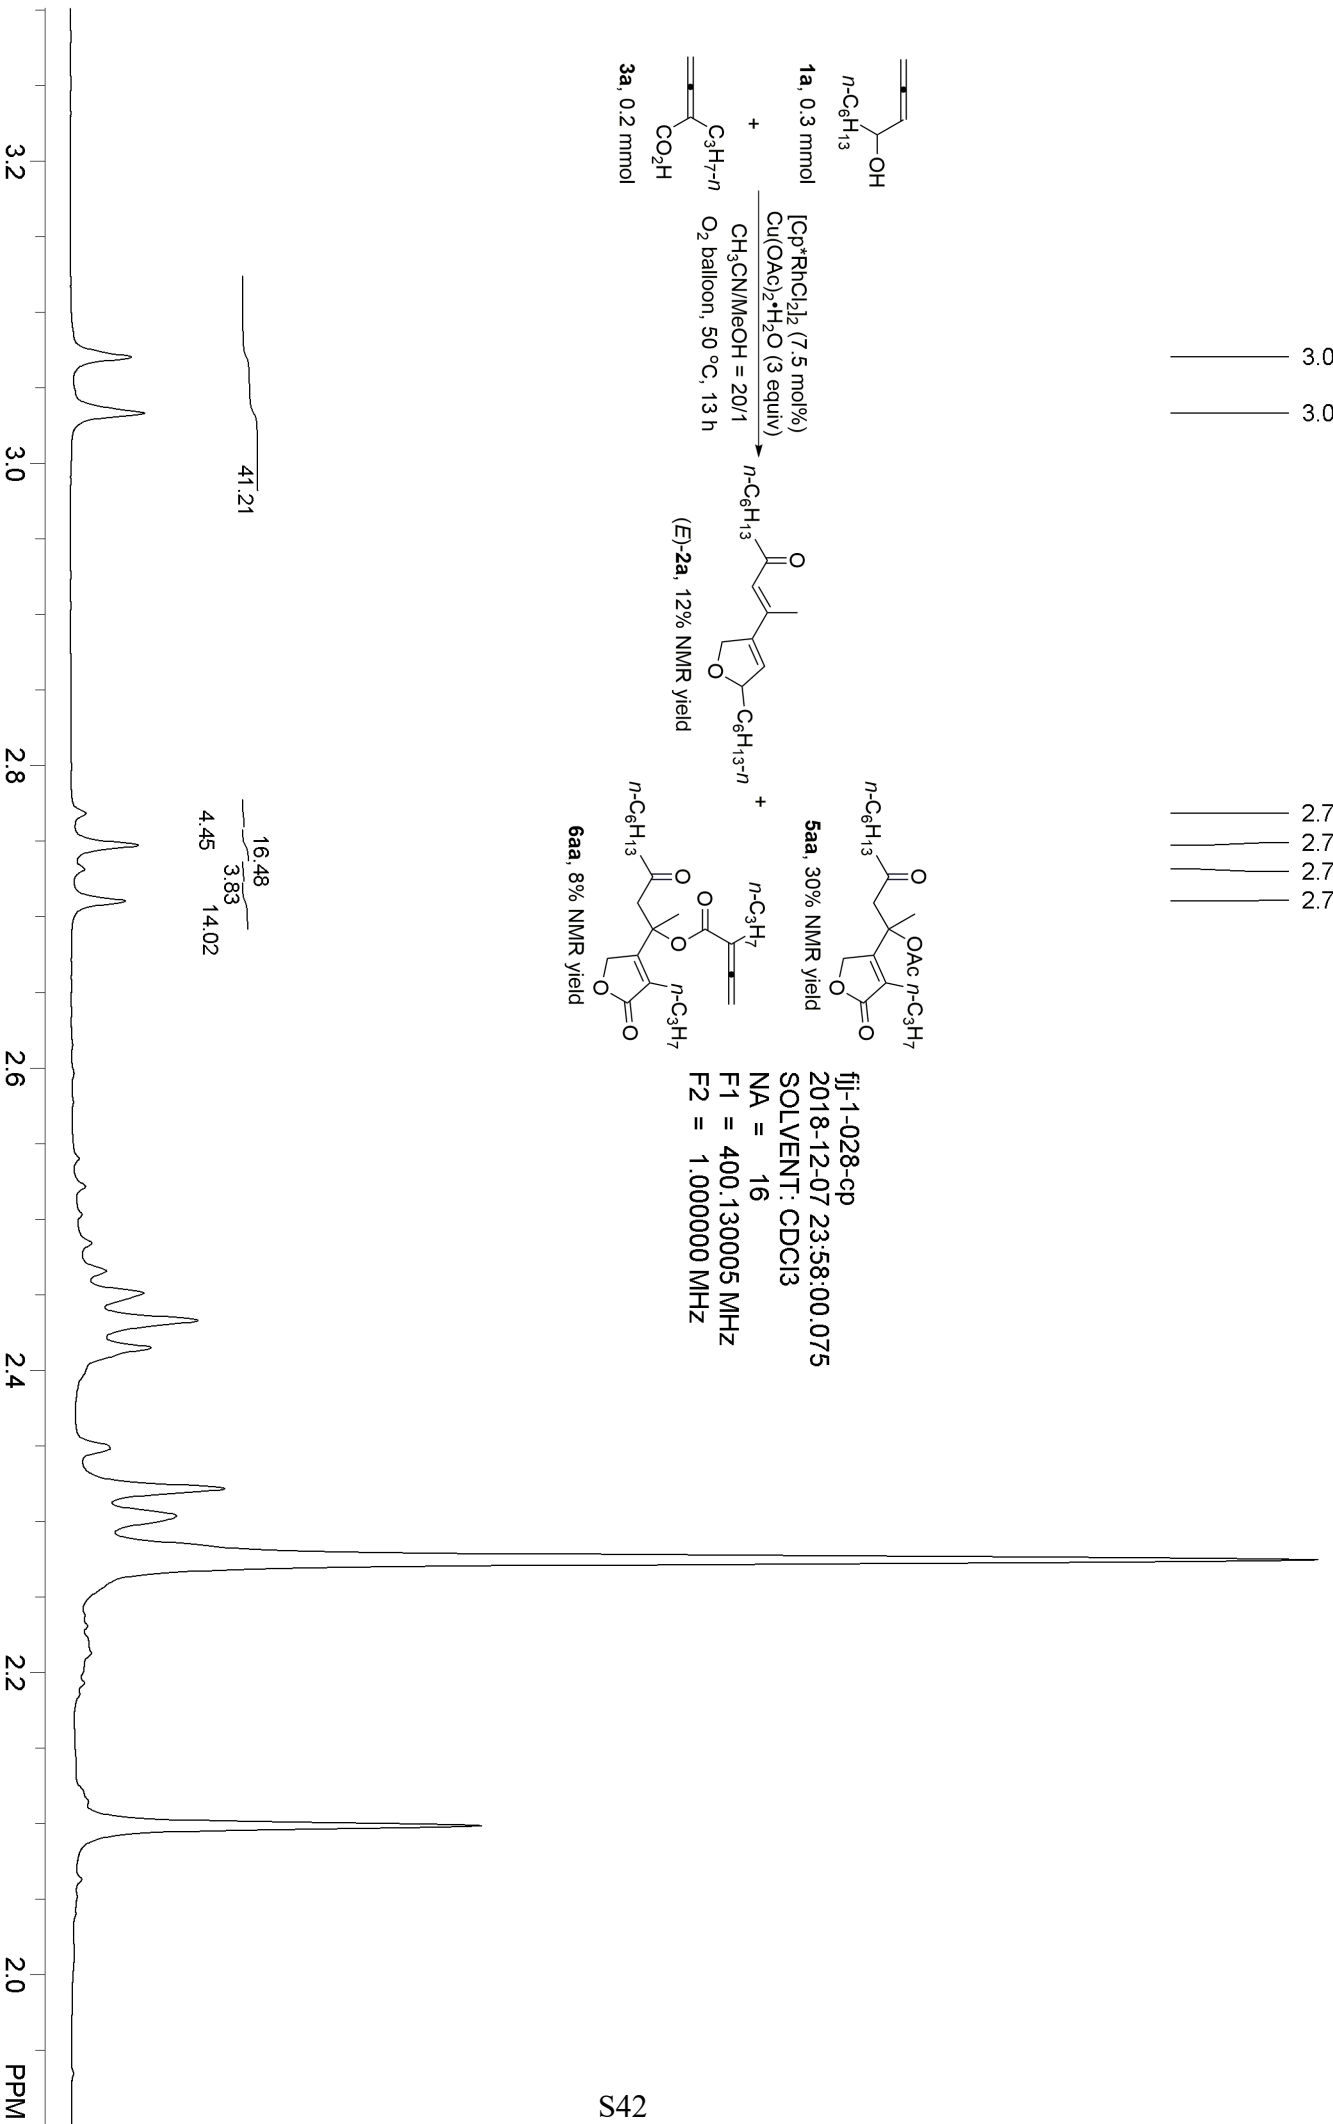



fj-2-103-1  
2019-10-23 13:08:08.000  
SOLVENT: CDCl3  
NA = 1610  
F1 = 75.467751 MHz  
F2 = 1.000000 MHz

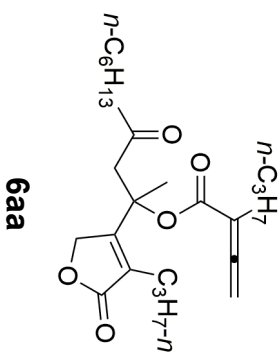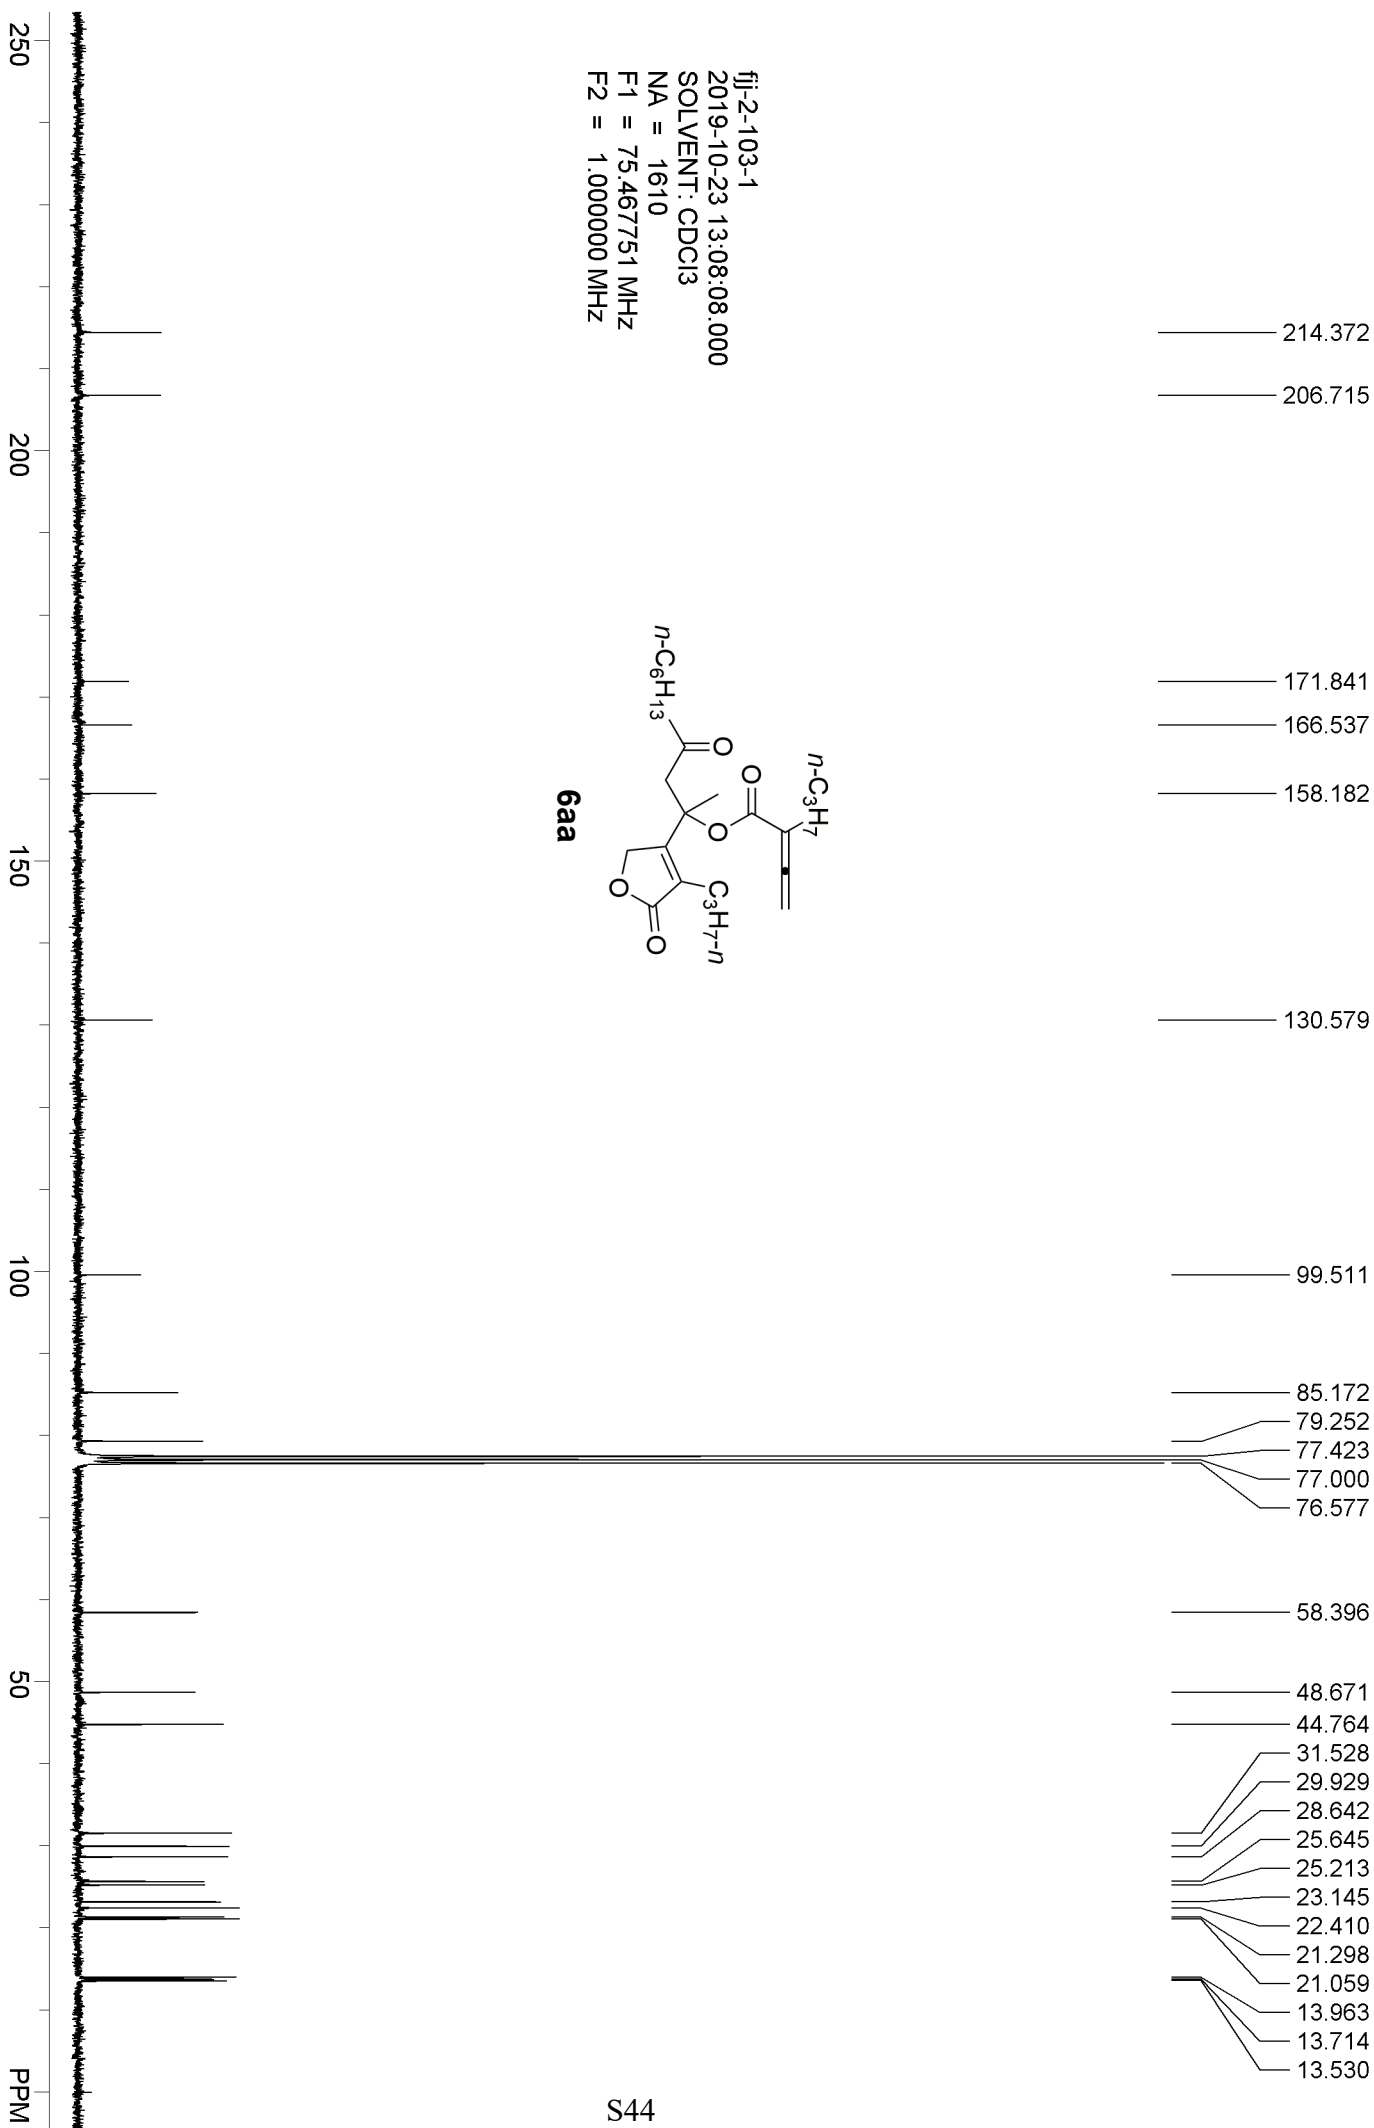

fil-2-103-2  
2019-10-23 09:53:41.640  
SOLVENT: CDCl3  
NA = 8  
F1 = 300.130005 MHz  
F2 = 1.000000 MHz

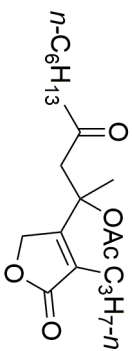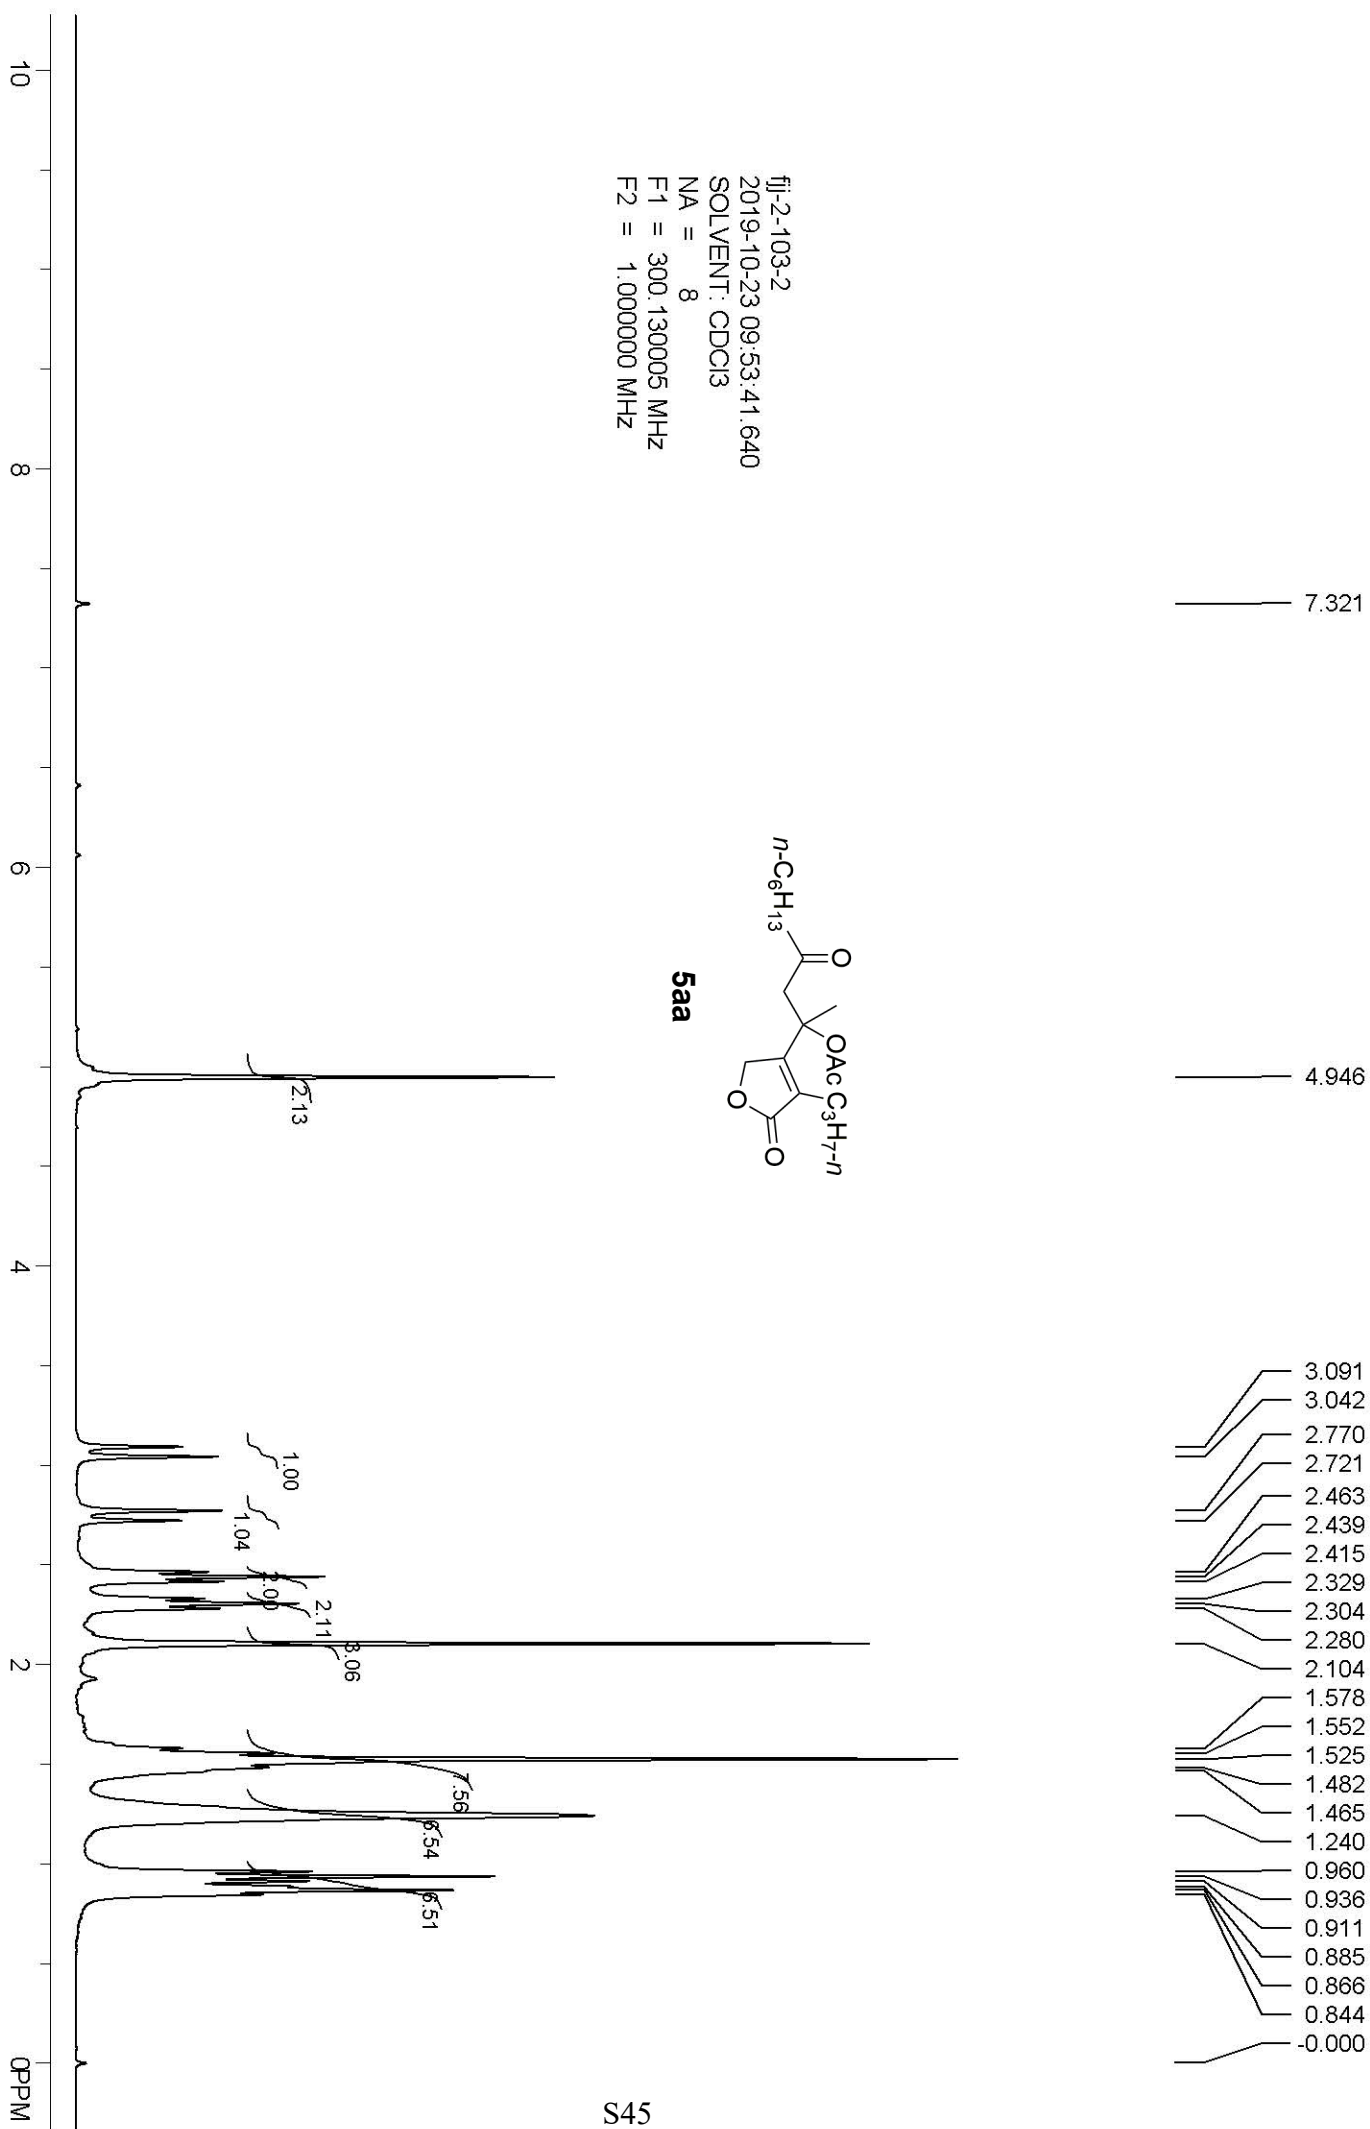

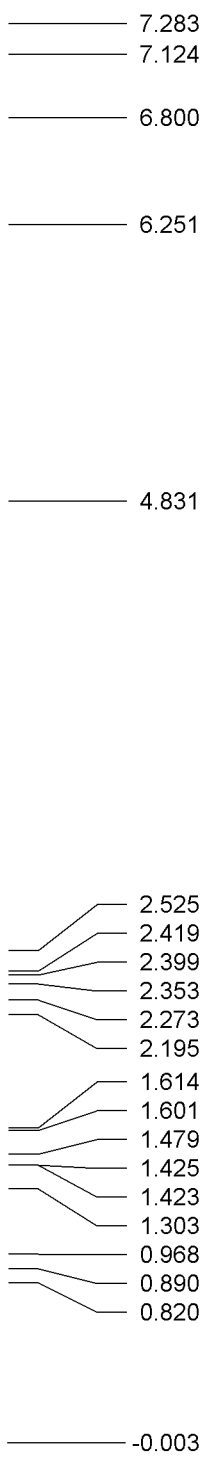

fj-2-042cp  
2019-07-12 10:21:47.250  
SOLVENT: CDCl3  
NA = 8  
F1 = 300.130005 MHz  
F2 = 1.000000 MHz

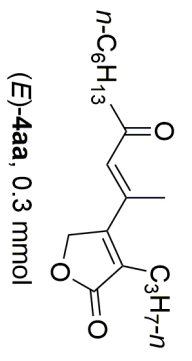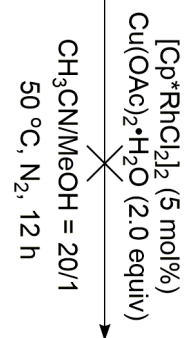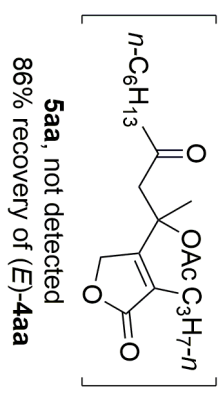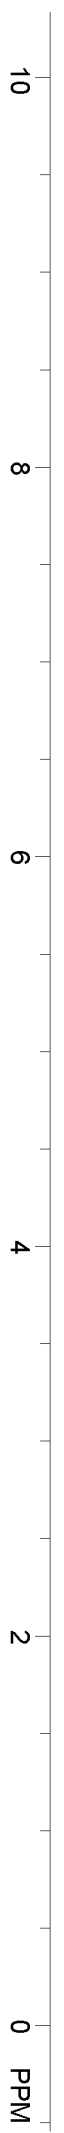

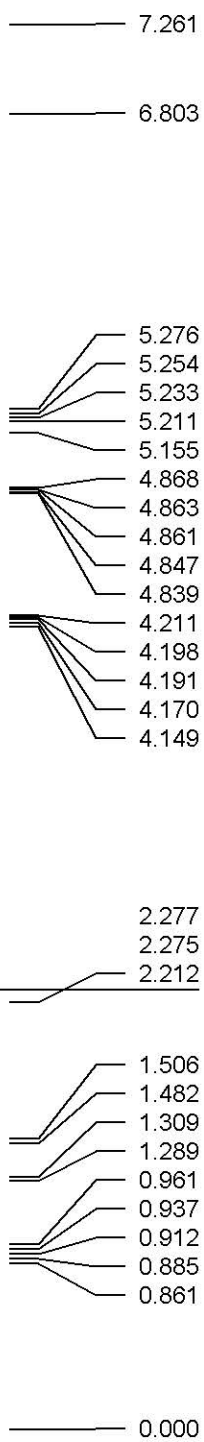

fj-2-026cp  
 2019-07-02 09:59:00.781  
 SOLVENT: CDCl3  
 NA = 8  
 F1 = 300.130005 MHz  
 F2 = 1.000000 MHz

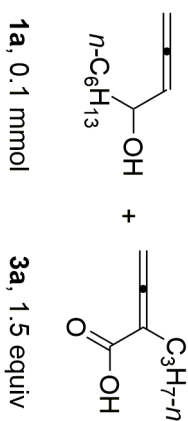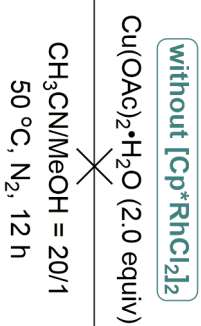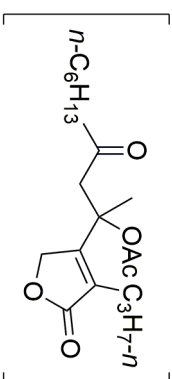

**5aa**, not detected  
 71% recovery of **1a**  
 67% recovery of **3a**

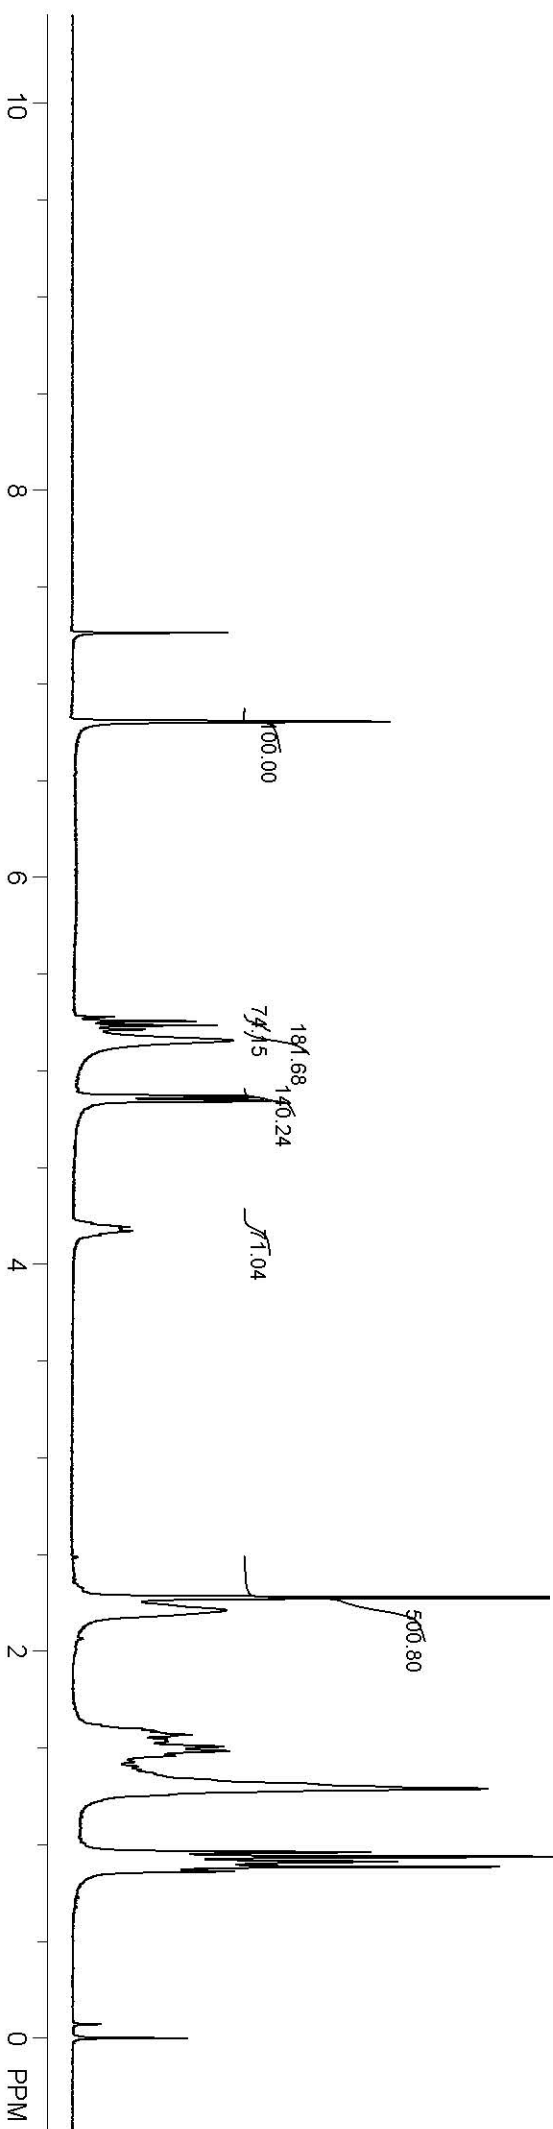

fj-7-194cp  
 2023-05-13 16:02:56.949  
 SOLVENT: CDCl3  
 NA = 8  
 F1 = 300.130005 MHz  
 F2 = 1.000000 MHz

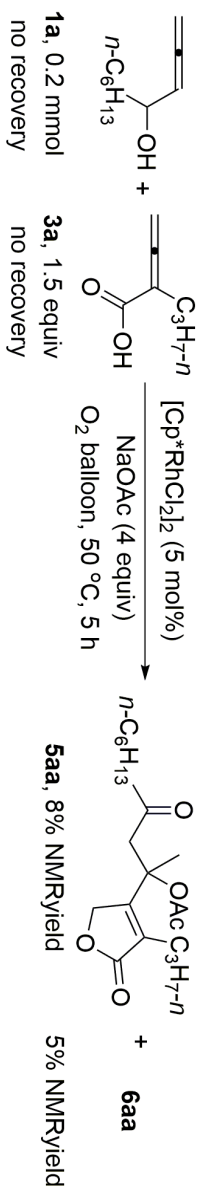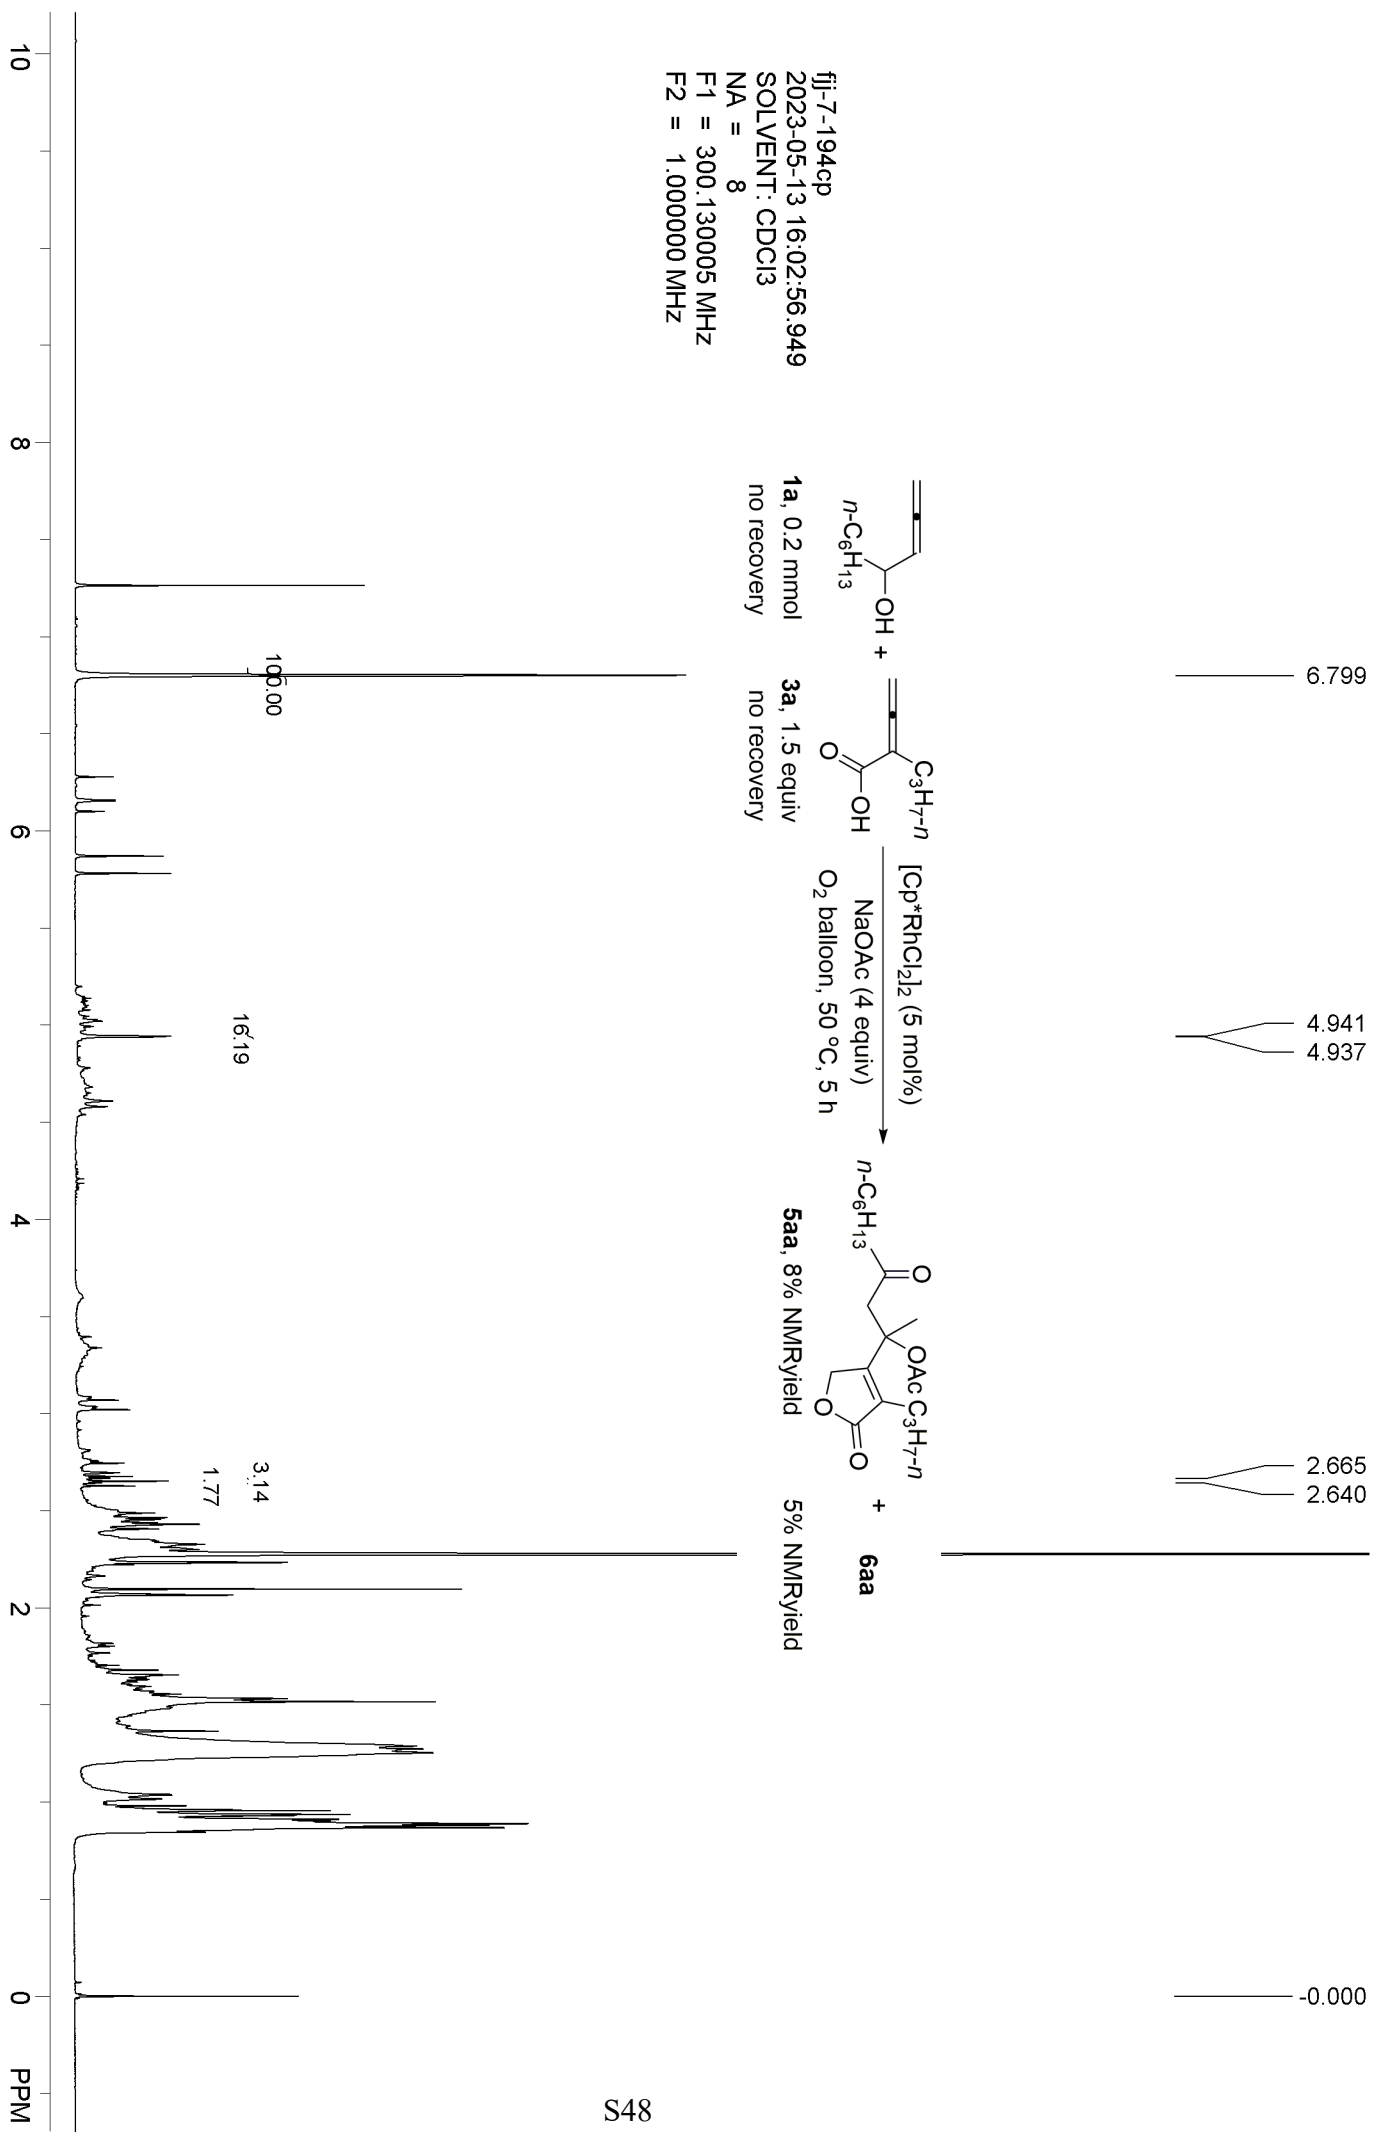



fj-7-195cp  
 2023-05-13 16:07:39.783  
 SOLVENT: CDCl3  
 NA = 8  
 F1 = 300.130005 MHz  
 F2 = 1.000000 MHz

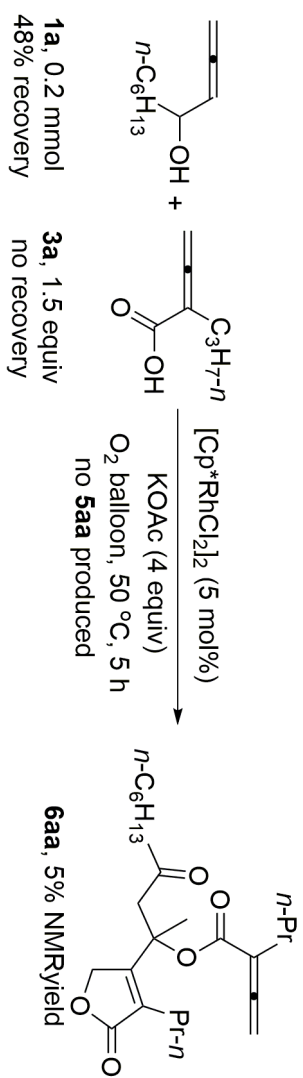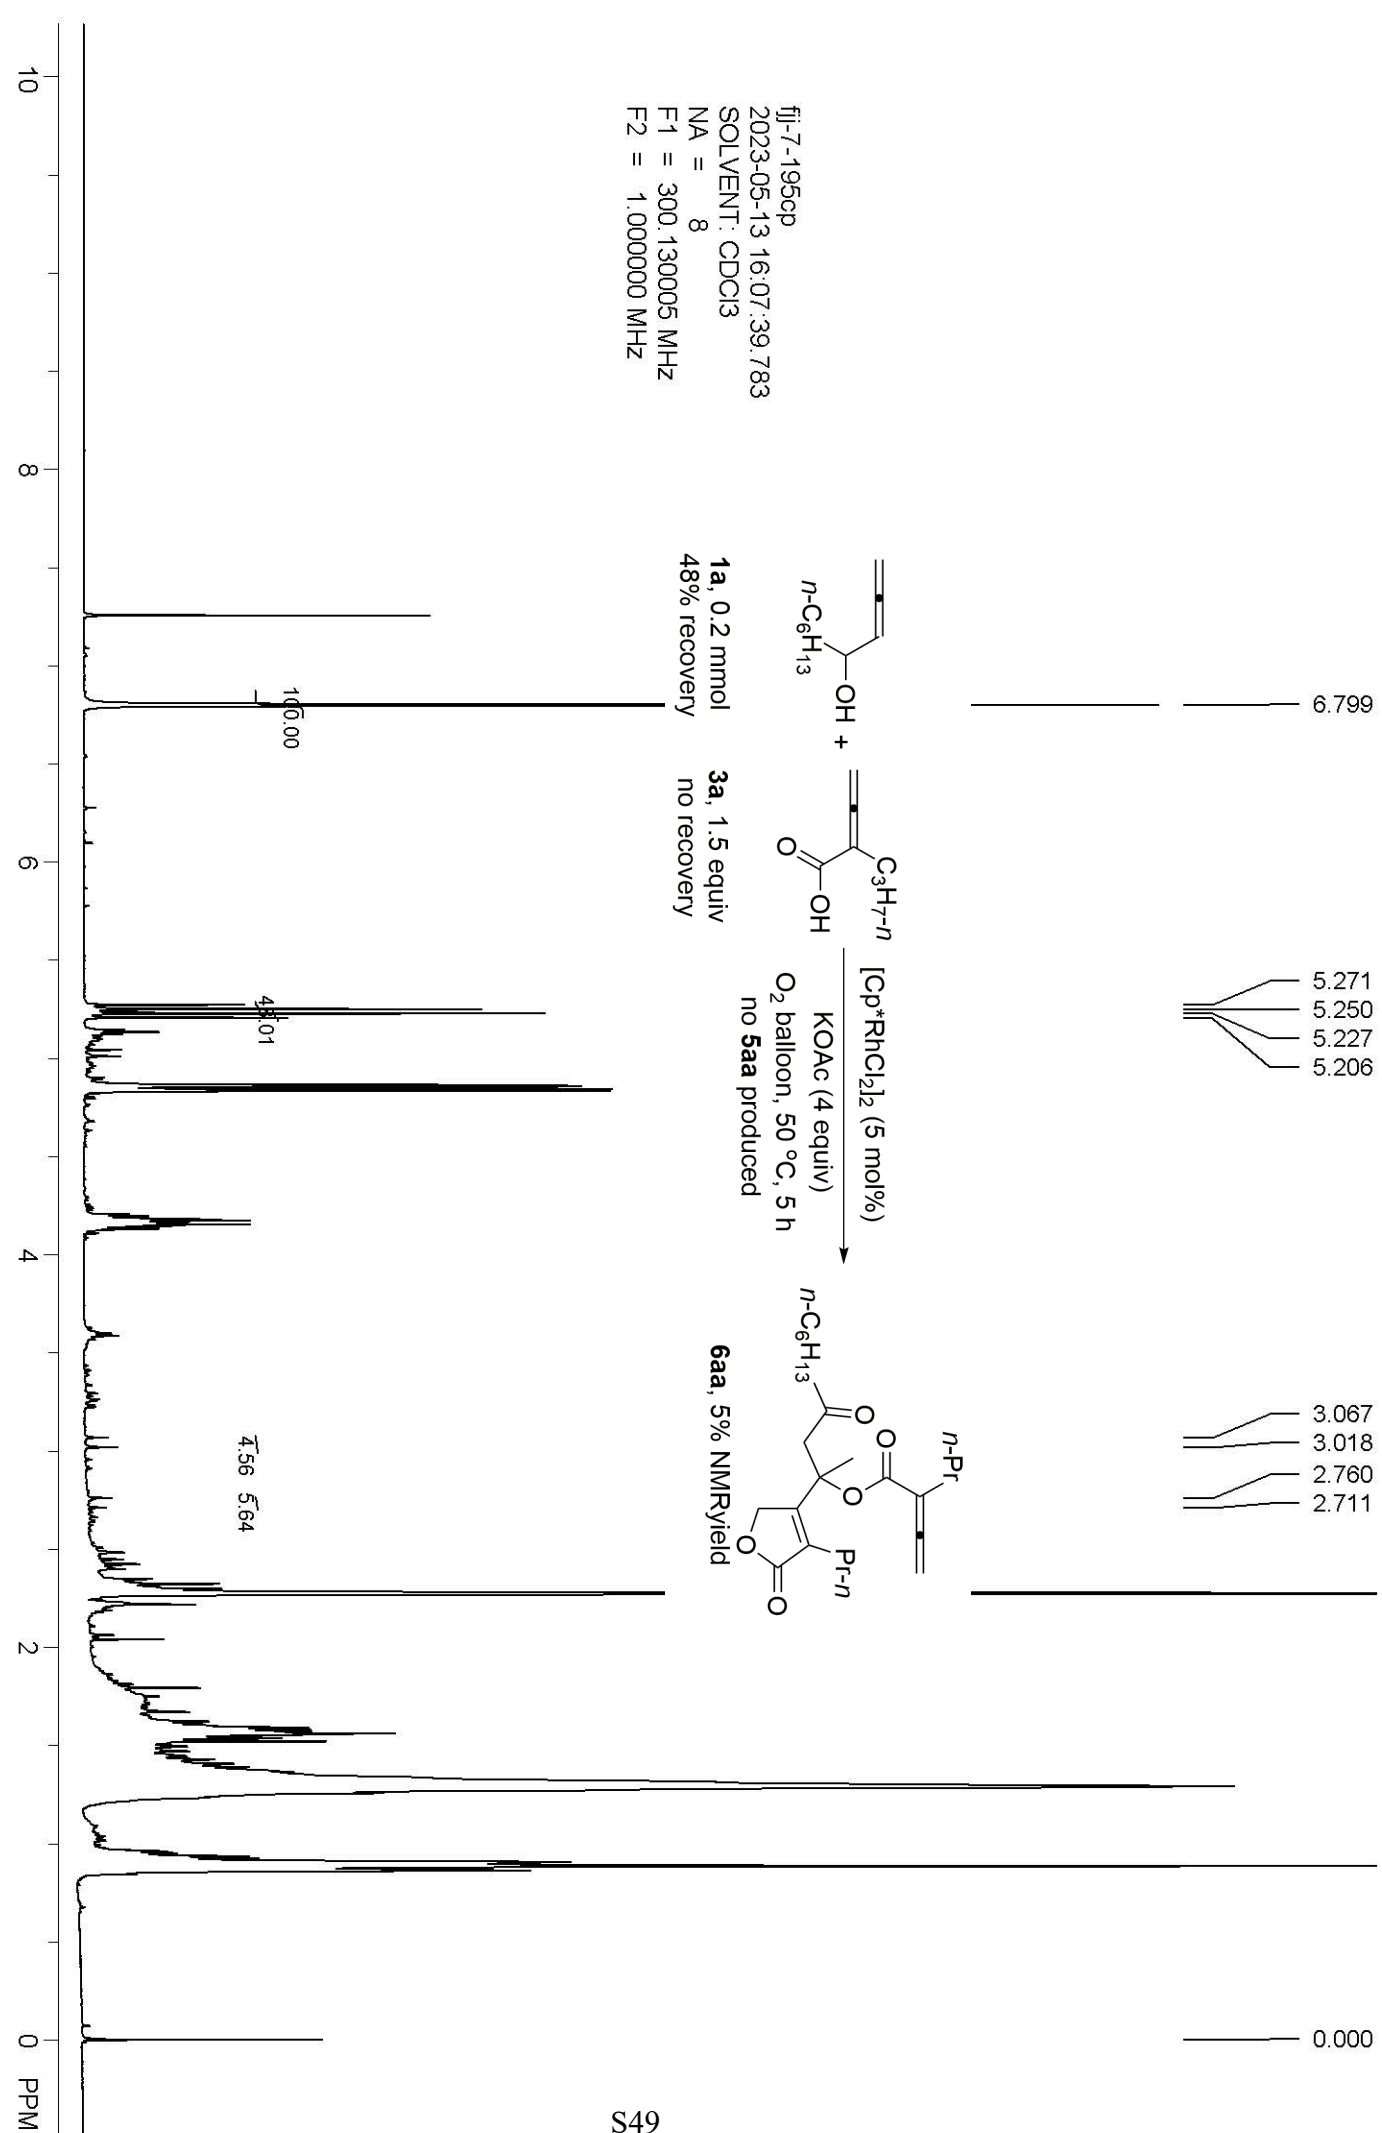

flj-1-085  
 2019-03-14 14:21:30.078  
 SOLVENT: CDCl3  
 NA = 8  
 F1 = 300.130005 MHz  
 F2 = 1.000000 MHz

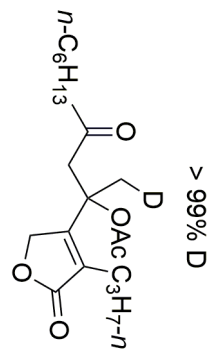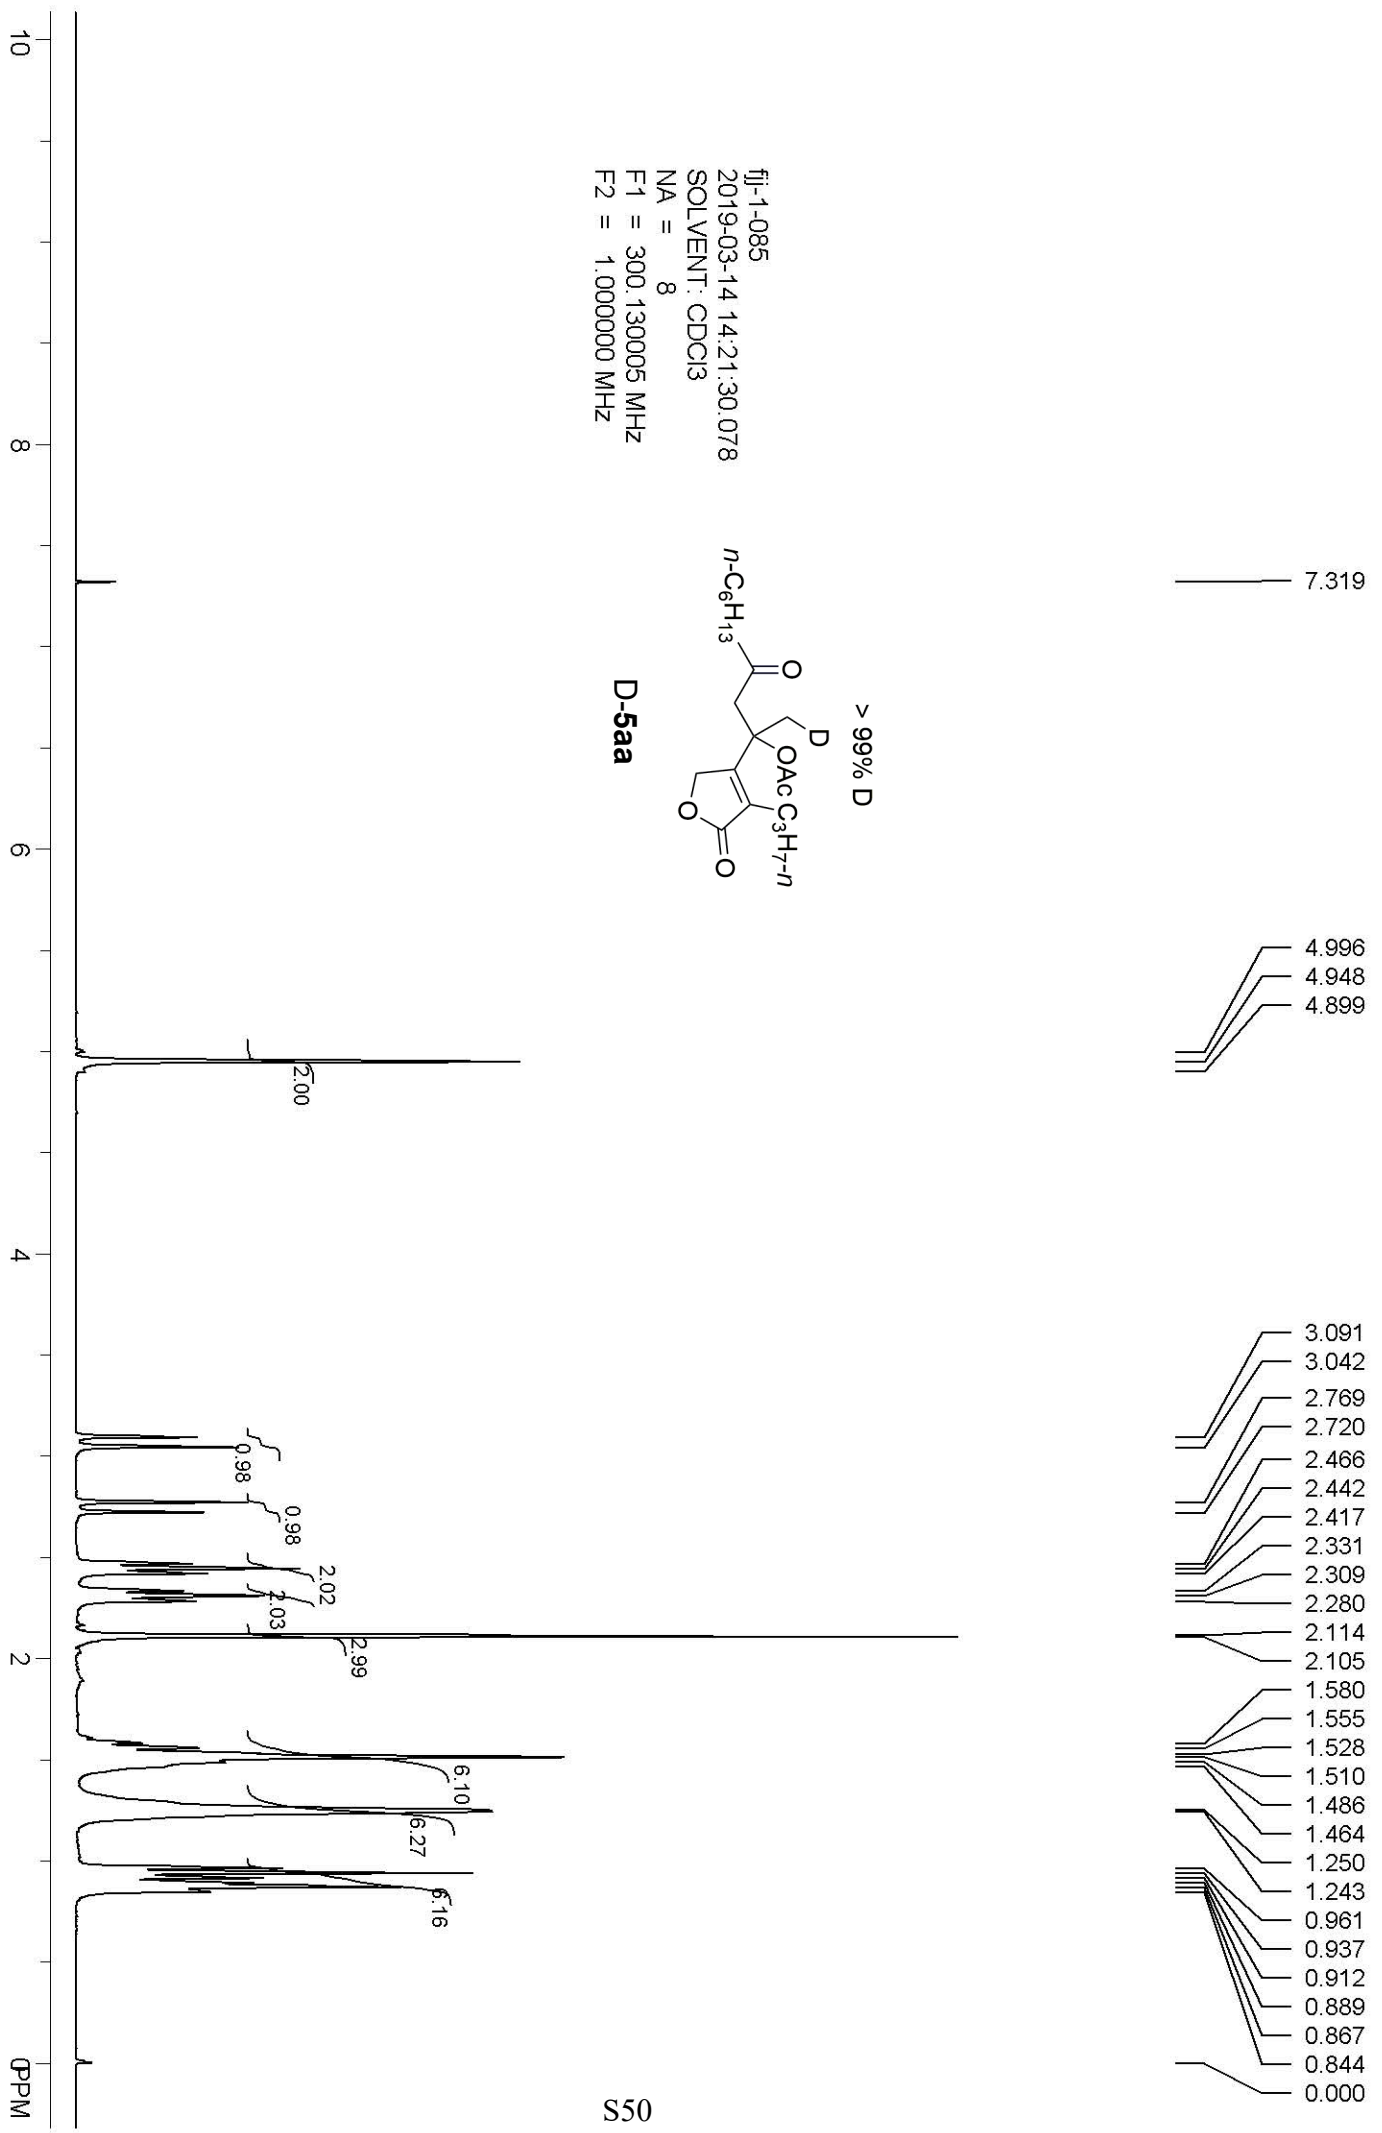

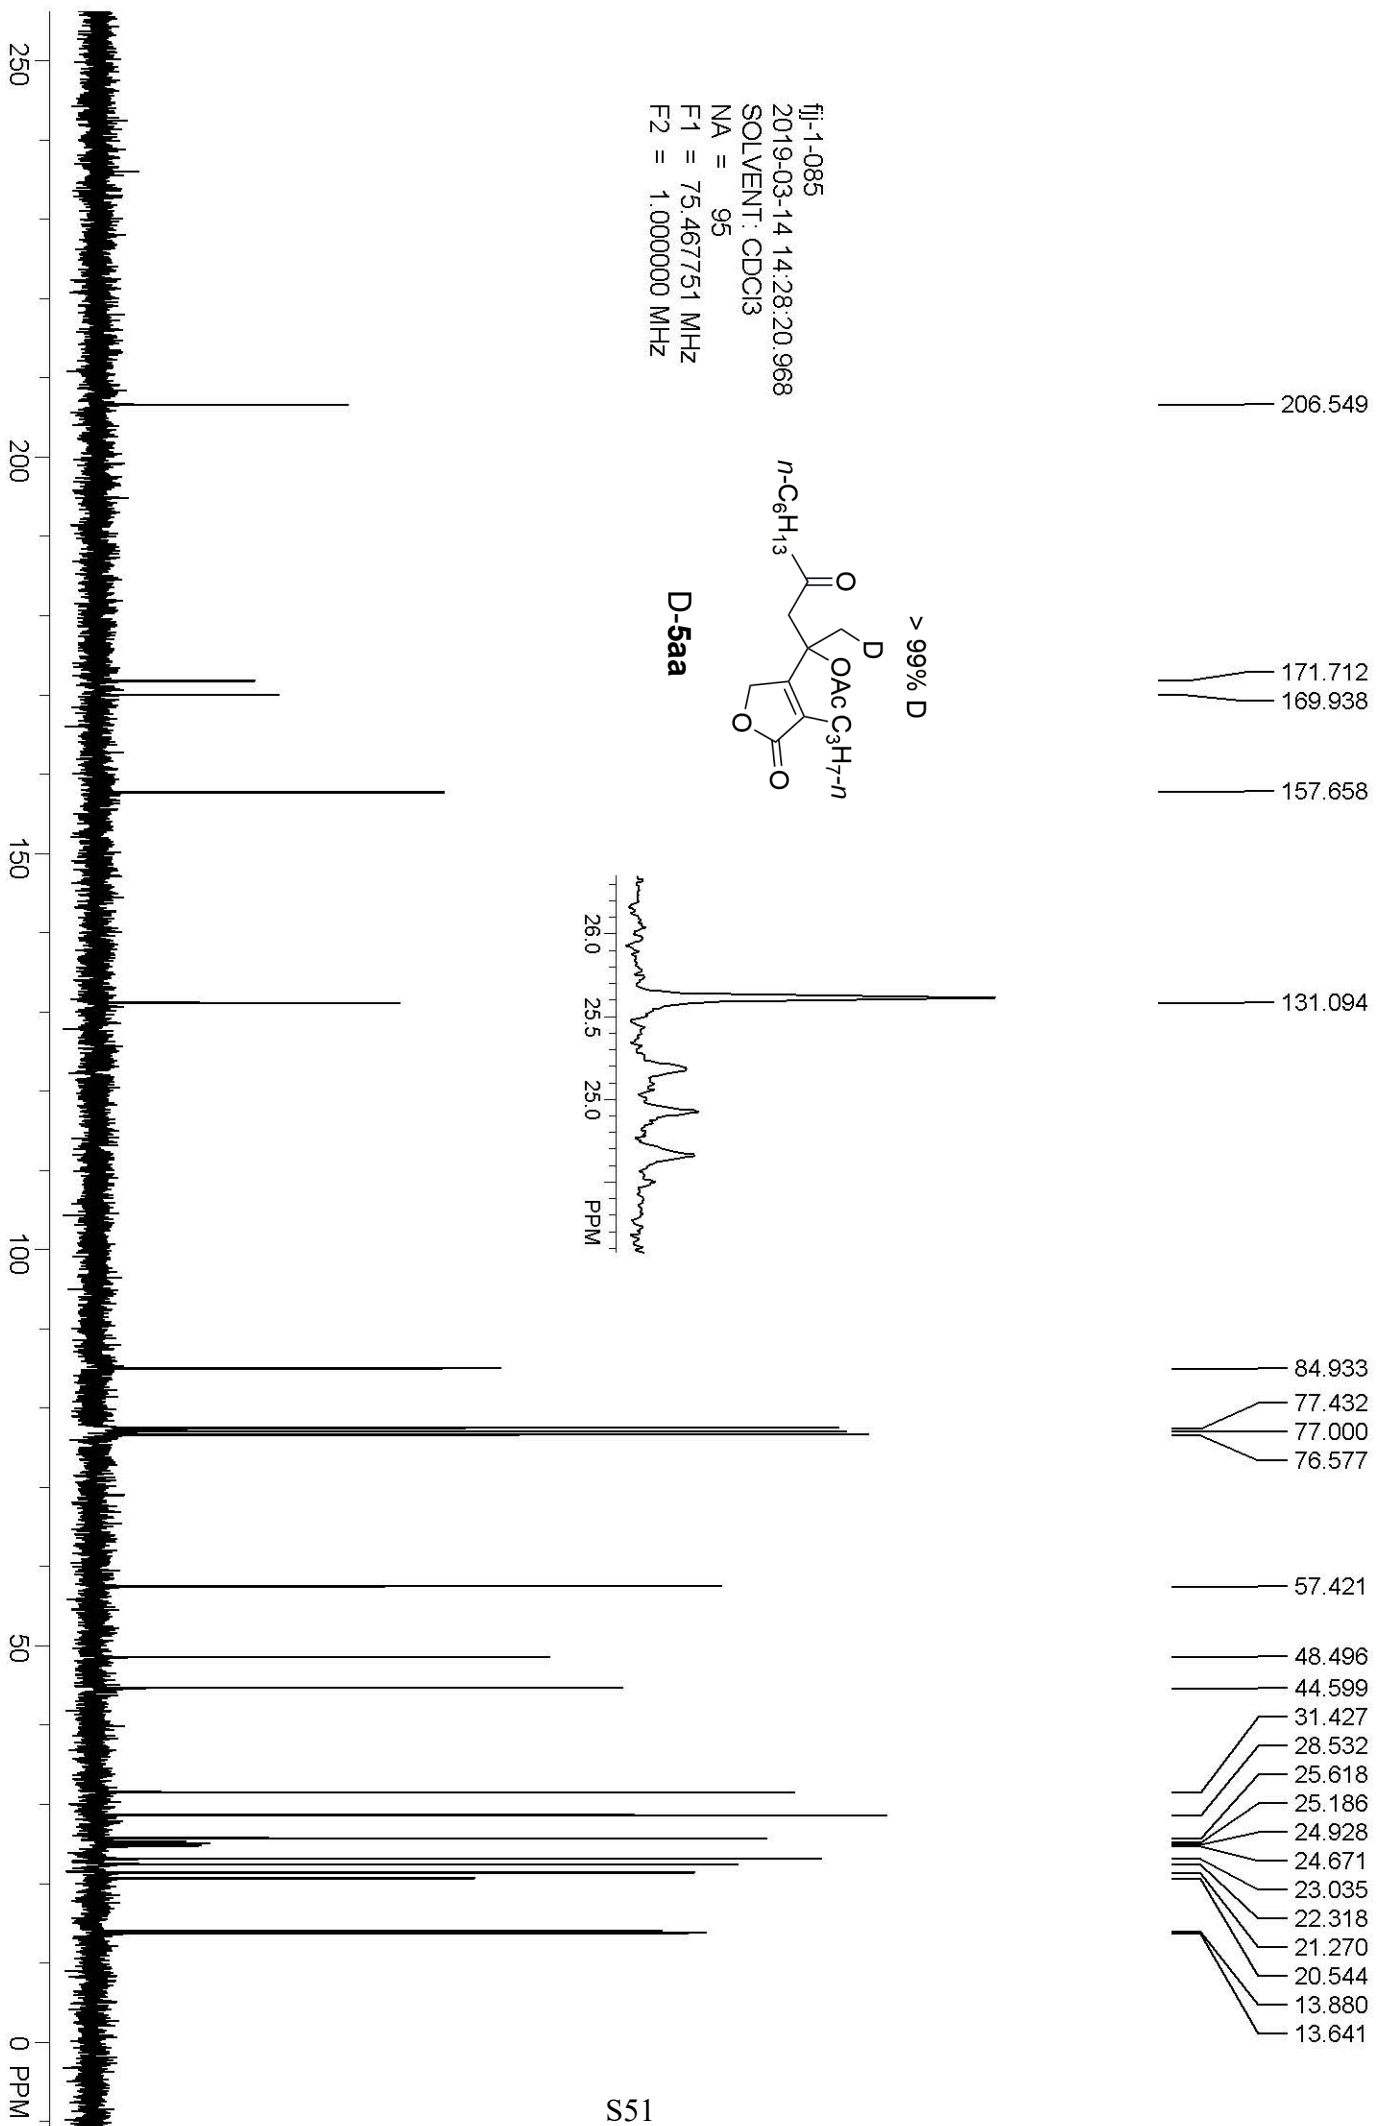

fj-5-071-2  
2021-09-08 00:27:11.025  
SOLVENT: CDCl3  
NA = 16  
F1 = 400.130005 MHz  
F2 = 1.000000 MHz

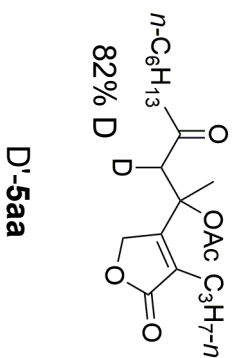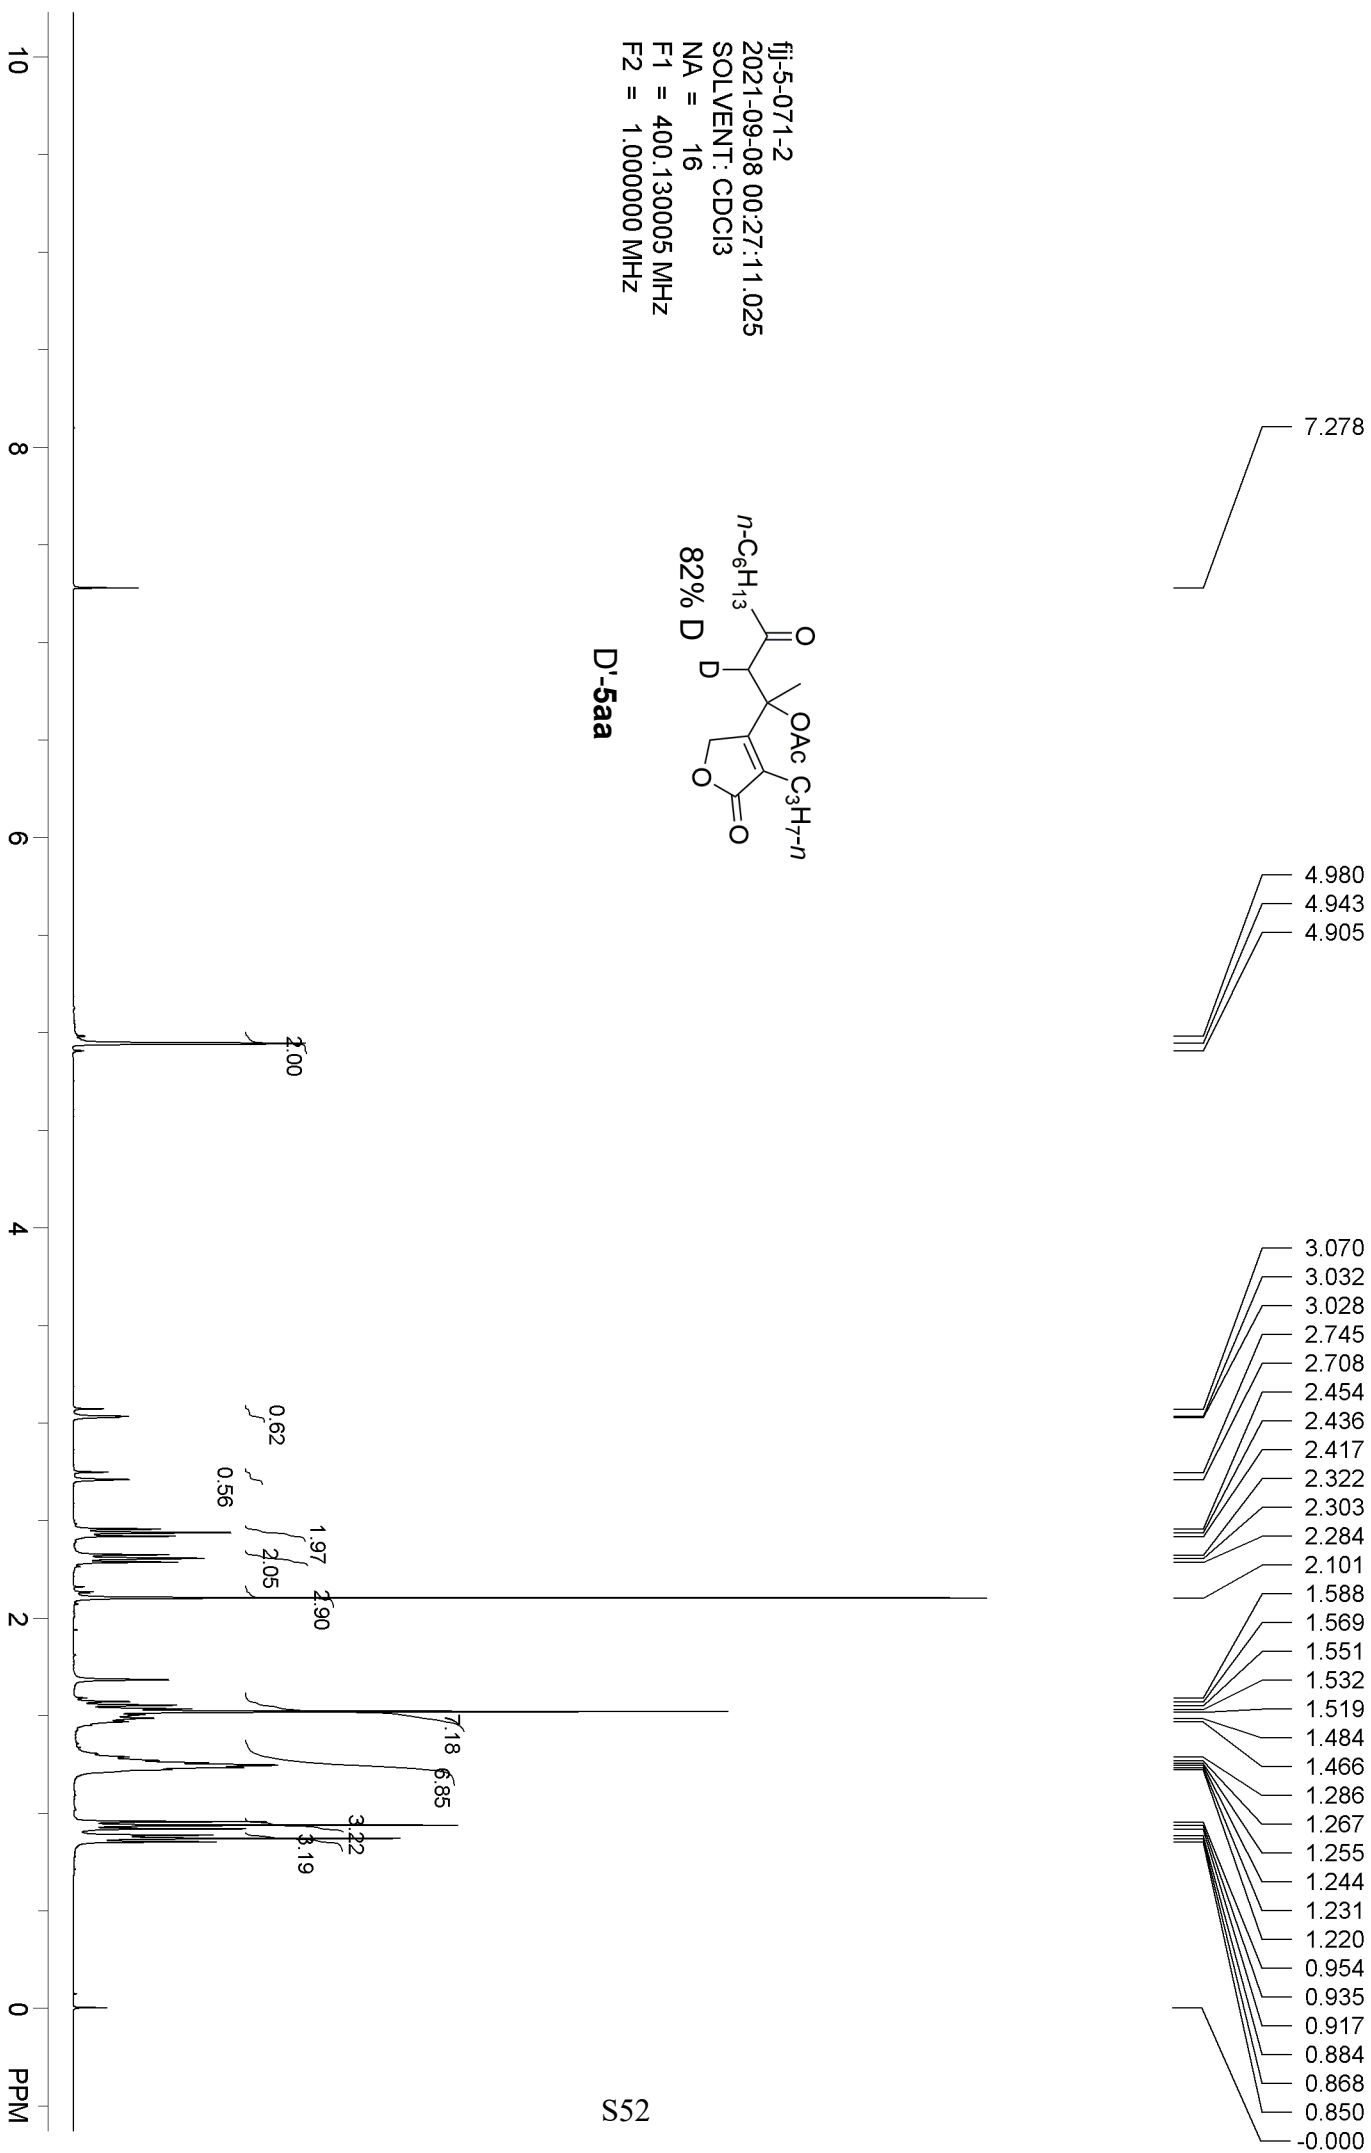

fj-5-071-2  
2021-09-08 01:14:45.440  
SOLVENT: CDCl3  
NA = 1024  
F1 = 100.612770 MHz  
F2 = 1.000000 MHz

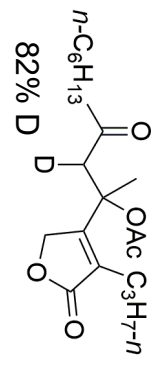

D'-5aaa

206.703  
206.685  
206.640

171.772  
170.029

157.715

131.243

85.044  
85.017  
77.316  
77.000  
76.684

57.508  
48.678  
48.569  
48.389  
48.181  
44.723  
31.506  
28.625  
25.718  
25.267  
25.249  
25.222  
23.127  
22.396  
21.358  
20.626  
13.954  
13.719

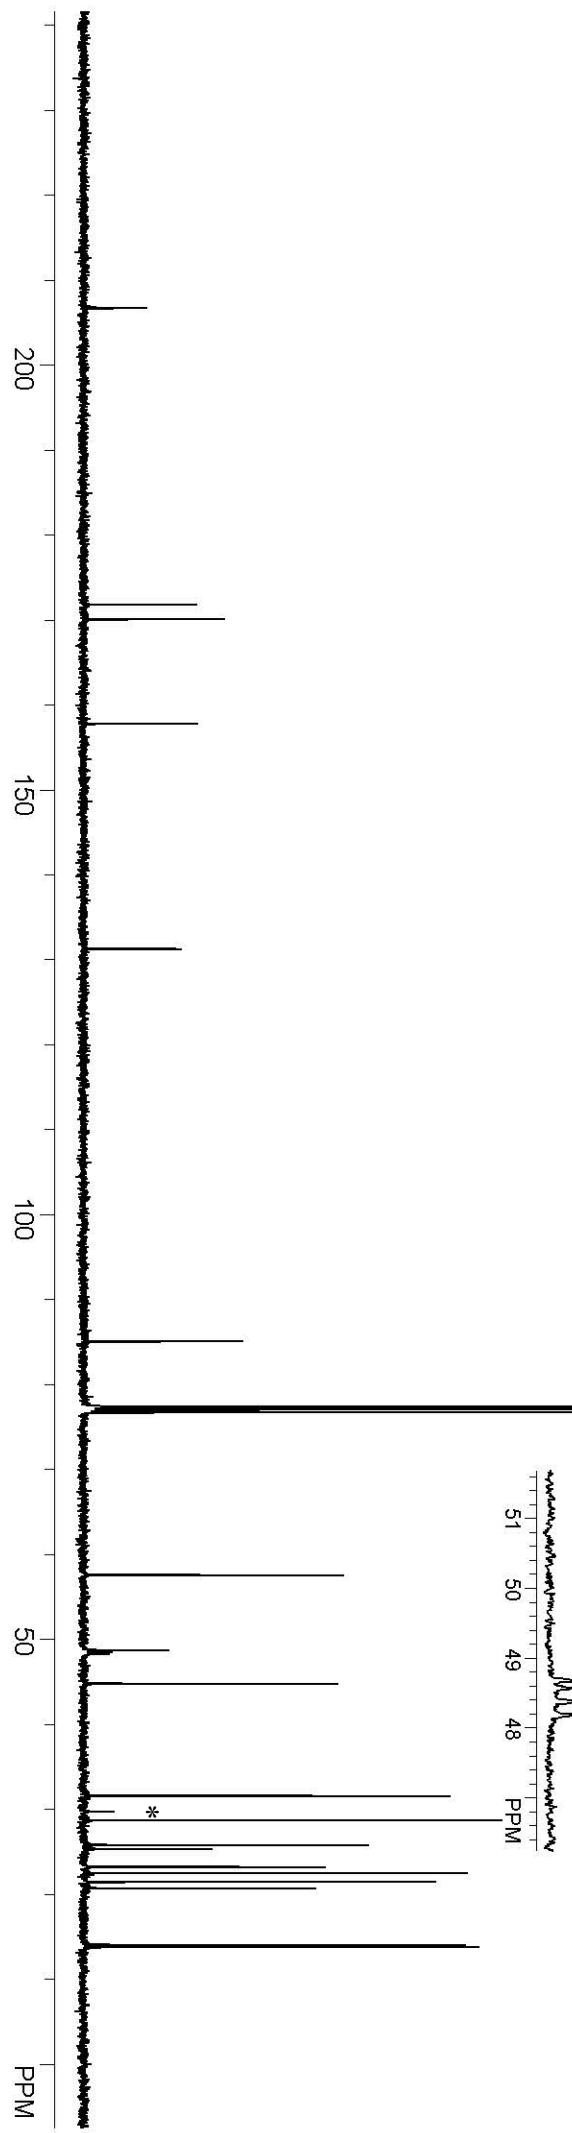

fj-5-073  
 2021-09-10 13:29:04.312  
 SOLVENT: CDCl3  
 NA = 8  
 F1 = 300.130005 MHz  
 F2 = 1.000000 MHz

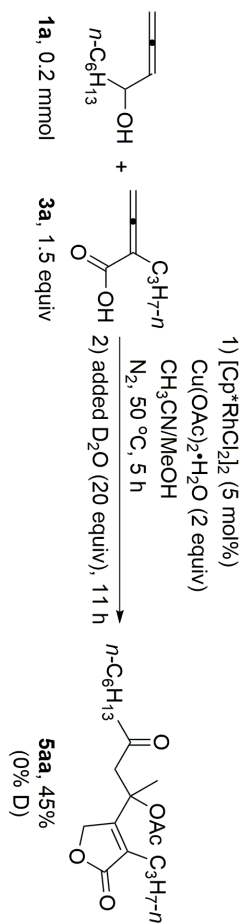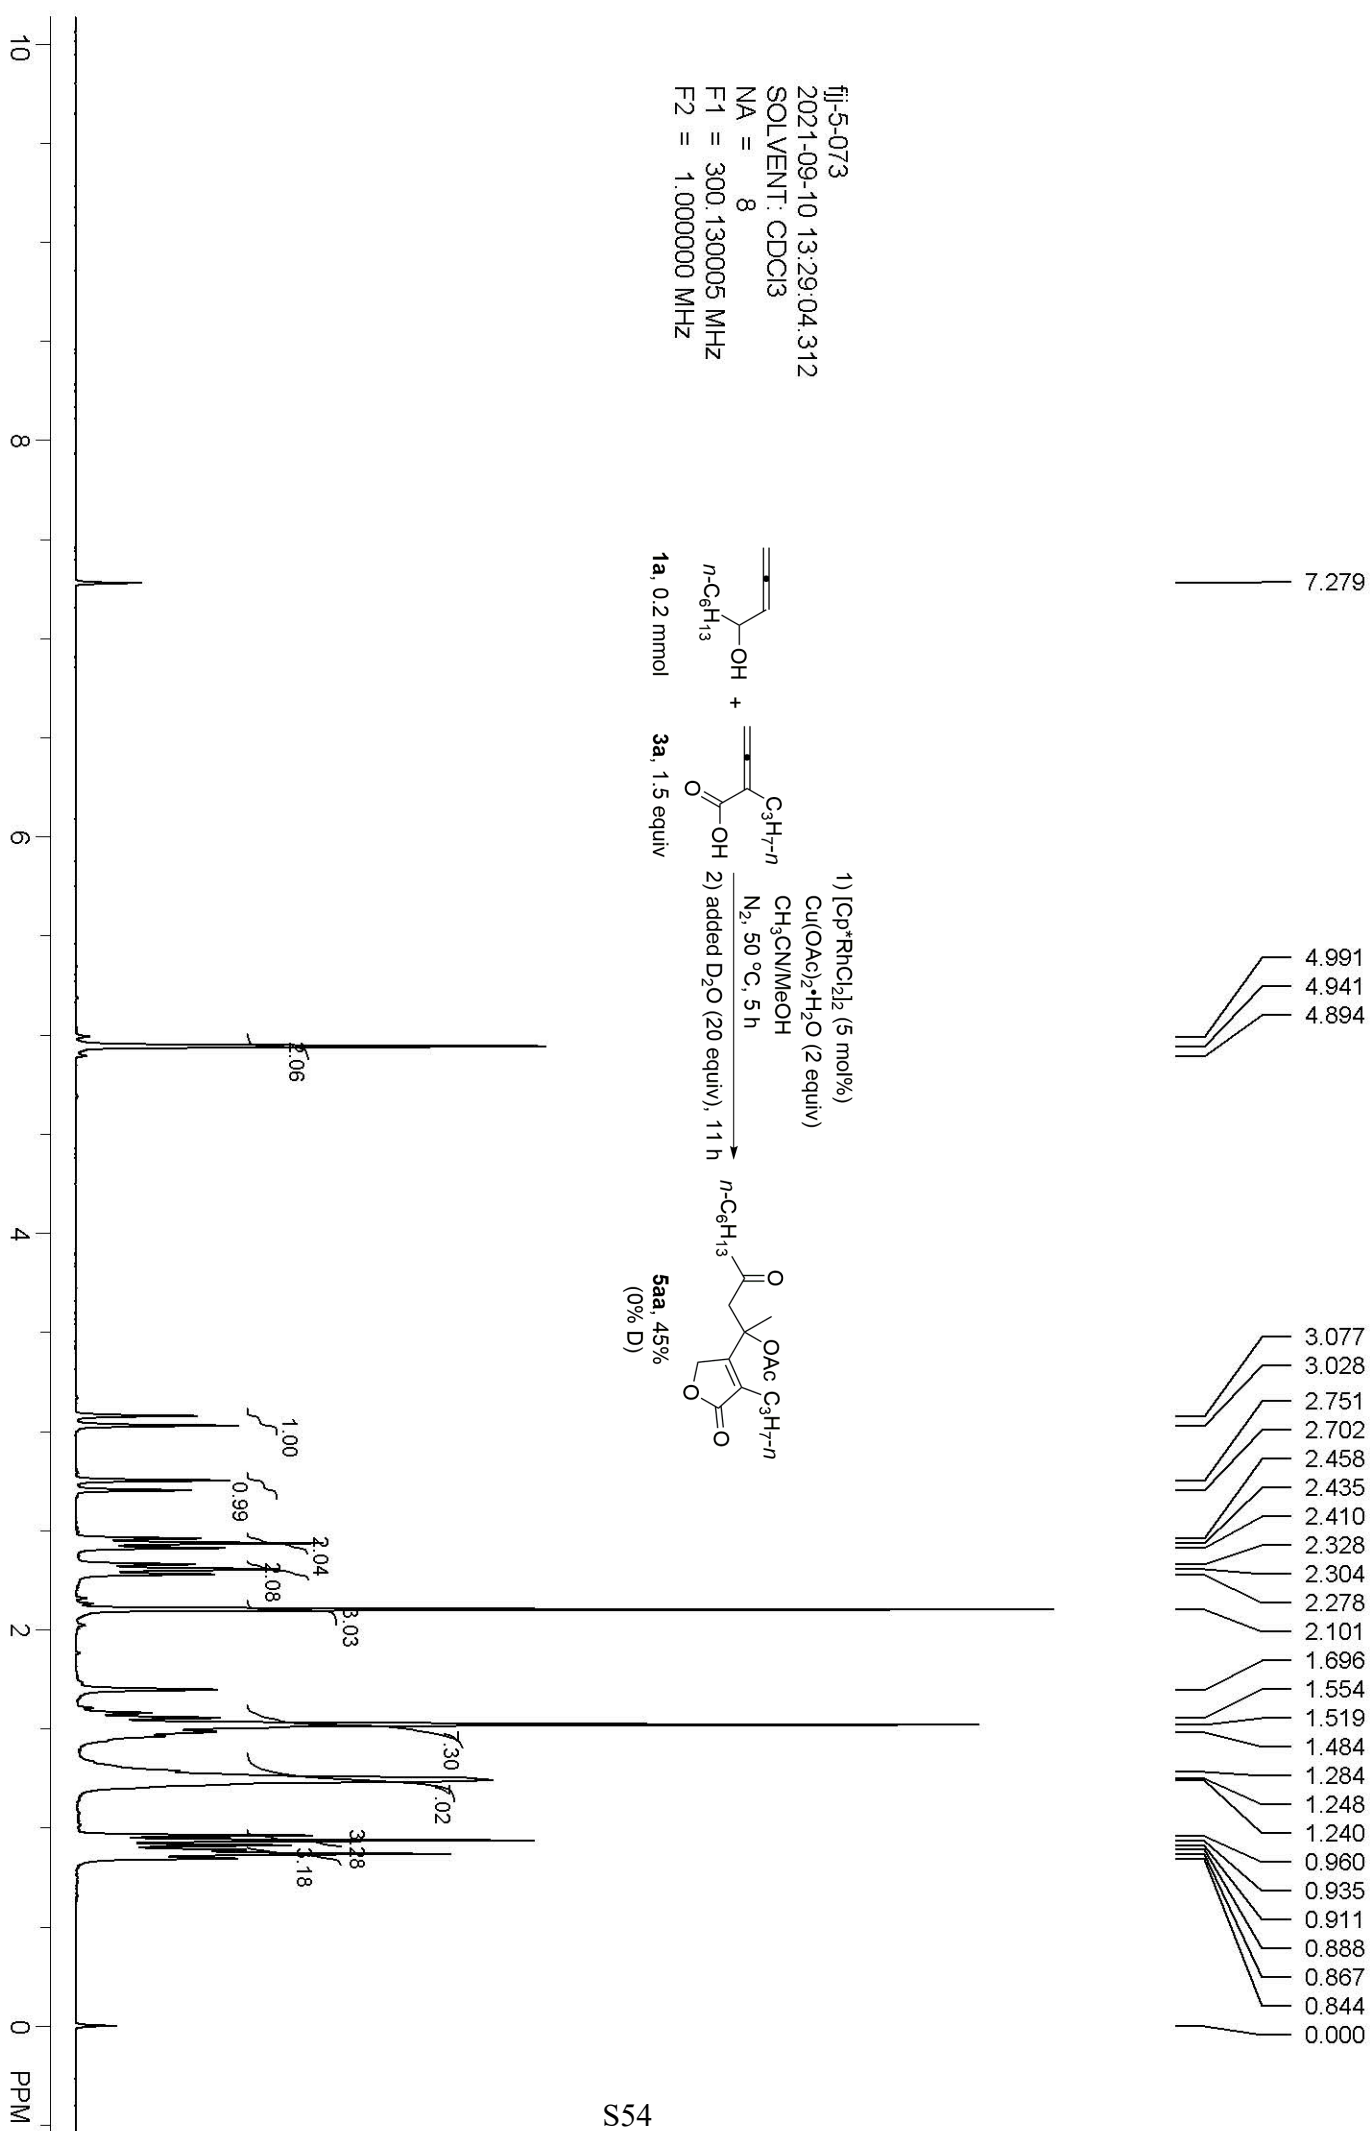



fjl-1-052  
2018-12-26 13:05:49.828  
SOLVENT: CDCl3  
NA = 118  
F1 = 75.467751 MHz  
F2 = 1.000000 MHz

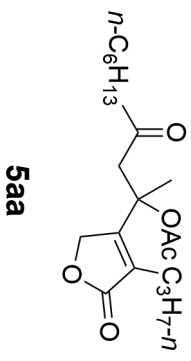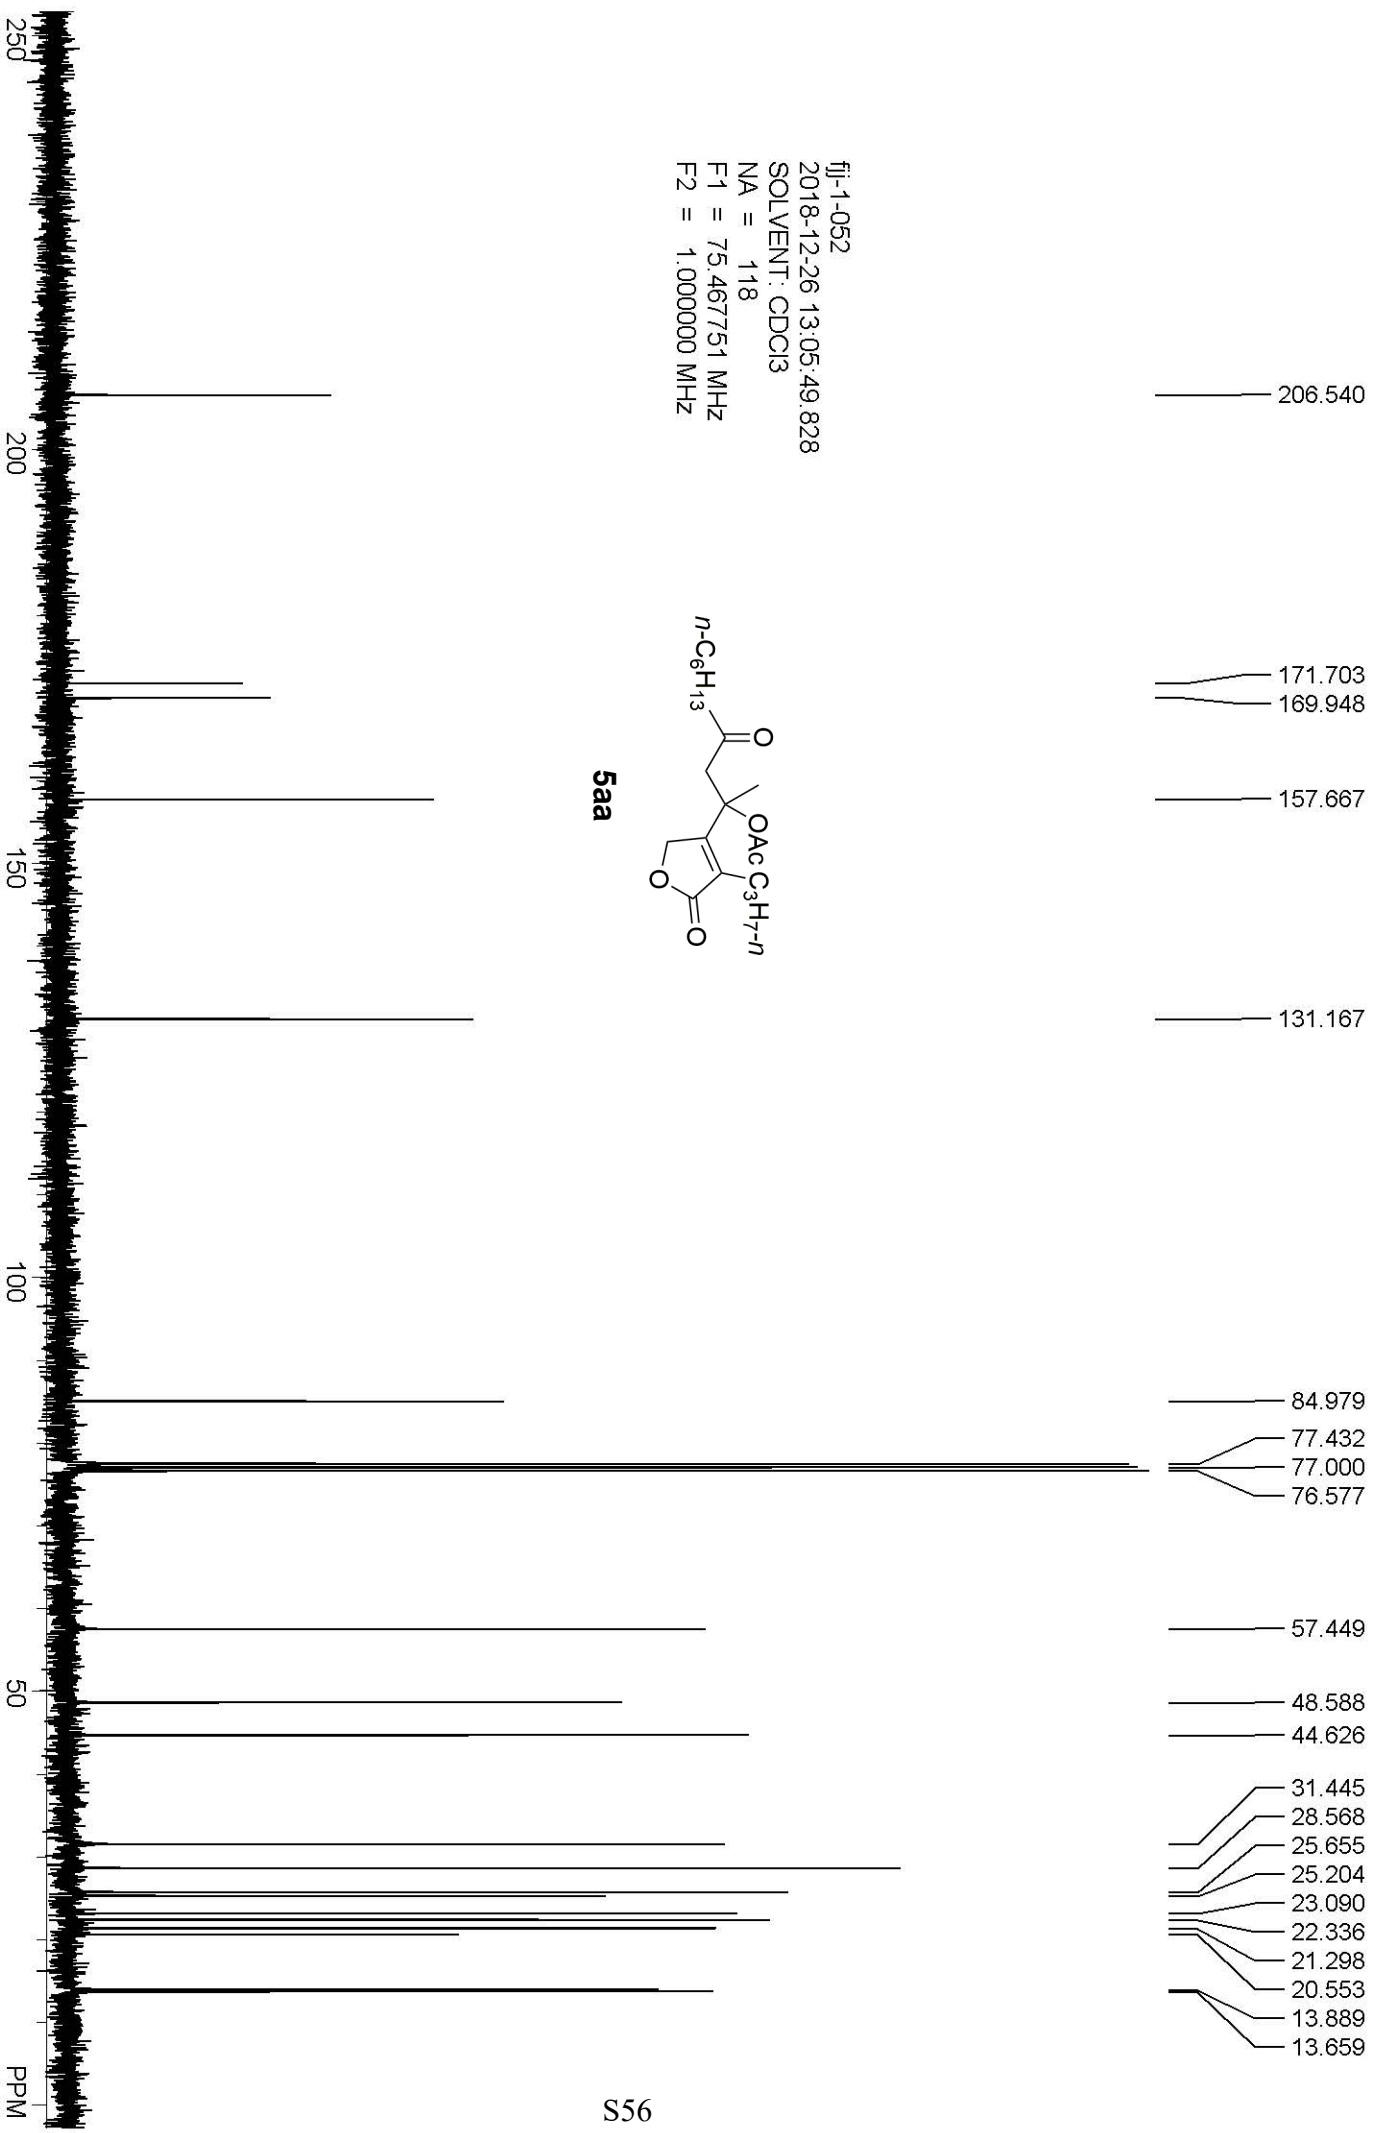





fj-1-104  
2019-04-01 13:47:49.953  
SOLVENT: CDCl3  
NA = 200  
F1 = 75.467751 MHz  
F2 = 1.000000 MHz

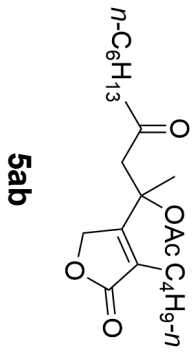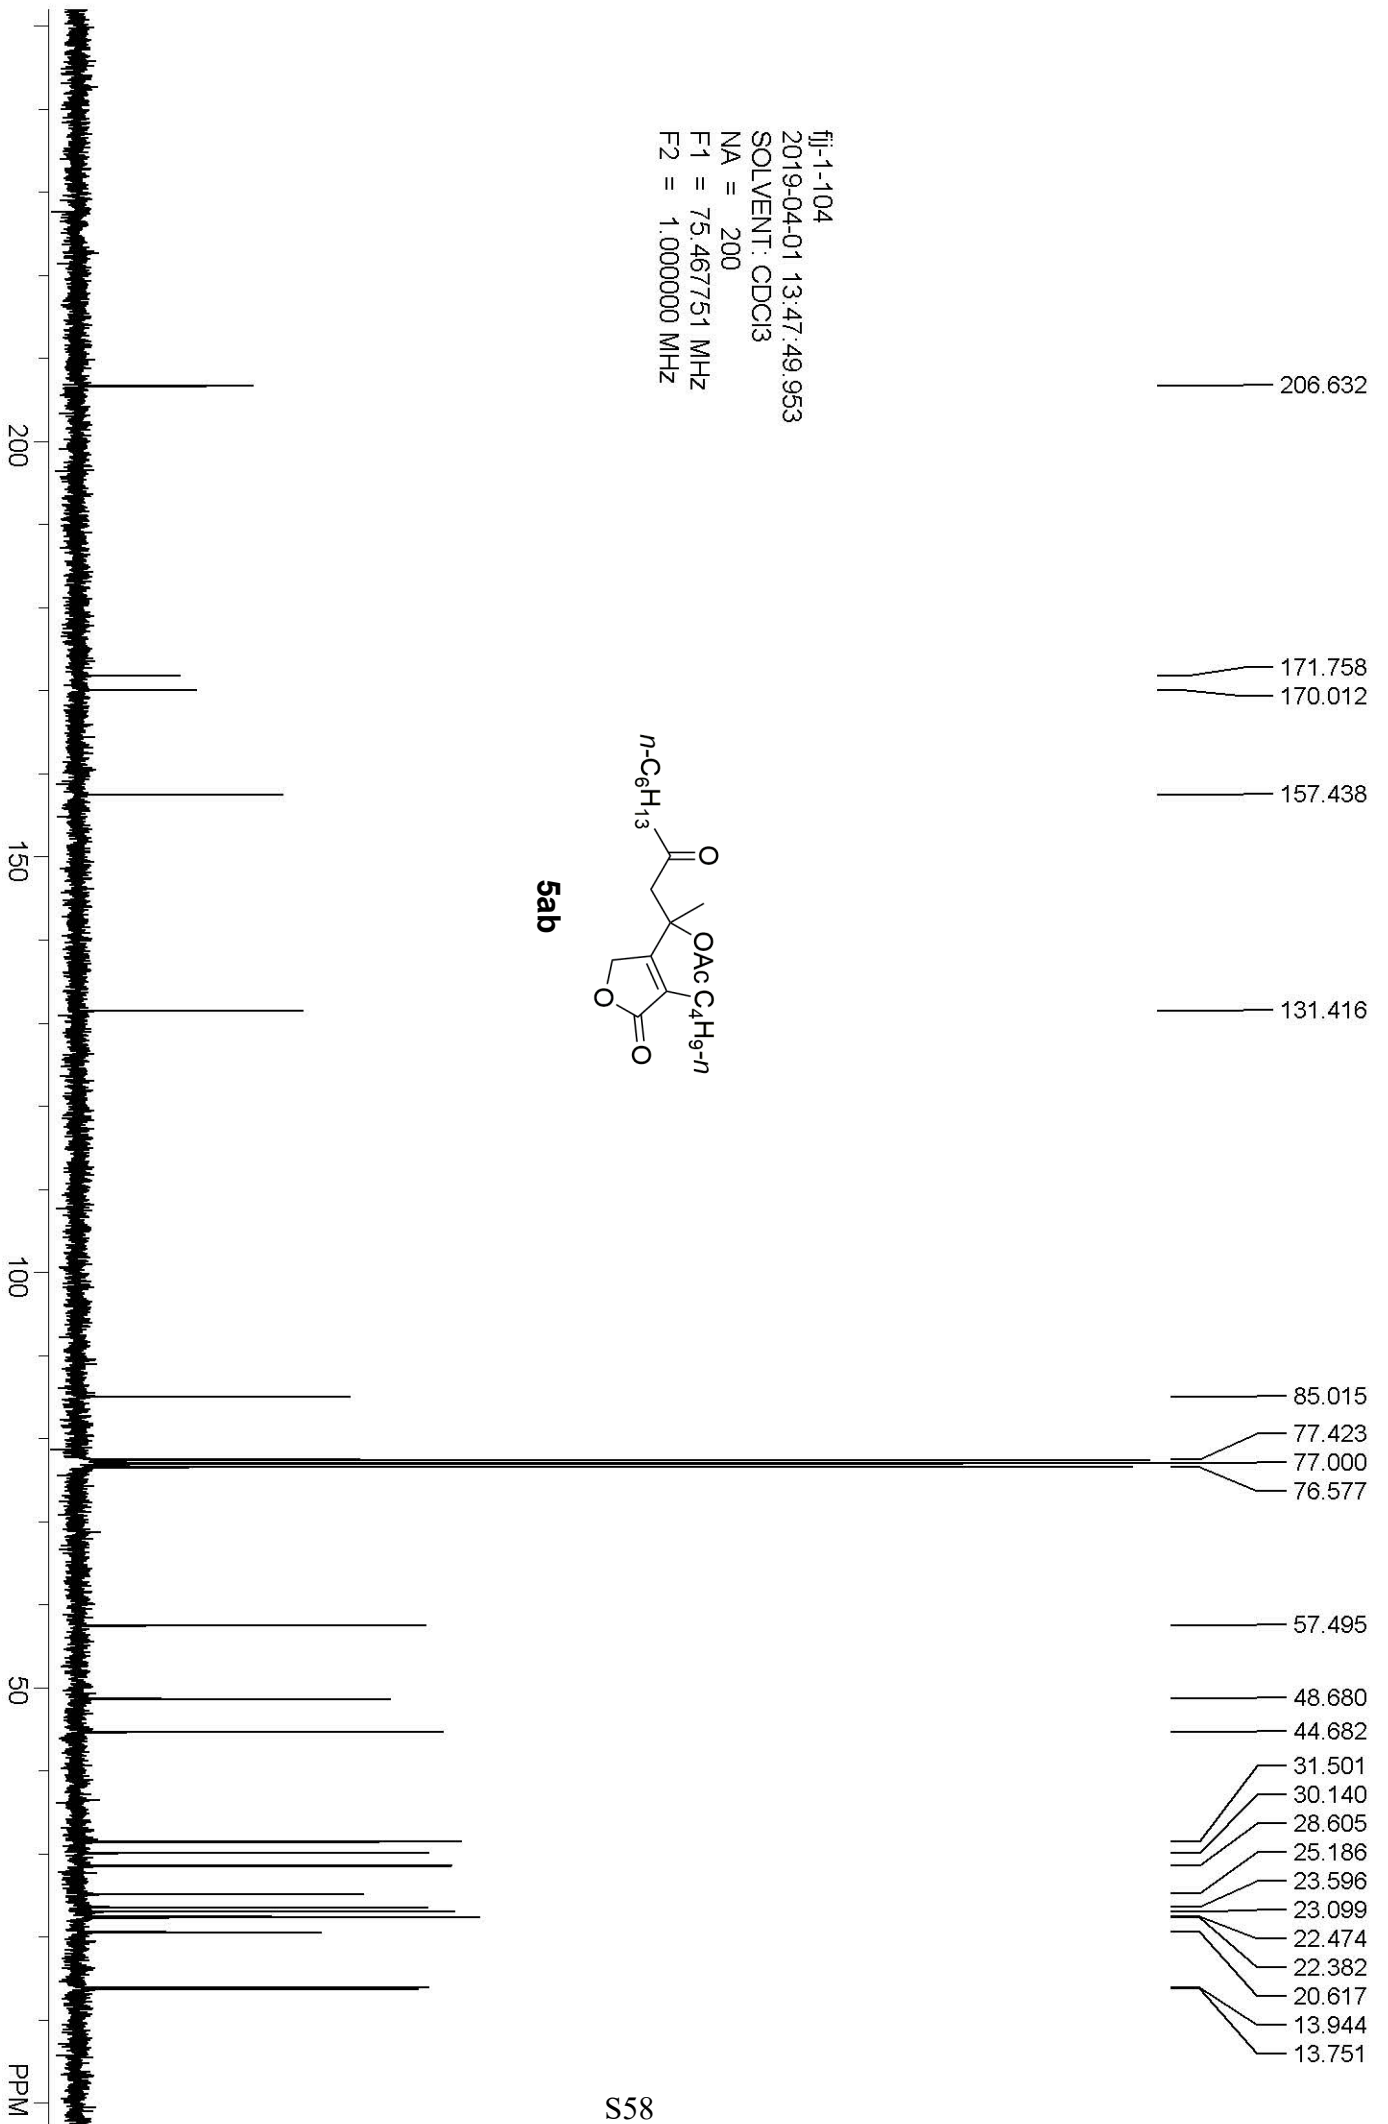

fj-1-073  
2019-03-06 10:53:48.109  
SOLVENT: CDCl3  
NA = 8  
F1 = 300.130005 MHz  
F2 = 1.000000 MHz

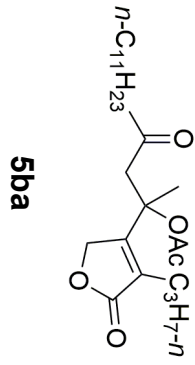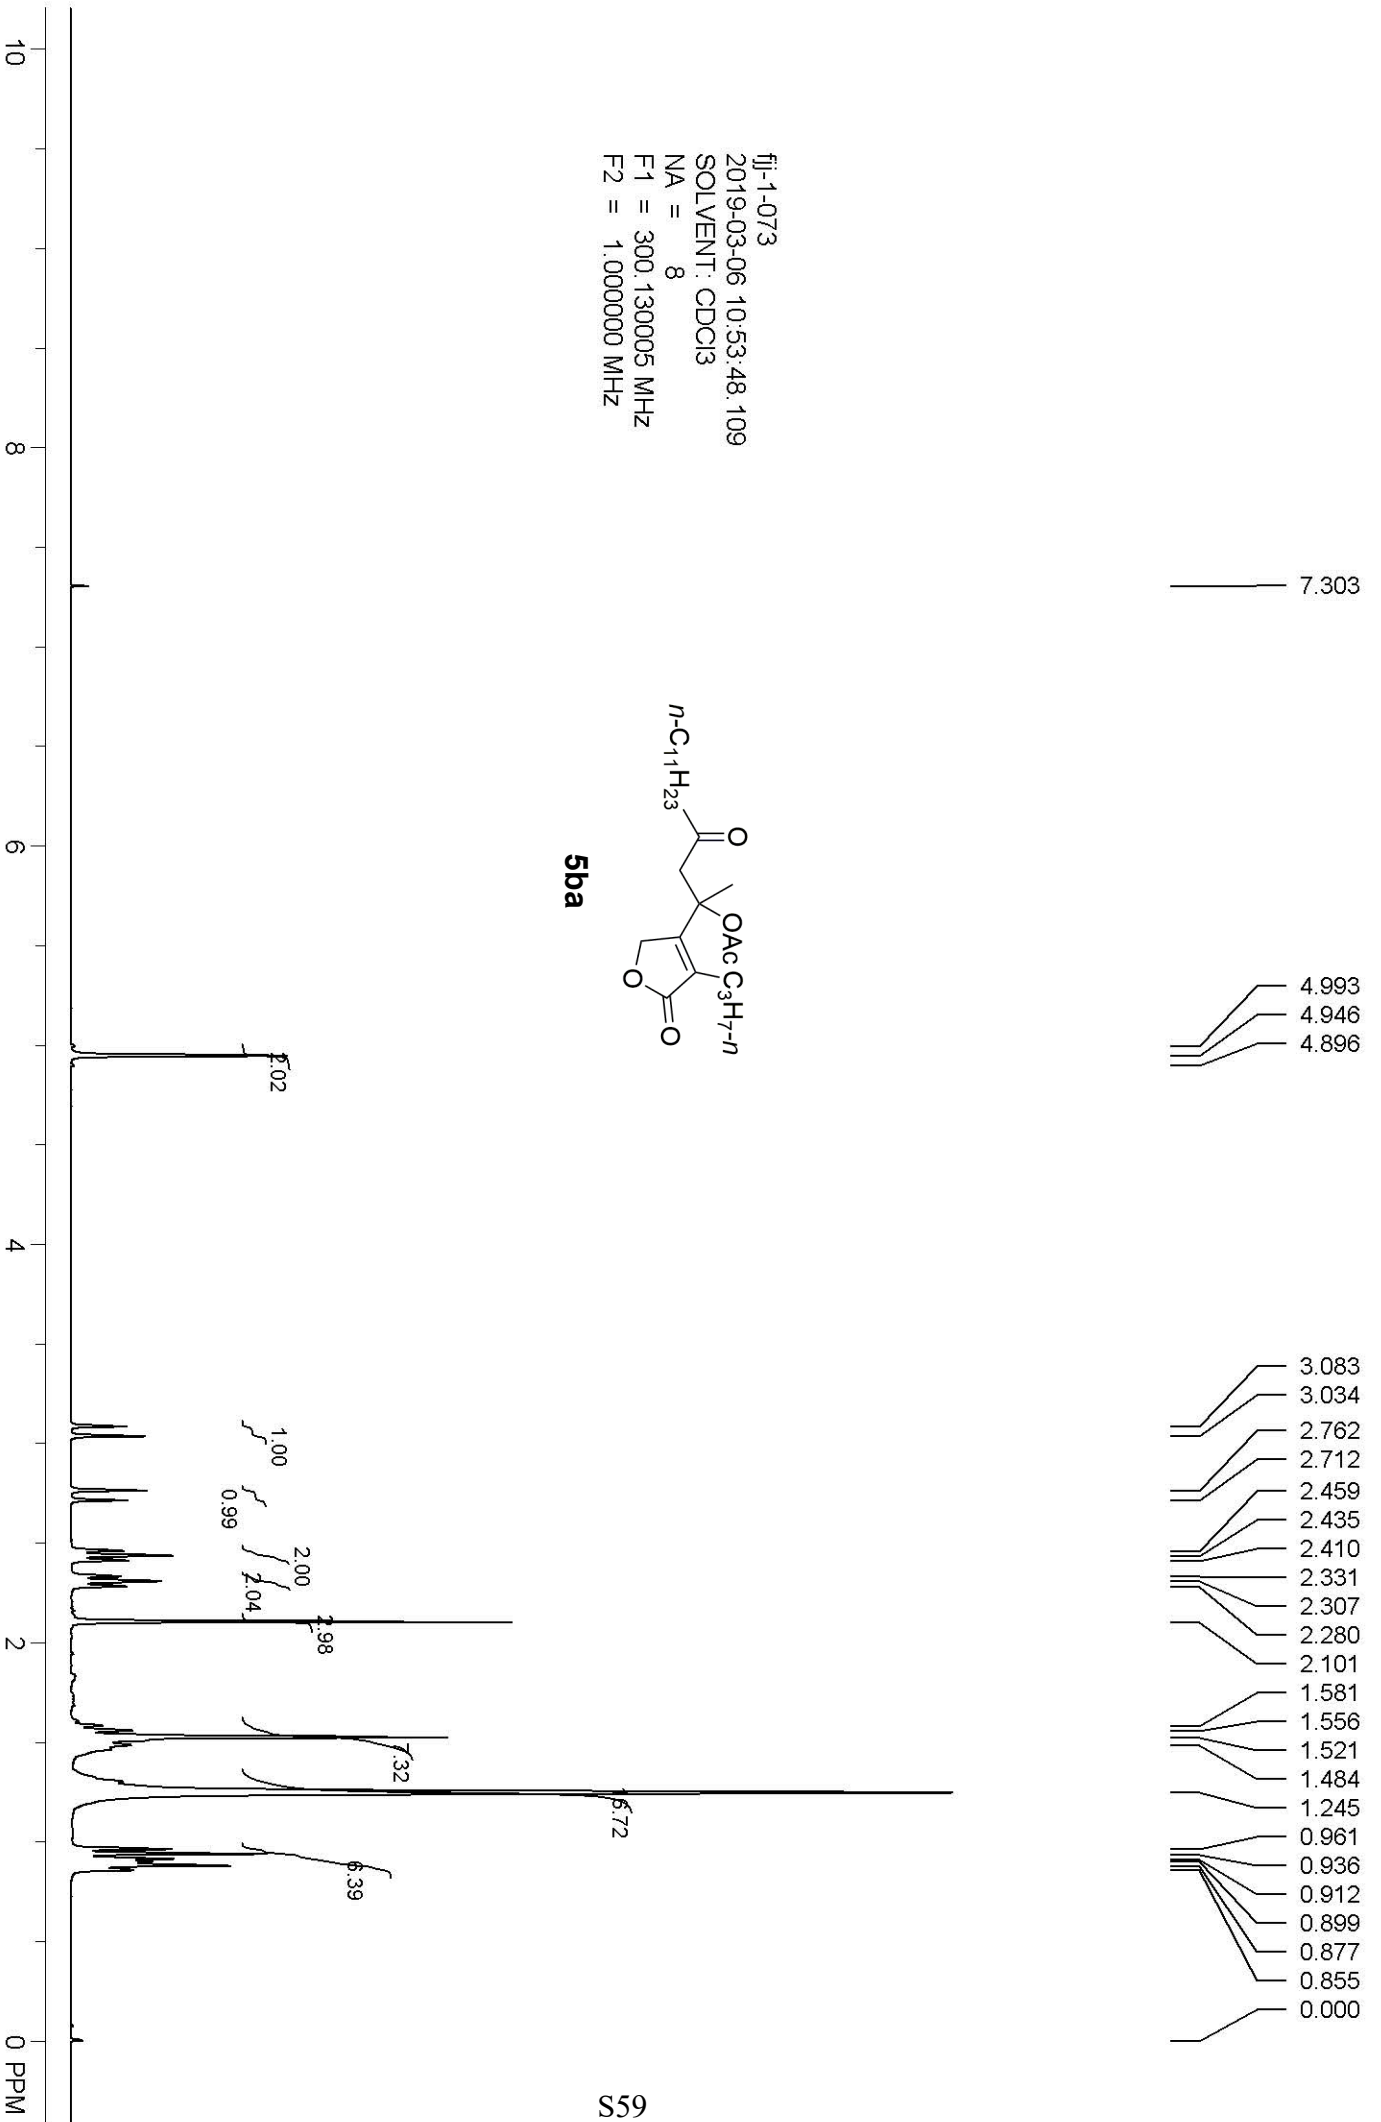

fj-1-073  
2019-03-06 11:06:53.531  
SOLVENT: CDCl3  
NA = 198  
F1 = 75.467751 MHz  
F2 = 1.000000 MHz

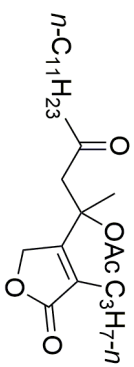

**5ba**

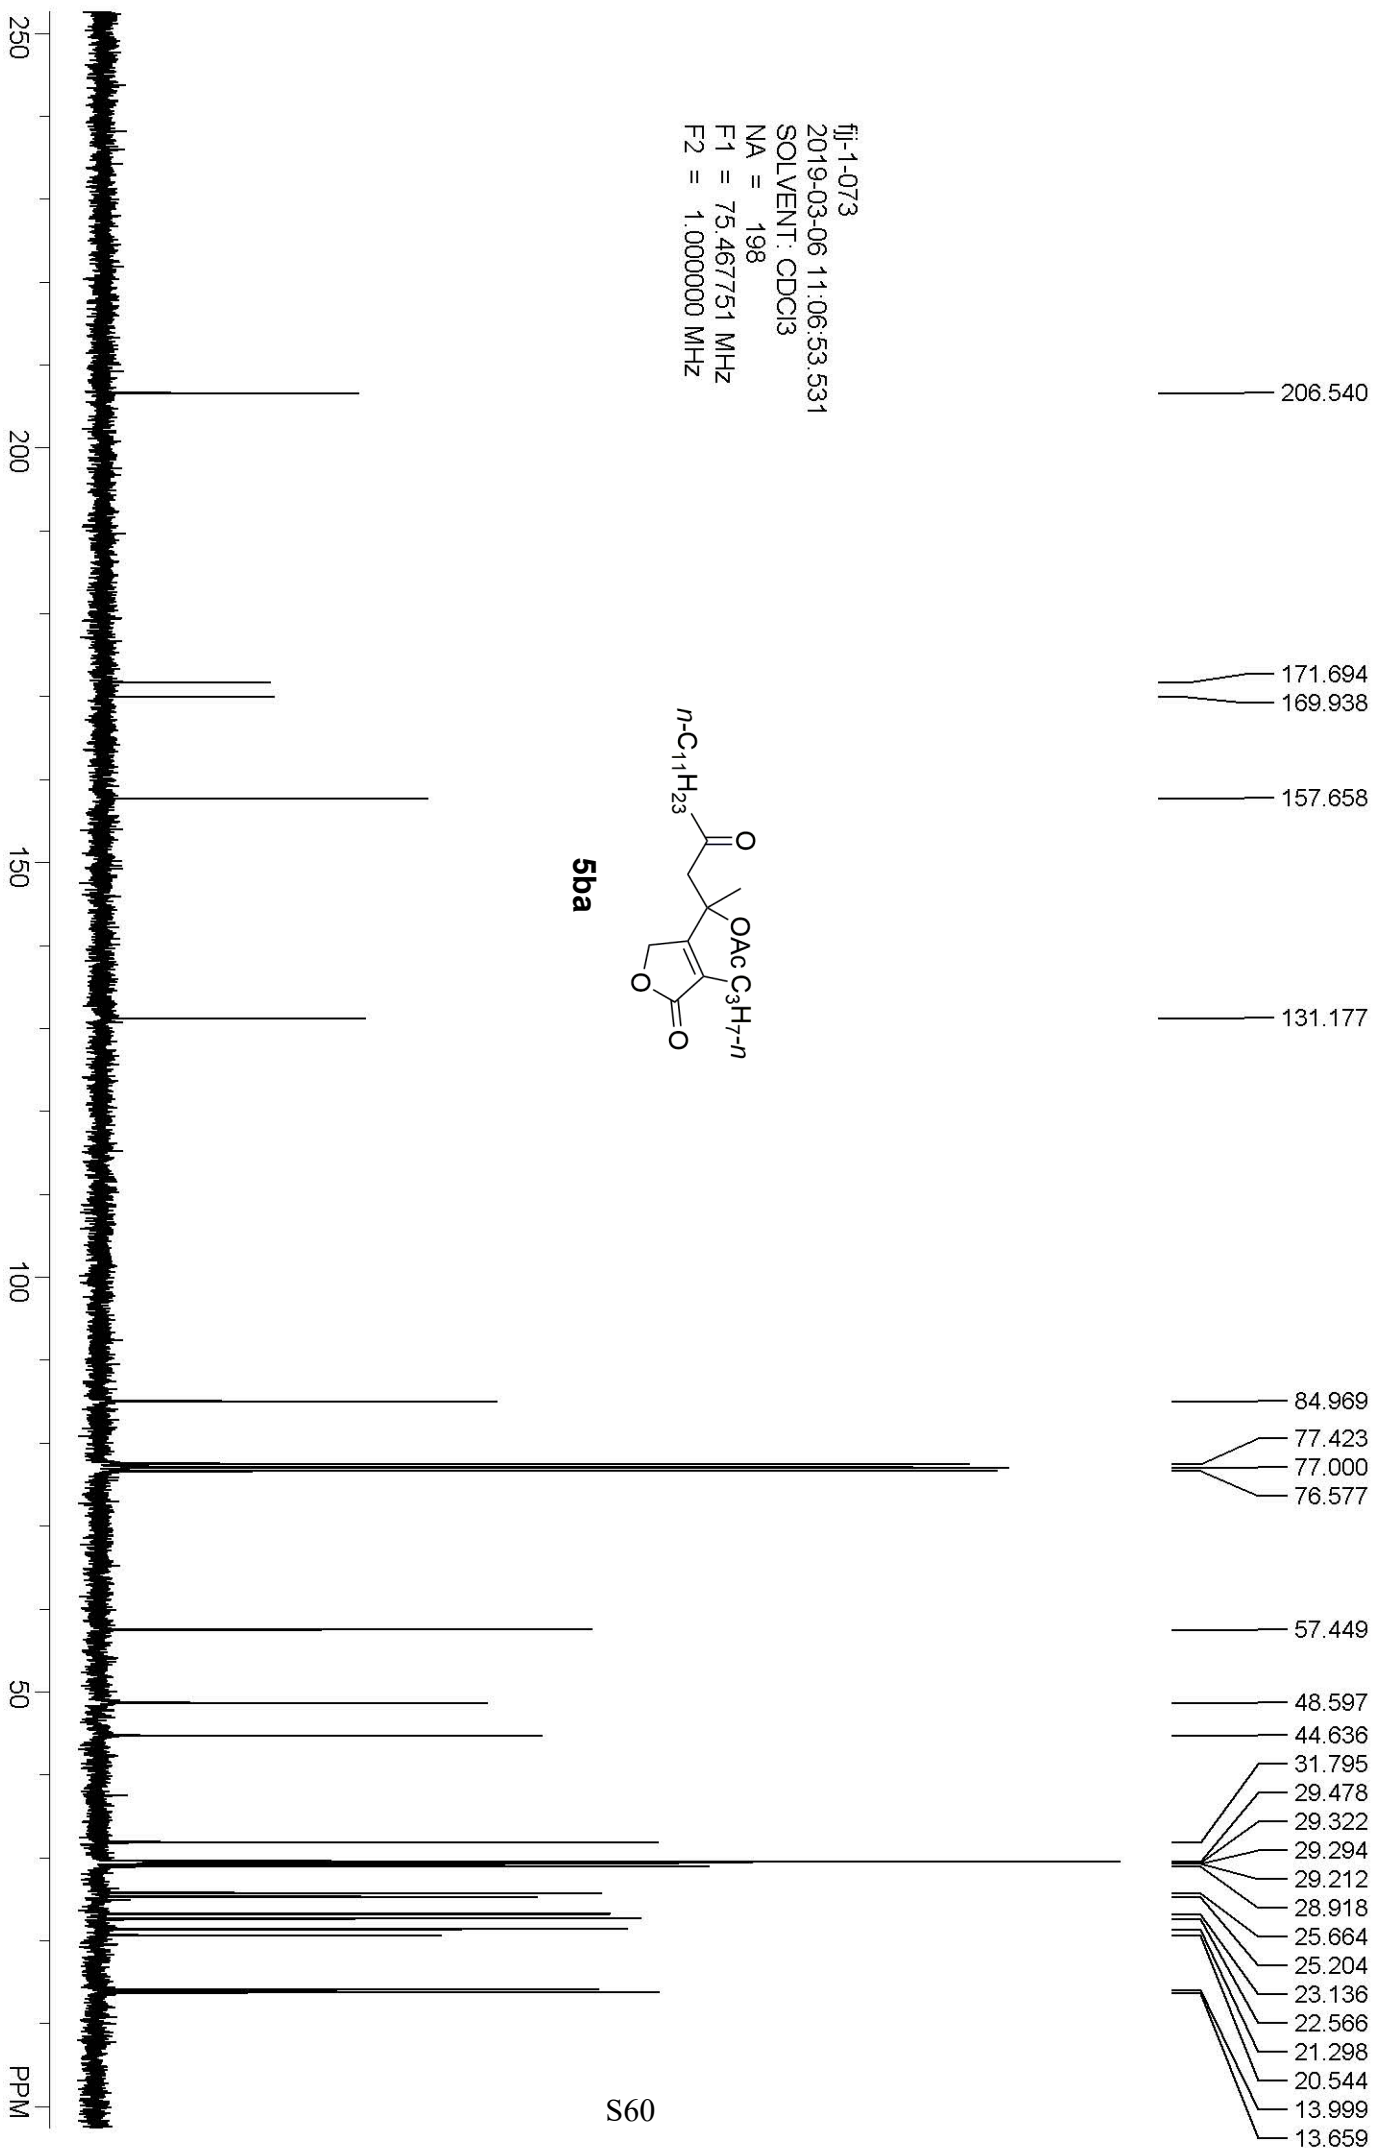

fil-1-075  
2019-03-07 19:00:09.187  
SOLVENT: CDCl3  
NA = 8  
F1 = 300.130005 MHz  
F2 = 1.000000 MHz

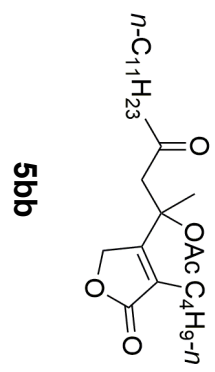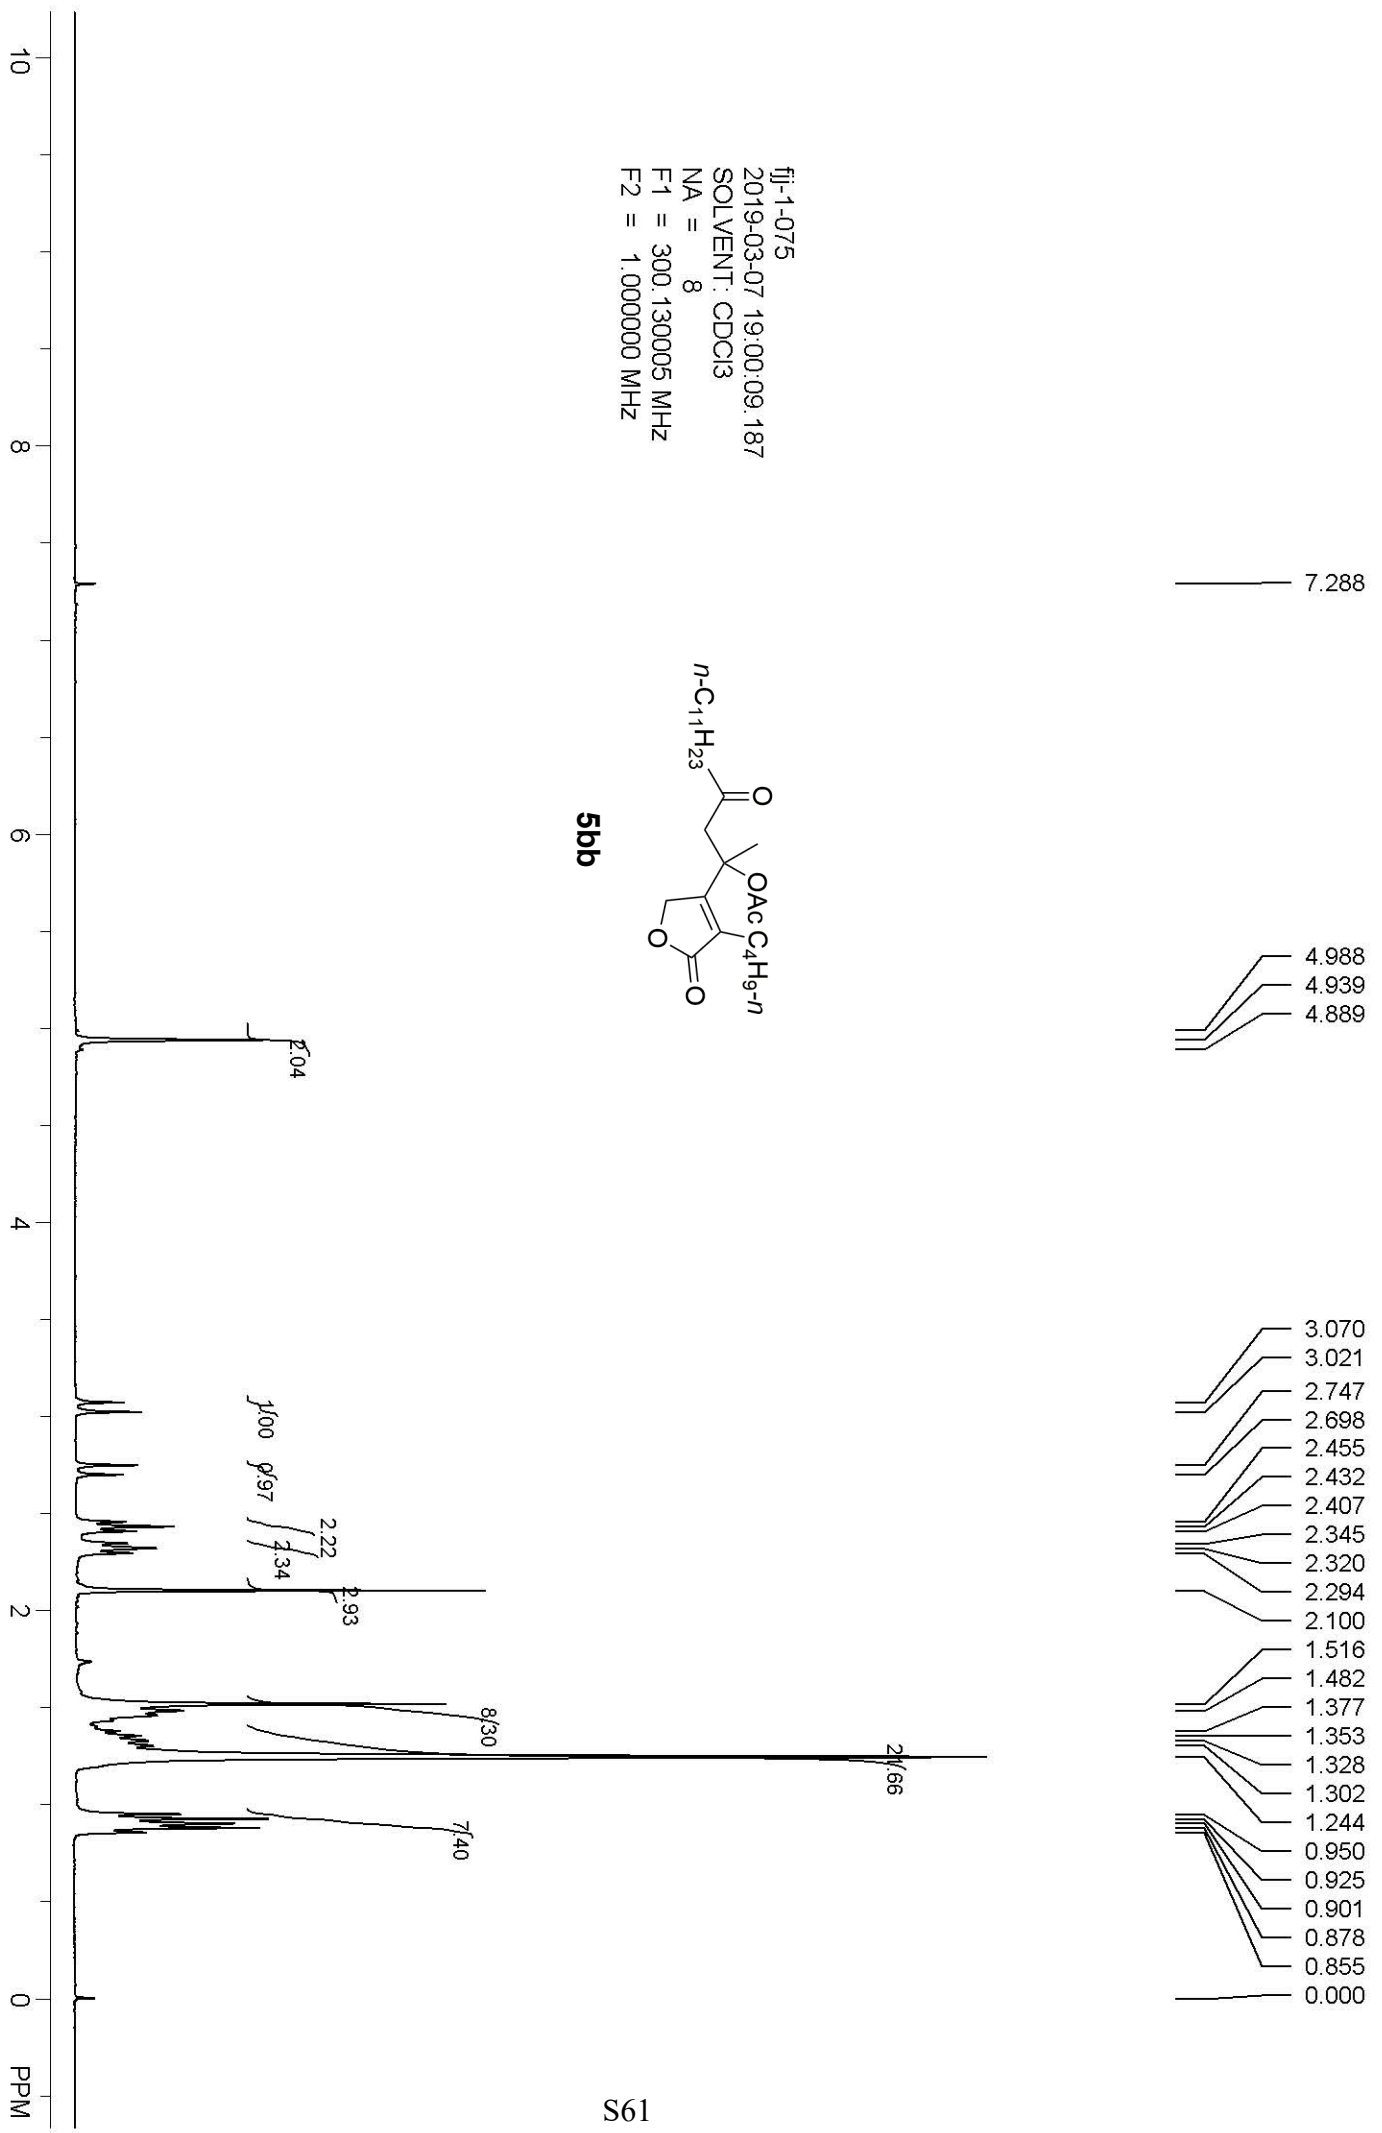

fil-1-075  
2019-03-07 19:15:53.140  
SOLVENT: CDCl3  
NA = 237  
F1 = 75.467751 MHz  
F2 = 1.000000 MHz

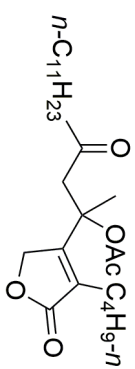

5bb

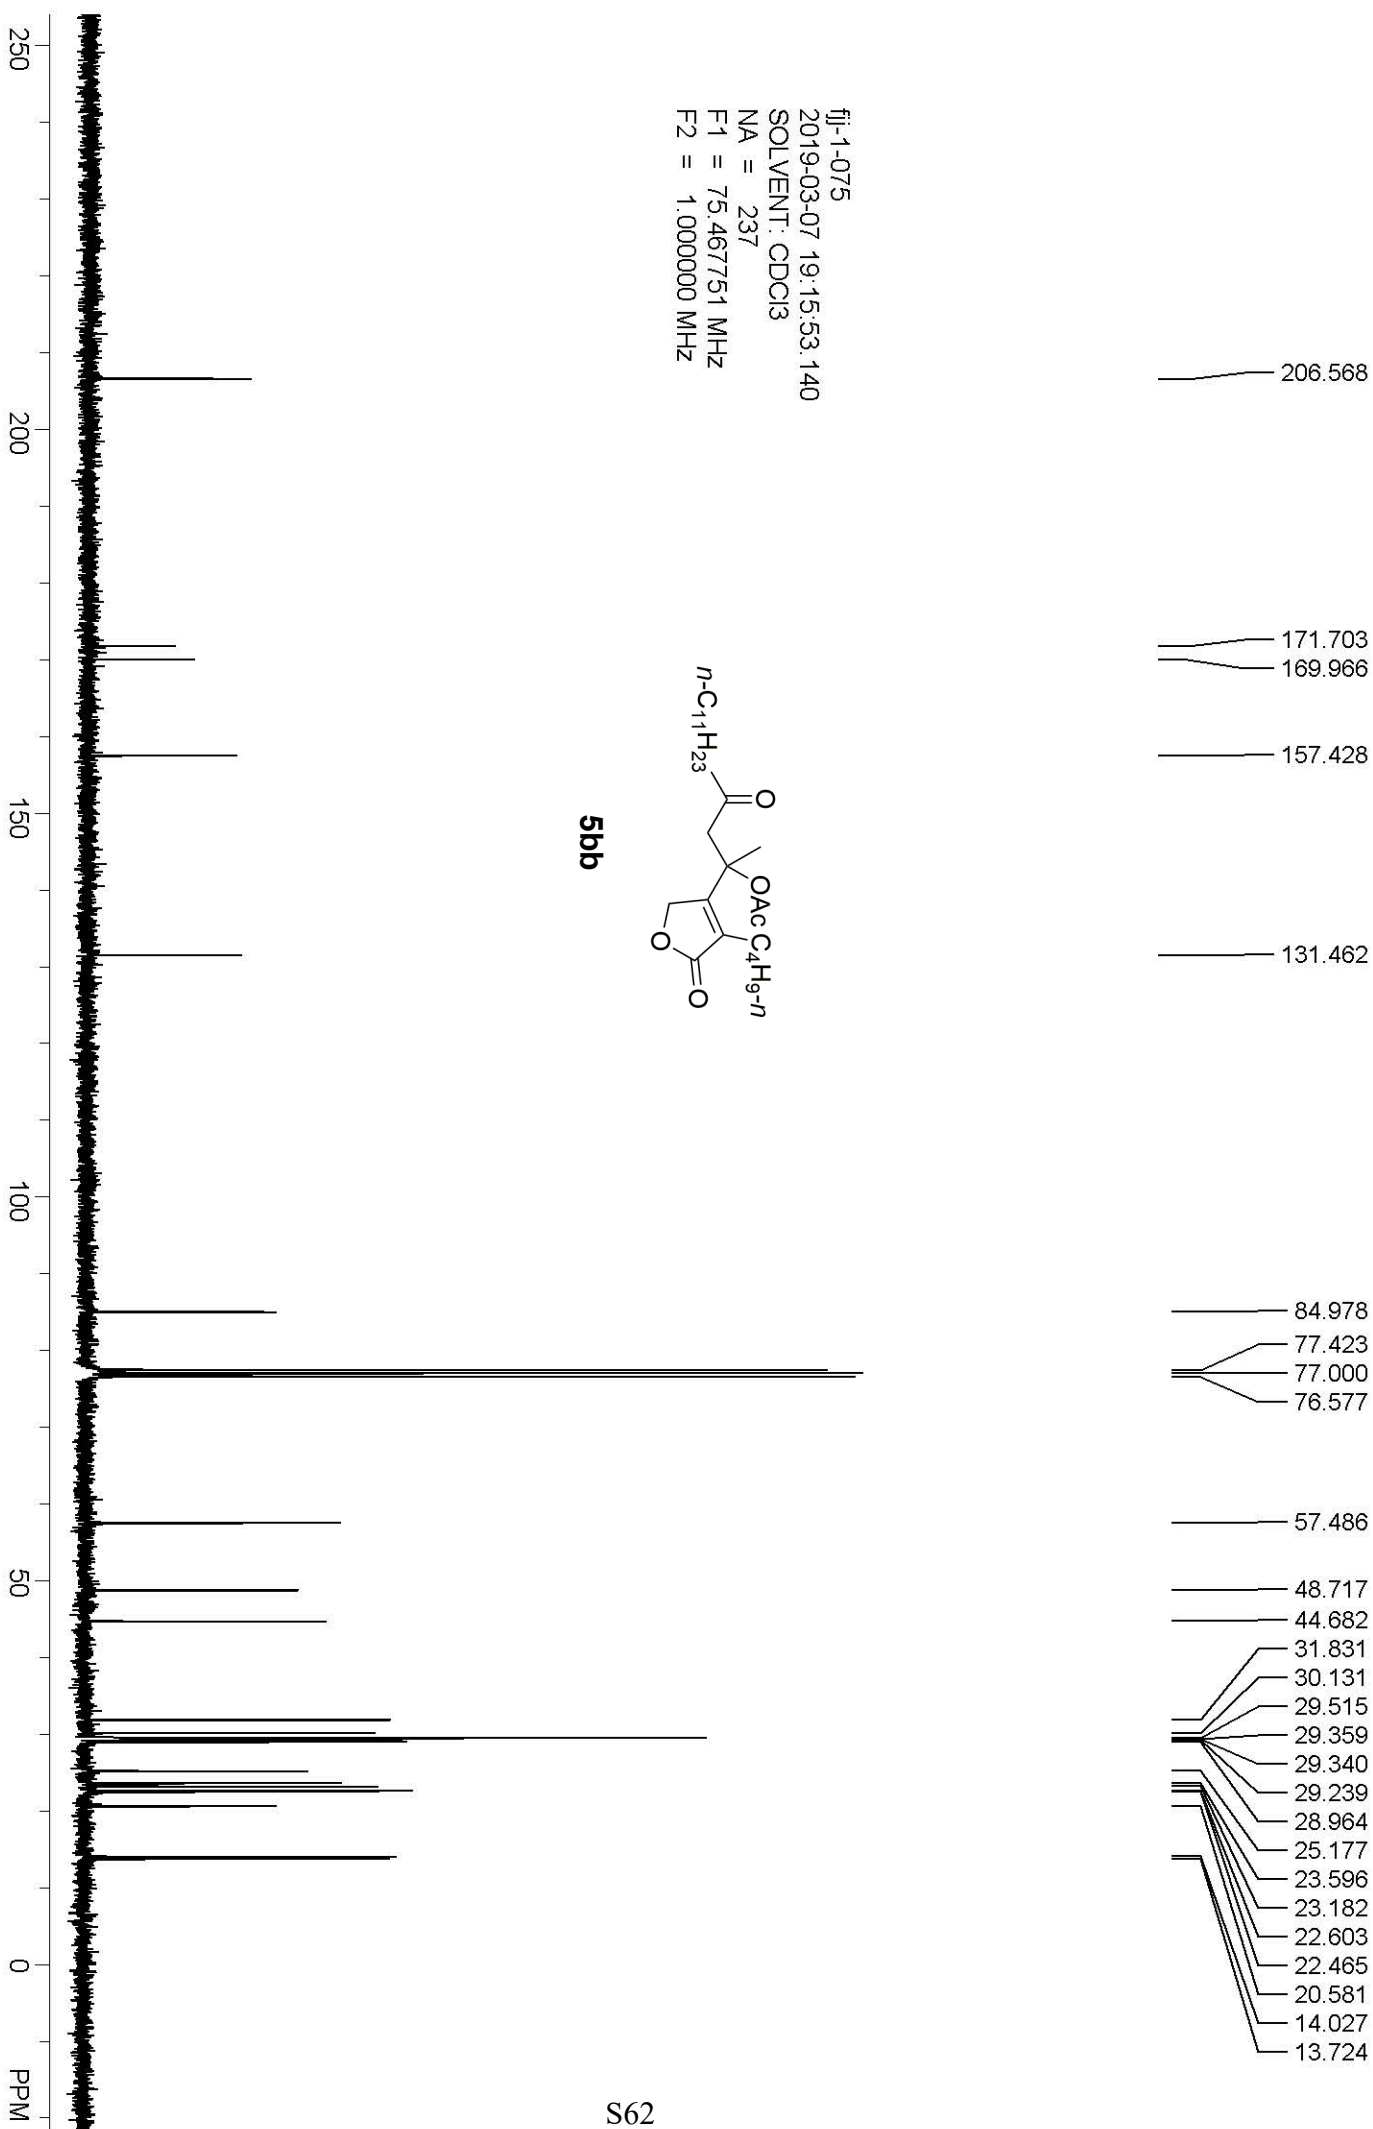

fj-1-076  
 2019-03-08 21:28:42.546  
 SOLVENT: CDCl3  
 NA = 8  
 F1 = 300.130005 MHz  
 F2 = 1.000000 MHz

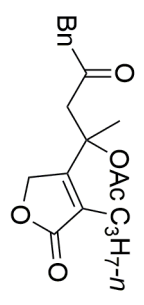

**5ca**

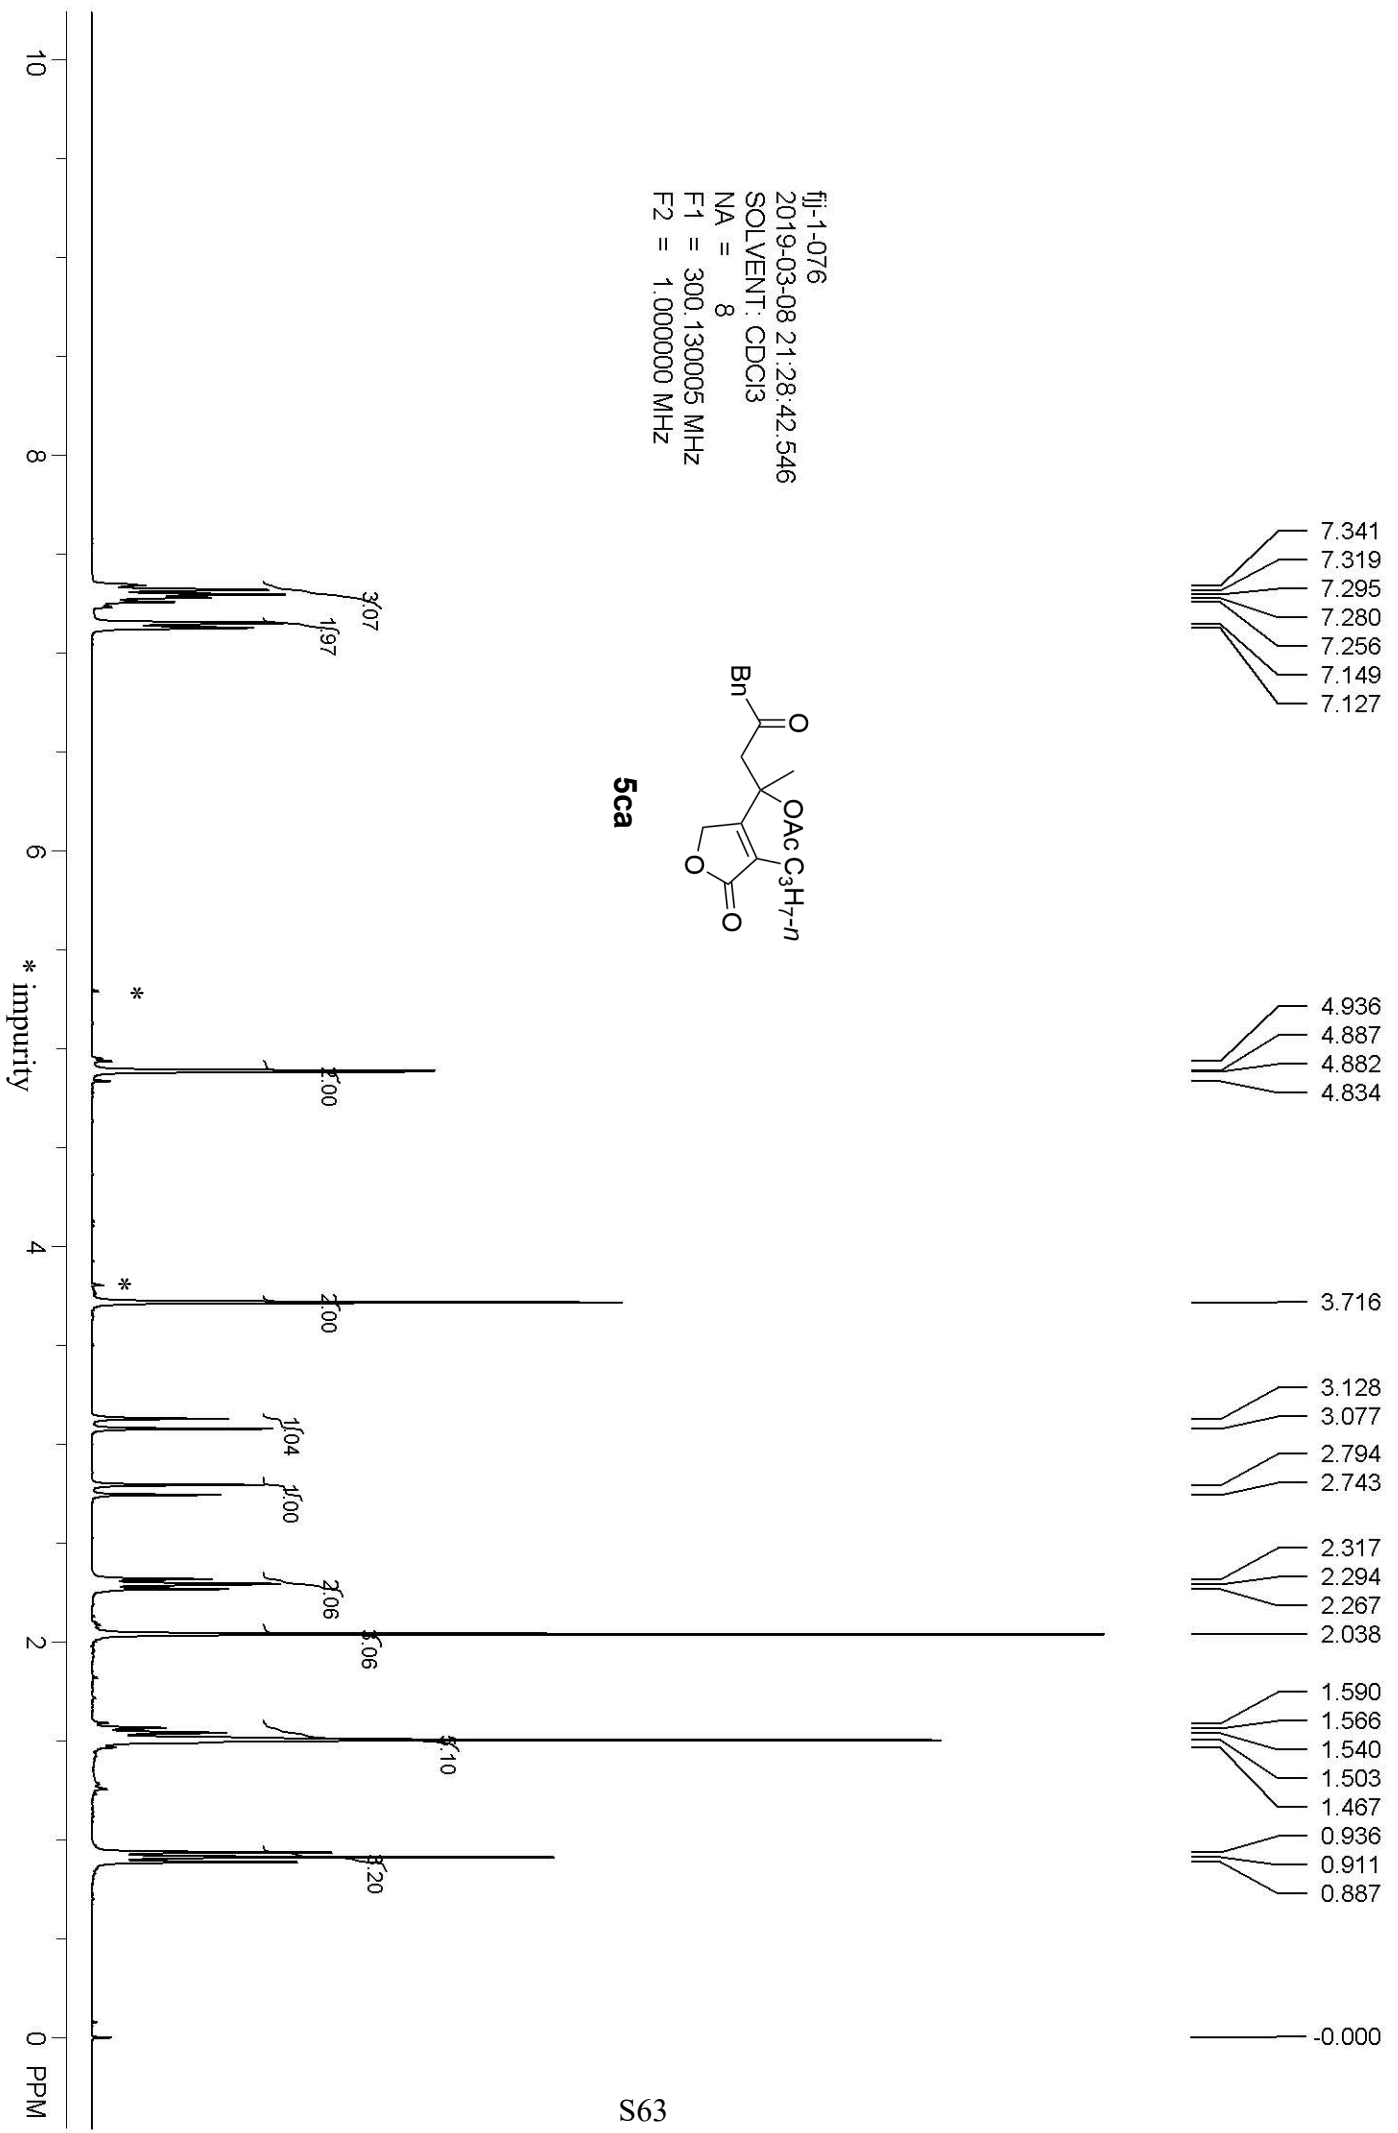

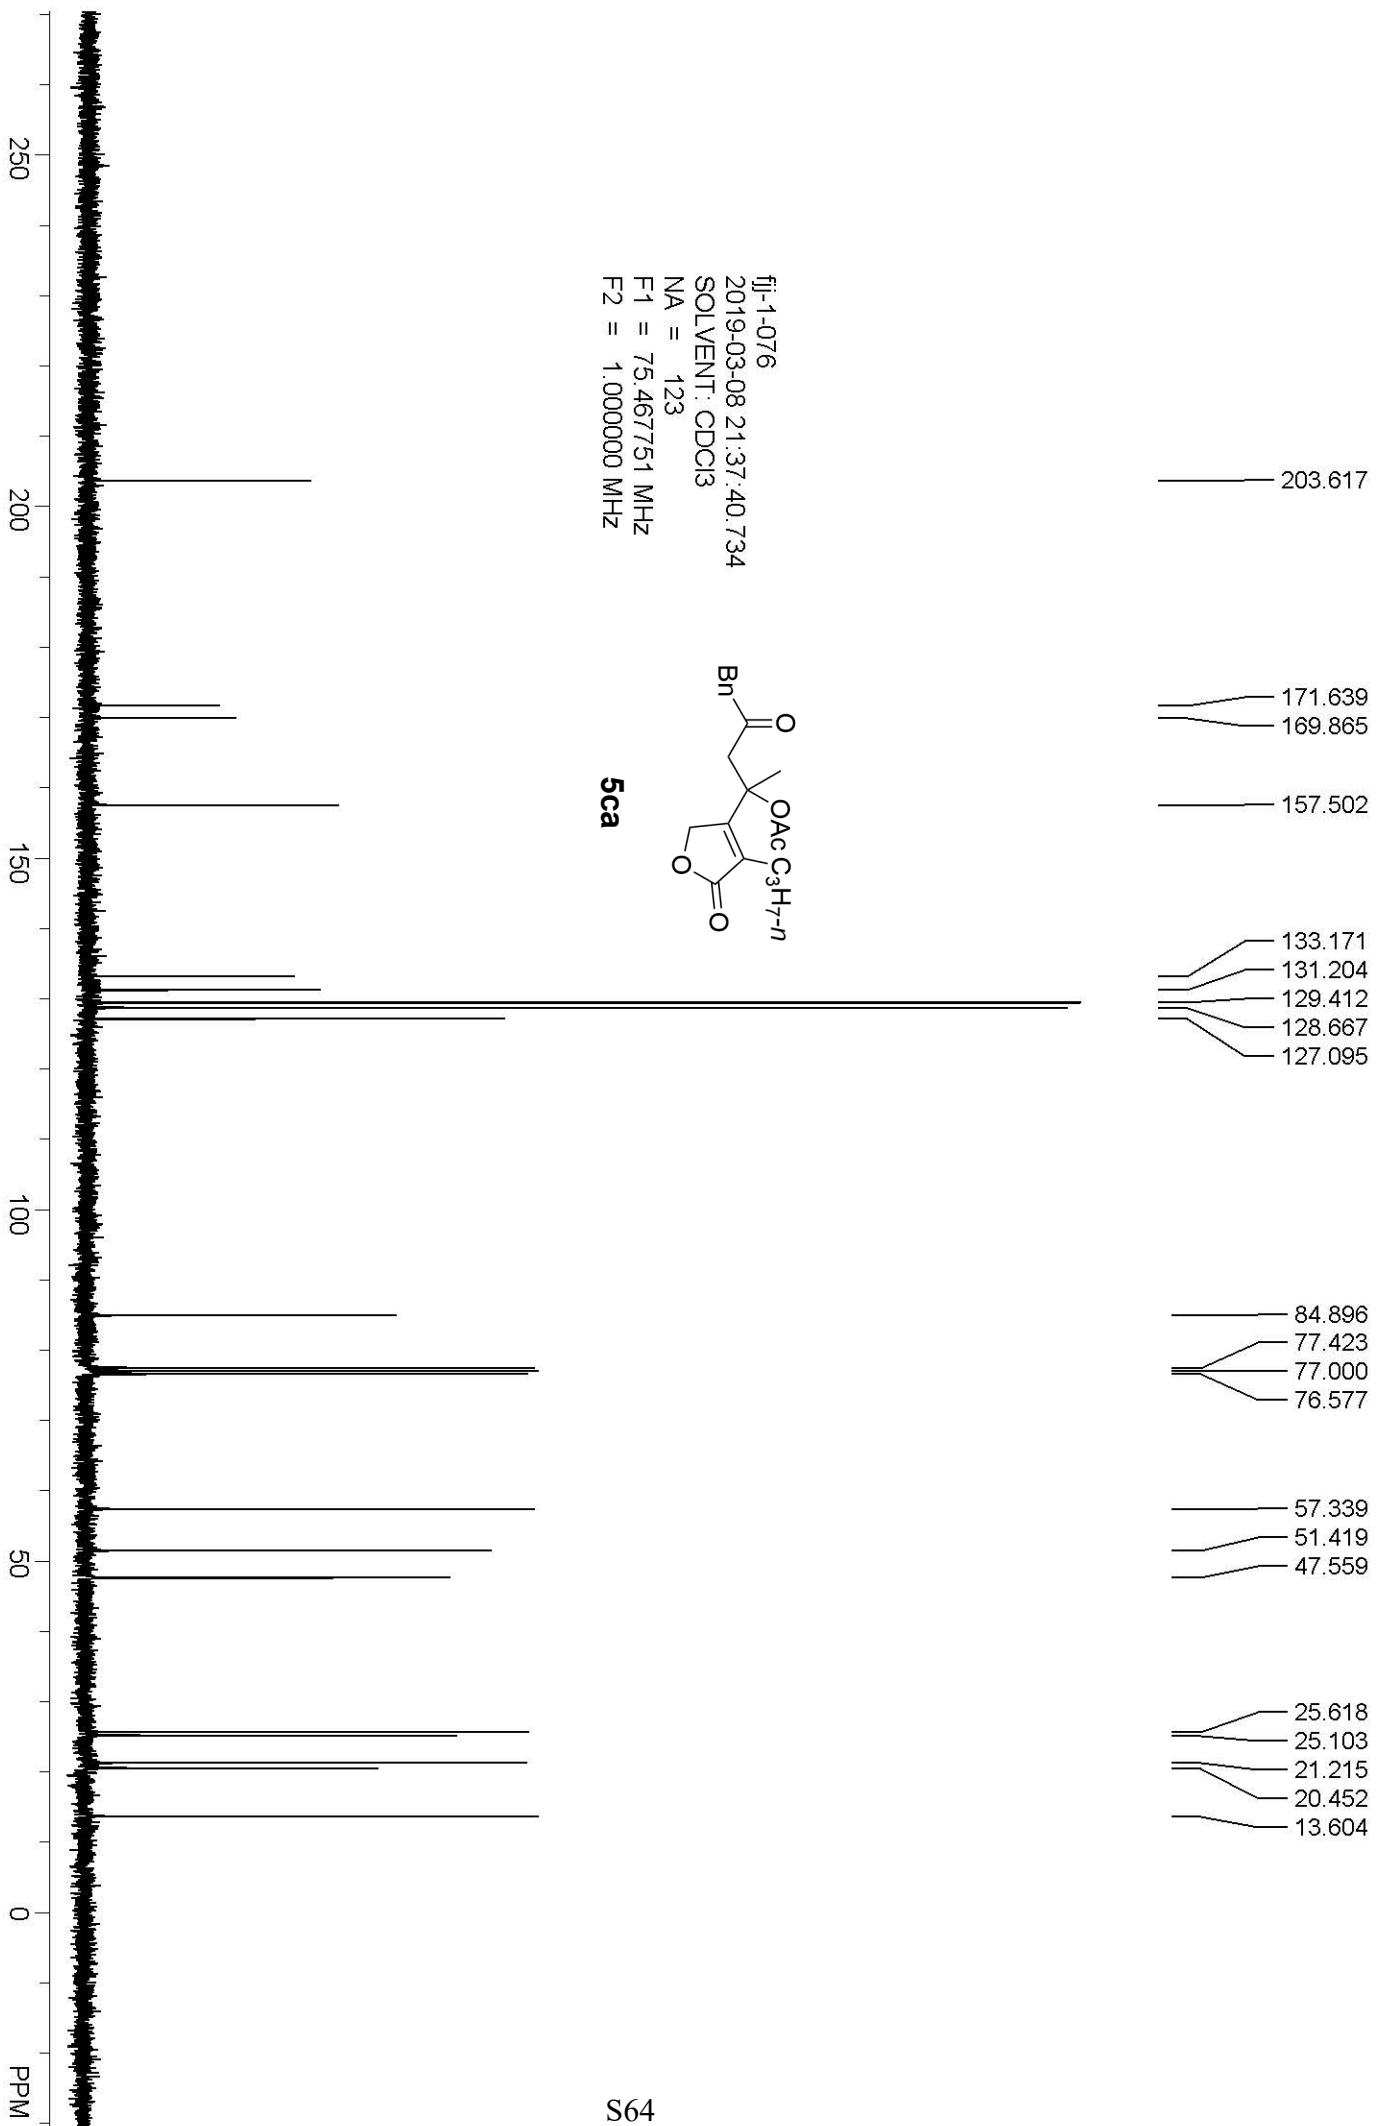



flj-1-087  
 2019-03-15 19:31:31.906  
 SOLVENT: CDCl3  
 NA = 8  
 F1 = 300.130005 MHz  
 F2 = 1.000000 MHz

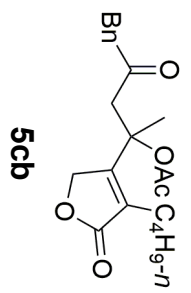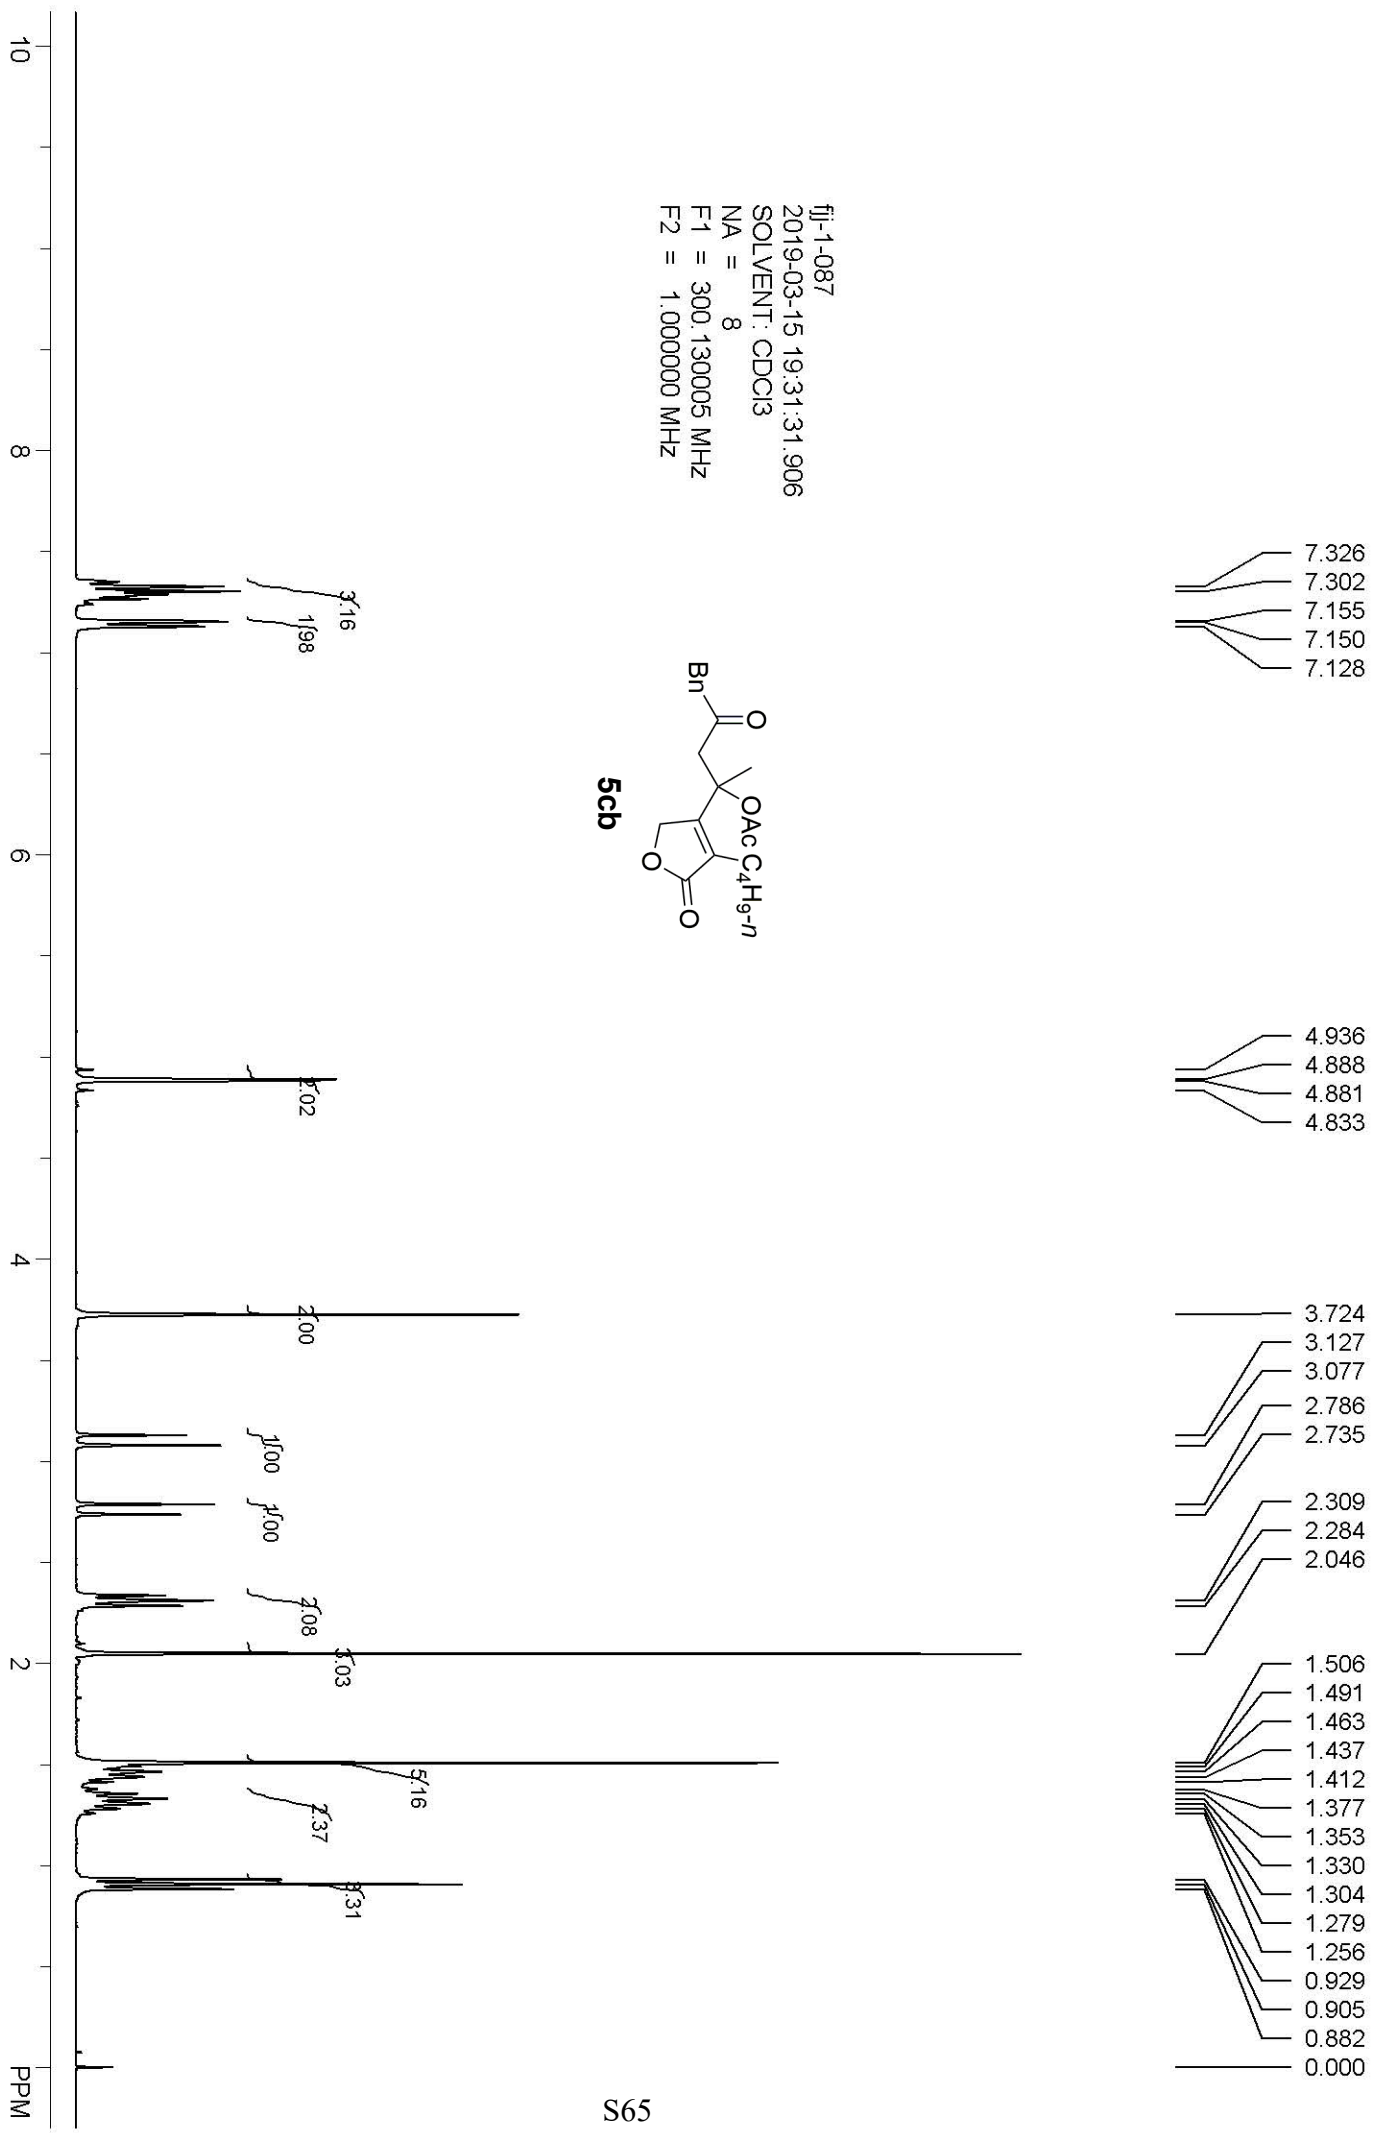

fj-1-087  
2019-03-15 19:39:02.203  
SOLVENT: CDCl3  
NA = 102  
F1 = 75.467751 MHz  
F2 = 1.000000 MHz

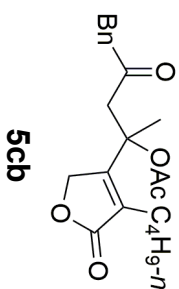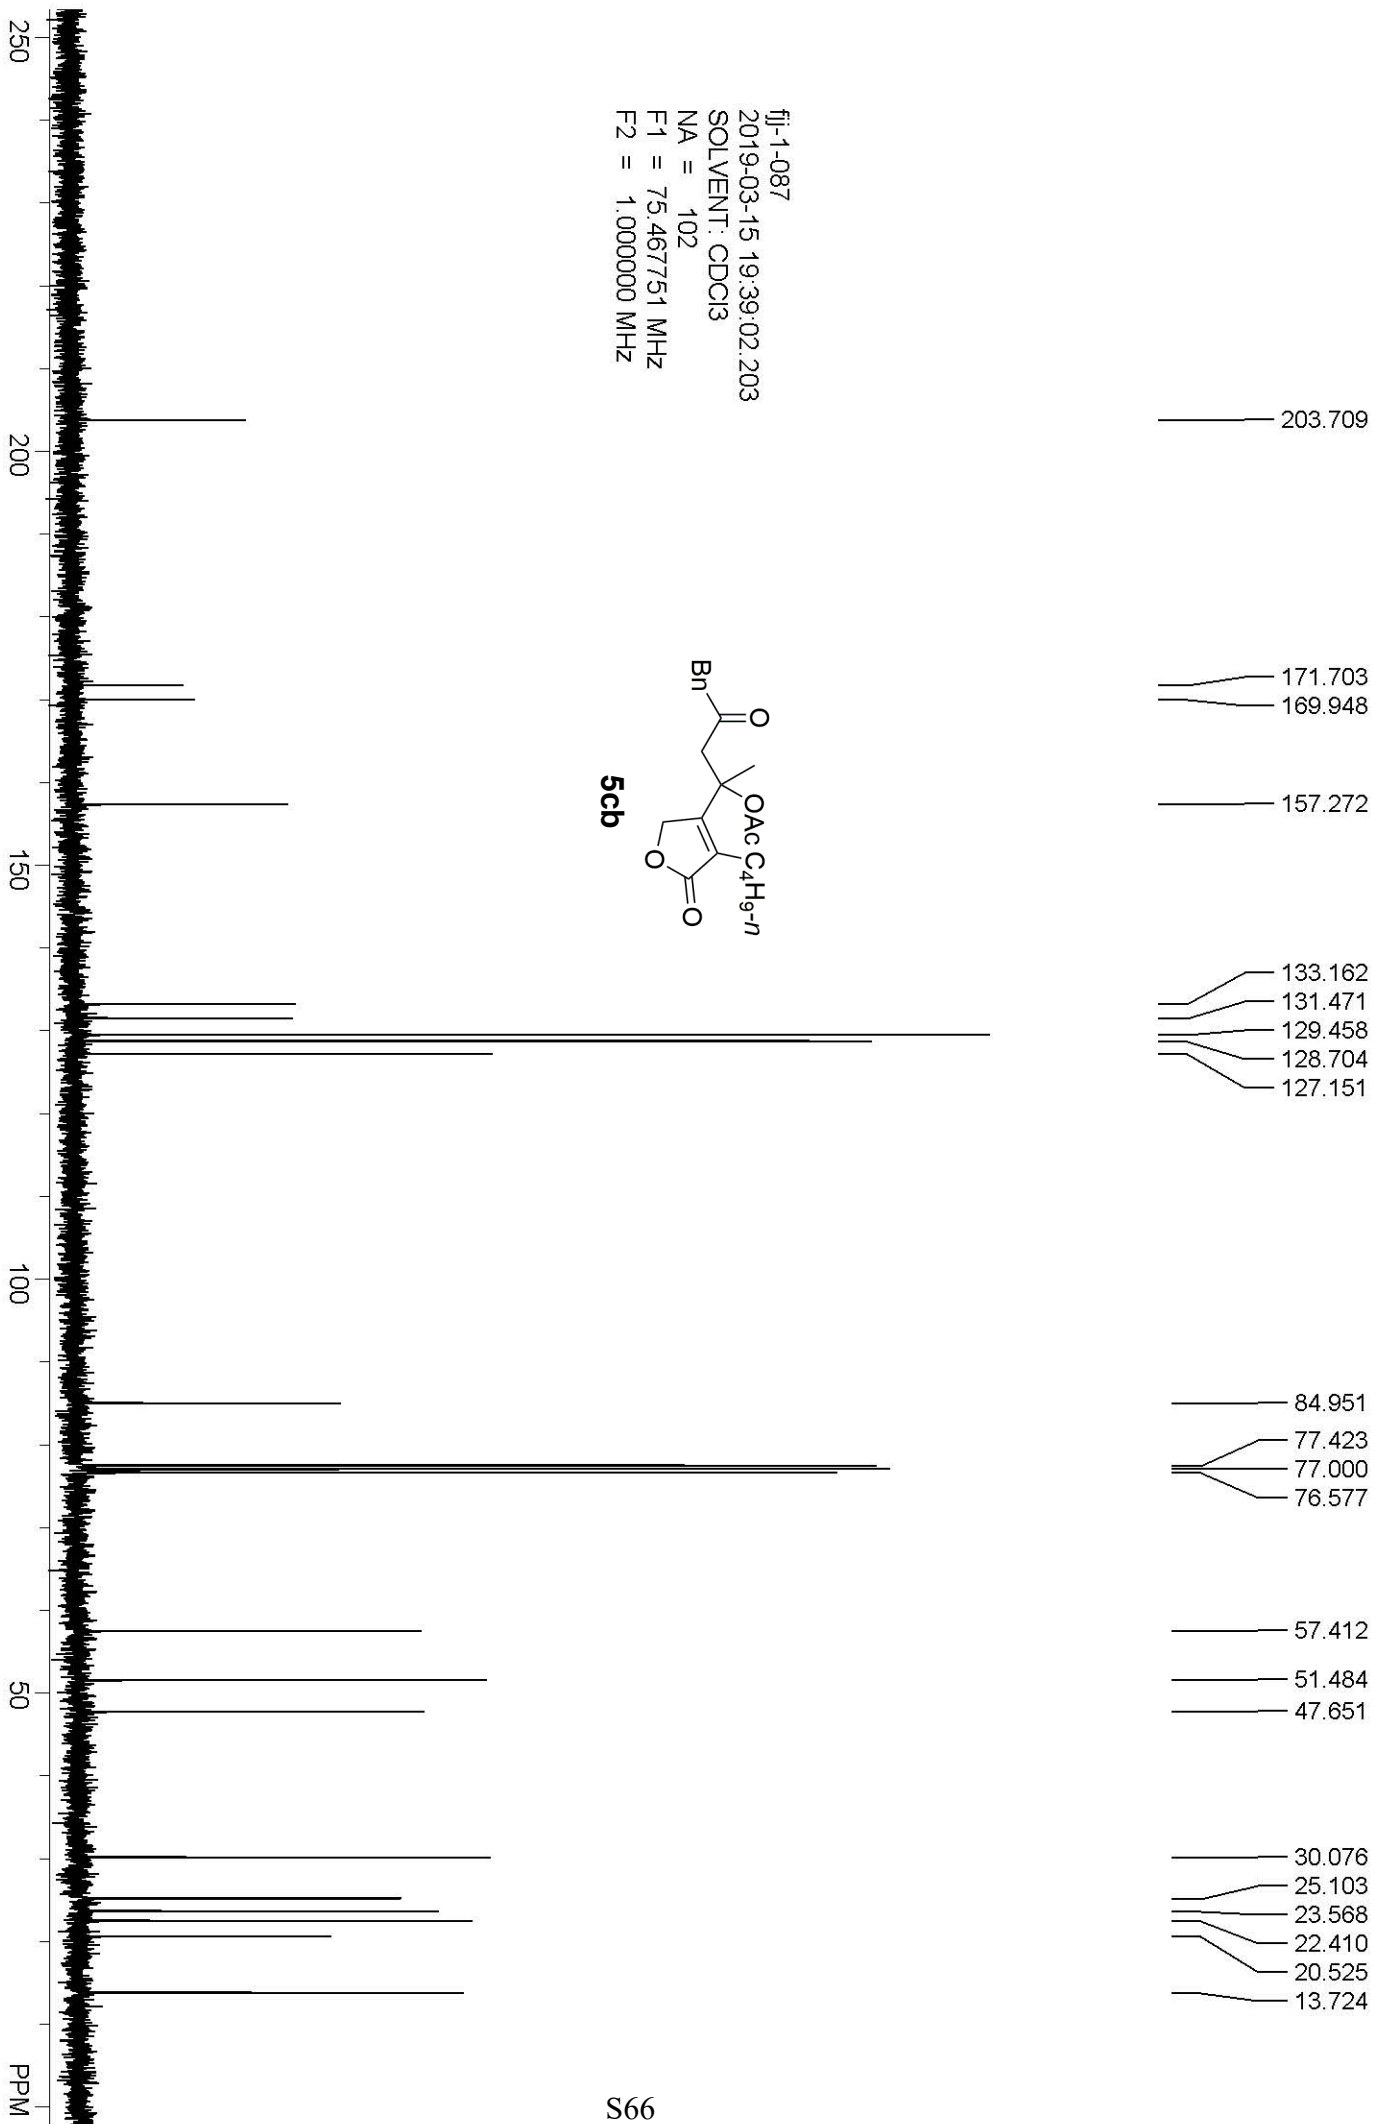

fl-1-066  
2019-02-27 21:05:19.828  
SOLVENT: CDCl3  
NA = 8  
F1 = 300.130005 MHz  
F2 = 1.000000 MHz

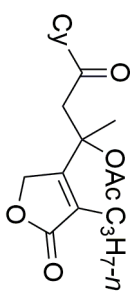

**Sda**

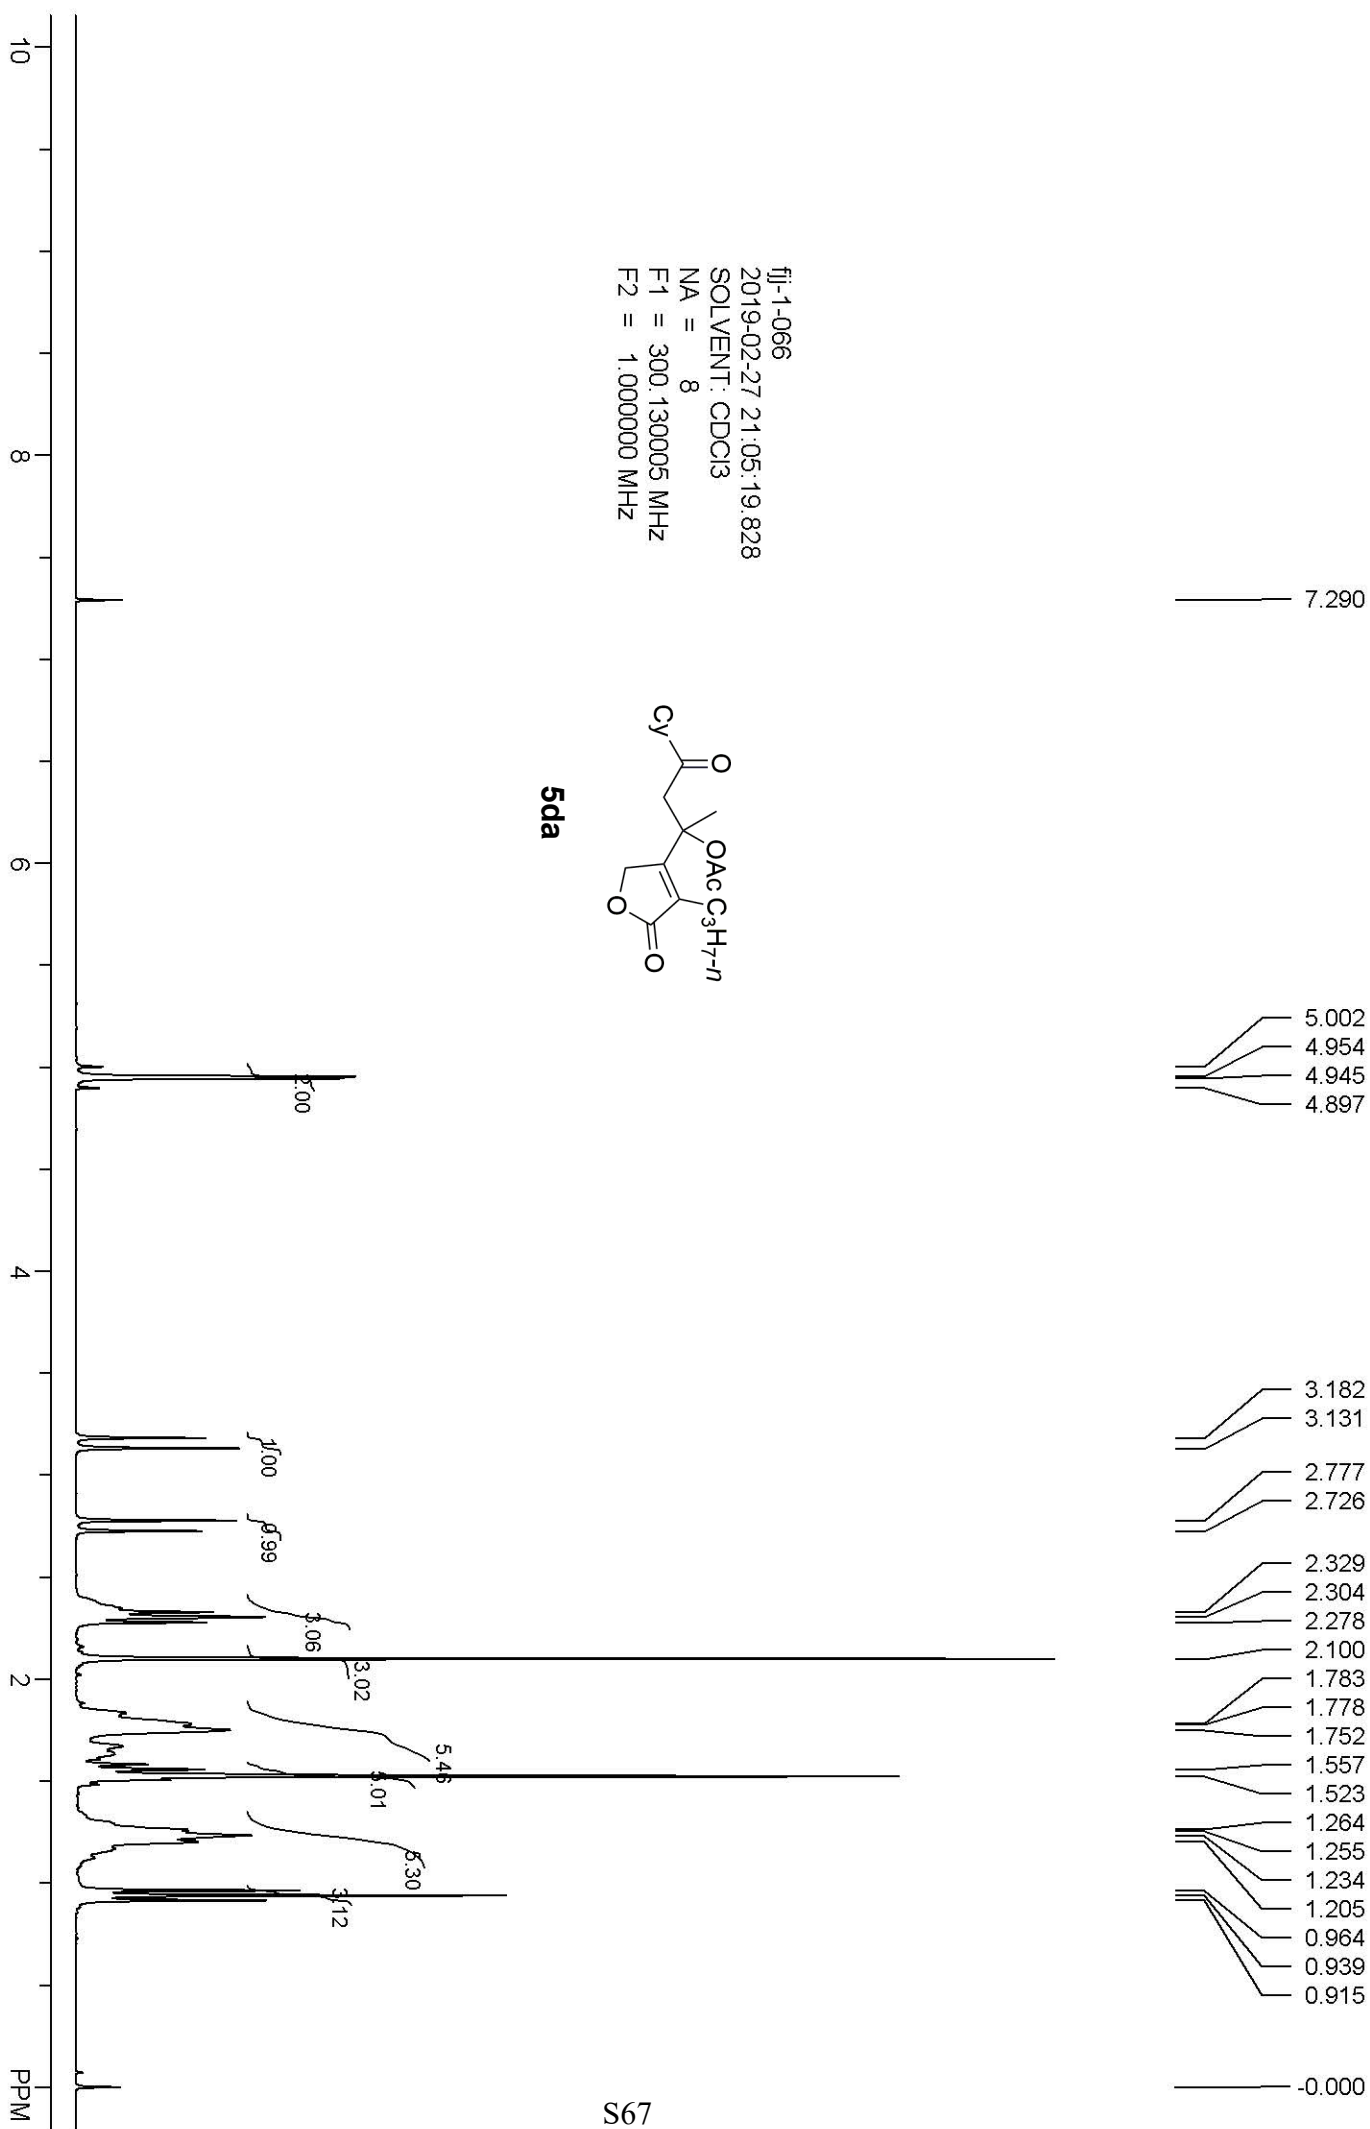

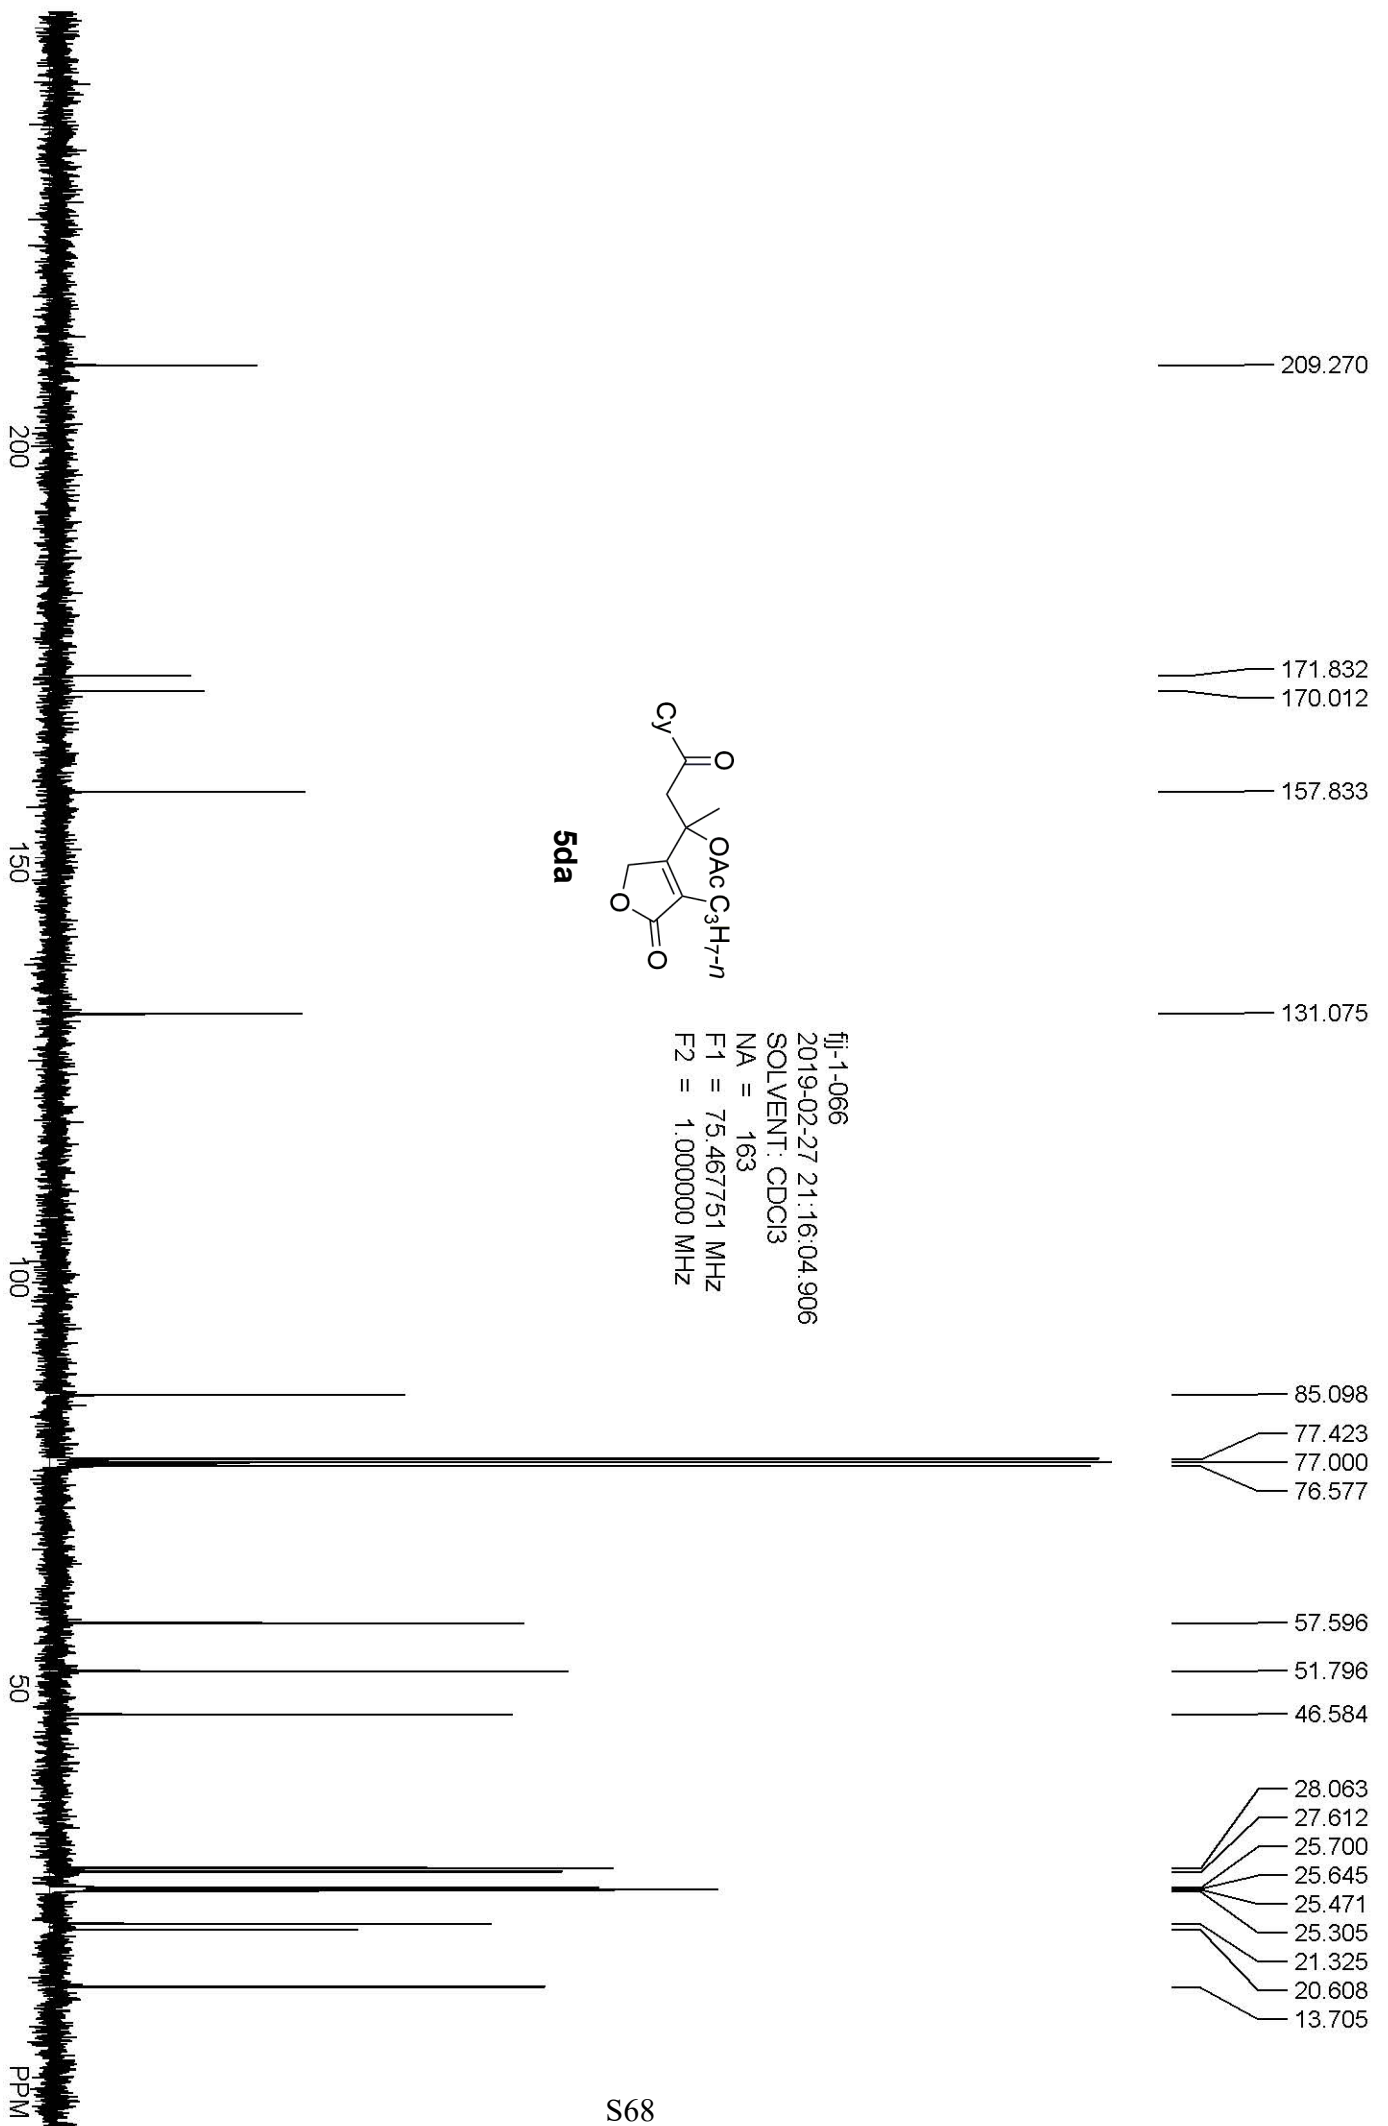

fj-1-068  
 2019-02-28 14:11:08.140  
 SOLVENT: CDCl3  
 NA = 8  
 F1 = 300.130005 MHz  
 F2 = 1.000000 MHz

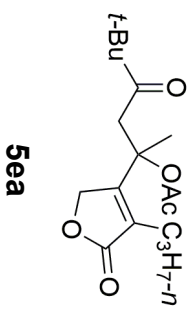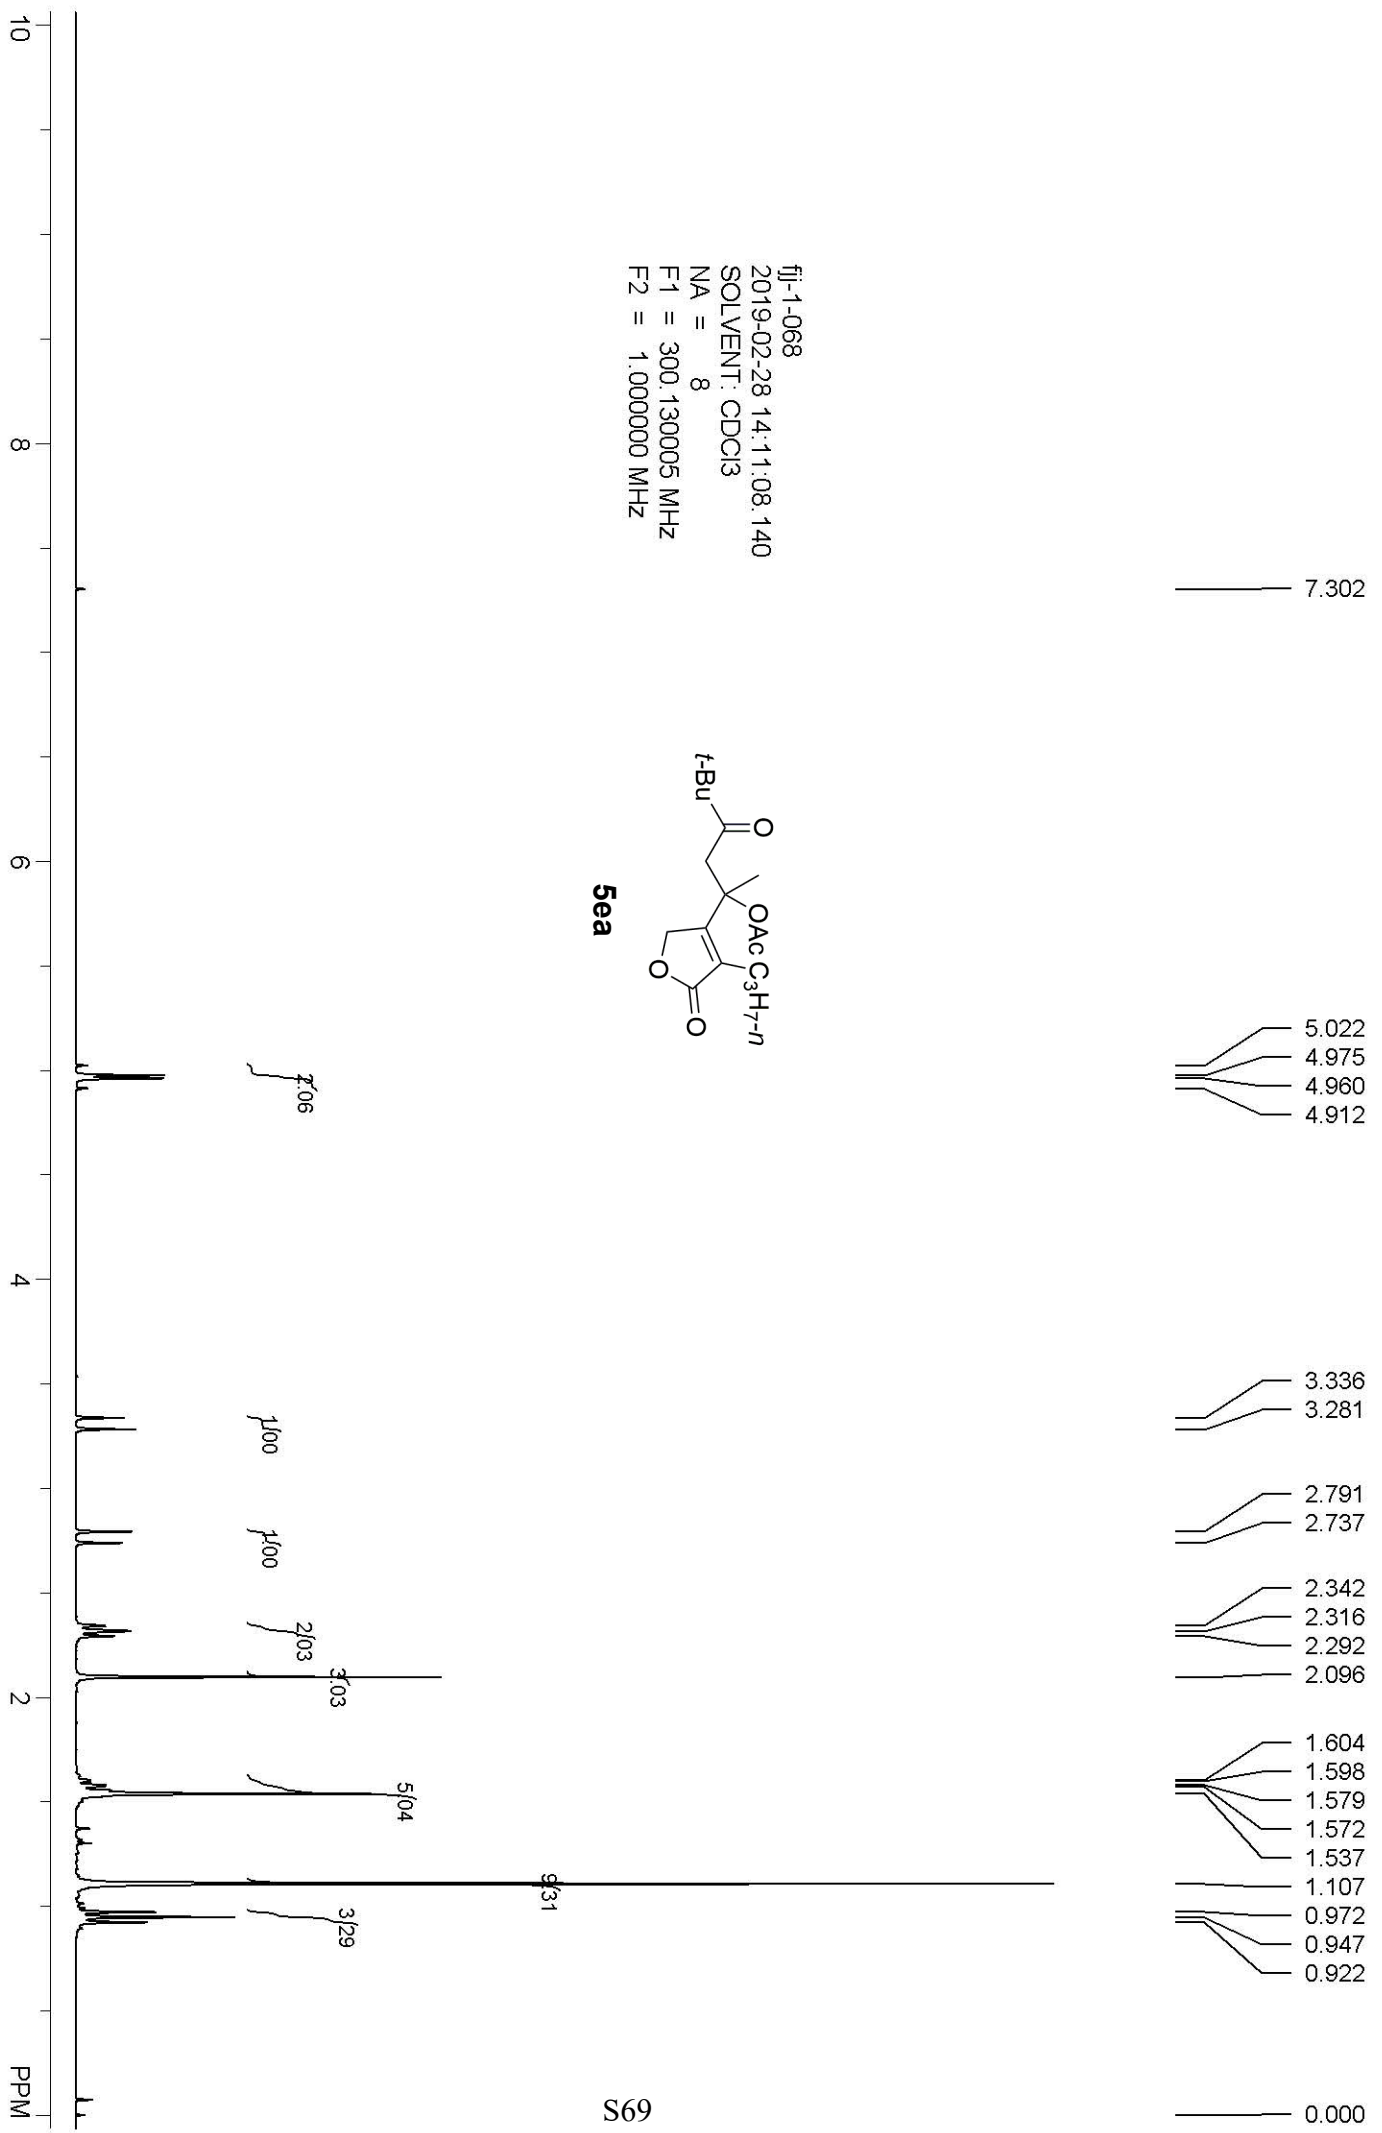

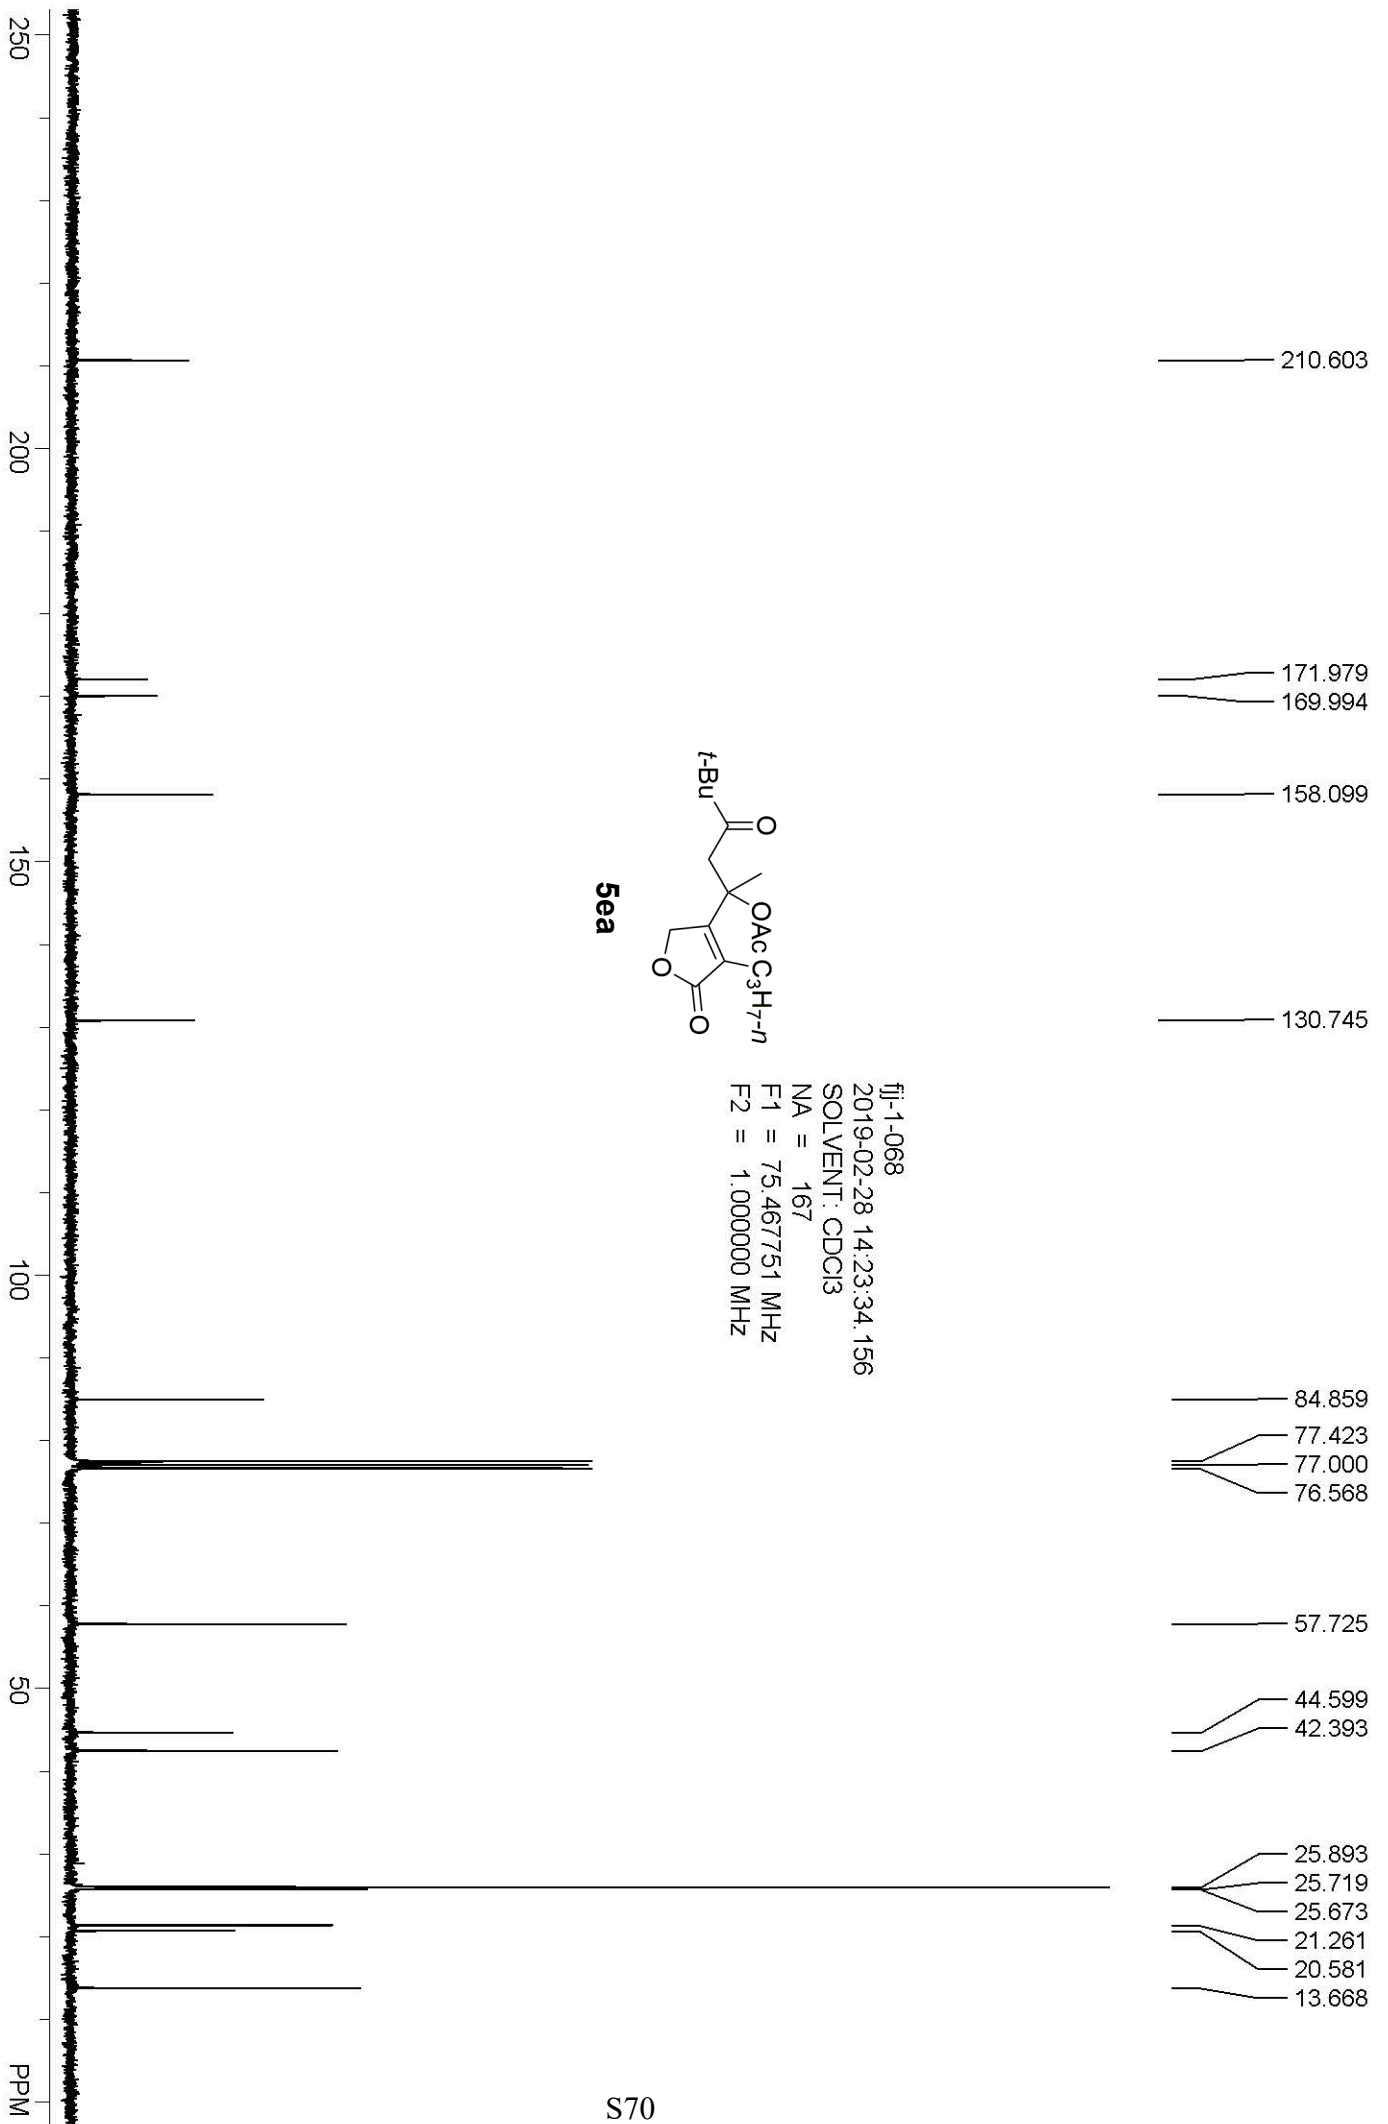

fj-1-072  
 2019-03-05 16:27:23.968  
 SOLVENT: CDCl3  
 NA = 8  
 F1 = 300.130005 MHz  
 F2 = 1.000000 MHz

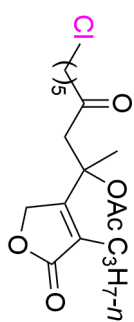

**5fa**

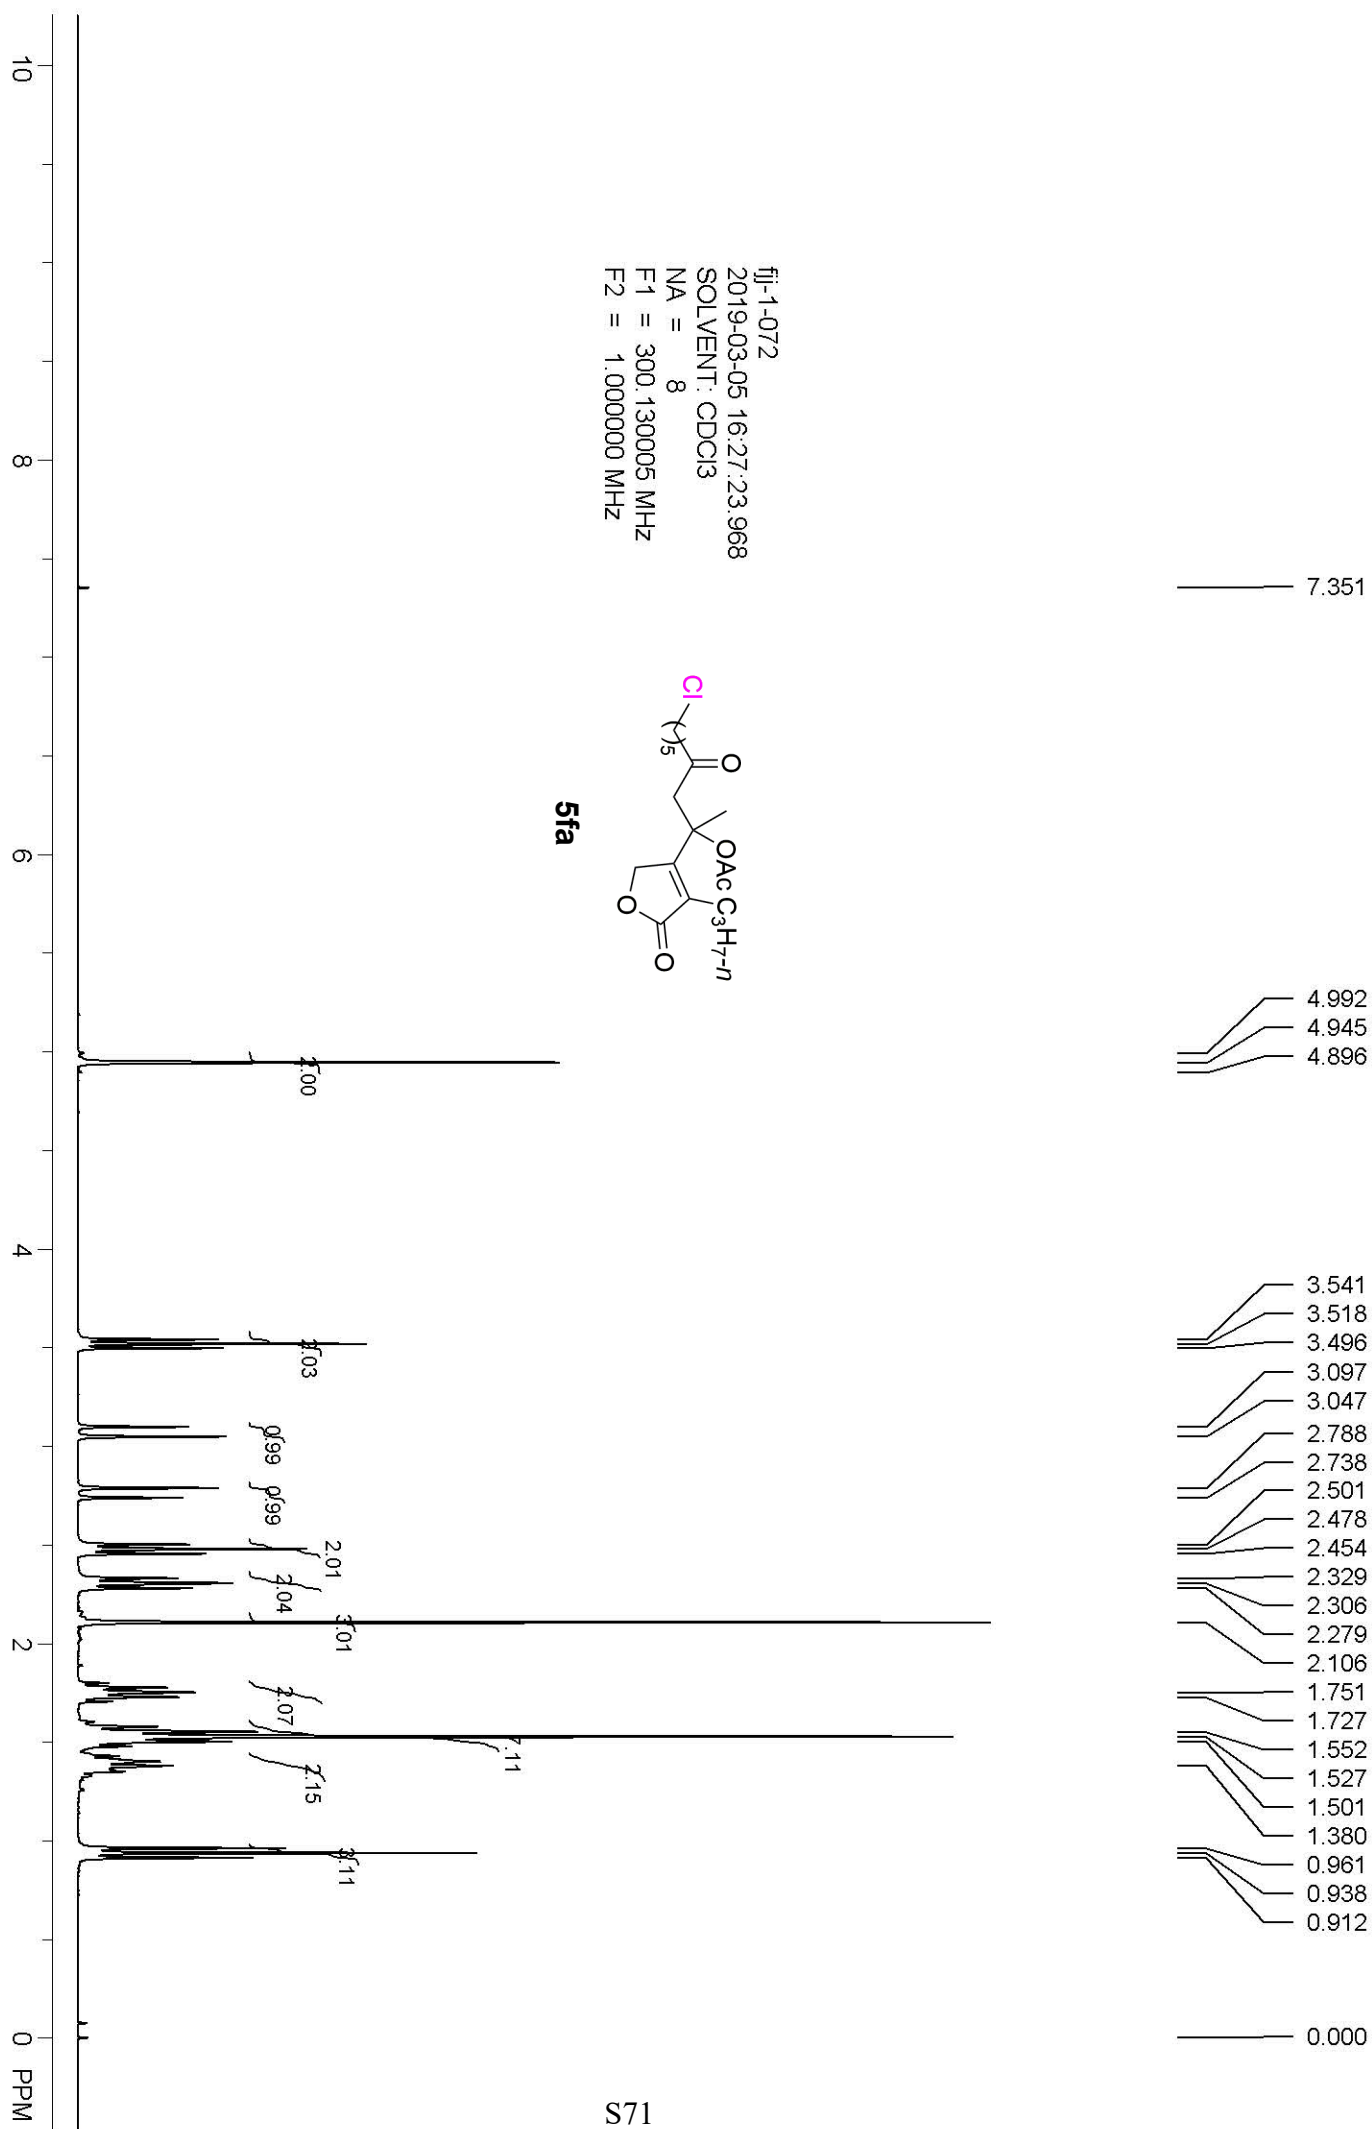

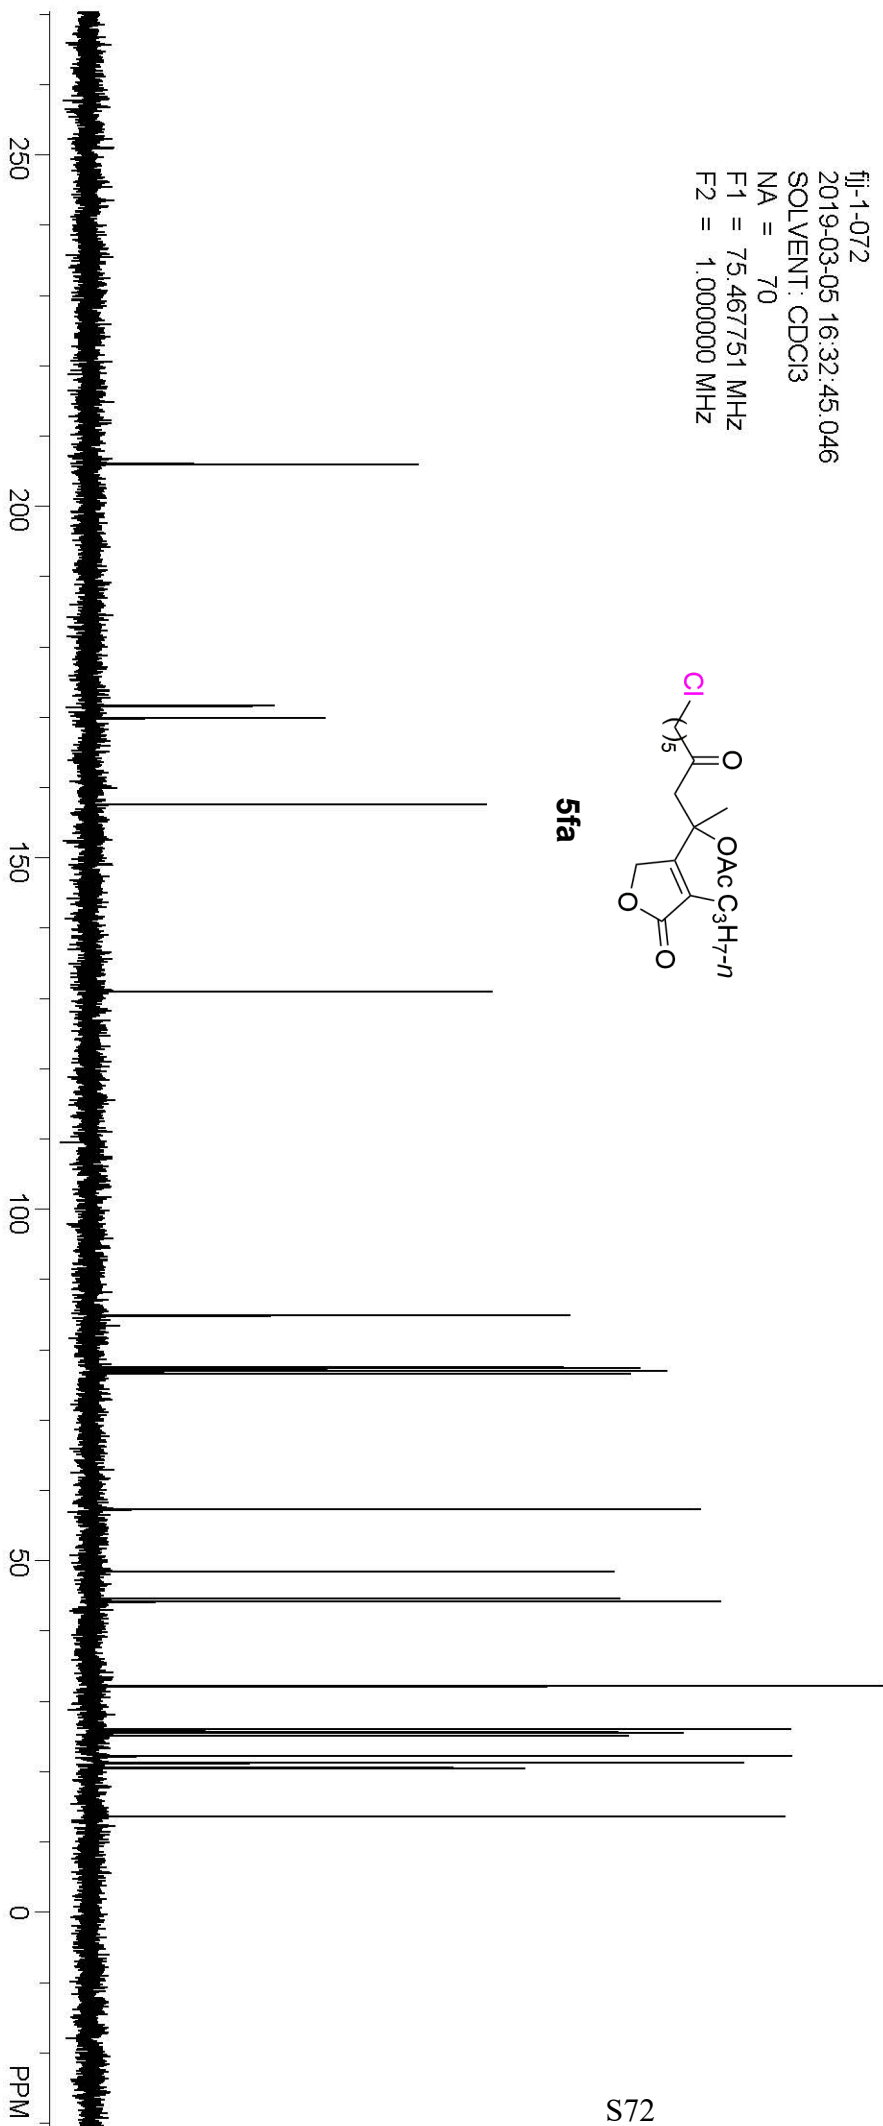

205.934

171.565  
169.801

157.557

130.947

84.831  
77.423  
77.000  
76.577

57.265

48.395  
44.562  
44.121

32.070  
25.939  
25.489  
25.039  
22.125  
21.151  
20.434  
13.530



fj-1-111  
 2019-04-05 18:34:46.718  
 SOLVENT: CDCl3  
 NA = 8  
 F1 = 300.130005 MHz  
 F2 = 1.000000 MHz

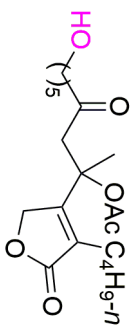

**5glb**

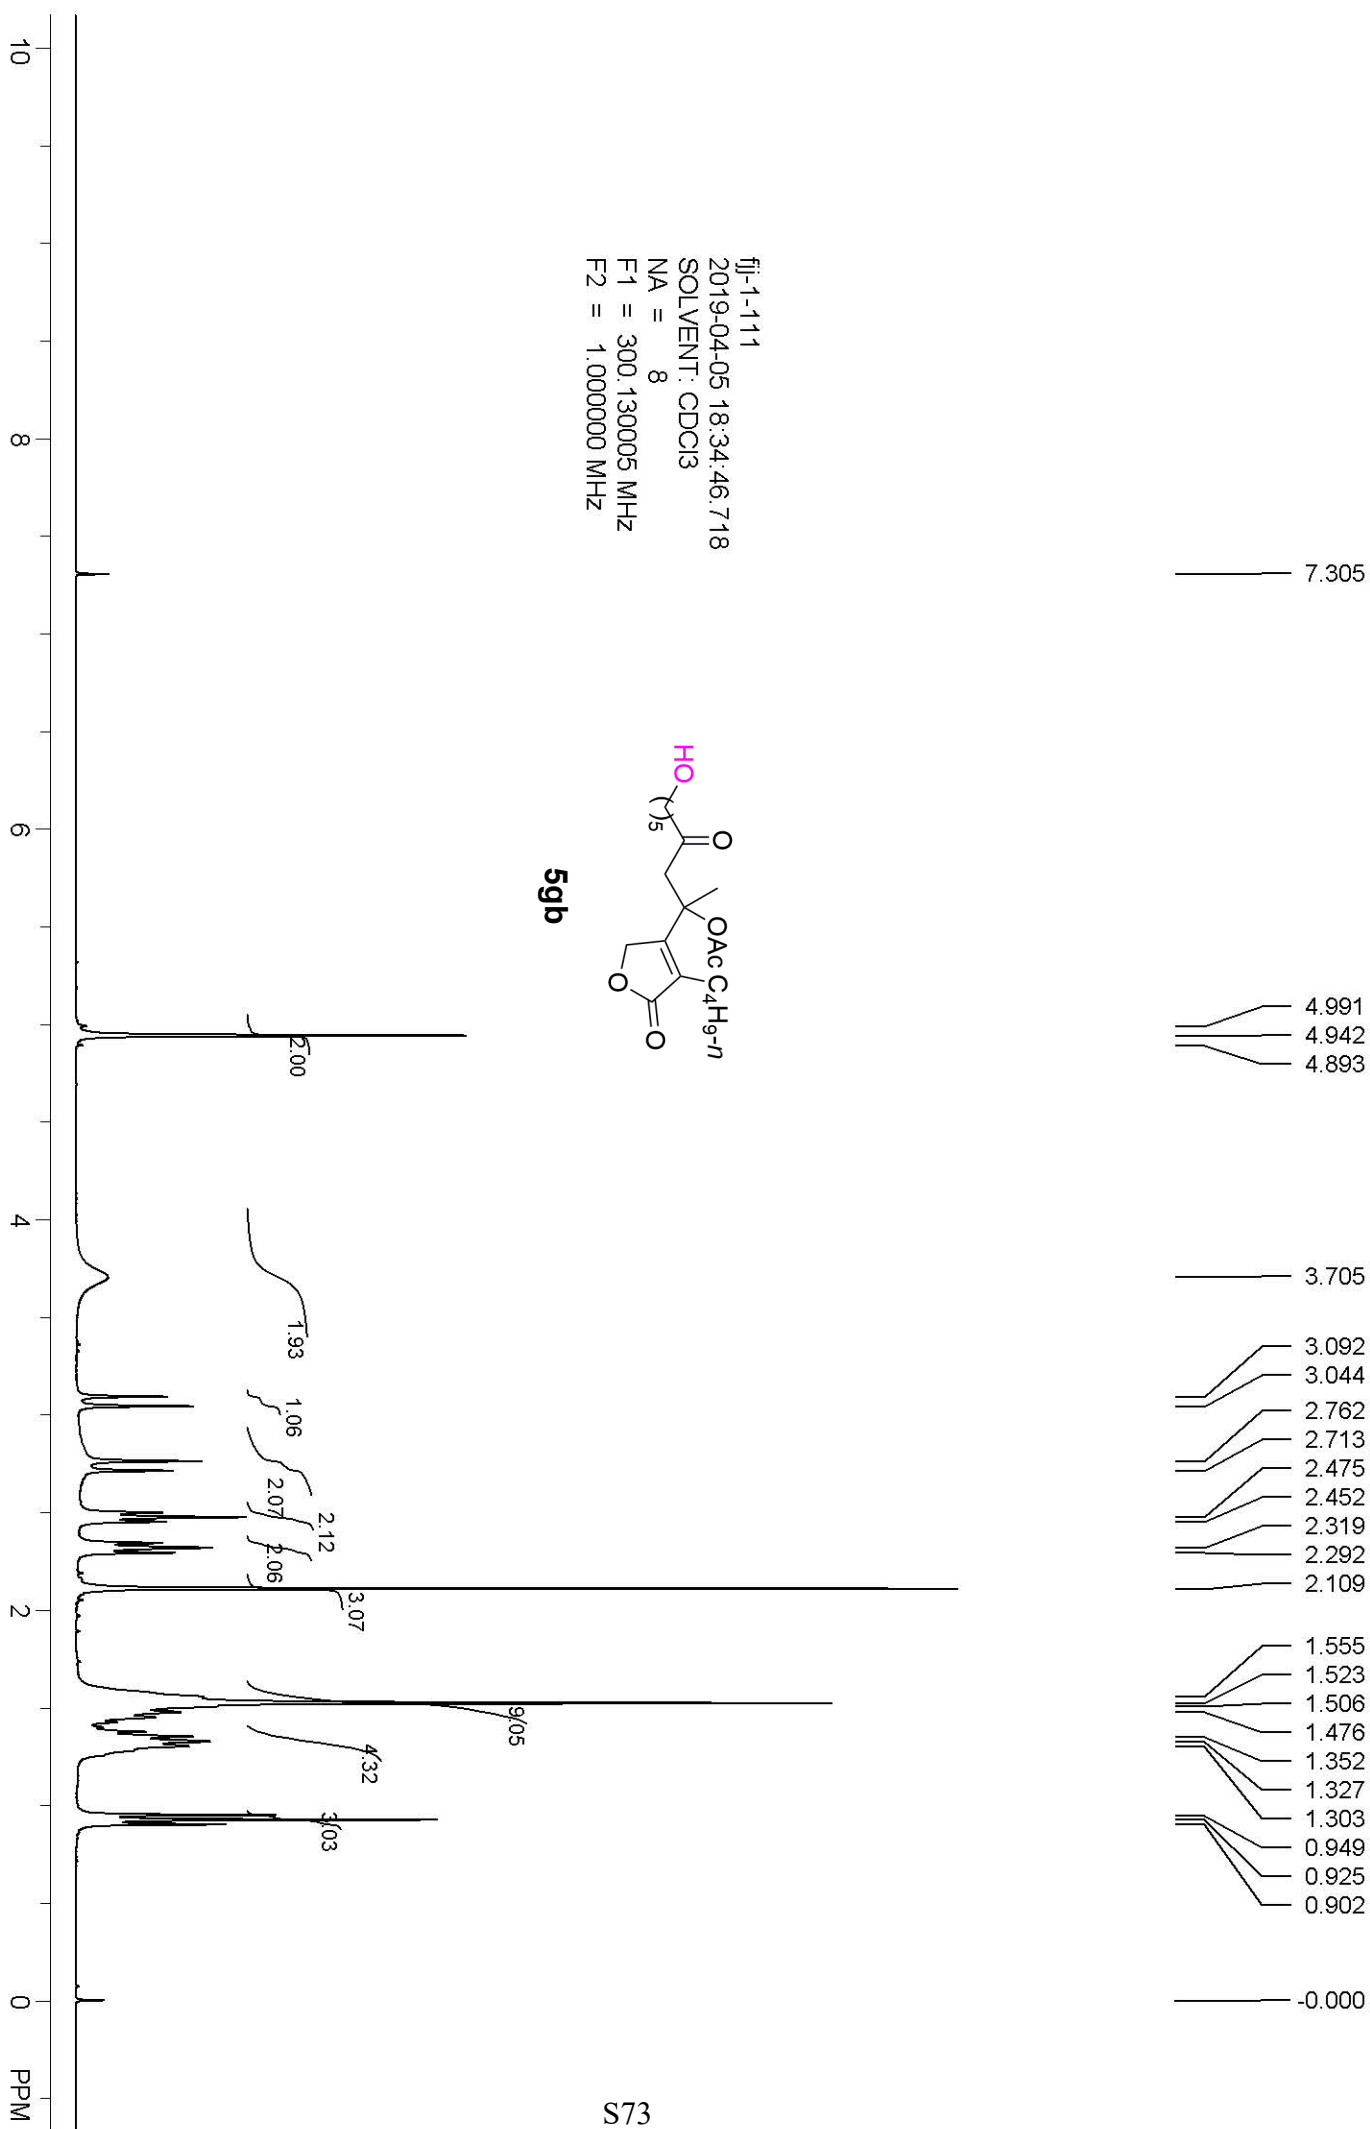

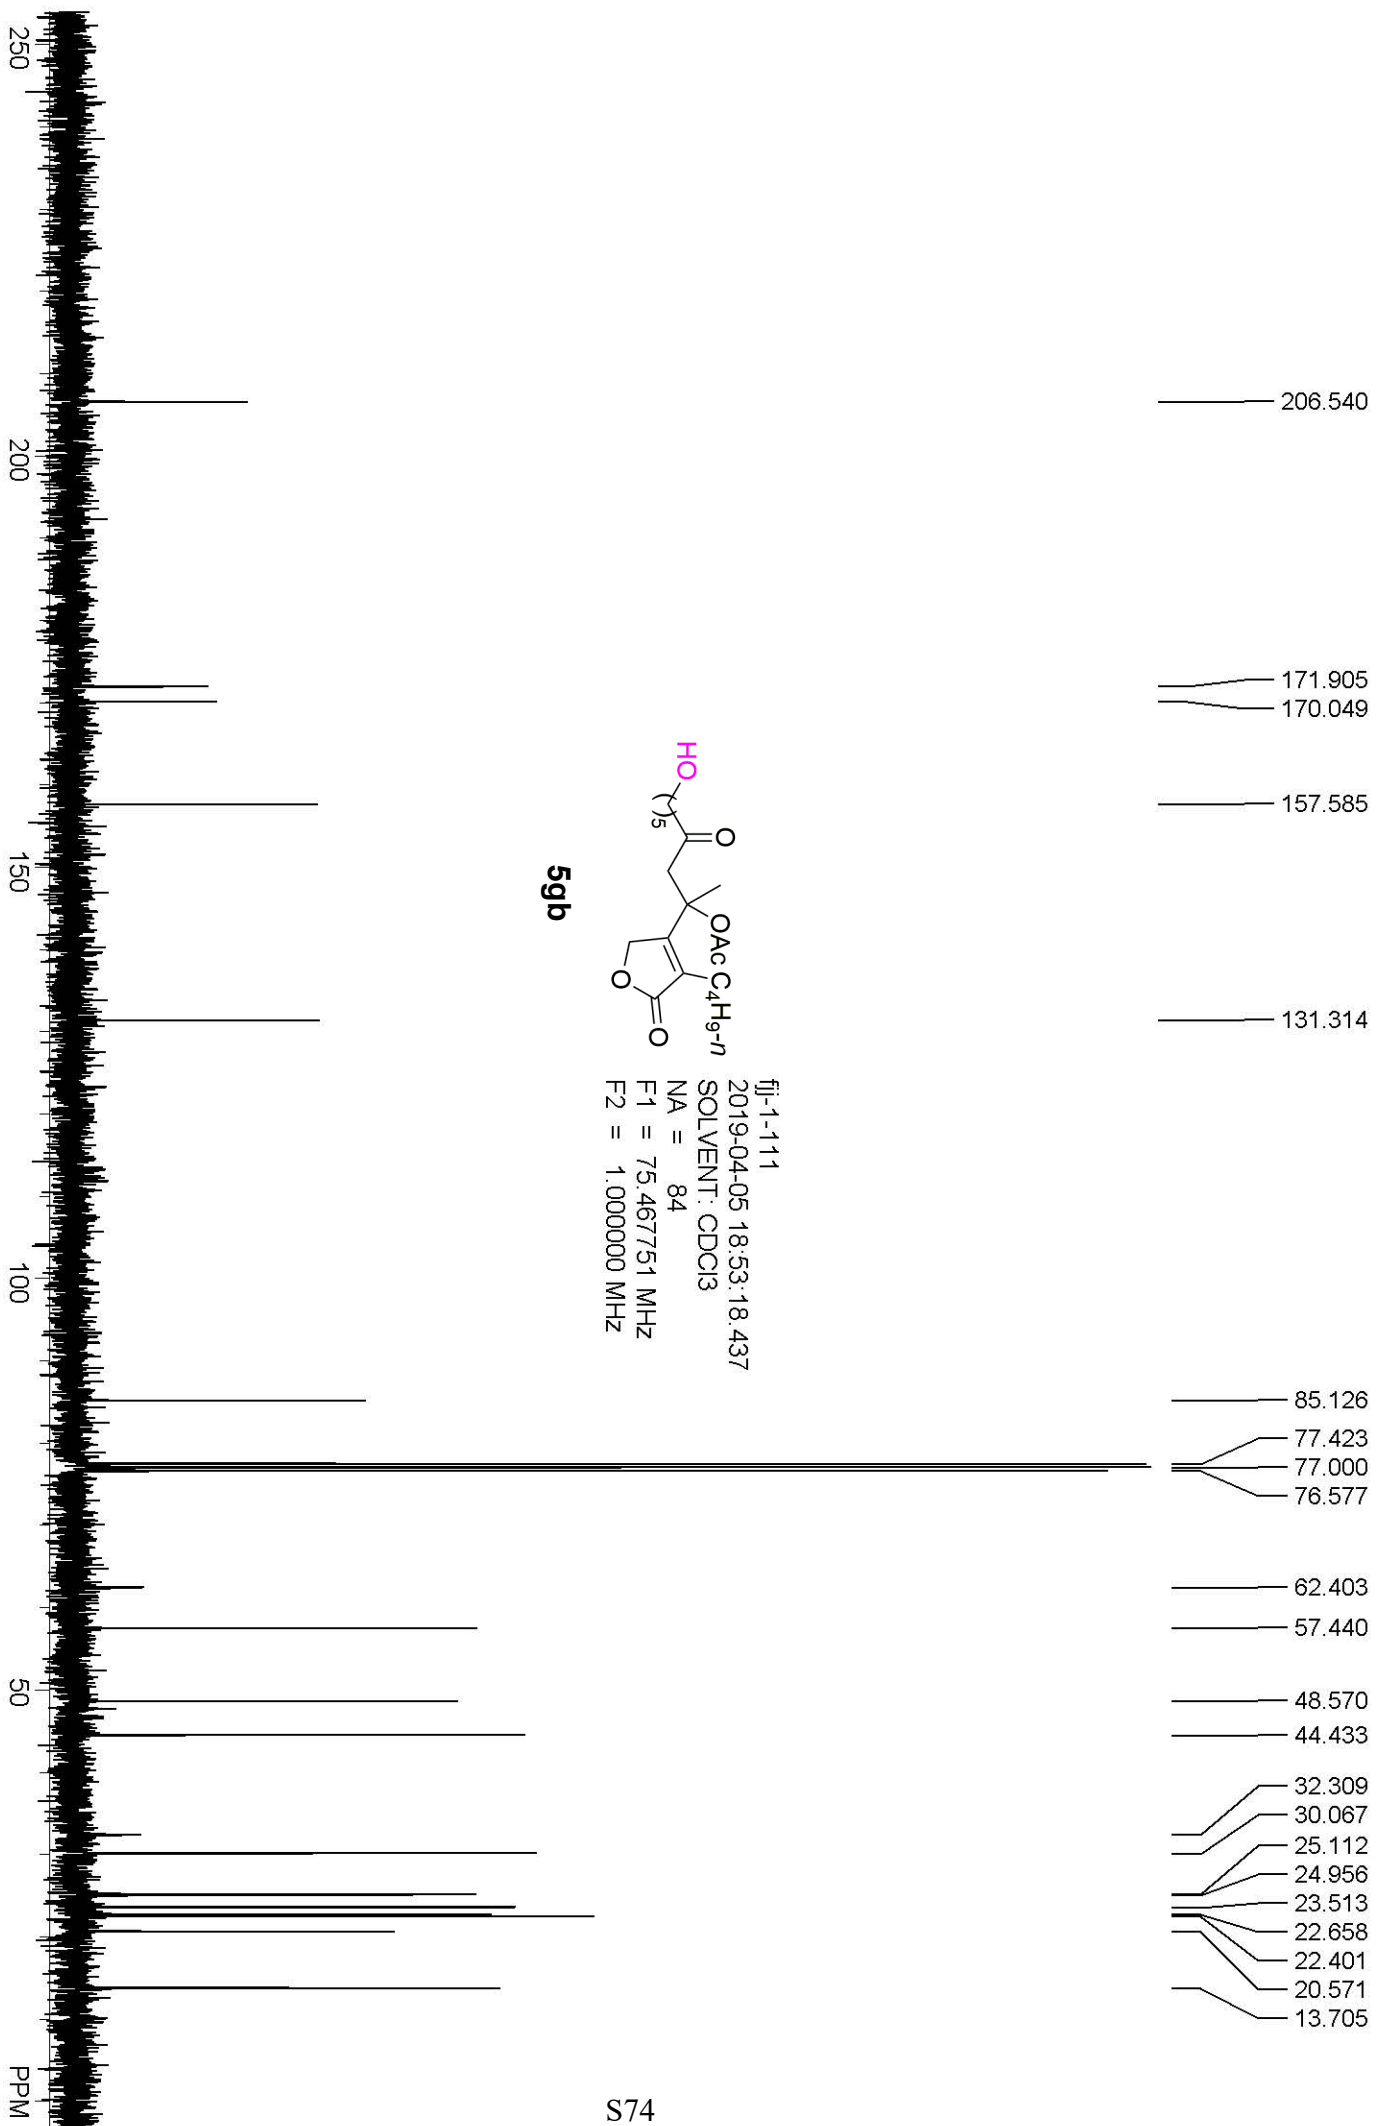

7.904  
7.877  
7.555  
7.534  
7.463  
7.440  
7.416  
7.413  
7.329

5.052  
5.005  
4.982  
4.934

3.748  
3.696  
3.315  
3.263

2.333  
2.308  
2.282  
1.972  
1.968  
1.634  
1.568  
1.544  
1.519  
1.494  
0.946  
0.921  
0.897

0.000

fil-1-064  
2019-02-26 10:54:48.062  
SOLVENT: CDCl3  
NA = 8  
F1 = 300.130005 MHz  
F2 = 1.000000 MHz

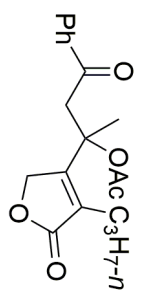

5ha

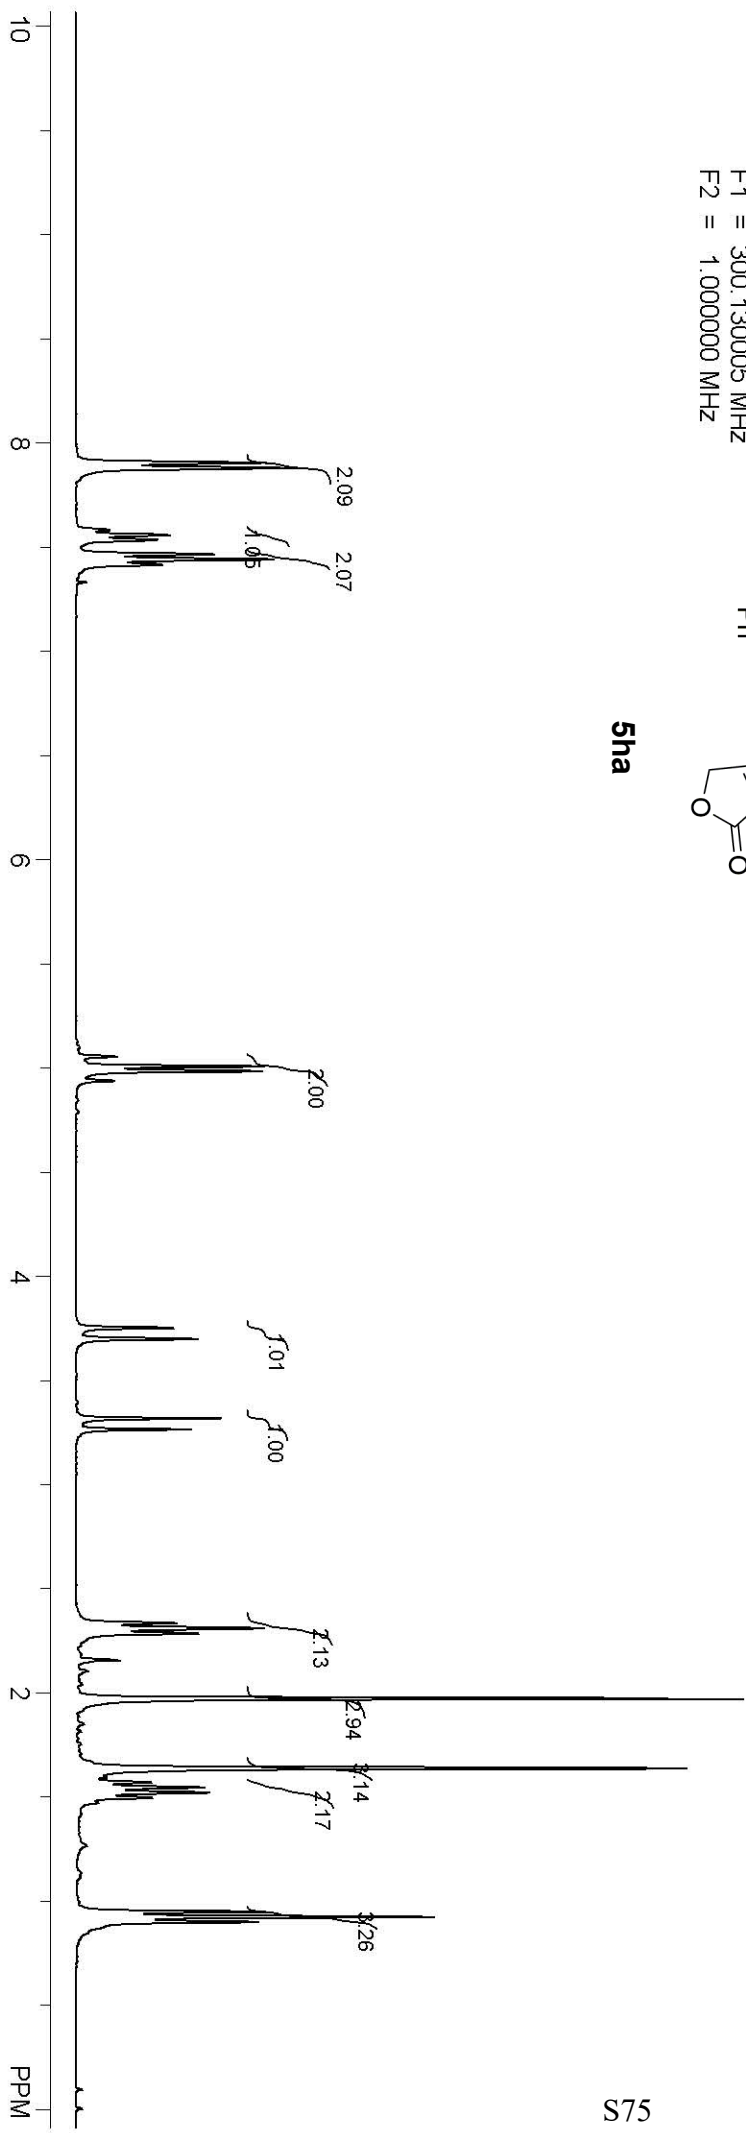

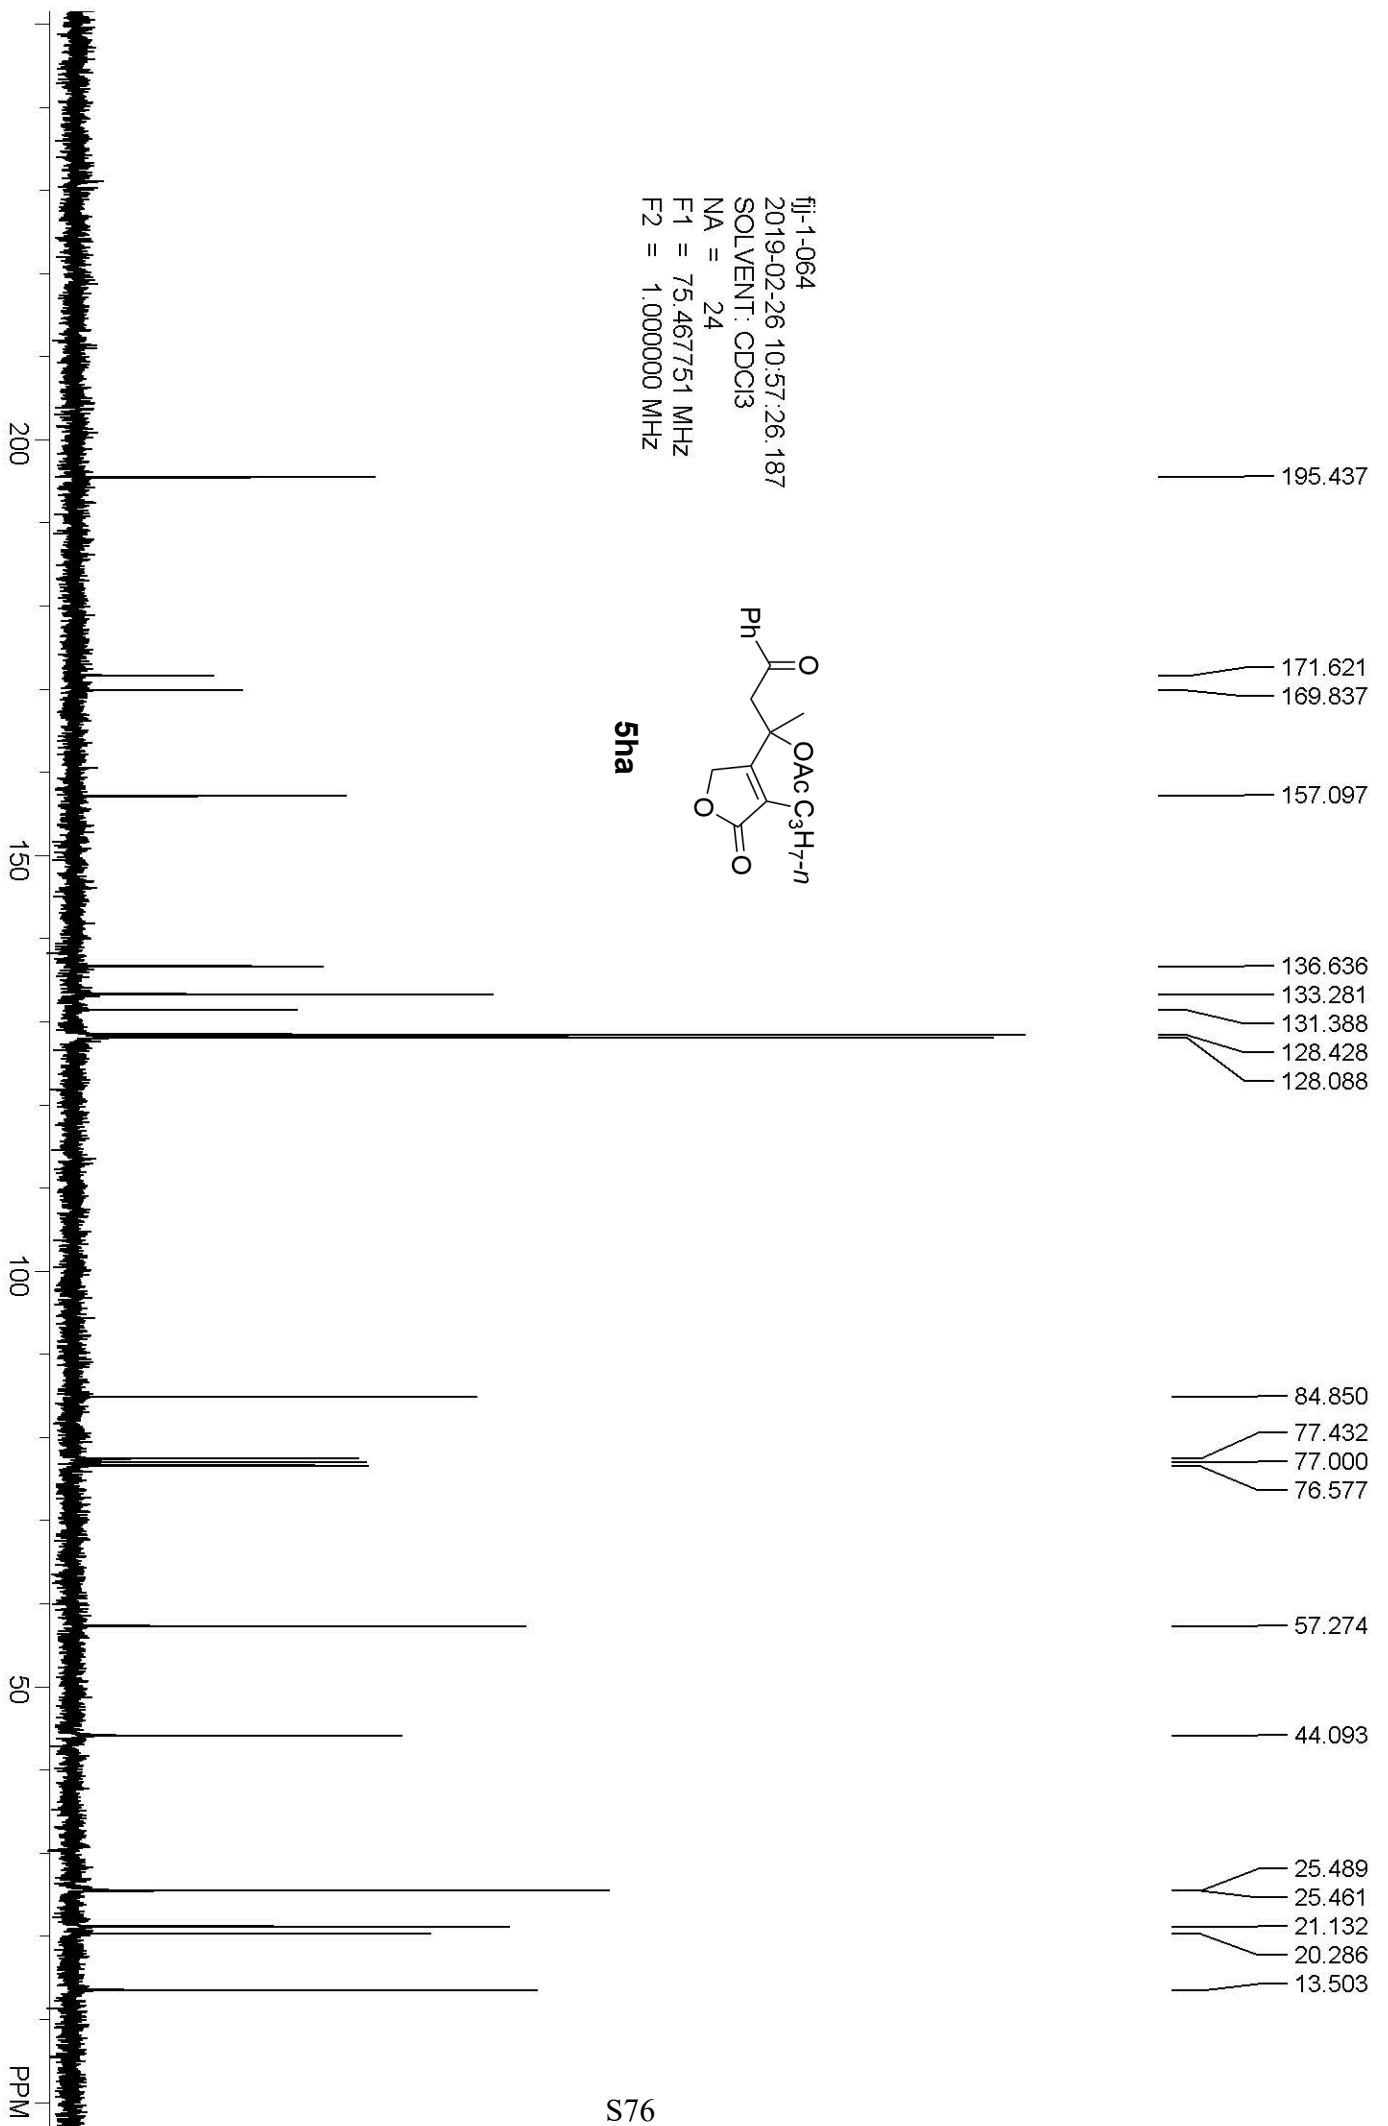

flj-2-022  
 2019-06-26 15:26:46.921  
 Pulse length = 14.000 usec  
 Relaxation delay = 1.000 sec  
 NA = 8  
 F1 = 300.130005 MHz  
 F2 = 1.000000 MHz

- 7.804
- 7.776
- 7.253
- 7.226
- 5.053
- 5.006
- 4.997
- 4.950
- 3.724
- 3.673
- 3.234
- 3.183
- 2.395
- 2.322
- 2.297
- 2.272
- 2.002
- 1.634
- 1.578
- 1.554
- 1.528
- 1.503
- 1.479
- 1.454
- 0.939
- 0.915
- 0.890
- 0.000

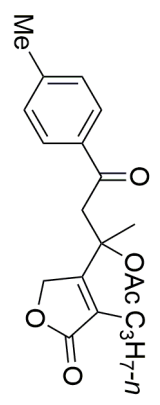

**5ia**

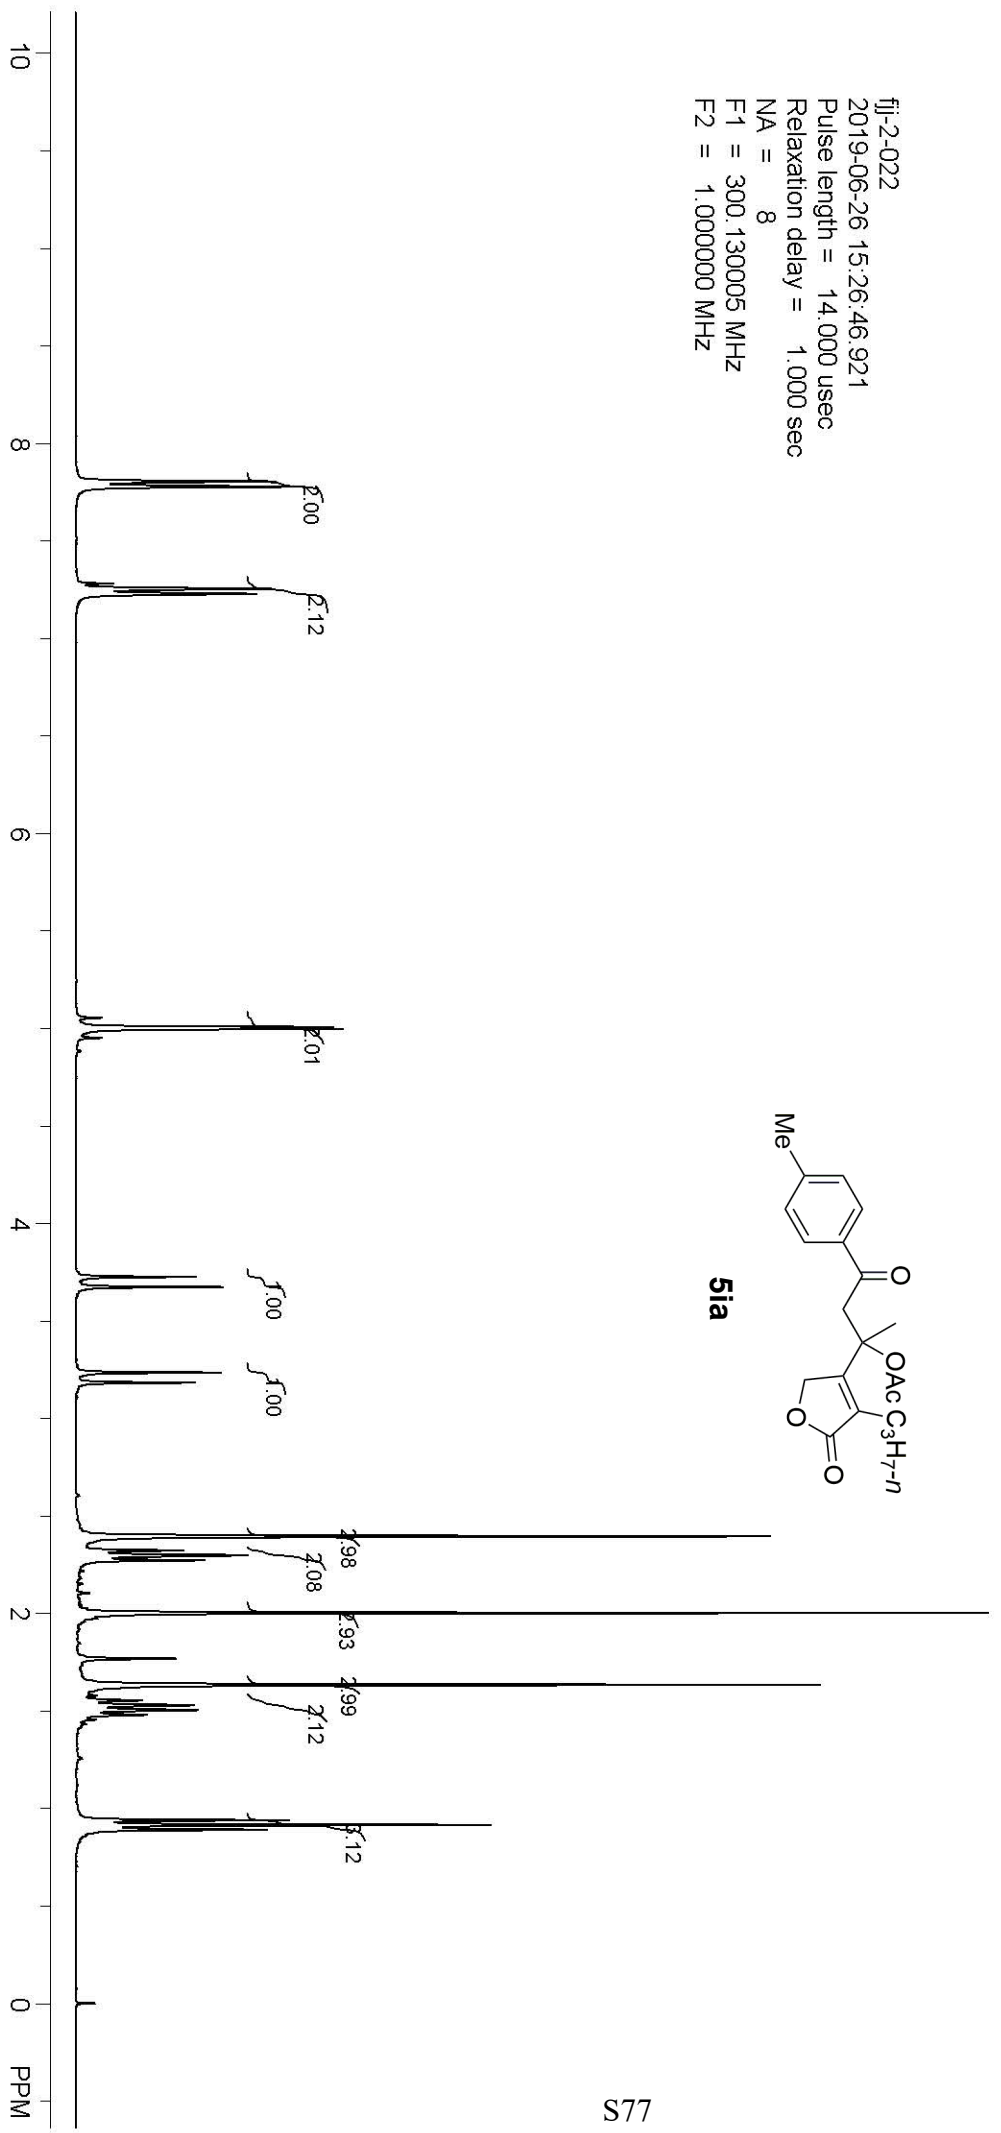

fil-2-022  
2019-06-25 22:10:25.640  
SOLVENT: CDCl3  
NA = 70  
F1 = 75.467751 MHz  
F2 = 1.000000 MHz

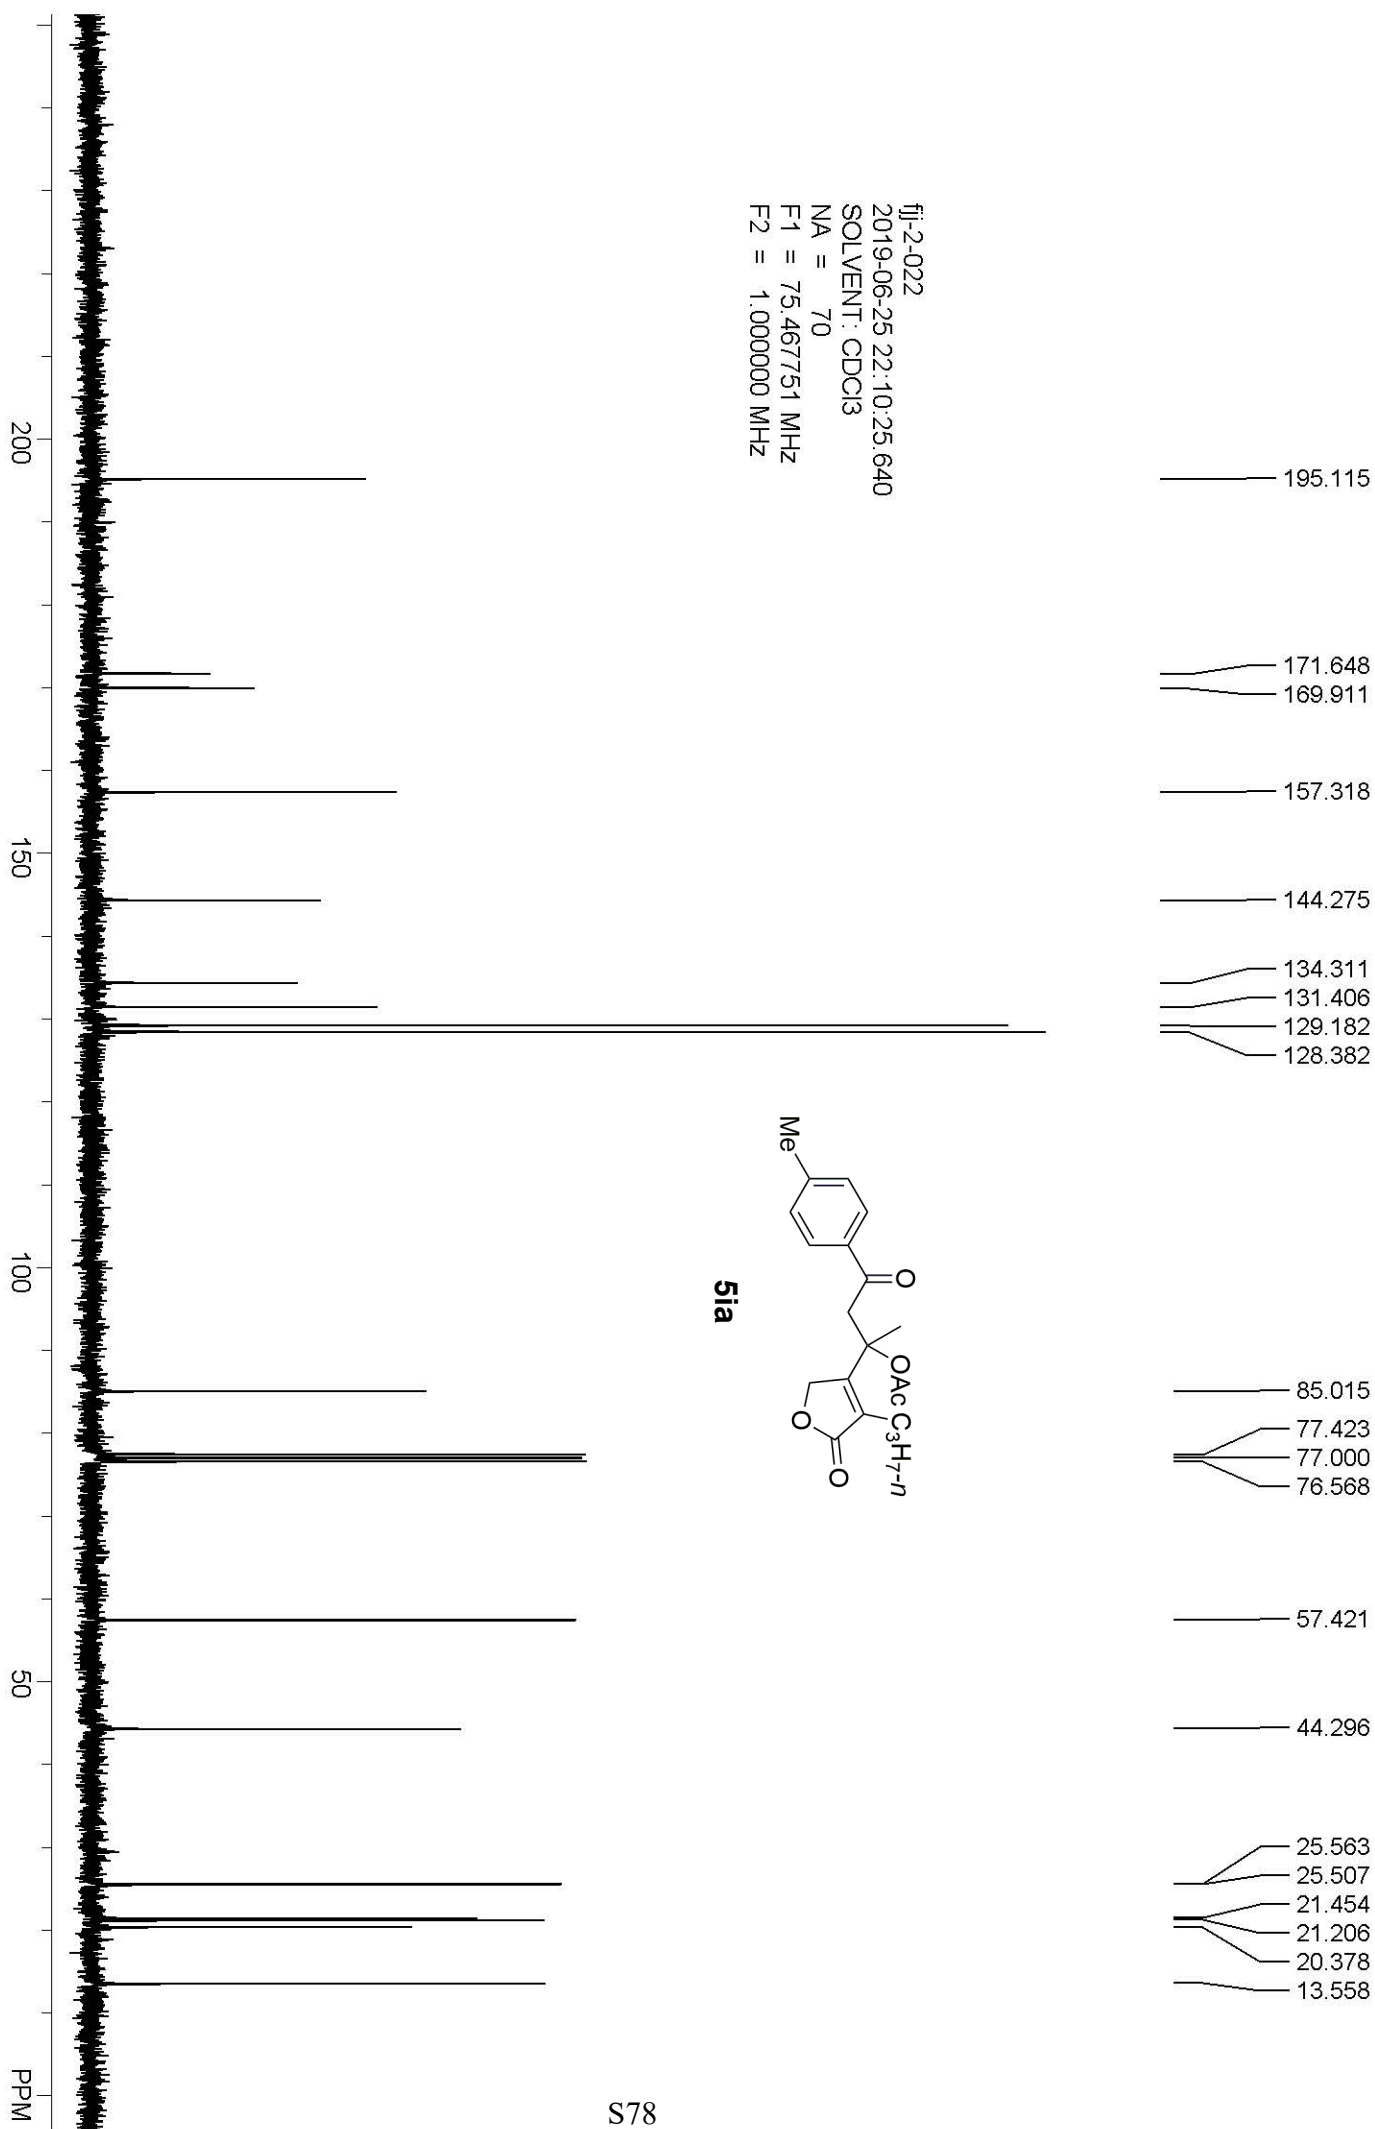

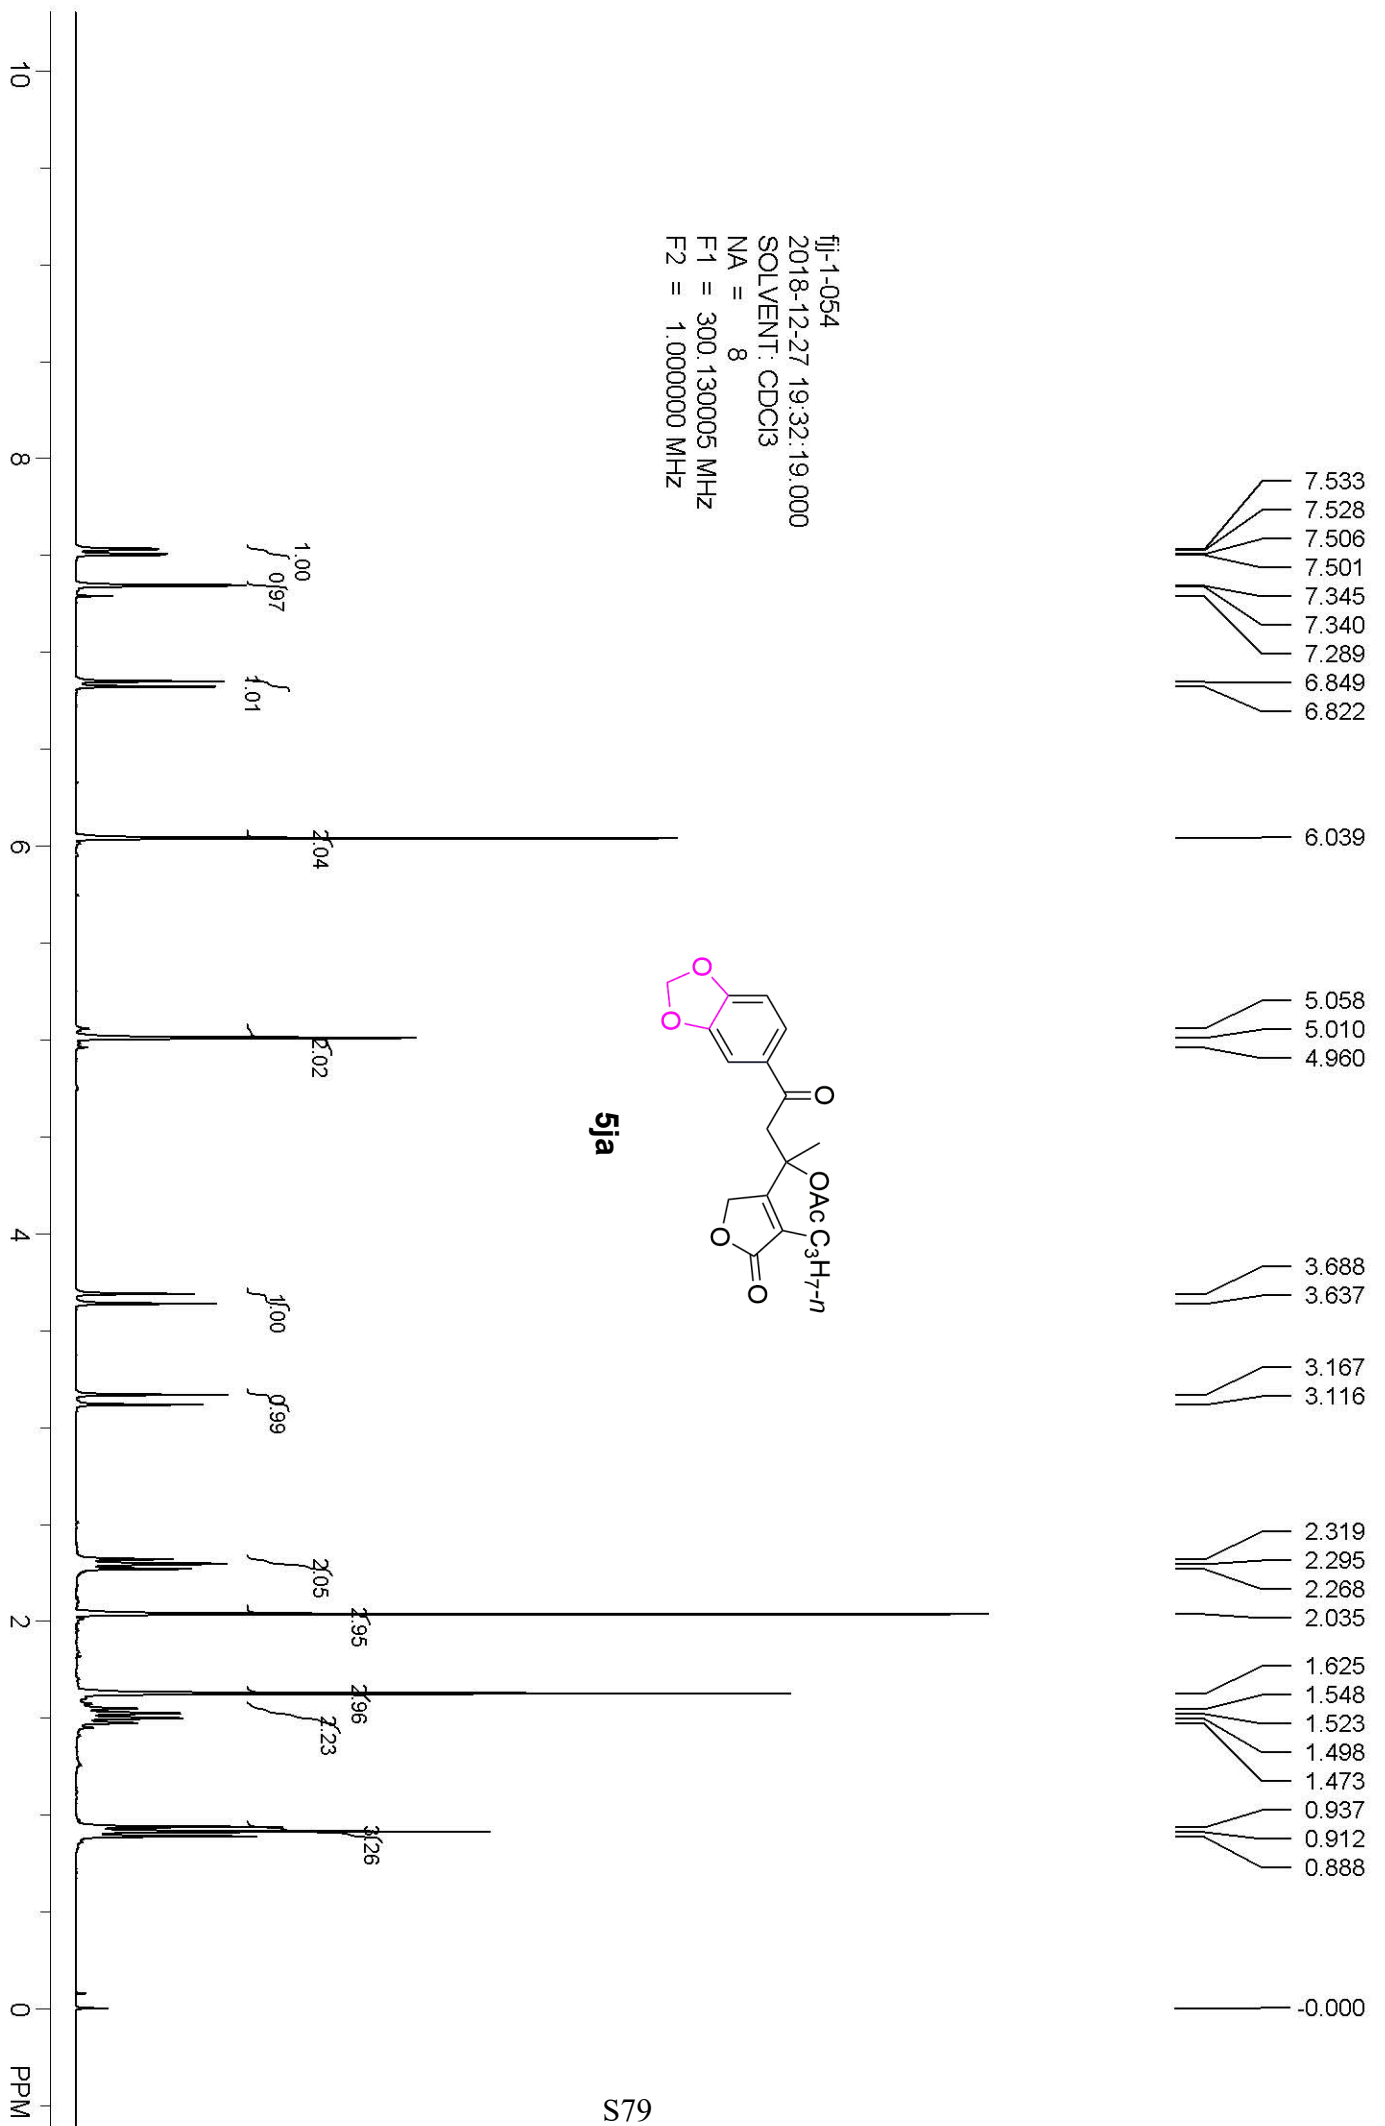

fj-1-054  
2018-12-27 19:42:29.453  
SOLVENT: CDCl3  
NA = 150  
F1 = 75.467751 MHz  
F2 = 1.000000 MHz

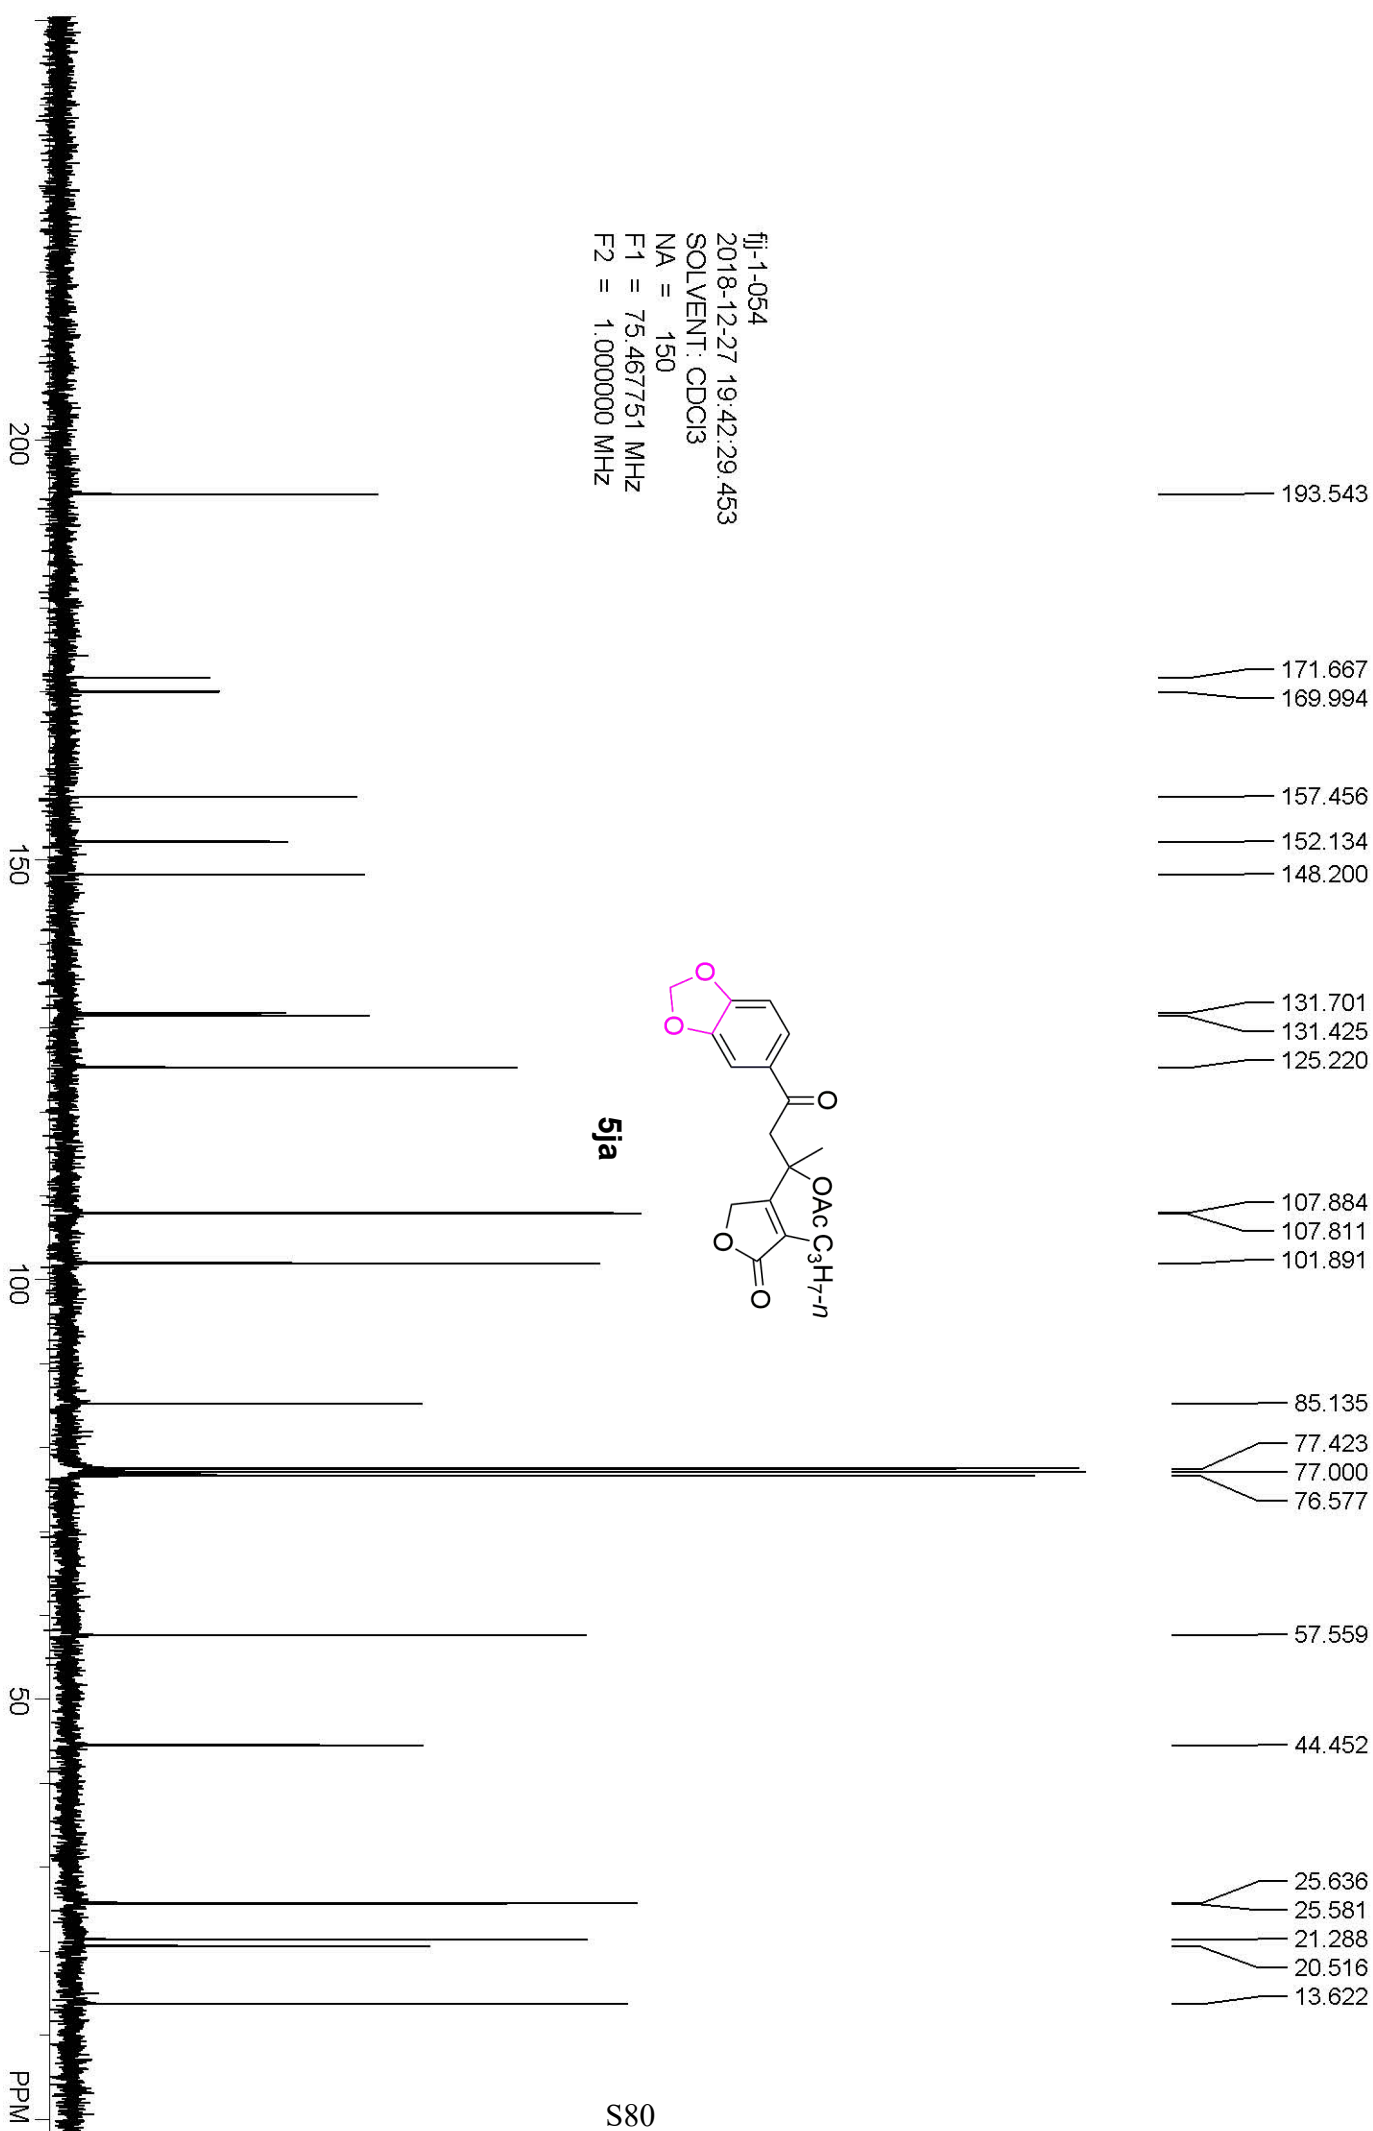



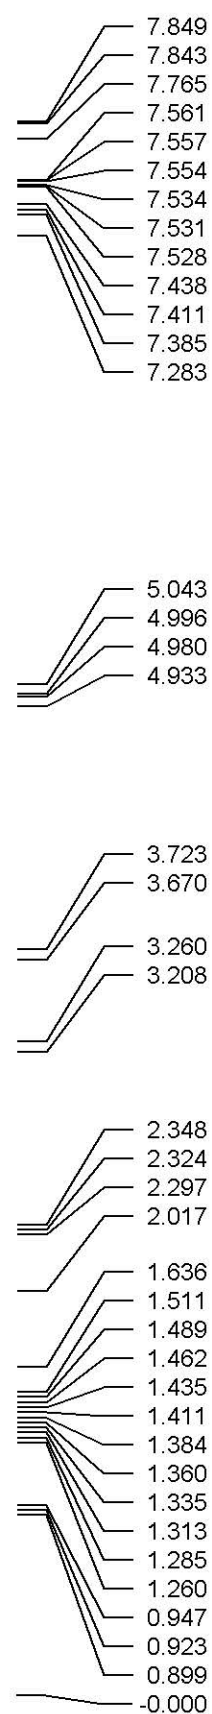

fil-1-095  
2019-03-21 17:53:46.500  
SOLVENT: CDCl3  
NA = 8  
F1 = 300.130005 MHz  
F2 = 1.000000 MHz

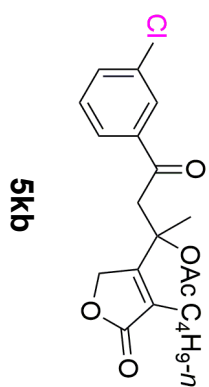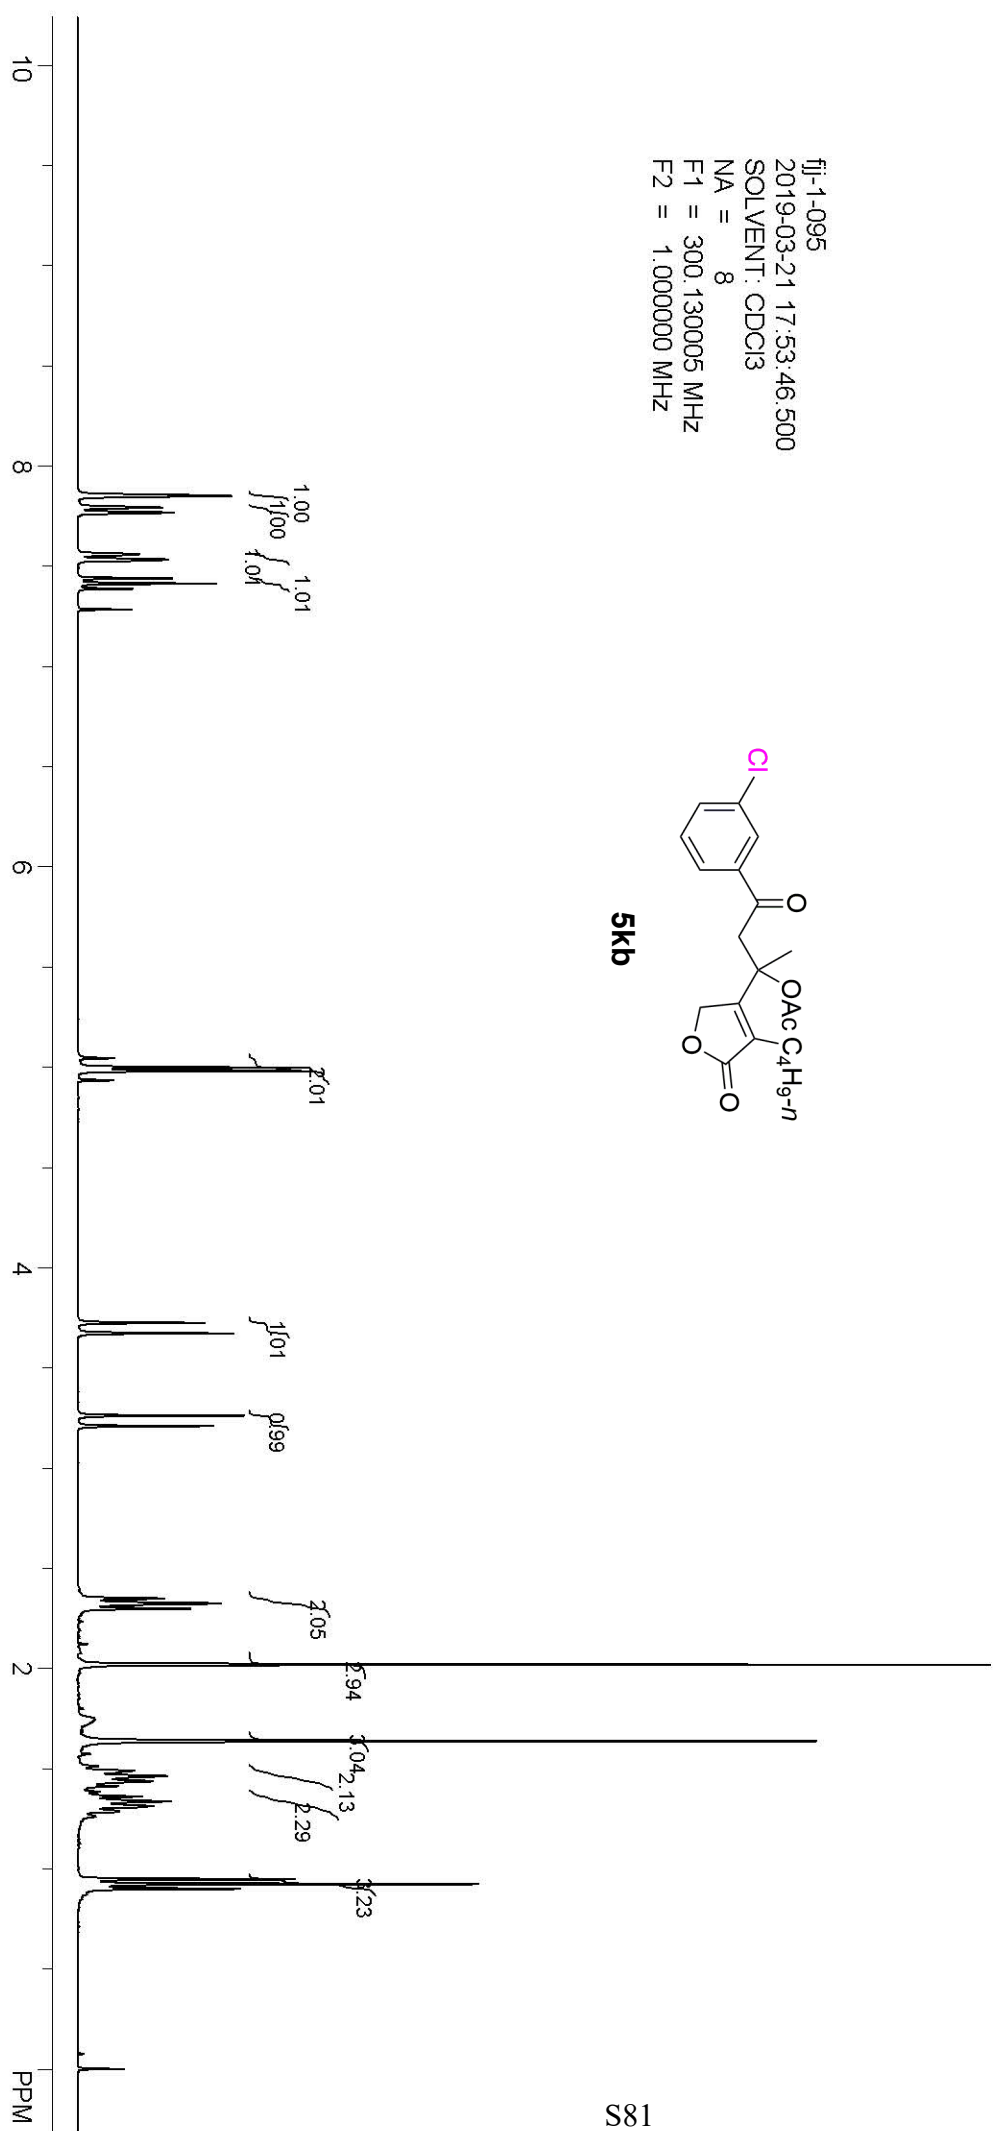

fjl-1-095  
2019-03-21 18:28:48.765  
SOLVENT: CDCl3  
NA = 508  
F1 = 75.467751 MHz  
F2 = 1.000000 MHz

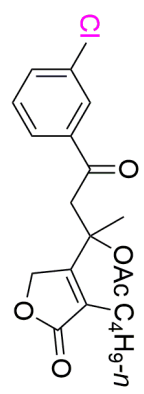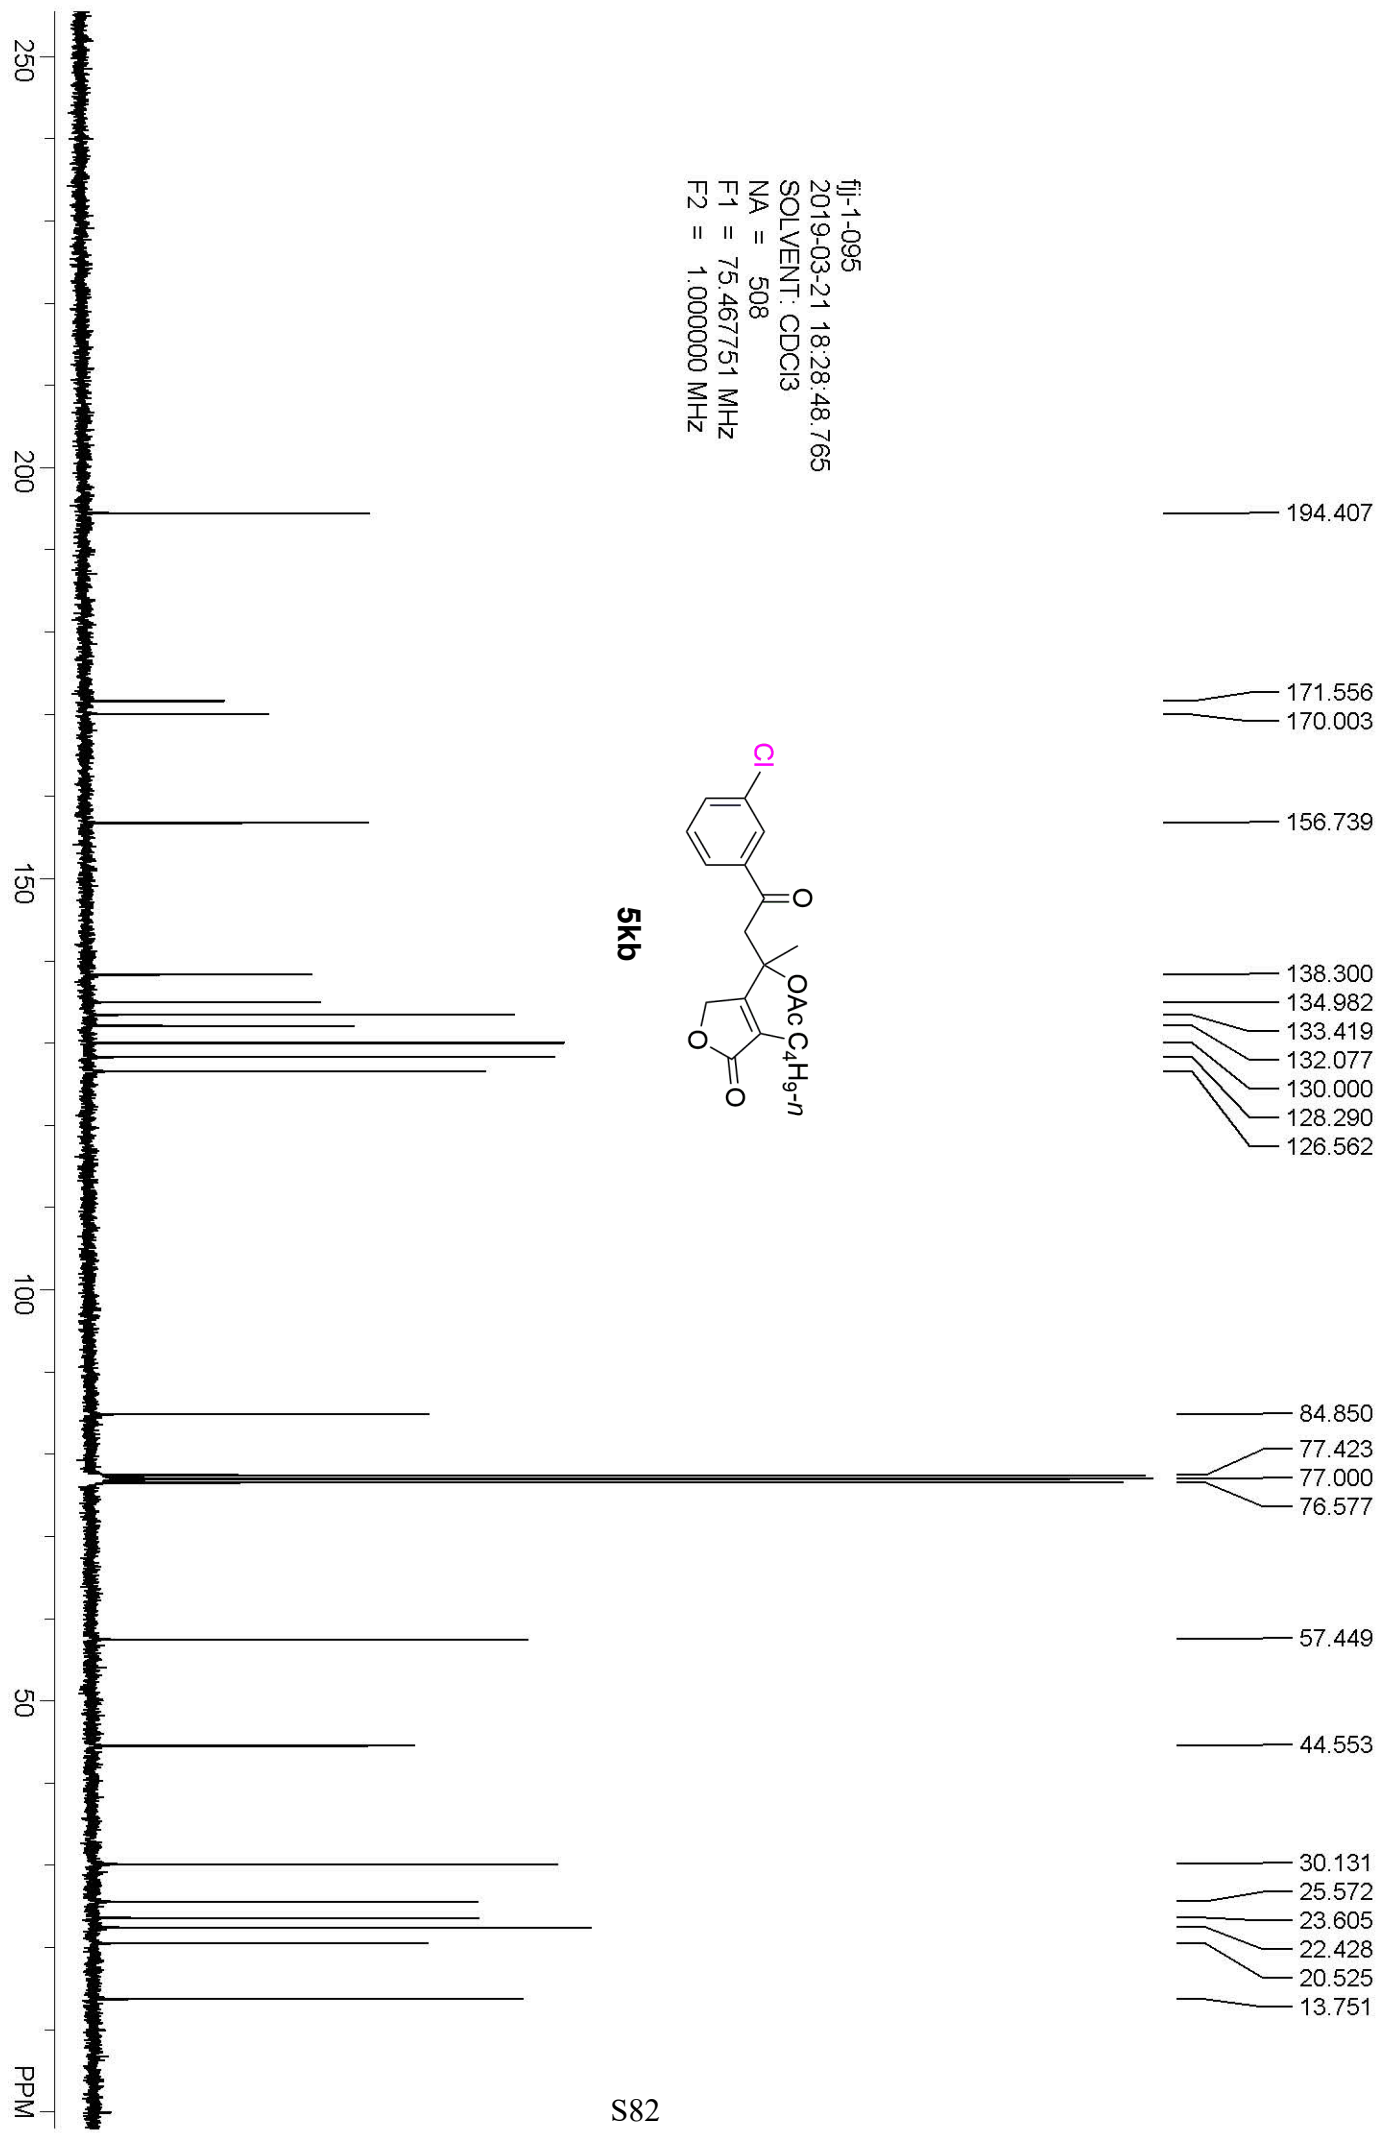

7.744  
7.731  
7.675  
7.659  
7.315  
7.146  
7.132  
7.116

5.058  
5.010  
5.003  
4.955

3.656  
3.606  
3.212  
3.162

2.330  
2.306  
2.280  
2.041  
1.491  
1.469  
1.453  
1.439  
1.416  
1.389  
1.362  
1.338  
1.313  
1.290  
1.266  
1.242  
0.929  
0.904  
0.881  
-0.000

fl-1-090  
2019-03-20 14:25:16.140  
SOLVENT: CDCl3  
NA = 8  
F1 = 300.130005 MHz  
F2 = 1.000000 MHz

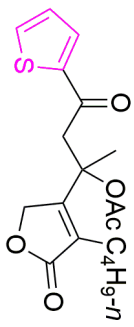

51b

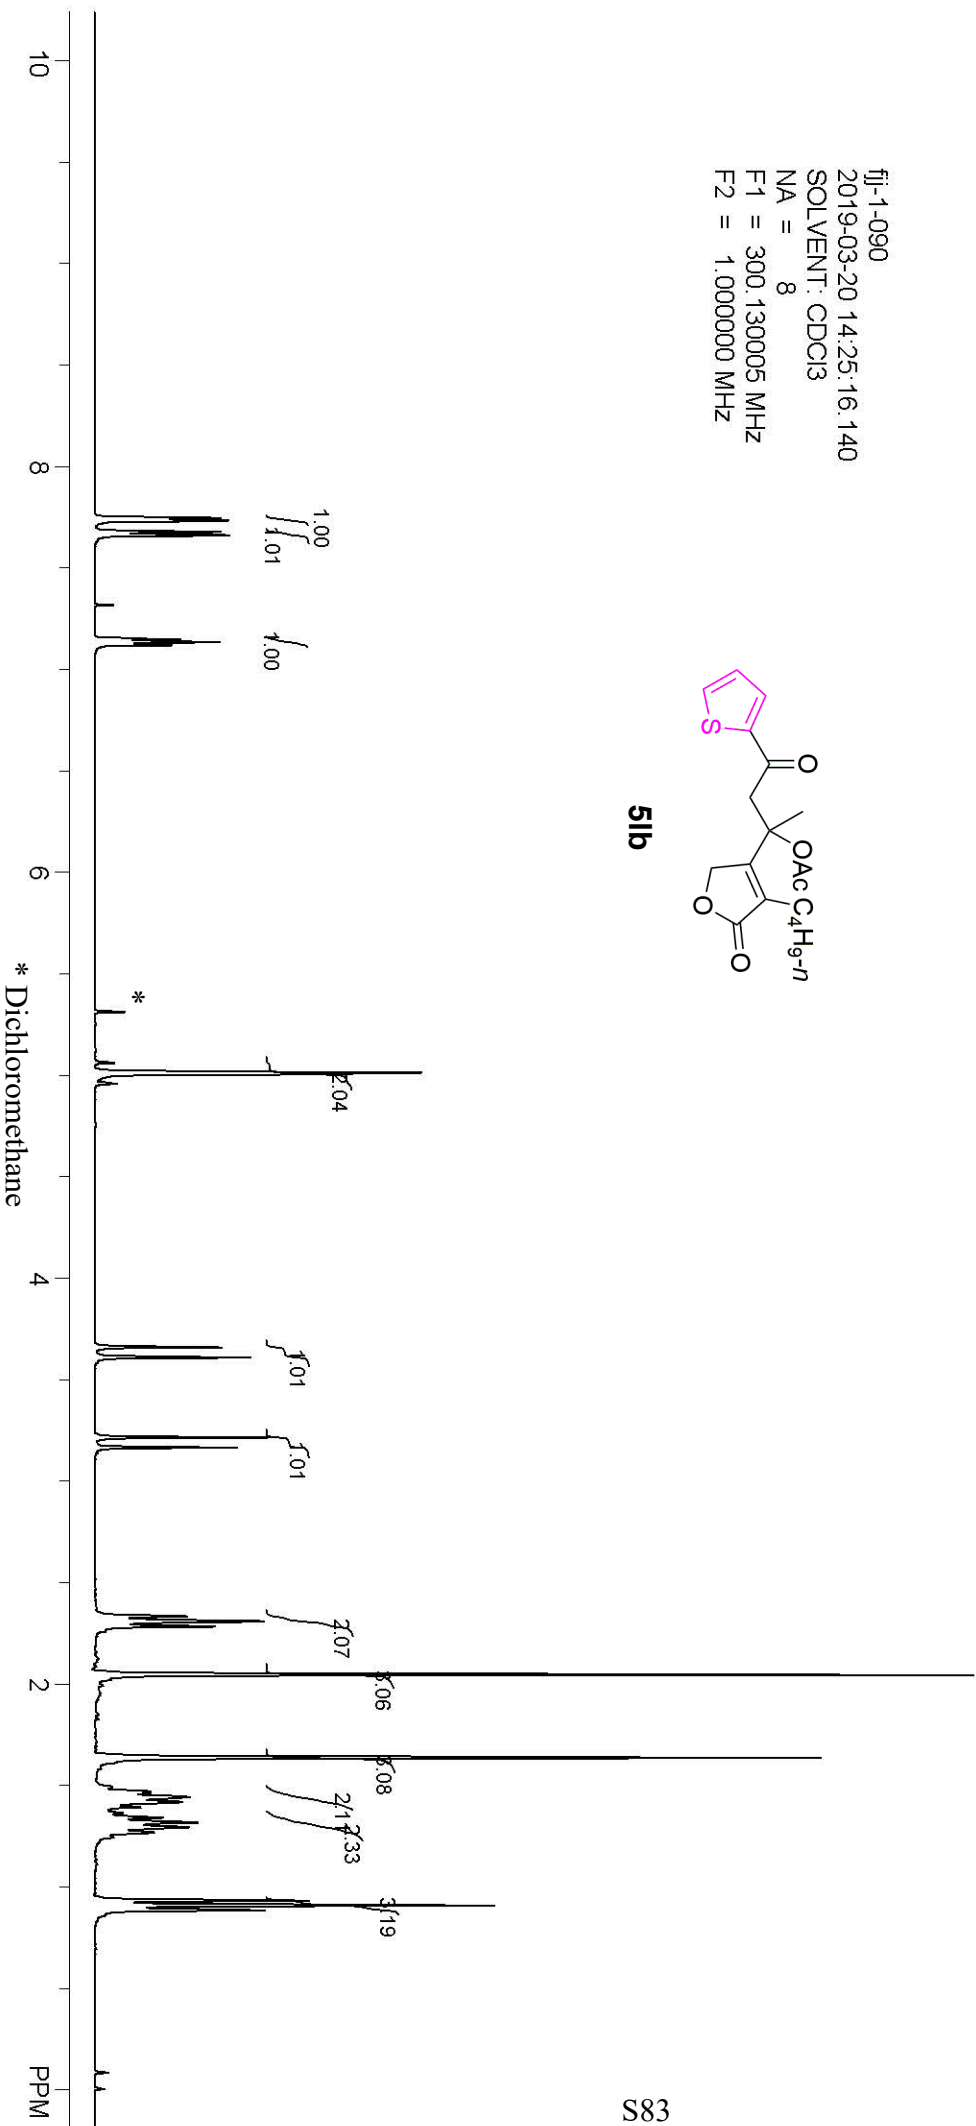

fjl-1-090  
2019-03-20 14:29:36.953  
SOLVENT: CDCl3  
NA = 49  
F1 = 75.467751 MHz  
F2 = 1.000000 MHz

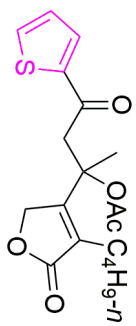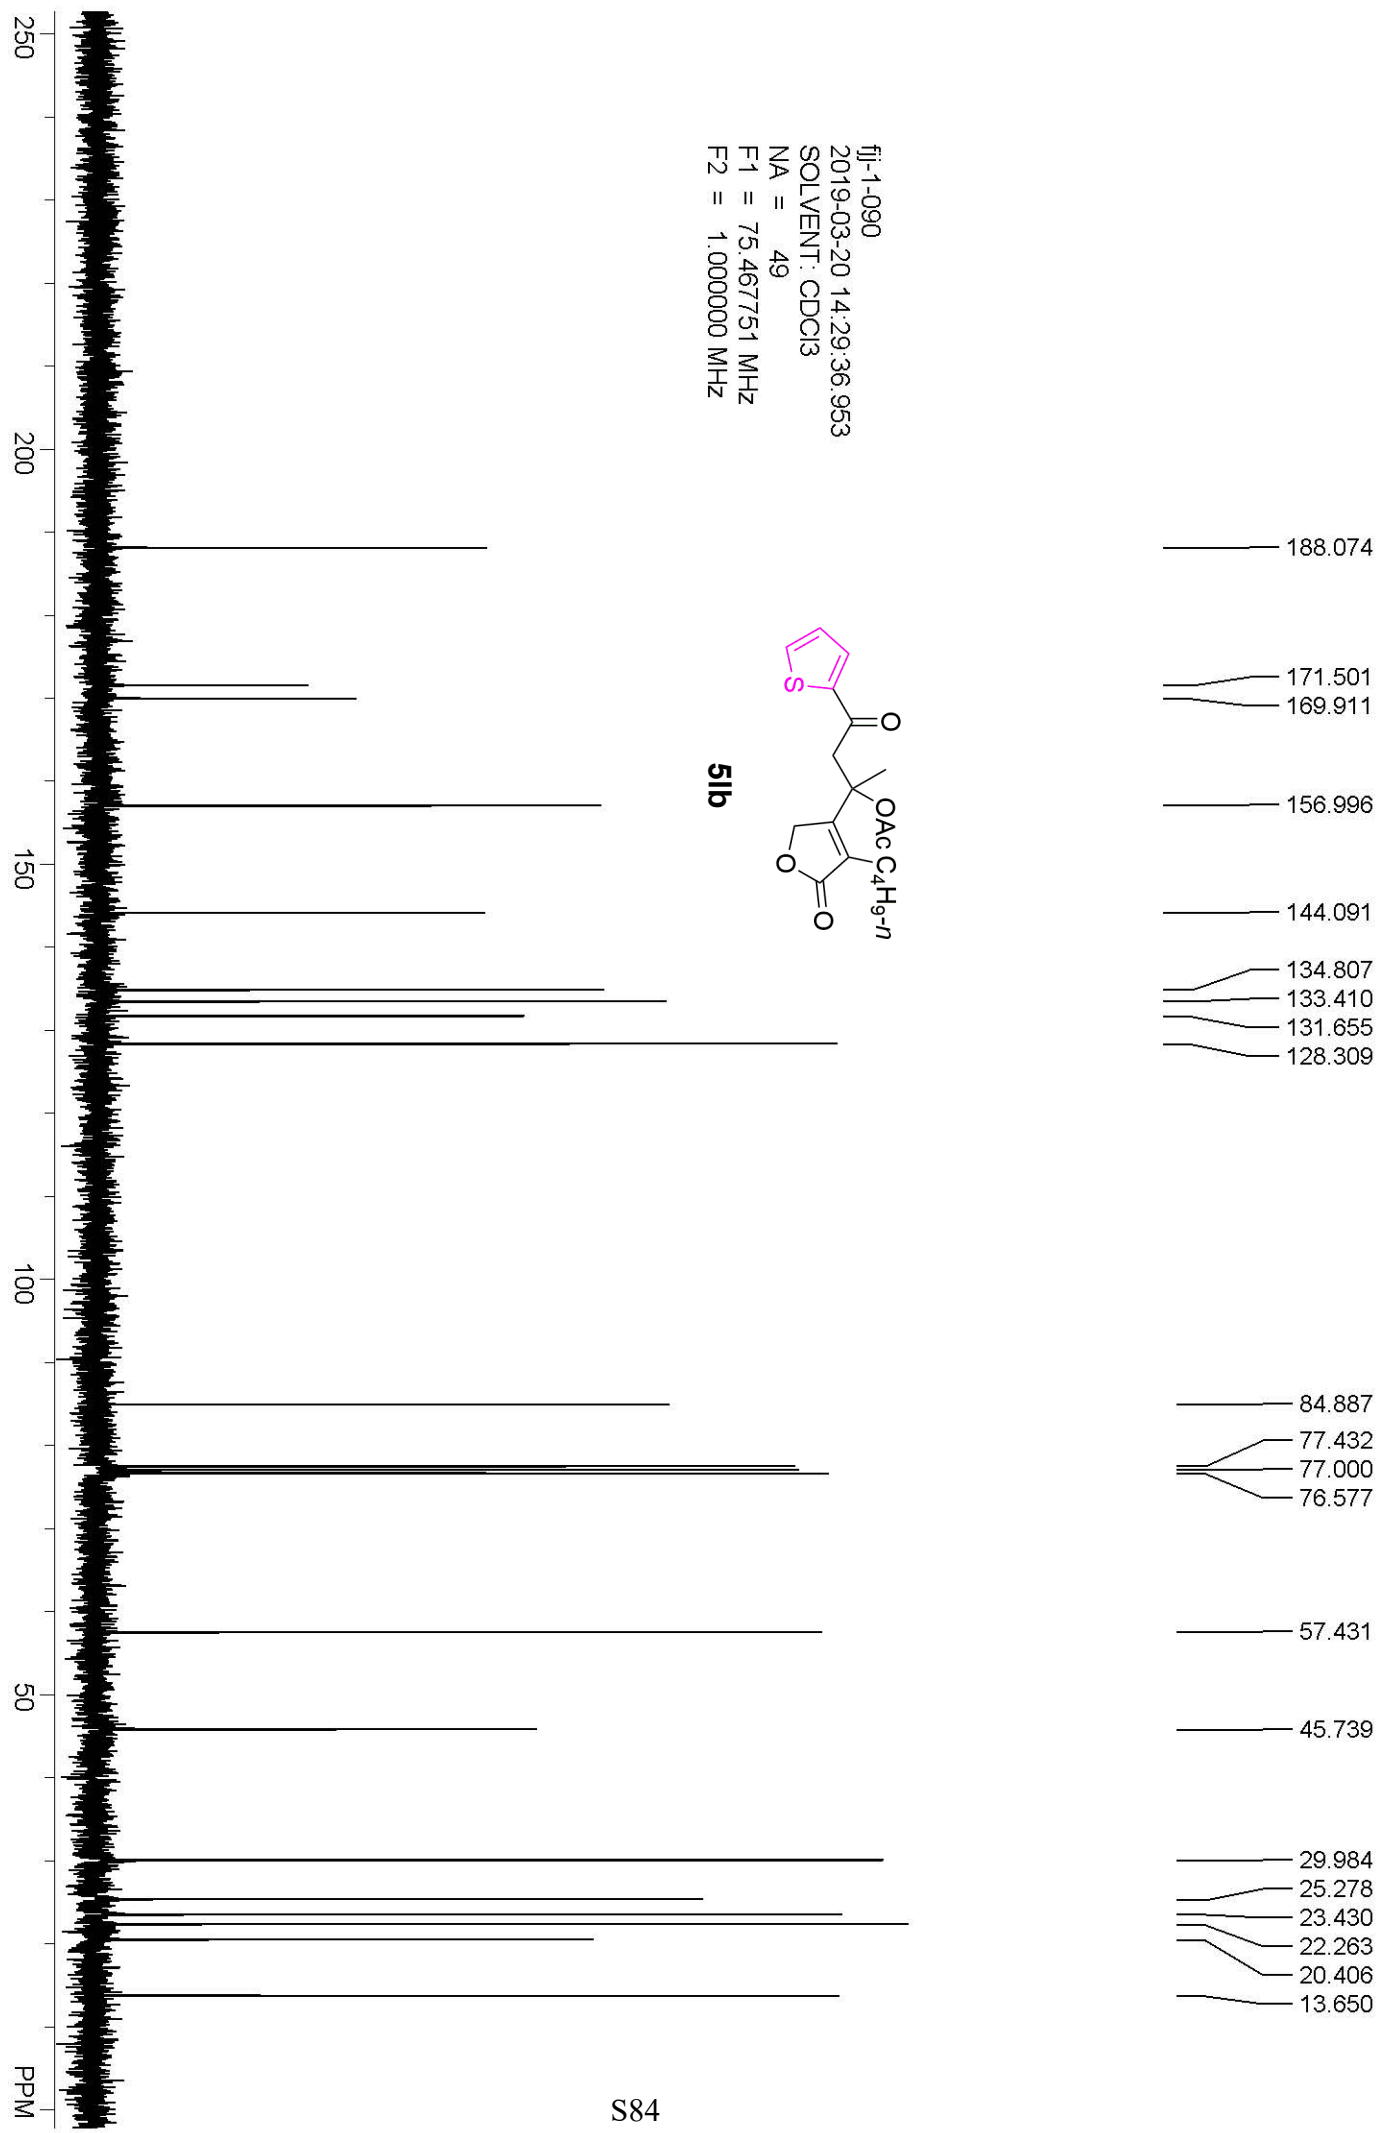

fj-1-135  
 2019-04-23 15:58:59.609  
 SOLVENT: CDCl3  
 NA = 8  
 PTSD = 32768  
 F1 = 300.130005 MHz  
 F2 = 1.000000 MHz

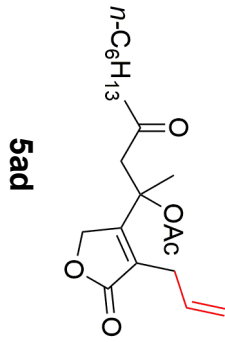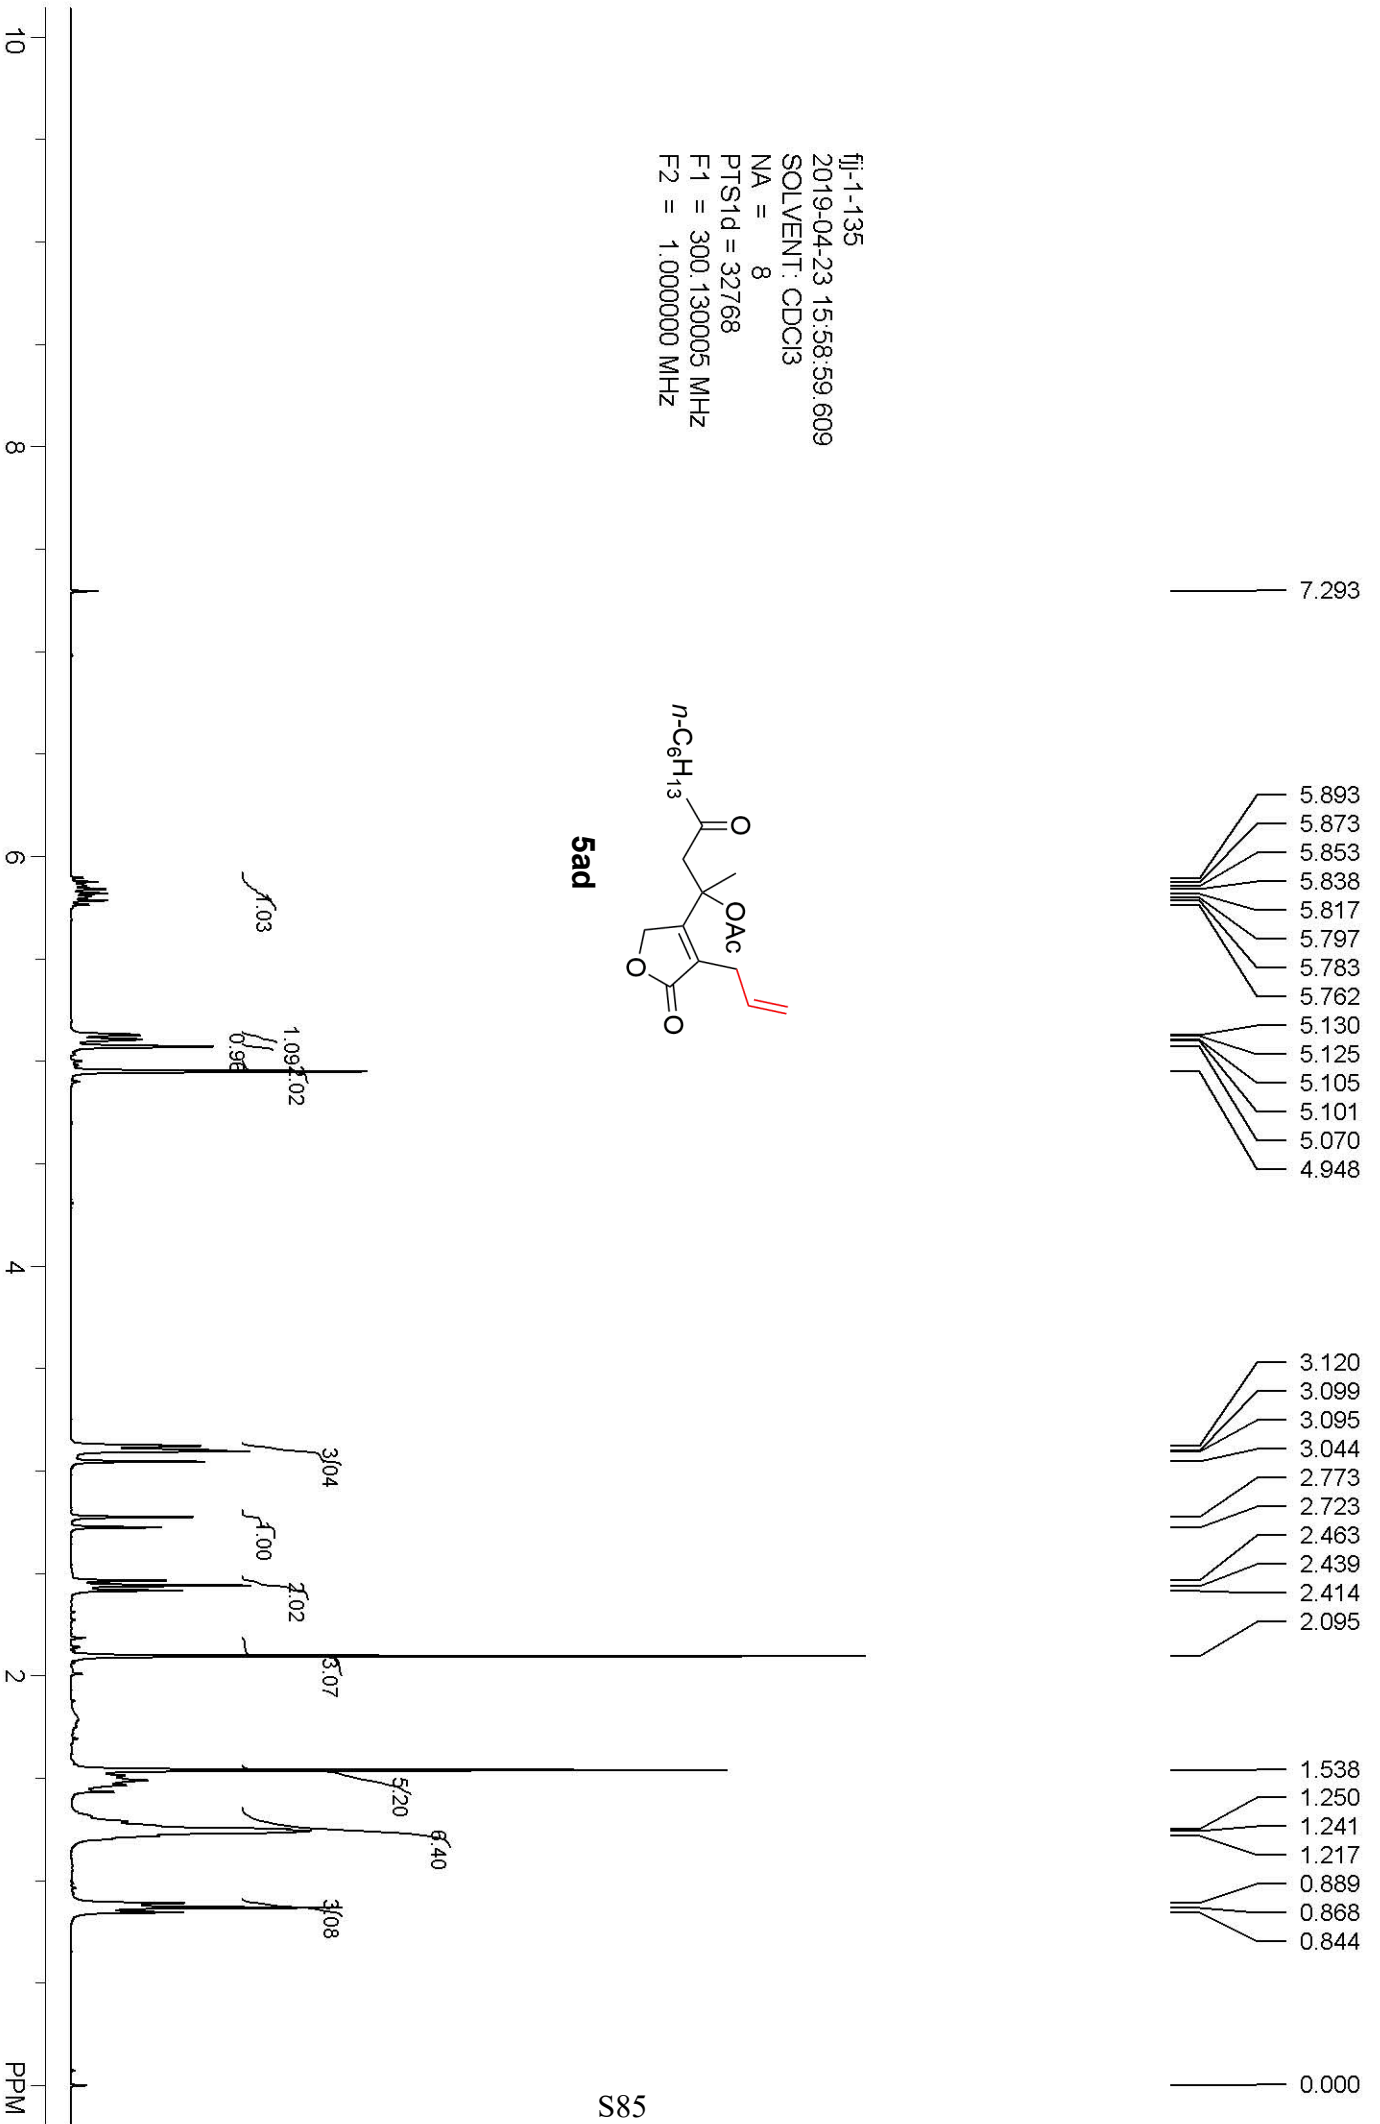

fj-1-135  
2019-04-23 16:12:30.750  
SOLVENT: CDCl3  
NA = 203  
F1 = 75.467751 MHz  
F2 = 1.000000 MHz

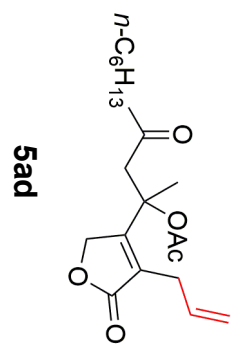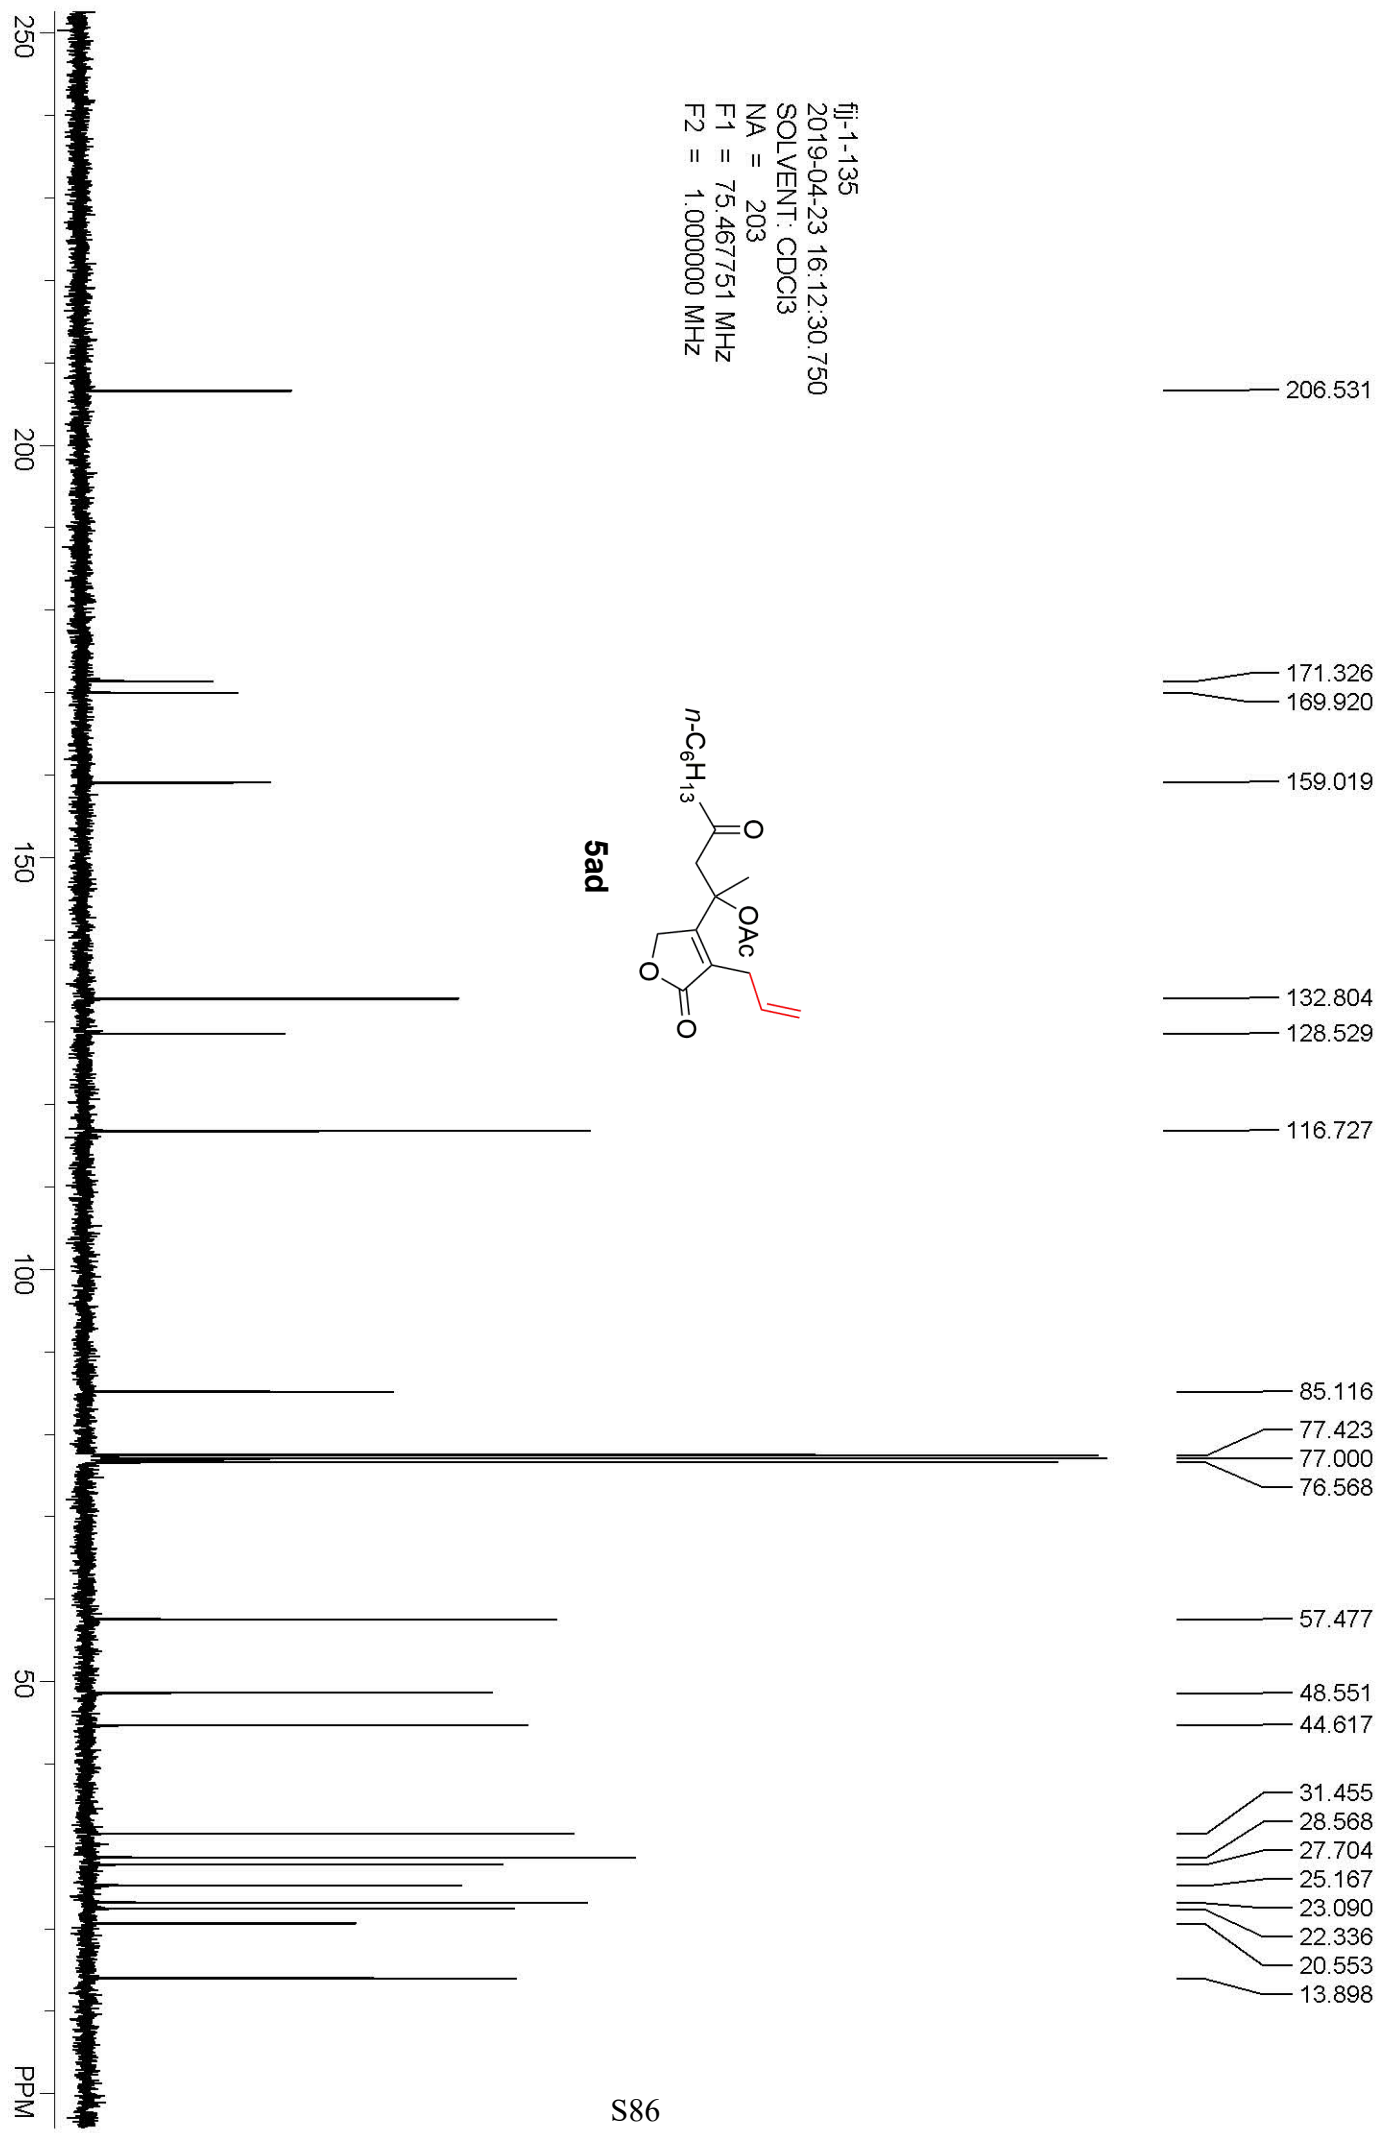



fj-2-018  
2019-06-23 15:25:13.015  
SOLVENT: CDCl3  
NA = 223  
F1 = 75.467751 MHz  
F2 = 1.000000 MHz

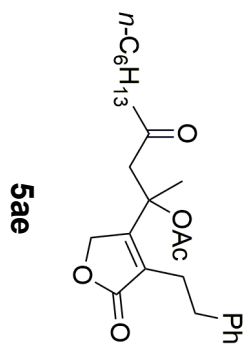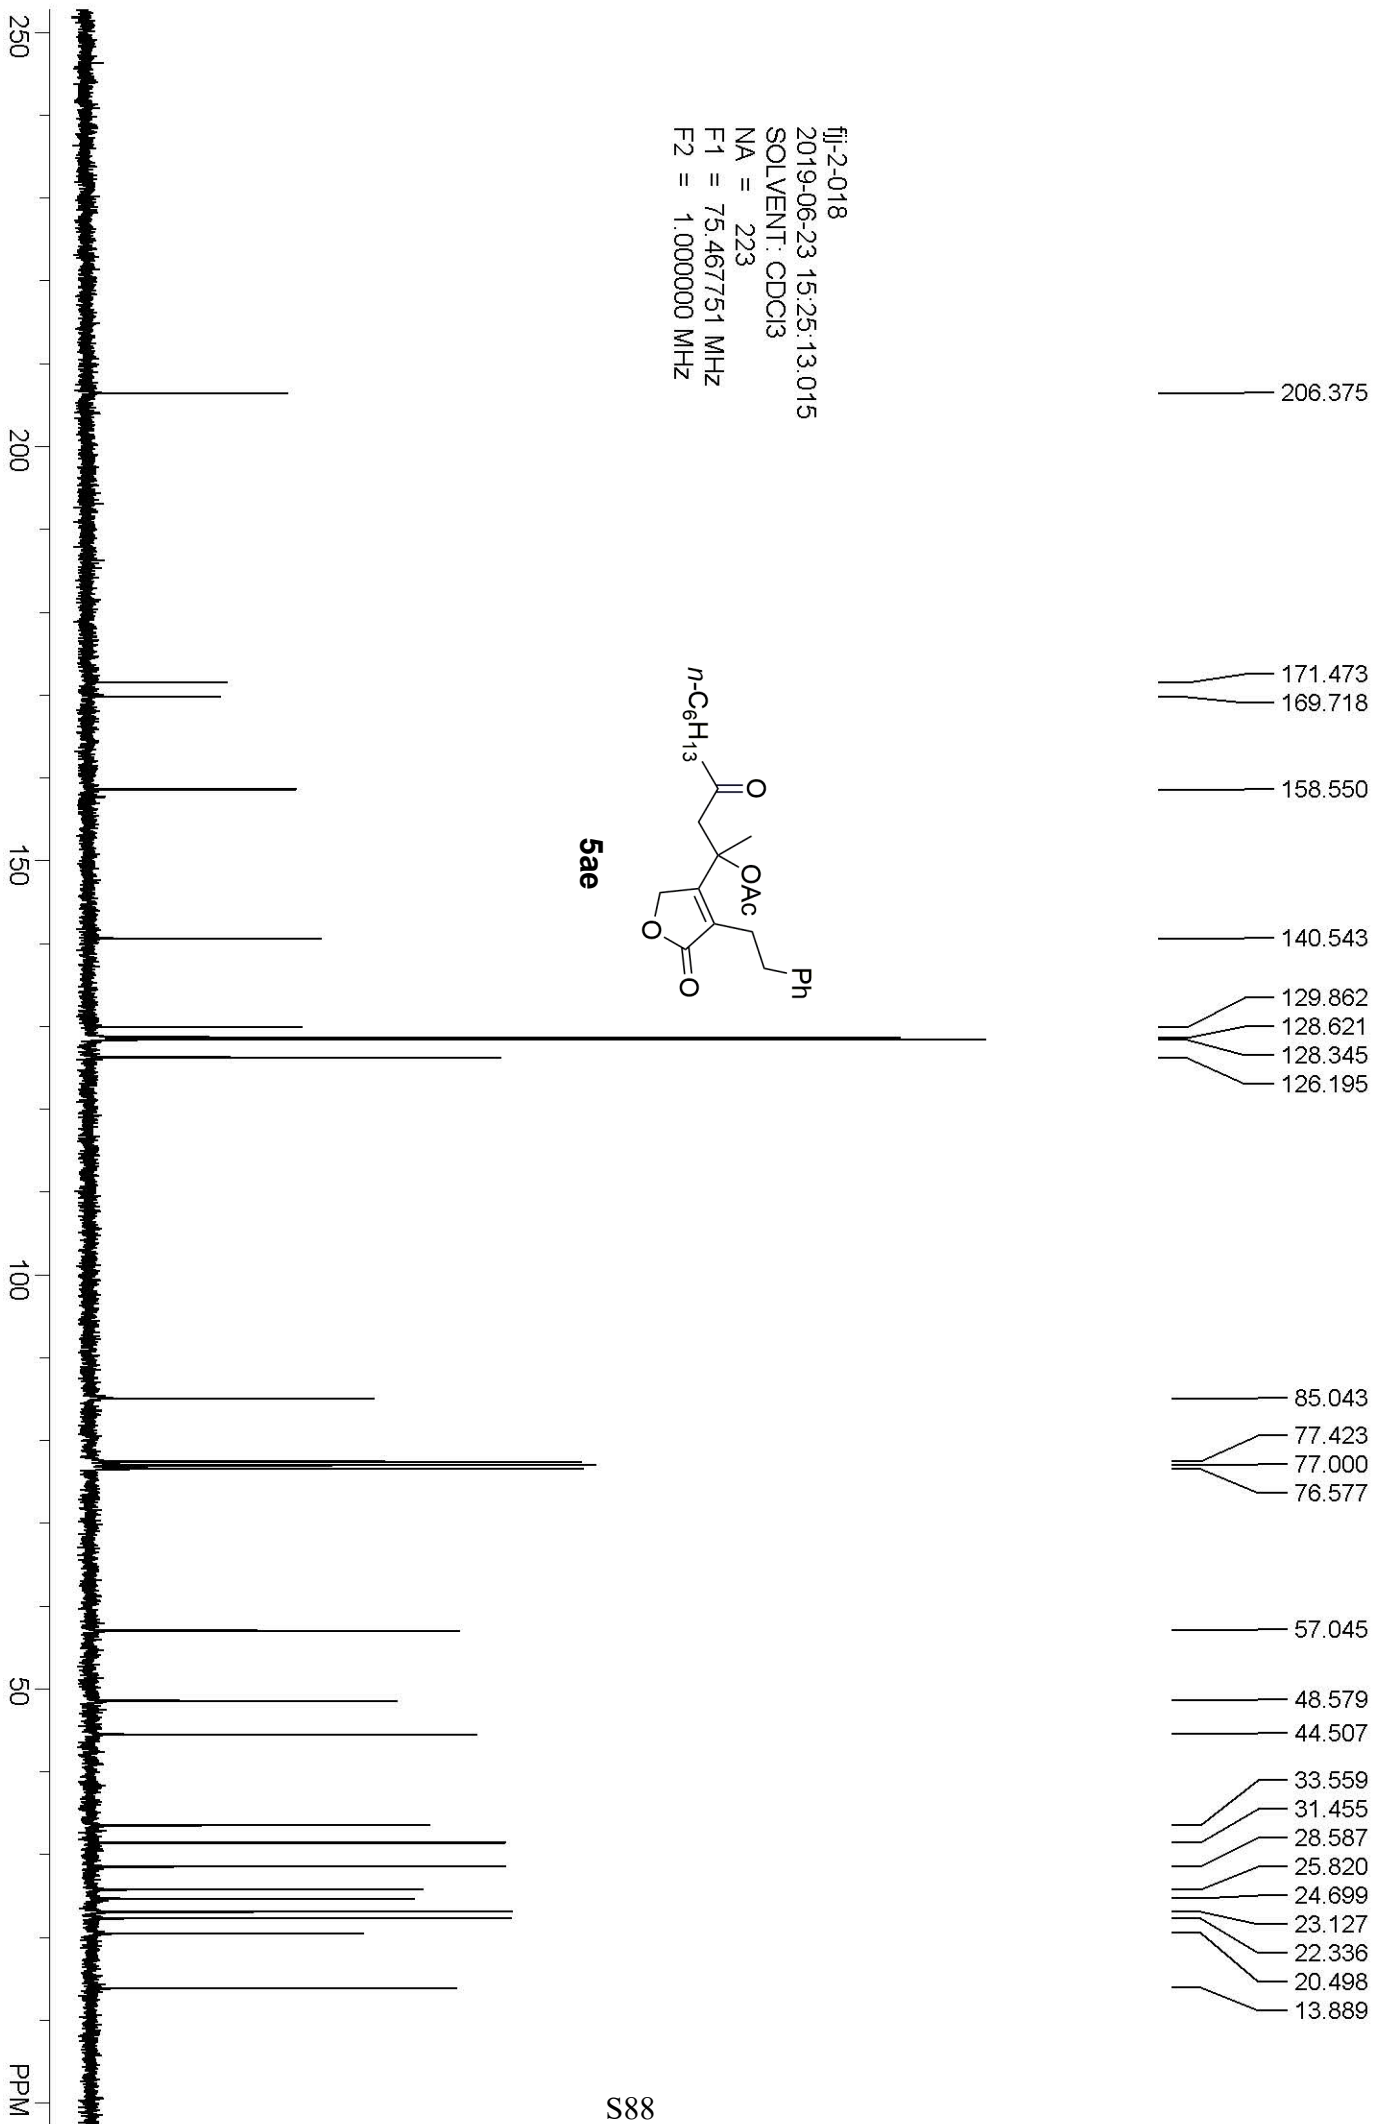



7.271  
7.261  
7.247  
7.214  
7.190  
7.169  
7.165  
7.142  
6.800

4.594  
4.546  
4.490  
4.443

2.949  
2.900  
2.838  
2.681  
2.655  
2.631  
2.422  
2.414  
2.397  
2.390  
2.273  
2.023  
1.491  
1.430  
1.245  
1.207  
0.892  
0.870  
0.847

-0.000

fj-2-018-purity  
2019-06-23 16:00:51.078  
SOLVENT: CDCl3  
NA = 8  
F1 = 300.130005 MHz  
F2 = 1.000000 MHz

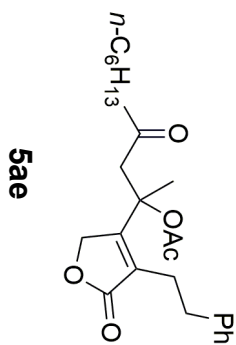

Purity (97%) is determined by mesitylene (5  $\mu$ L, 0.11 mmol)  
as the internal standard in 38.3 mg of sample.

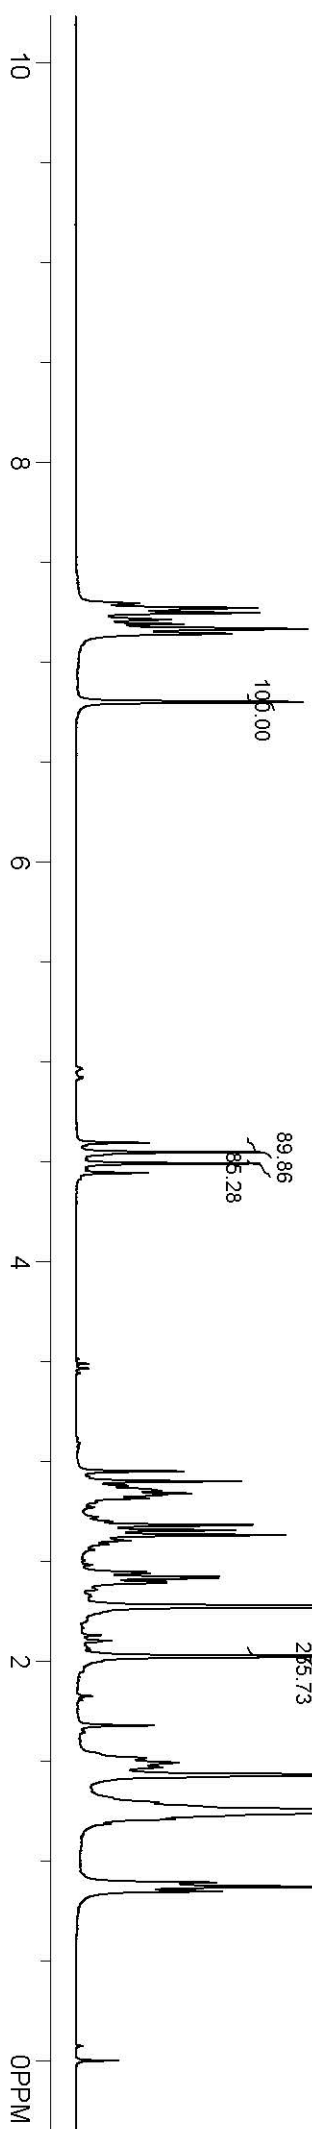

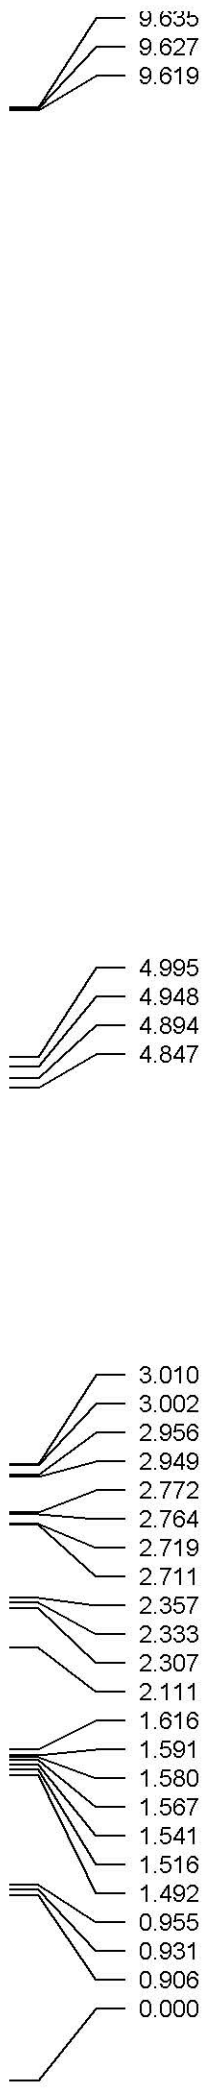

fil-2-023  
2019-06-27 14:00:31.484  
SOLVENT: CDCl3  
NA = 8  
F1 = 300.130005 MHz  
F2 = 1.000000 MHz

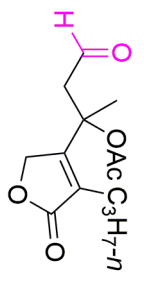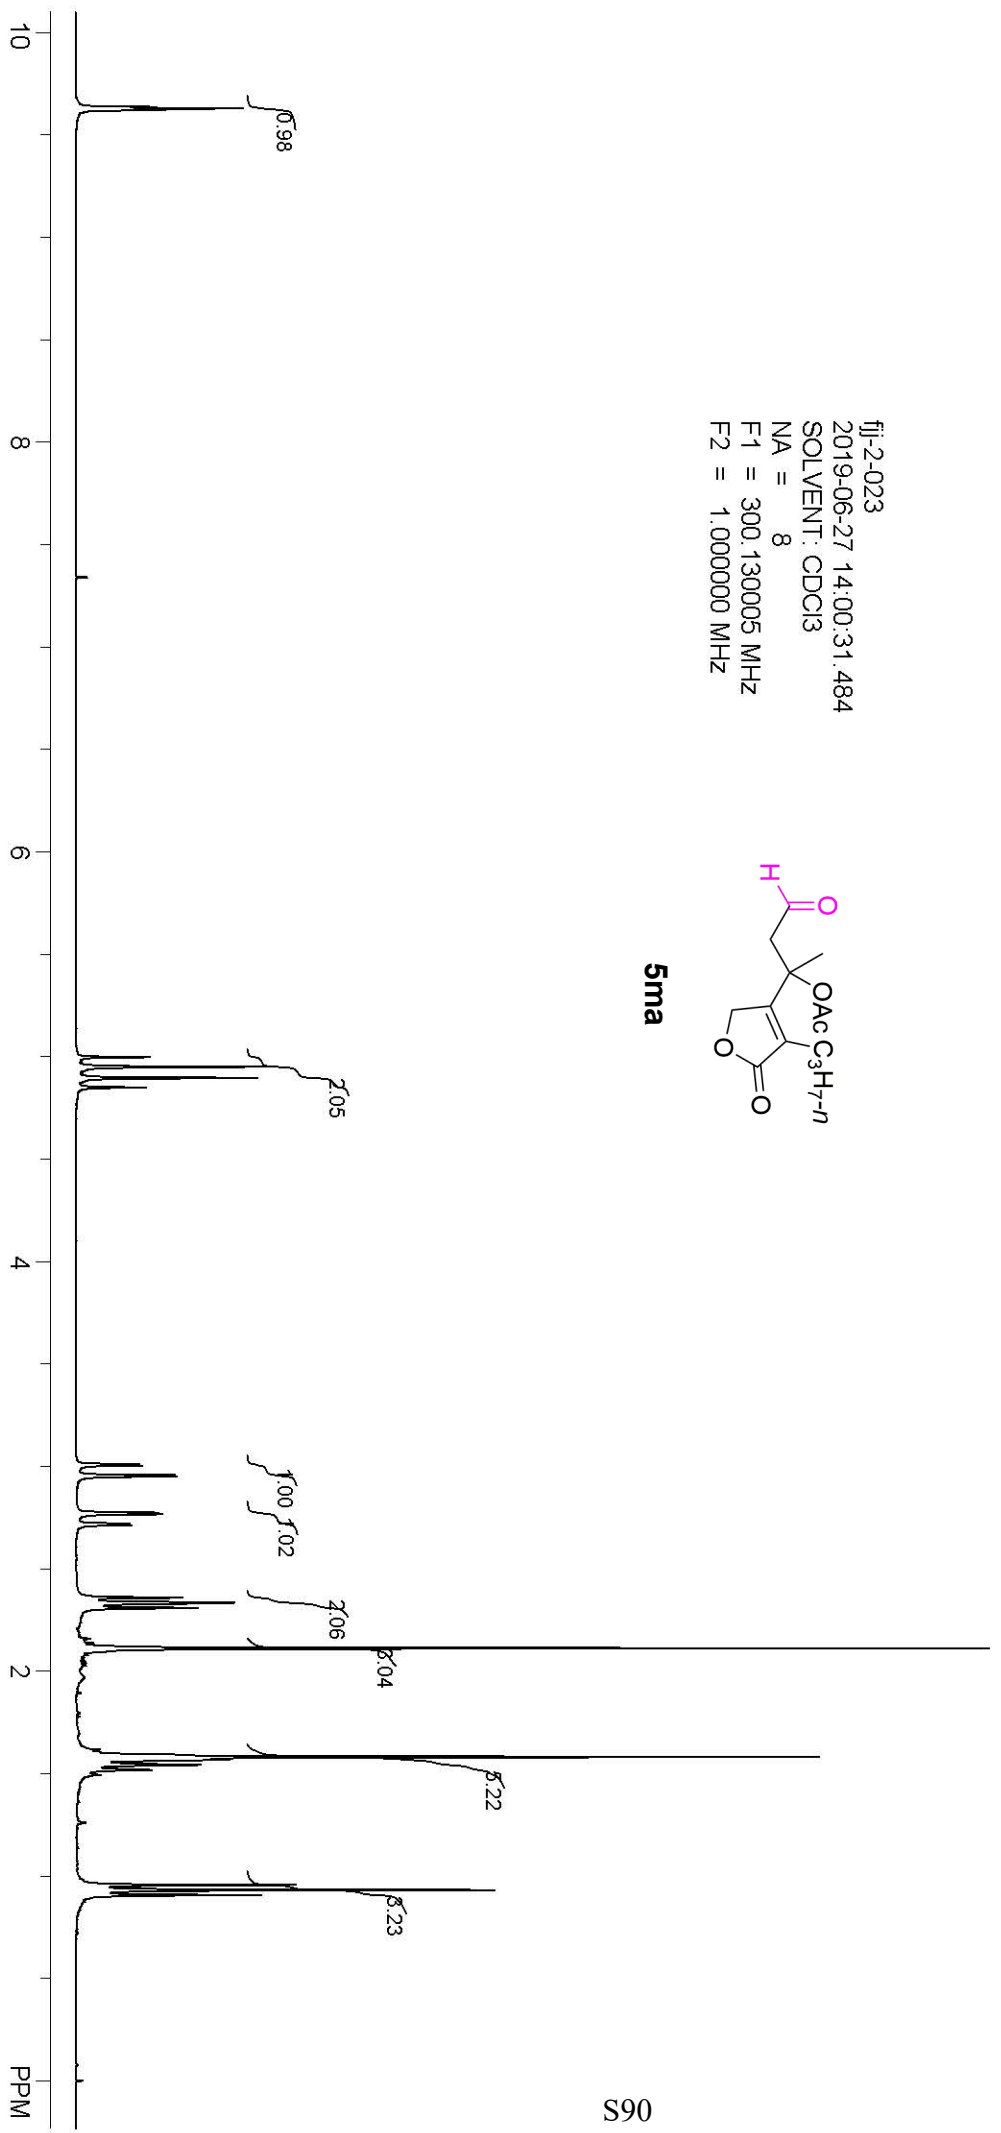

fl-2-023  
2019-06-27 14:10:35.203  
SOLVENT: CDCl3  
NA = 152  
F1 = 75.467751 MHz  
F2 = 1.000000 MHz

**5ma**

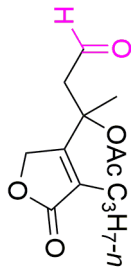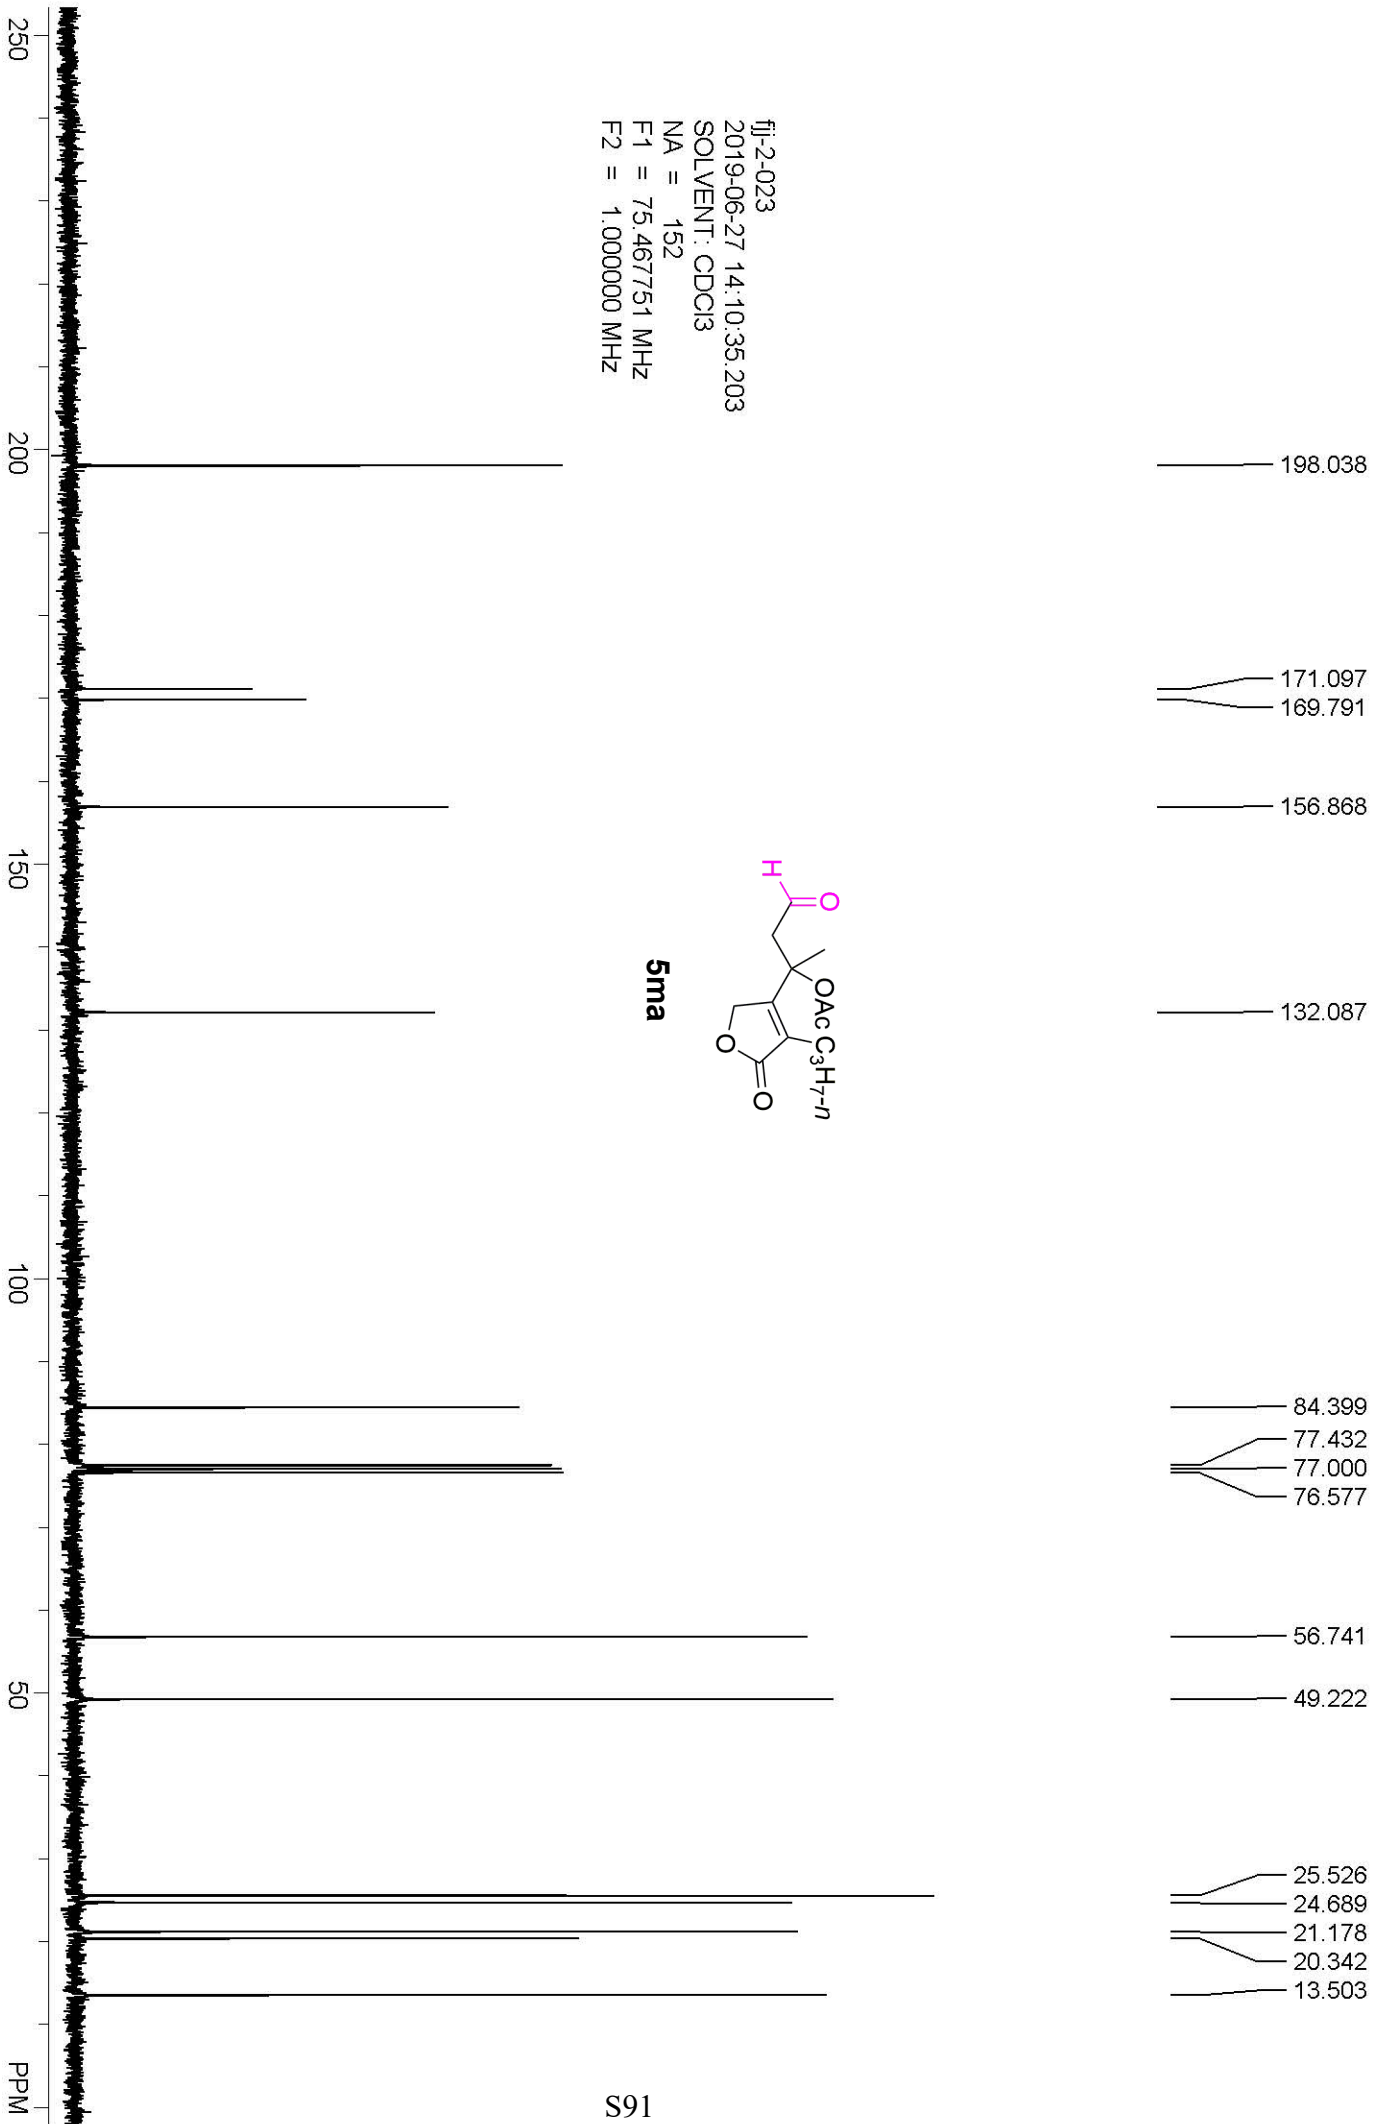

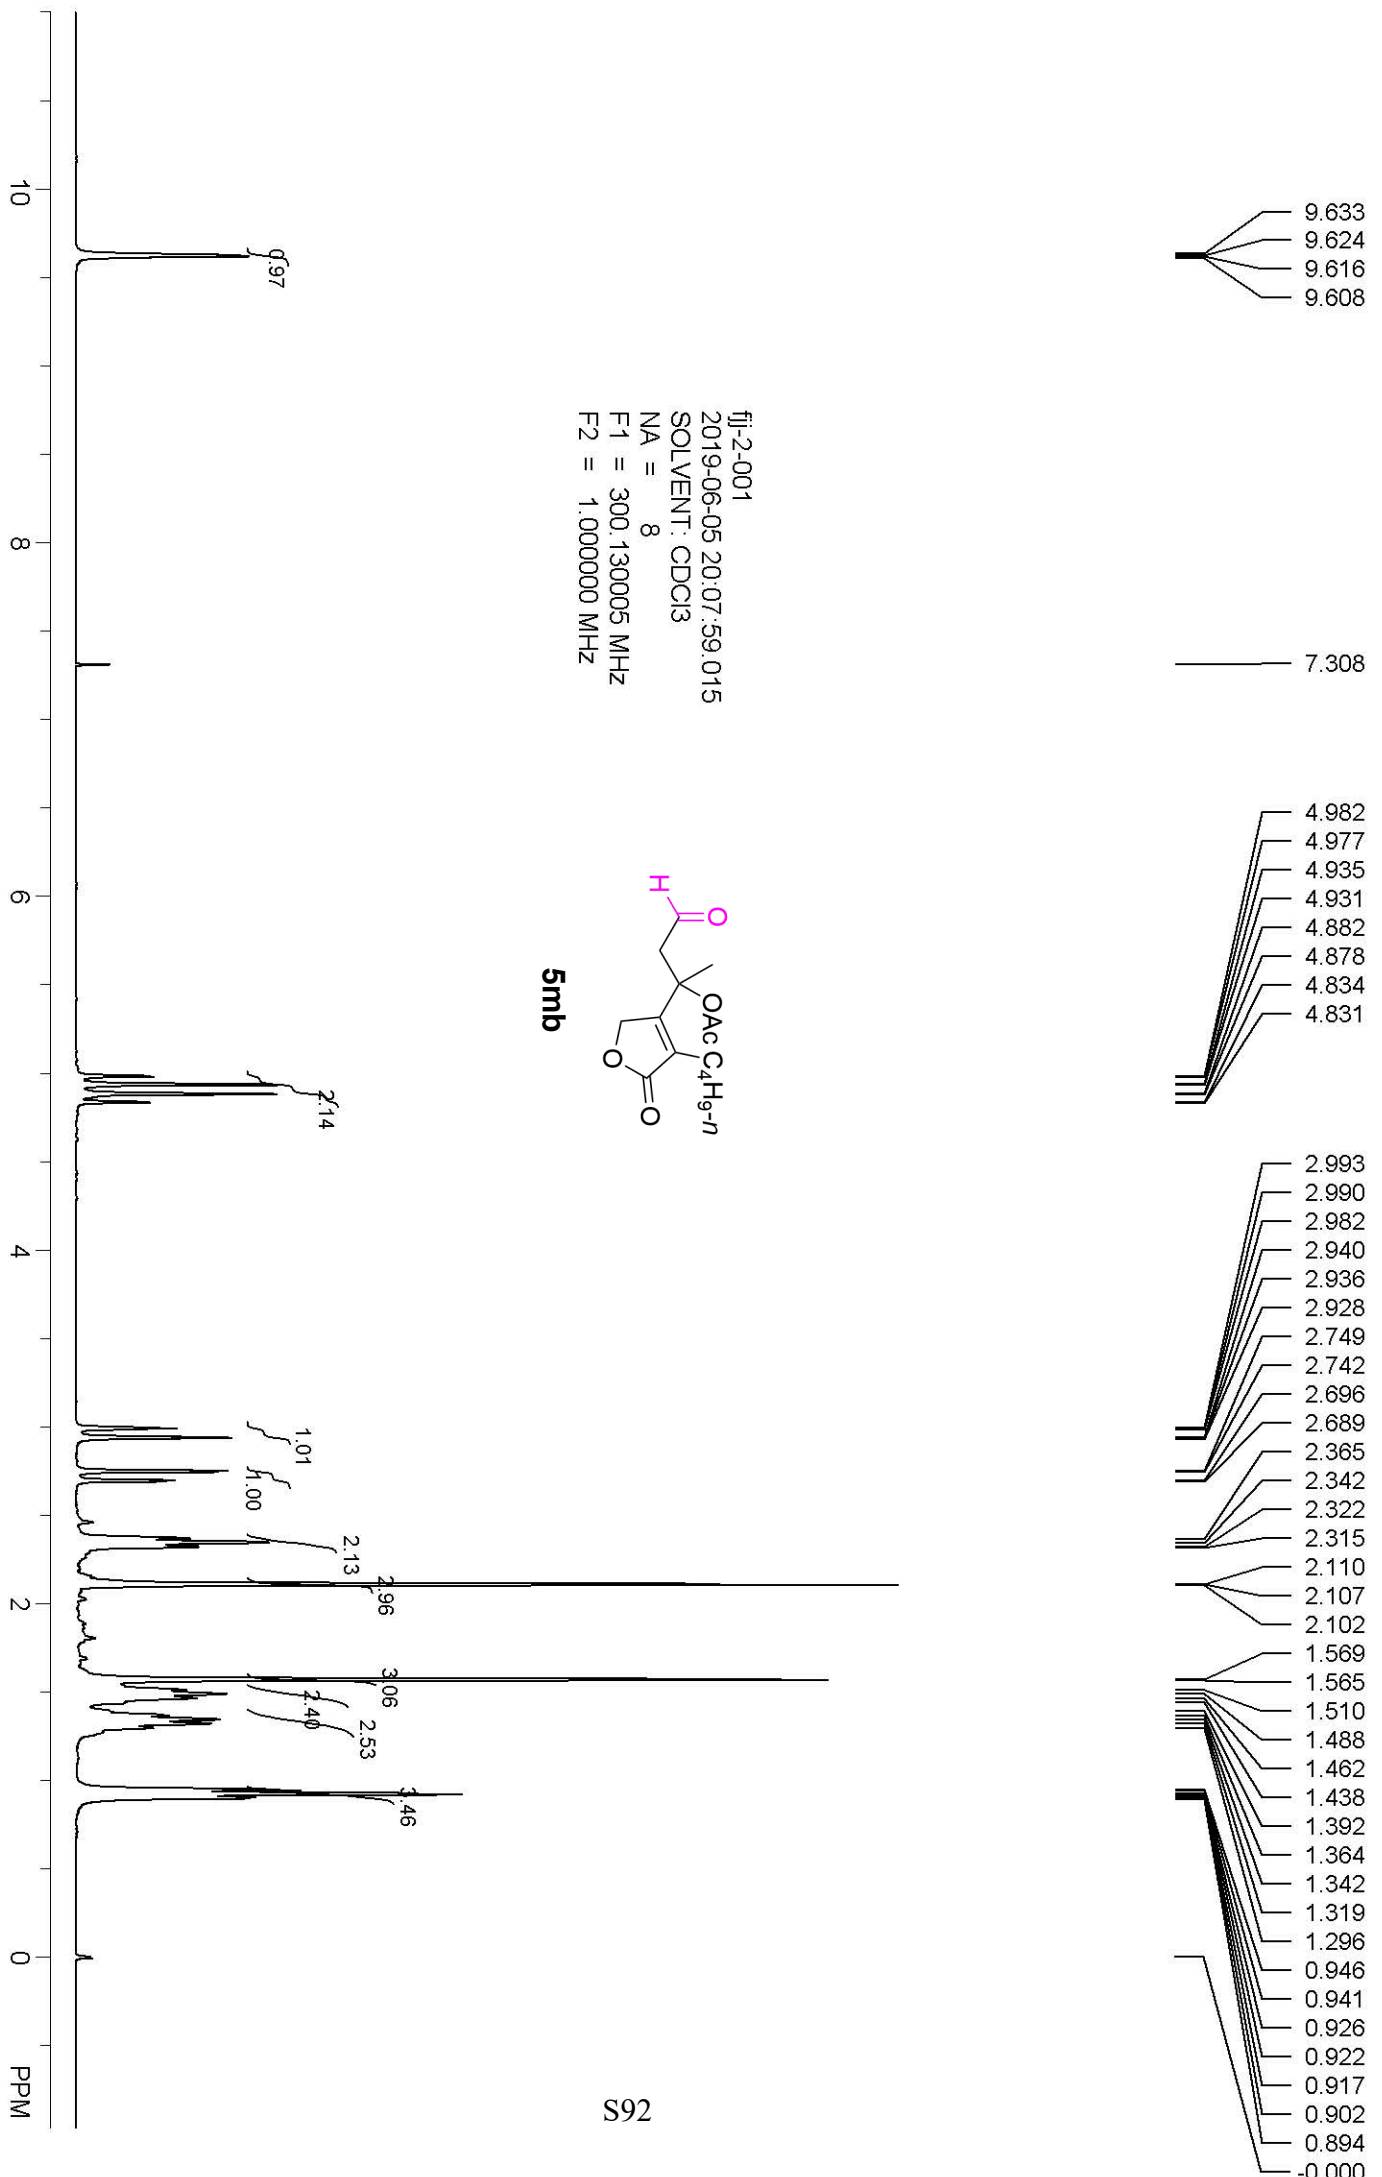

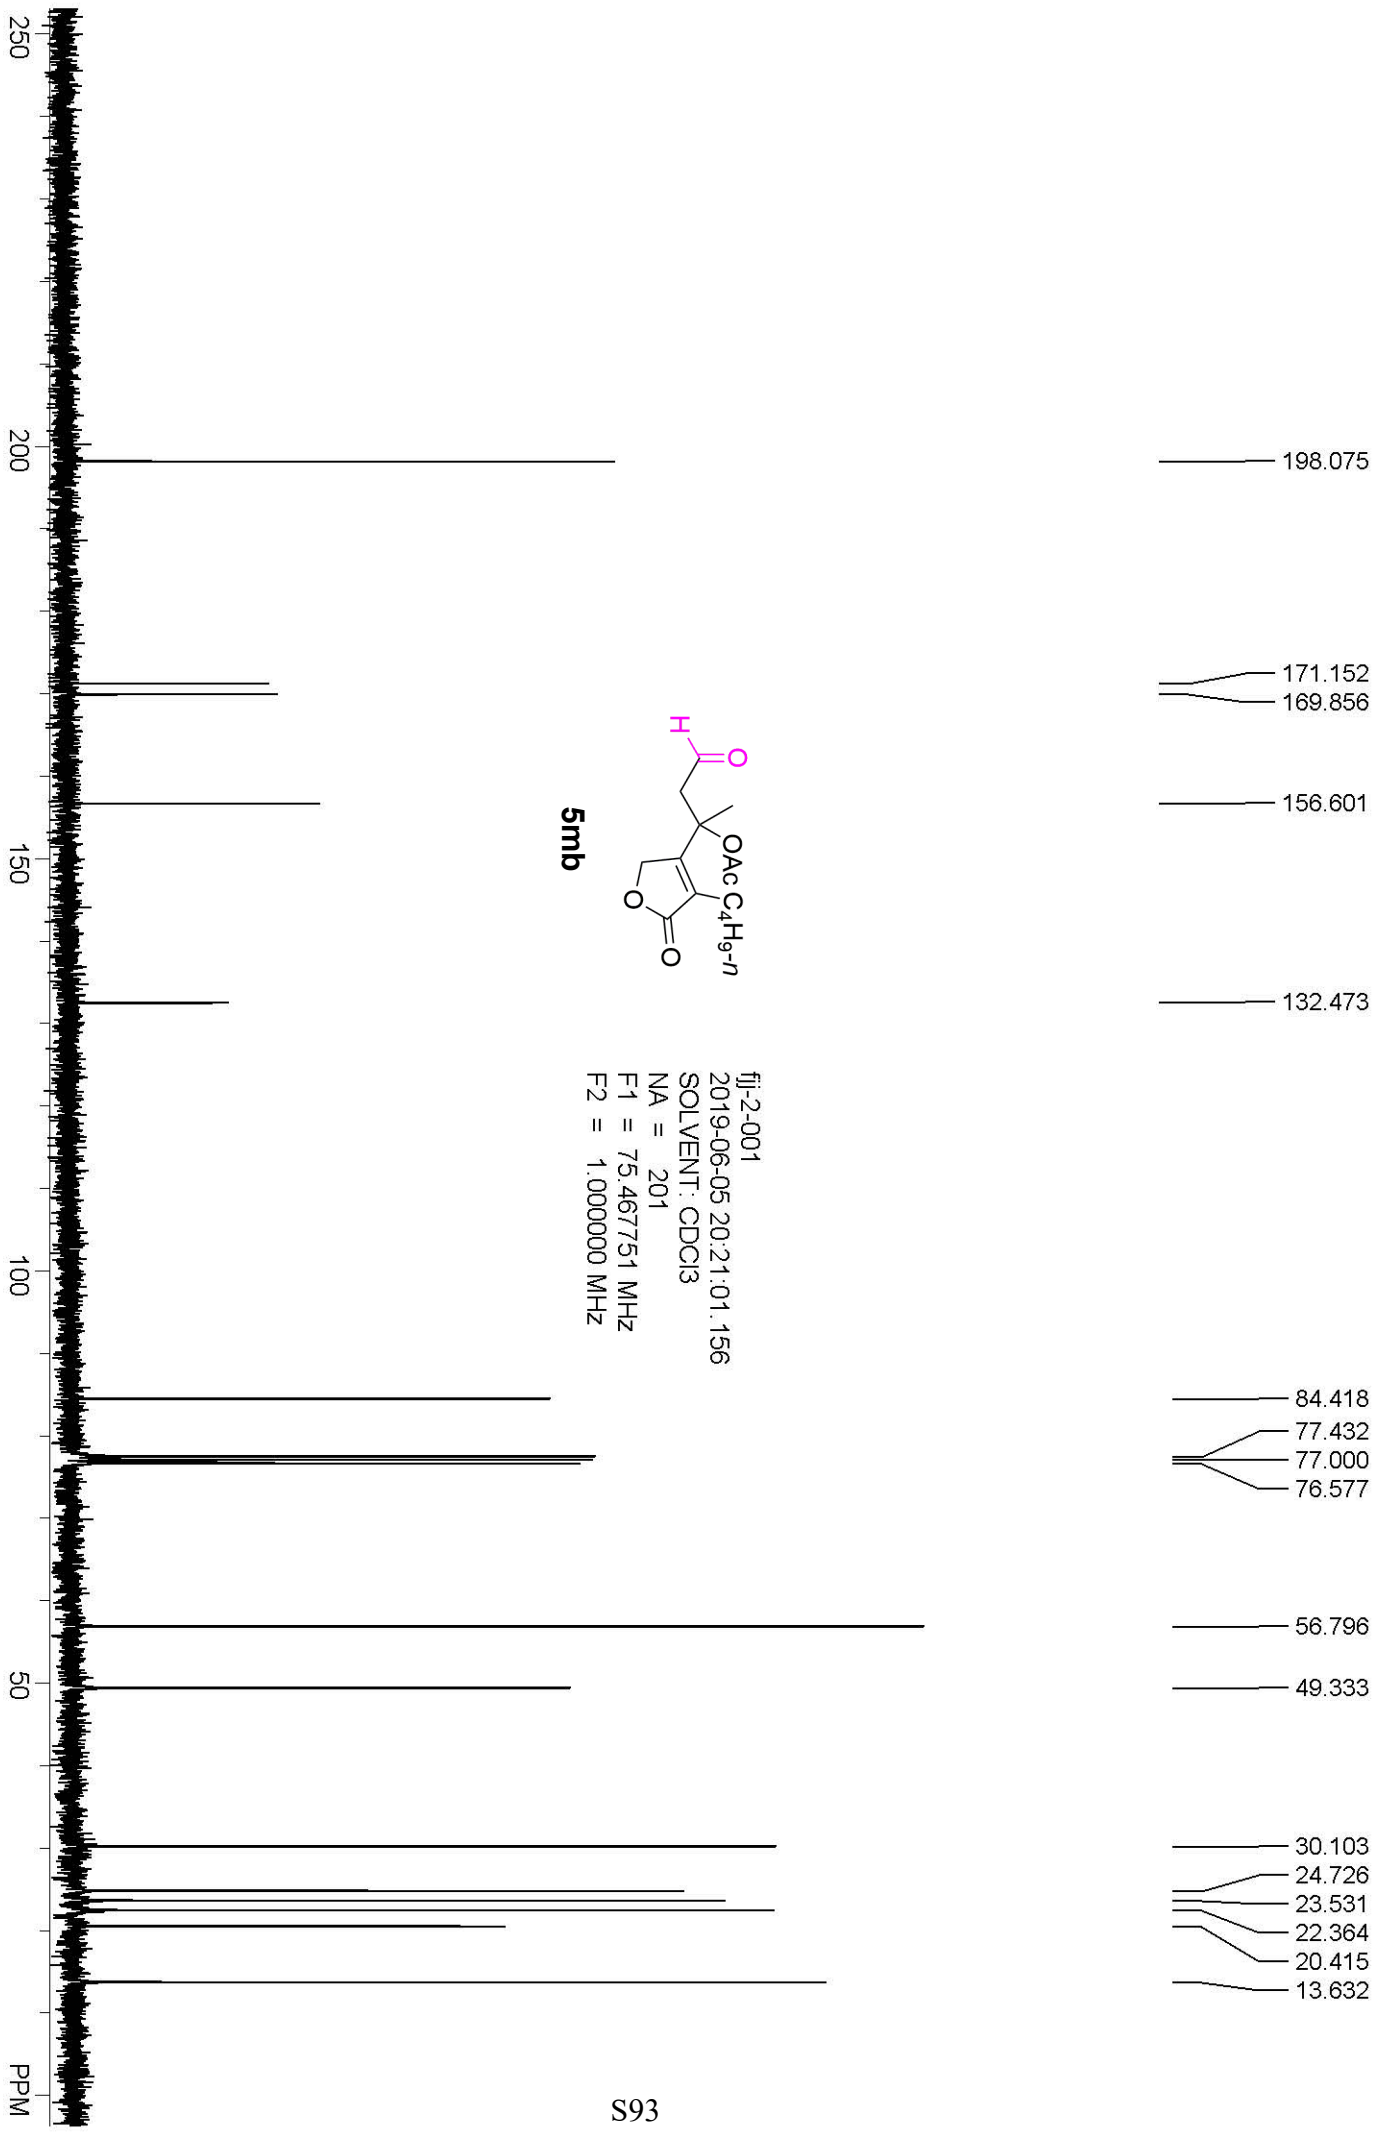

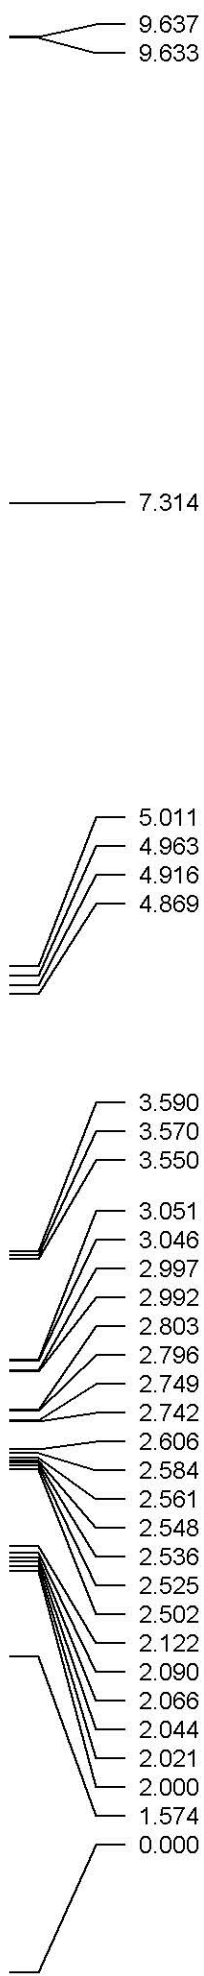

fj-2-094  
2019-10-07 22:04:30.703  
SOLVENT: CDCl3  
NA = 8  
F1 = 300.130005 MHz  
F2 = 1.000000 MHz

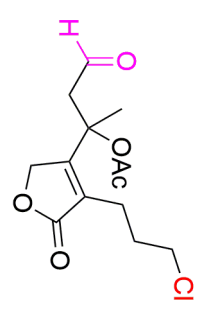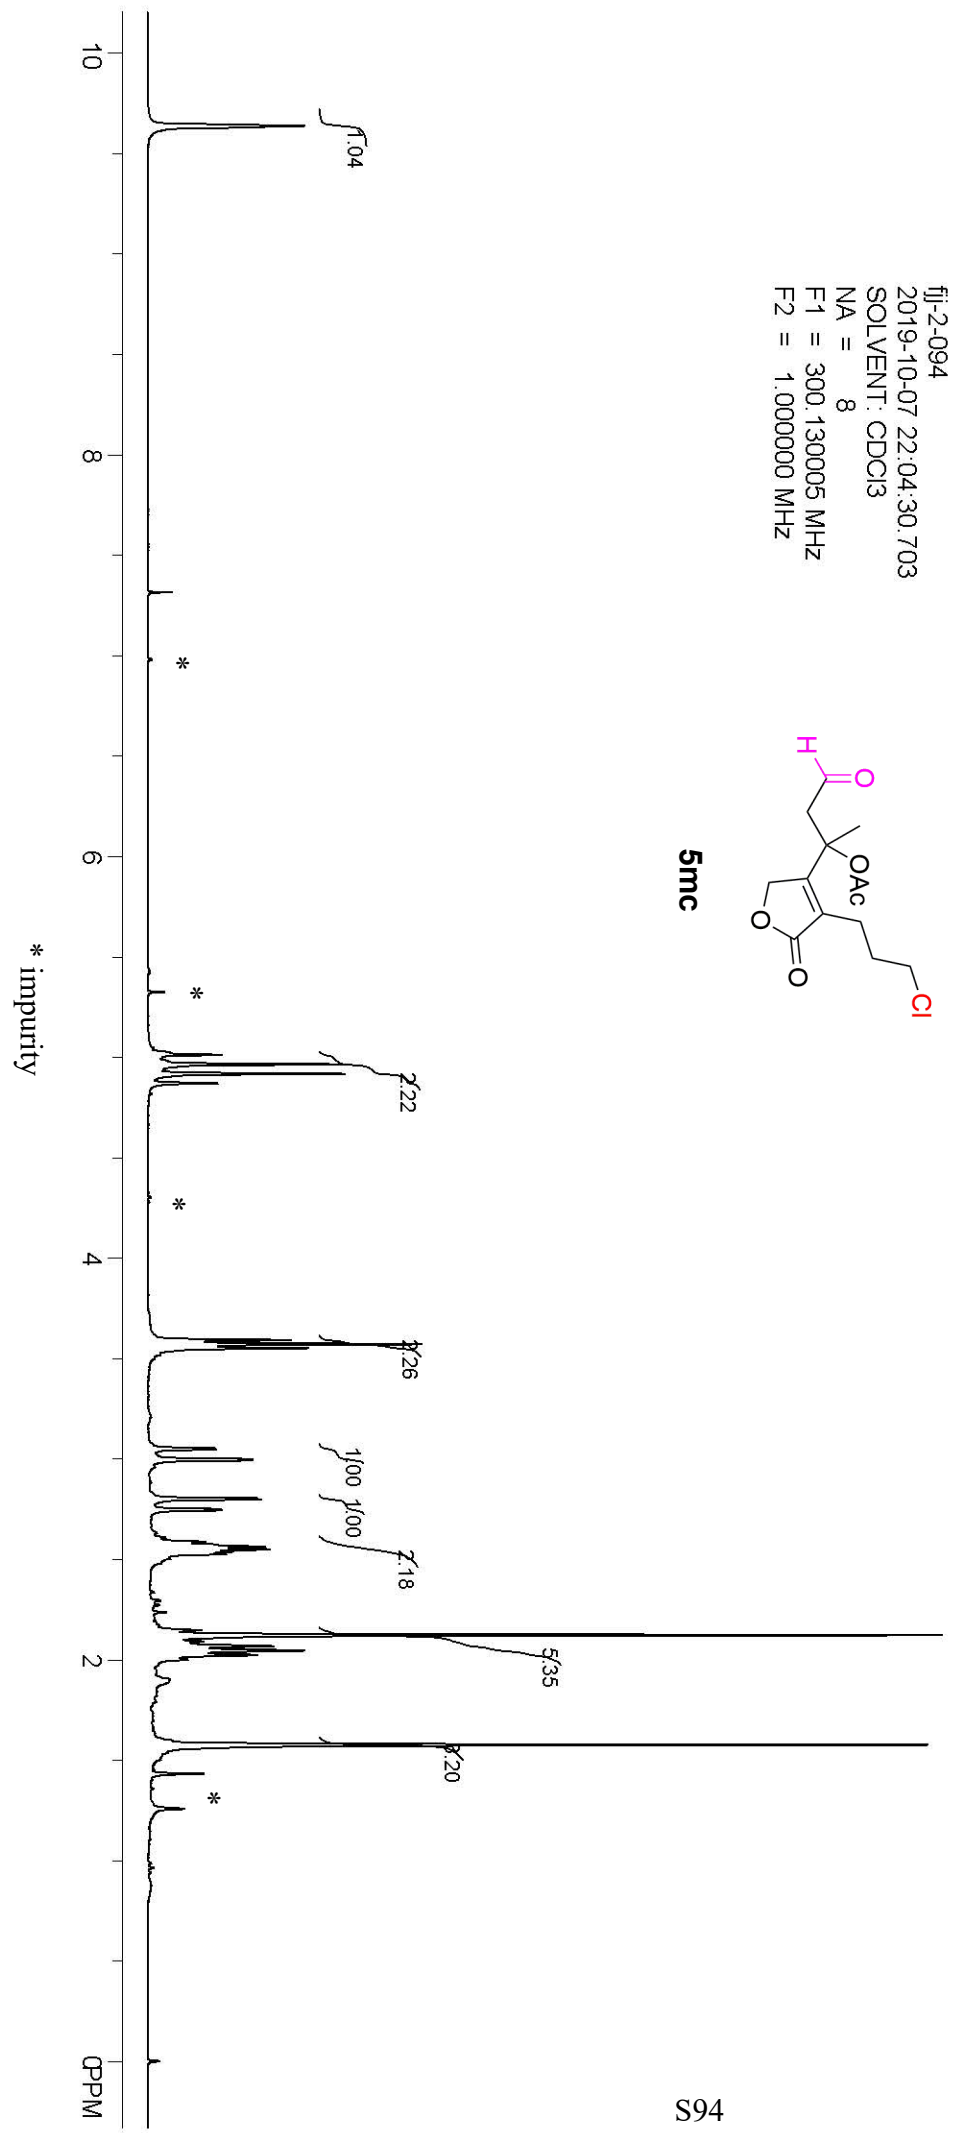

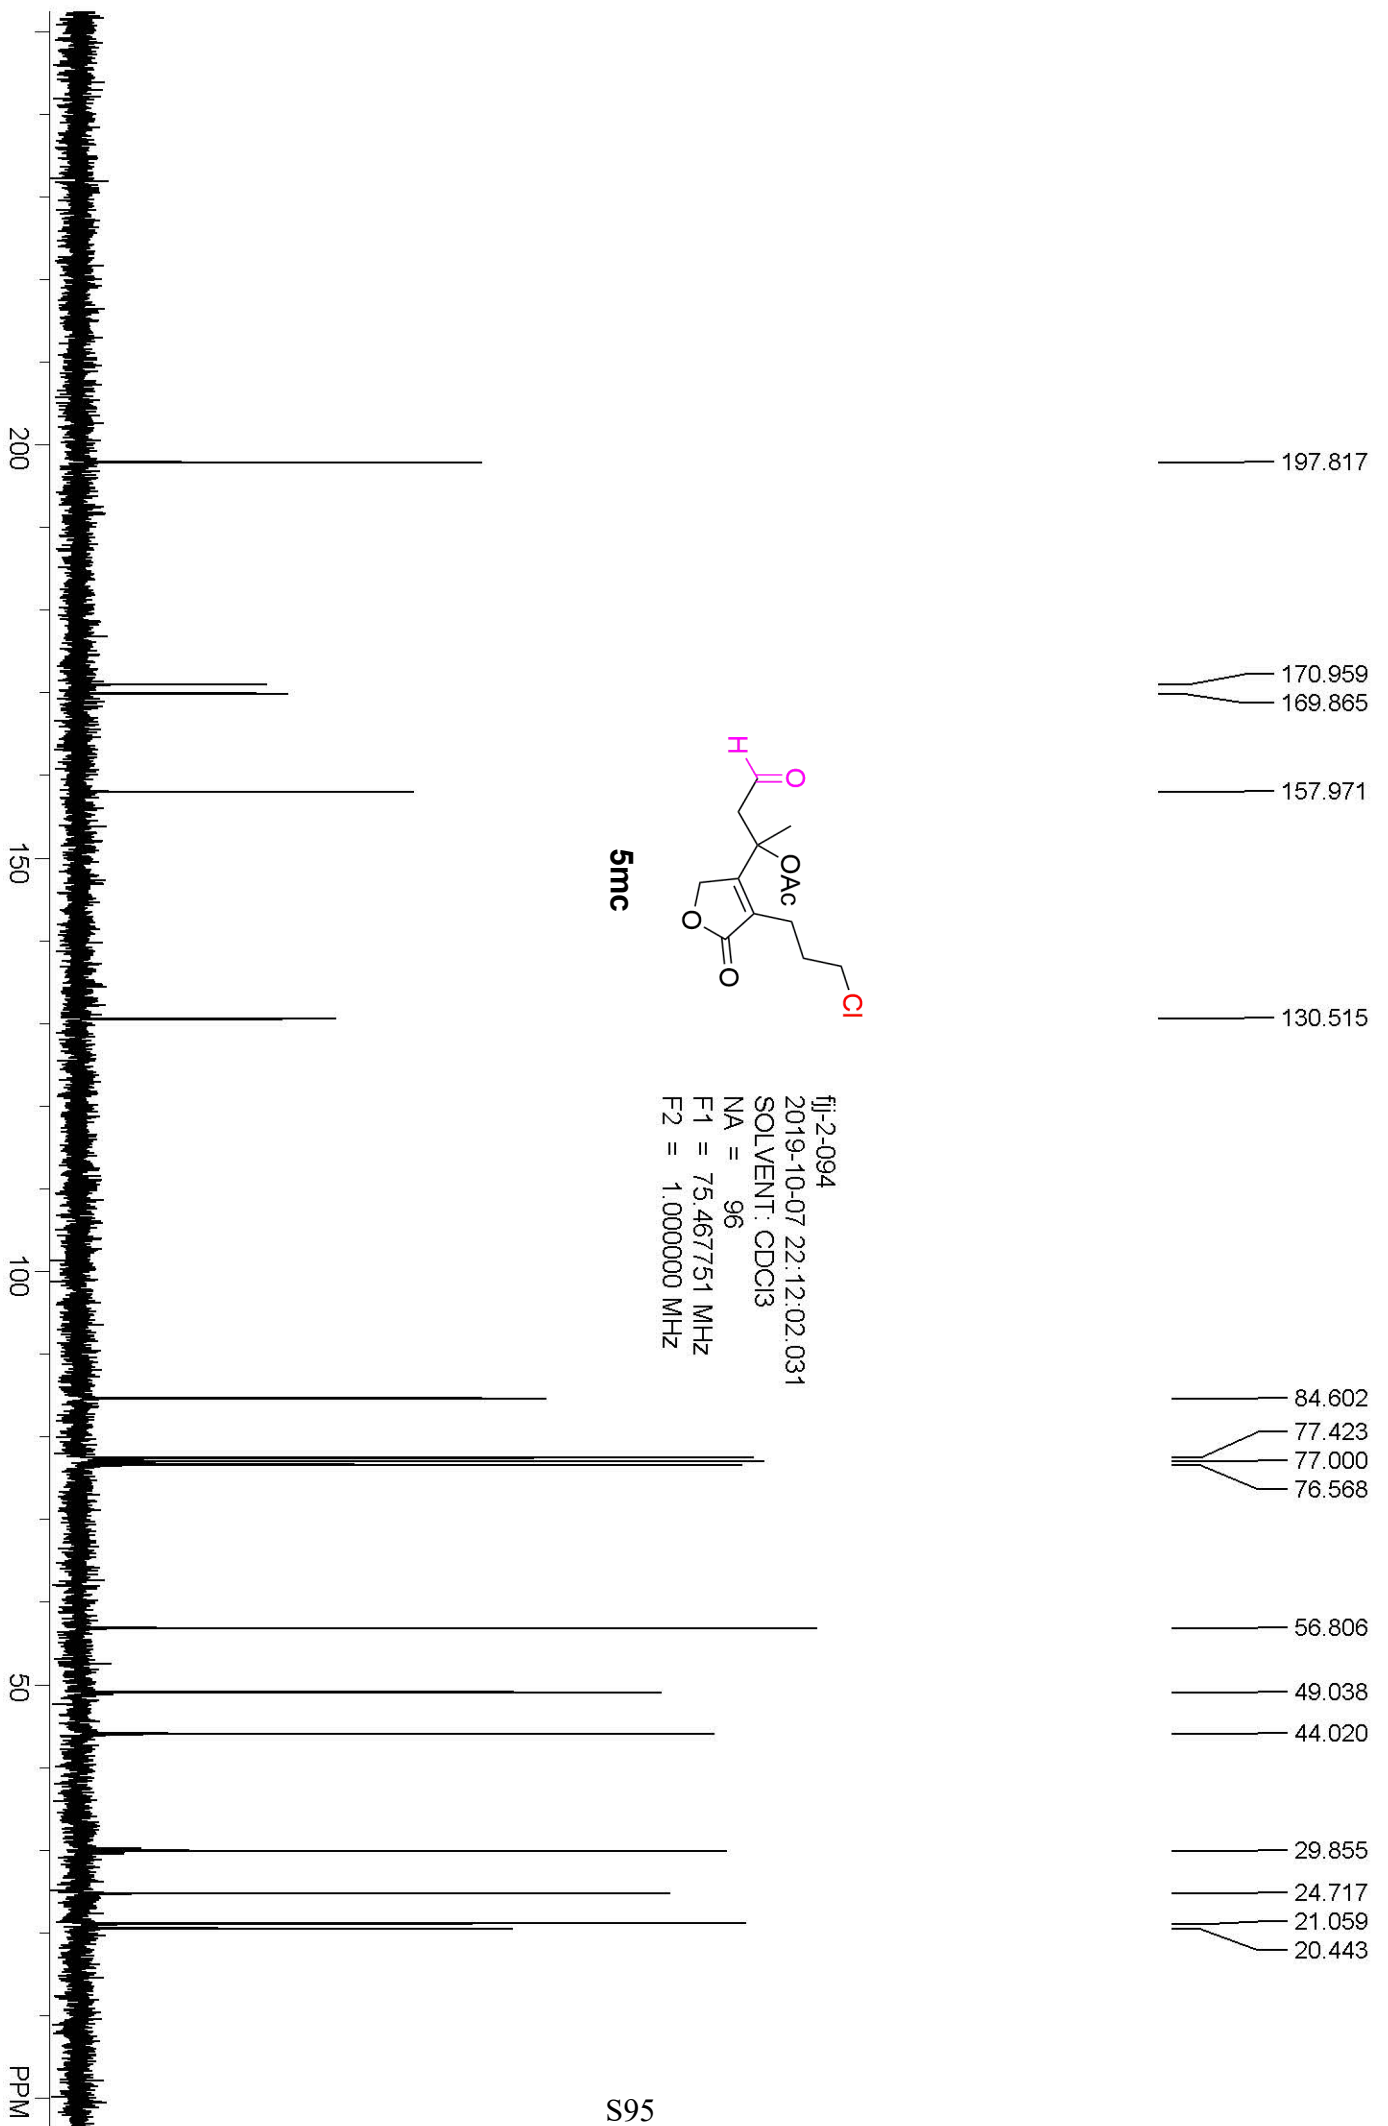

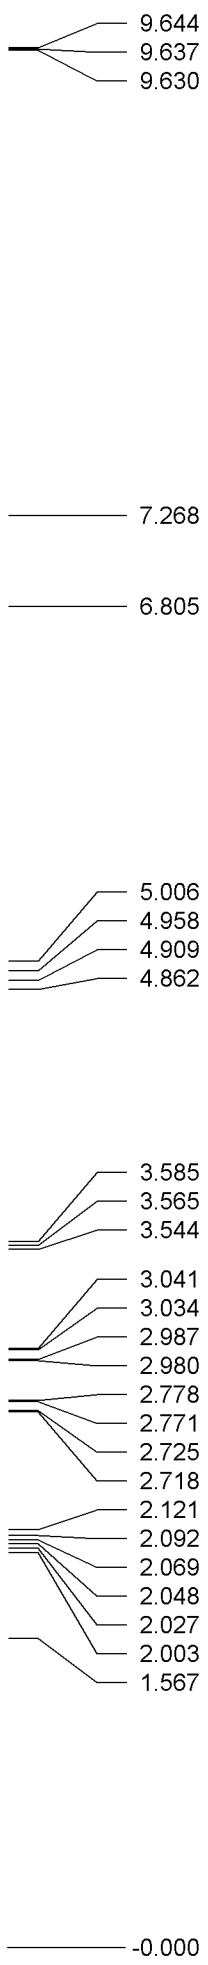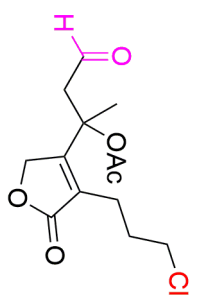

**5mc**

fj-2-094-purity  
 2019-10-08 13:55:55.078  
 SOLVENT: CDCl3  
 NA = 8  
 F1 = 300.130005 MHz  
 F2 = 1.000000 MHz

purity (95%) is determined by Mesitylene(11.5 µL, 0.25 mmol) as the internal standard in 49.3 mg of sample.

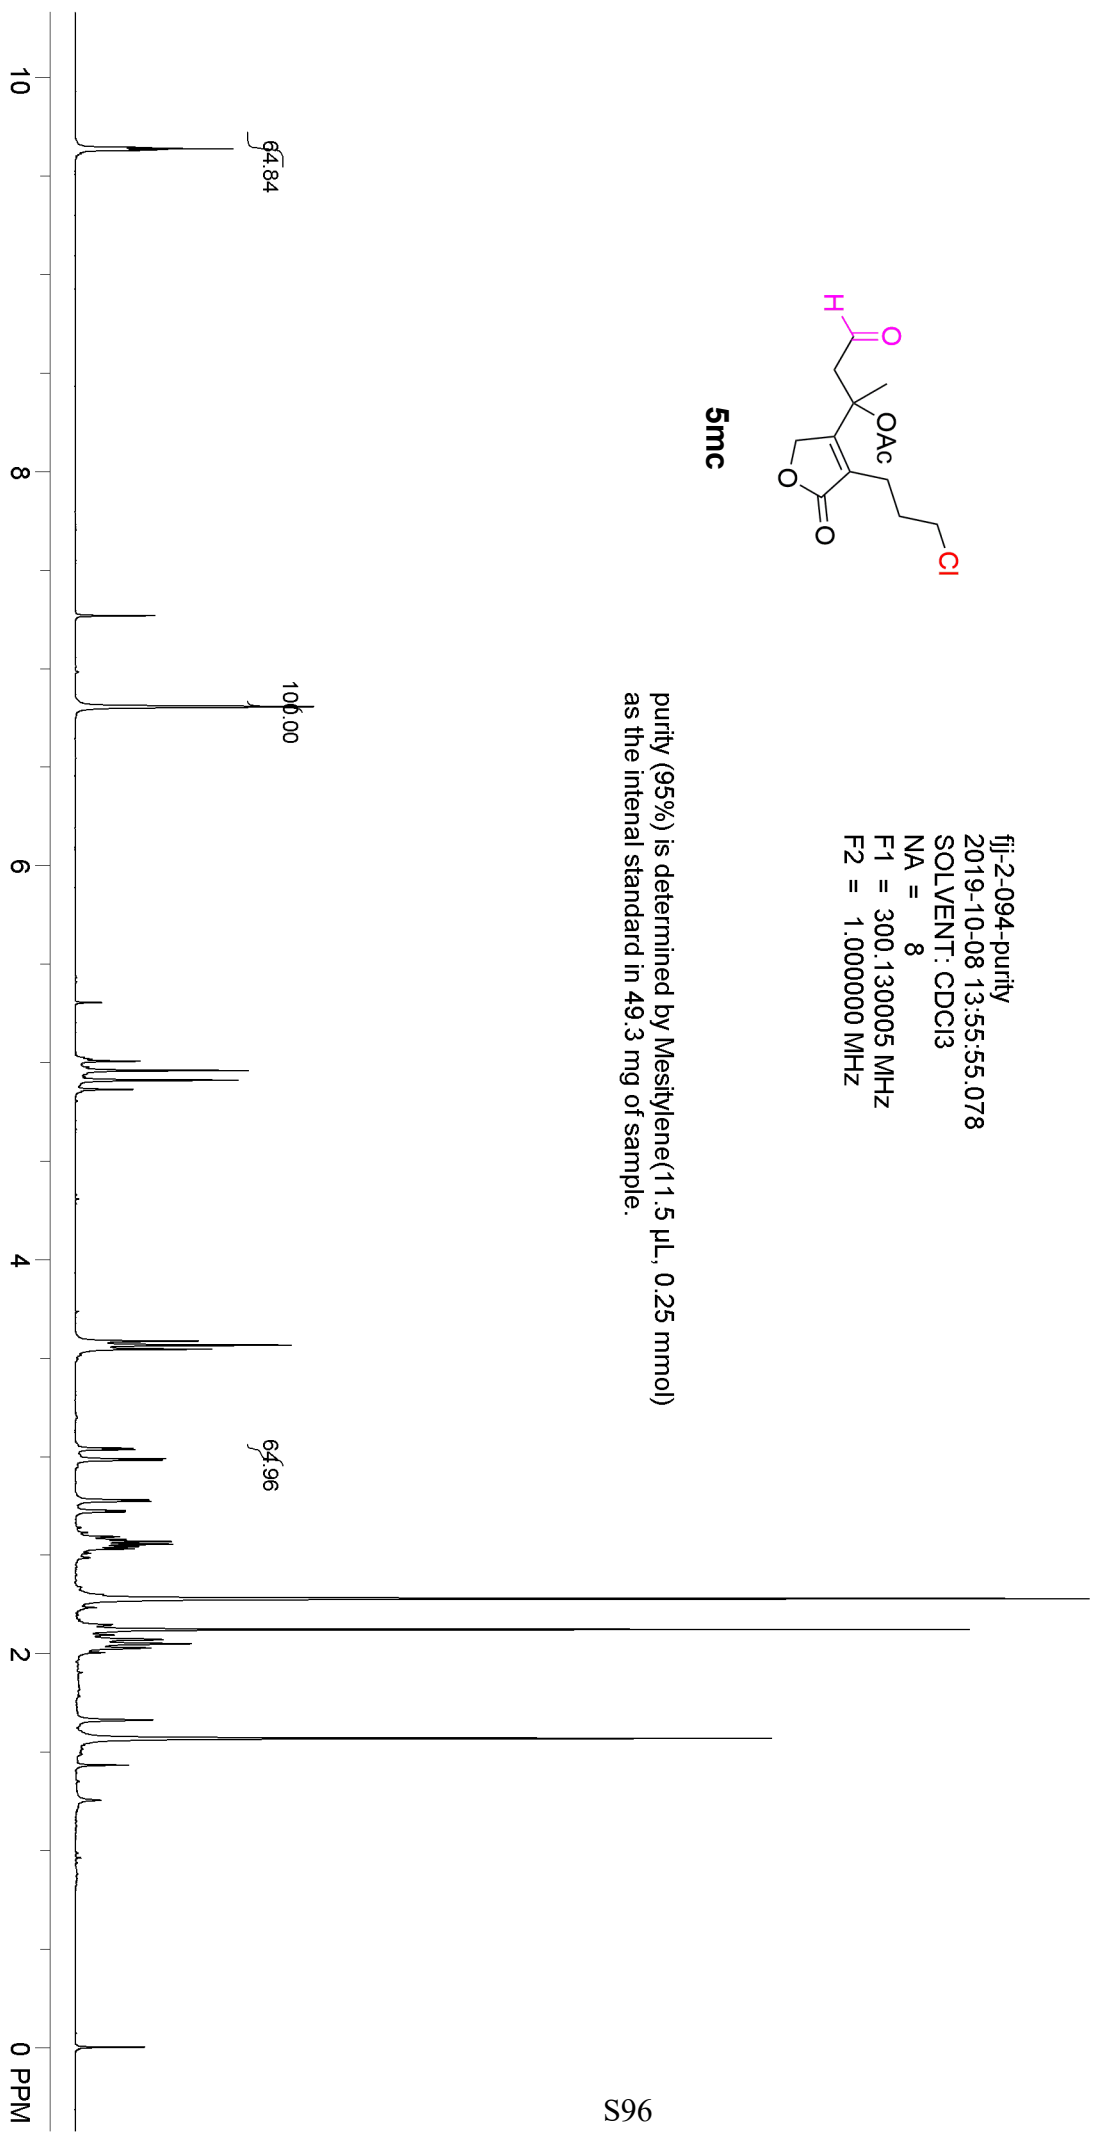



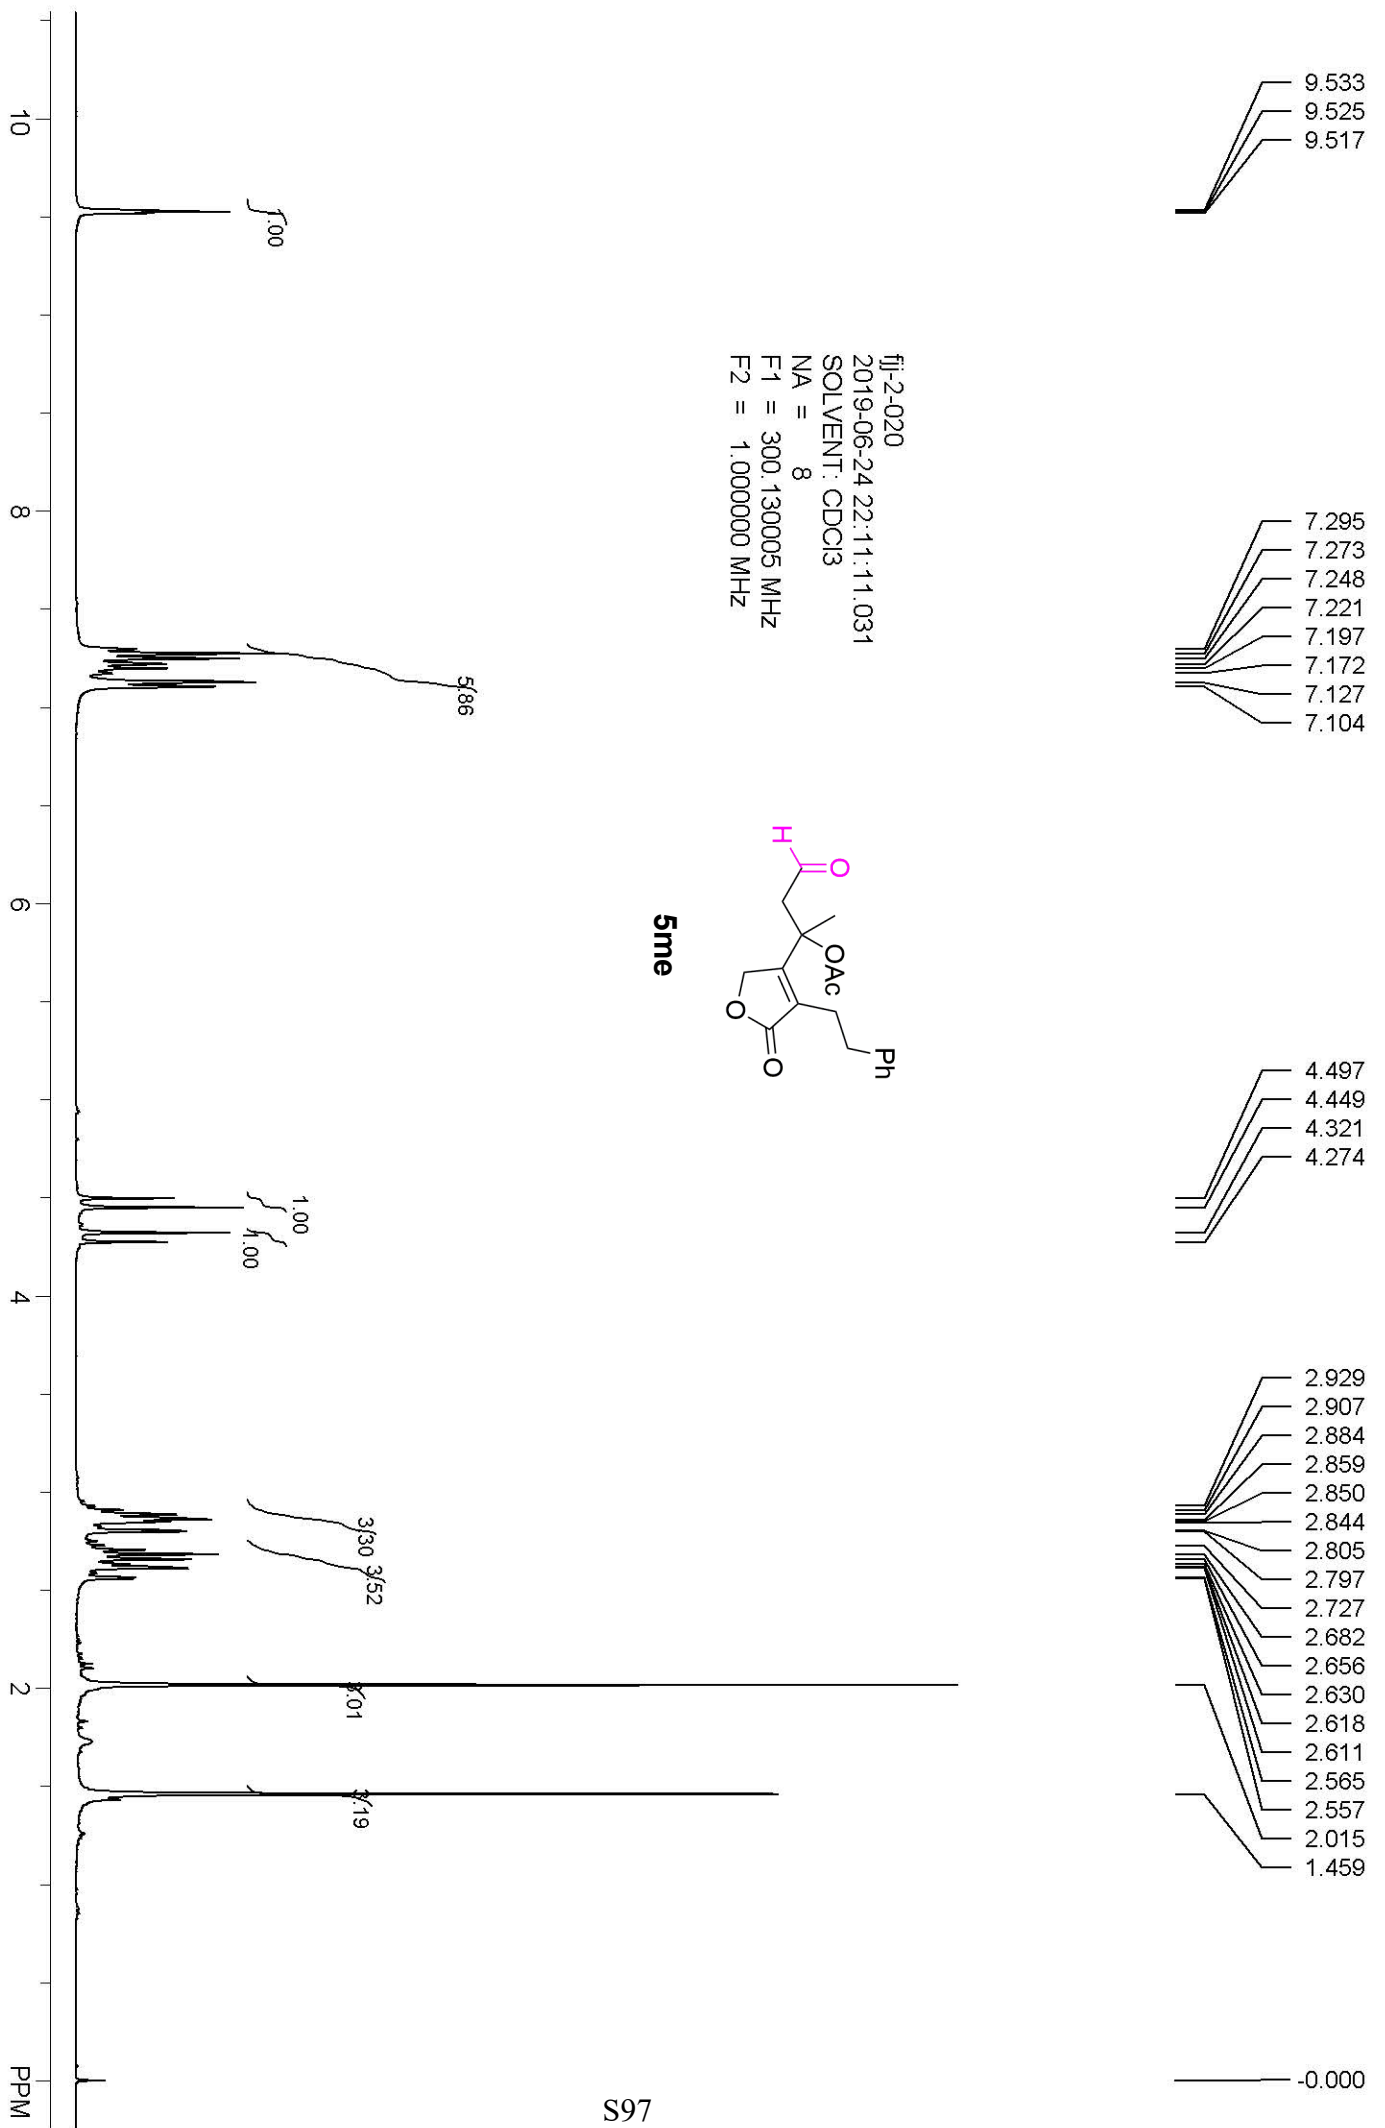

fl-2-020  
2019-06-24 22:29:34.750  
SOLVENT: CDCl3  
NA = 293  
F1 = 75.467751 MHz  
F2 = 1.000000 MHz

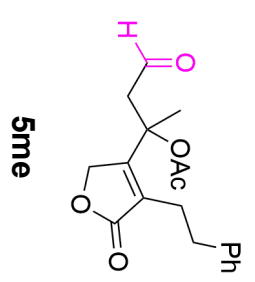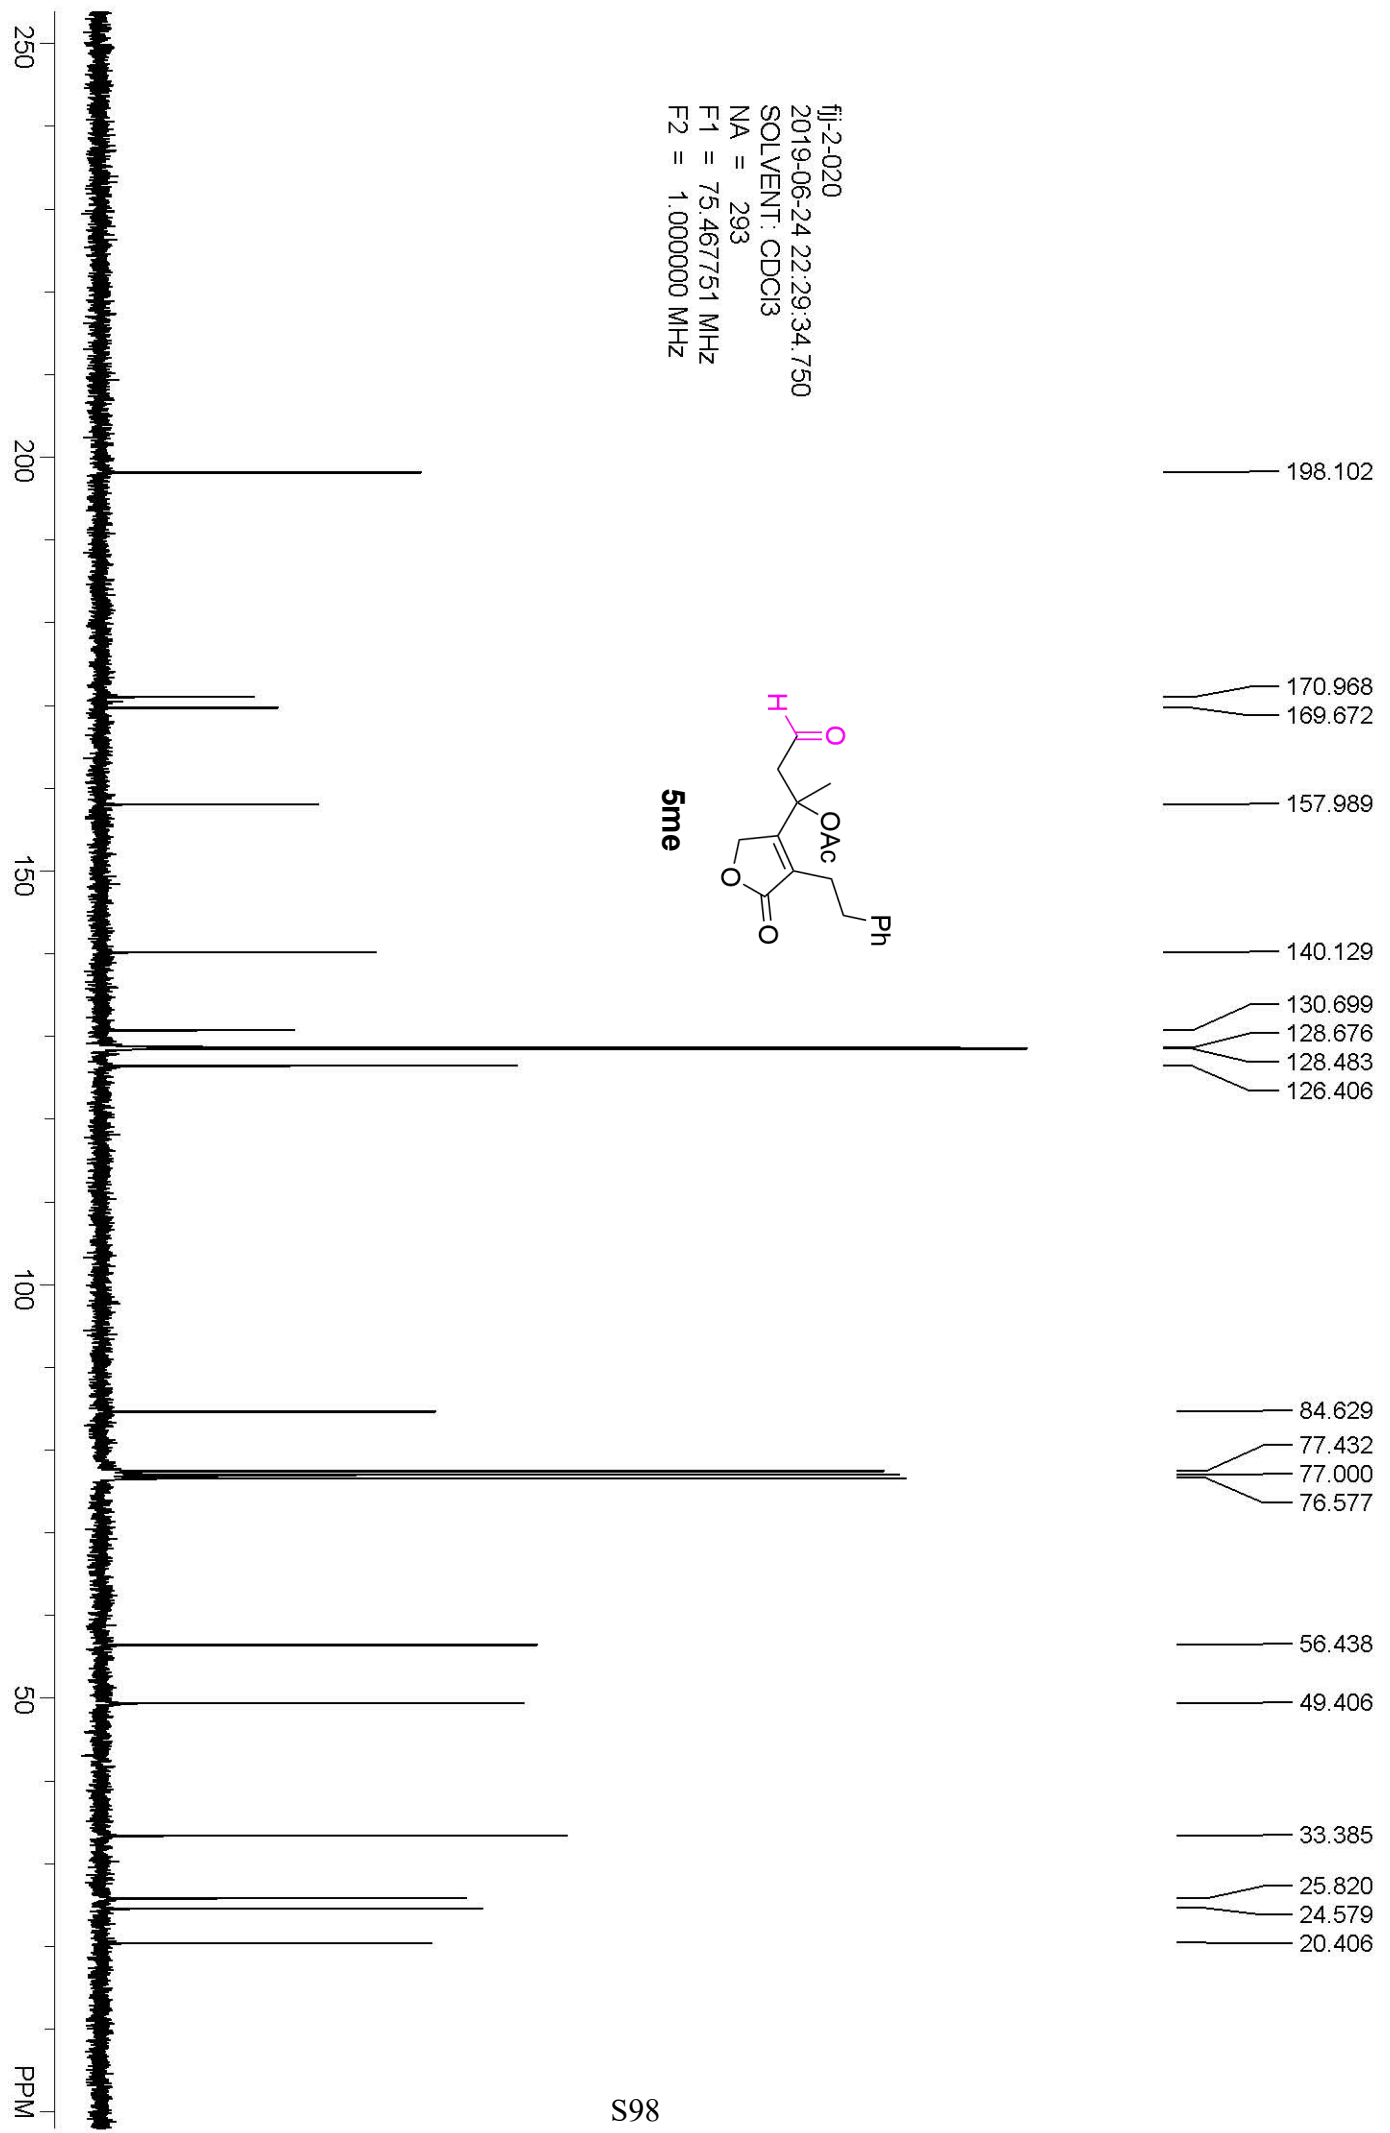

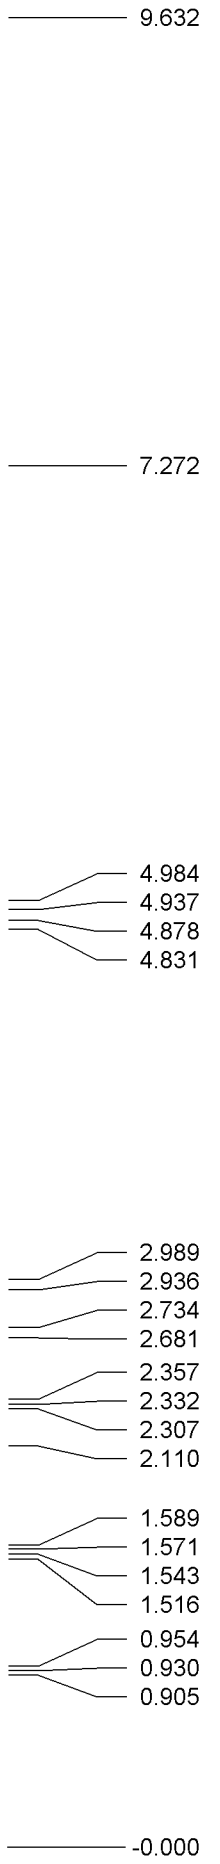

fj-2-083  
 2019-09-26 09:56:25.156  
 SOLVENT: CDCl3  
 NA = 8  
 F1 = 300.130005 MHz  
 F2 = 1.000000 MHz

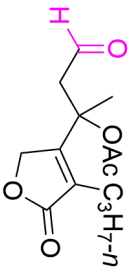

5ma for gram scale reaction

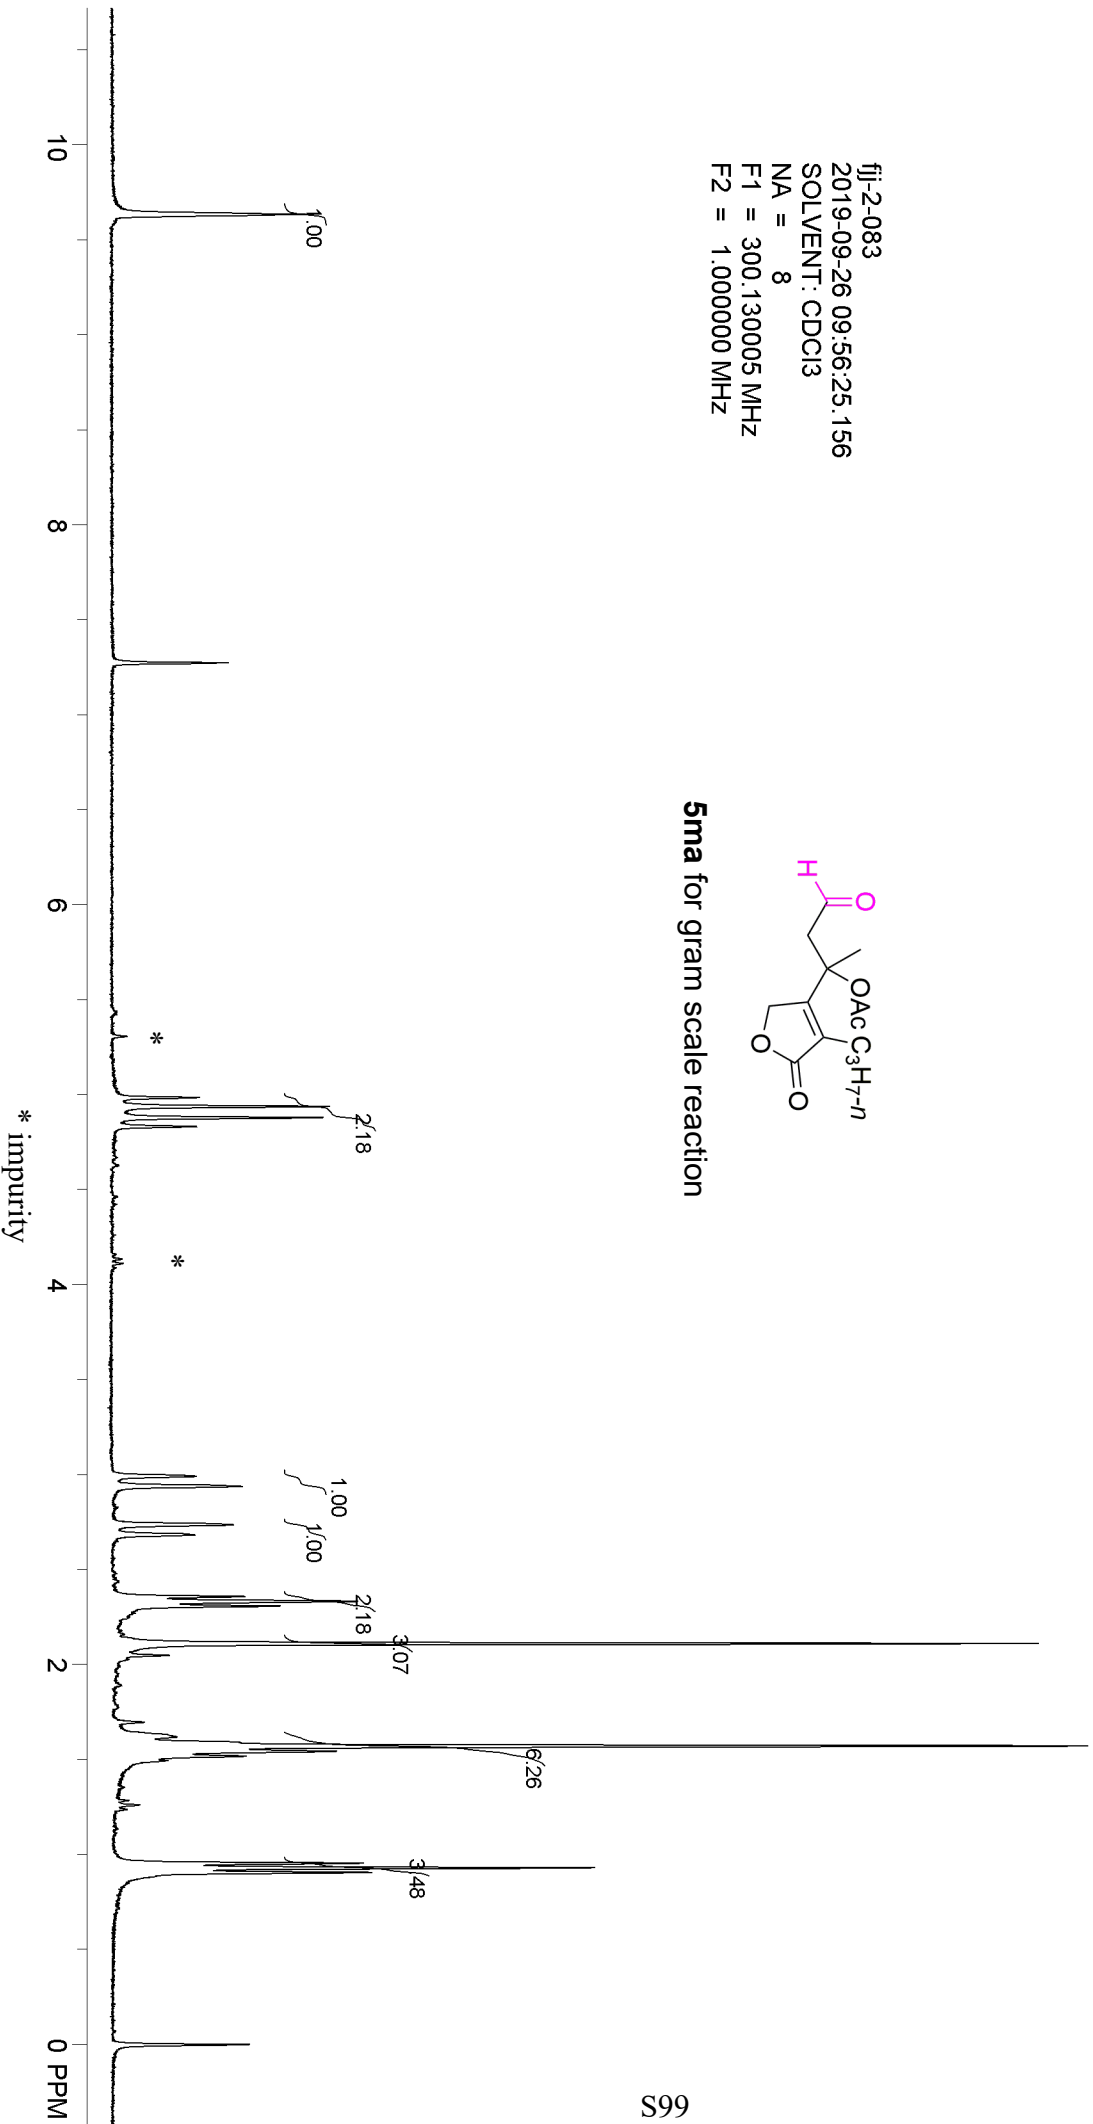

- 7.273
- 6.723
- 6.698
- 6.672
- 6.646
- 6.621
- 6.072
- 6.048
- 6.034
- 6.026
- 6.010
- 5.988
- 5.904
- 5.852
- 4.872
- 4.198
- 4.174
- 4.151
- 4.127
- 3.334
- 3.310
- 3.273
- 3.251
- 3.225
- 3.195
- 3.166
- 2.825
- 2.821
- 2.798
- 2.796
- 2.775
- 2.772
- 2.750
- 2.746
- 2.623
- 2.599
- 2.574
- 2.550
- 2.305
- 2.282
- 2.132
- 2.109
- 1.644
- 1.520
- 1.289
- 1.241
- 0.923
- 0.899
- 0.874
- 0.000

flj-4-017  
 2020-10-29 15:46:06.343  
 SOLVENT: CDCl3  
 NA = 8  
 F1 = 300.130005 MHz  
 F2 = 1.000000 MHz

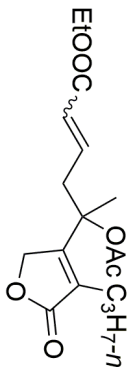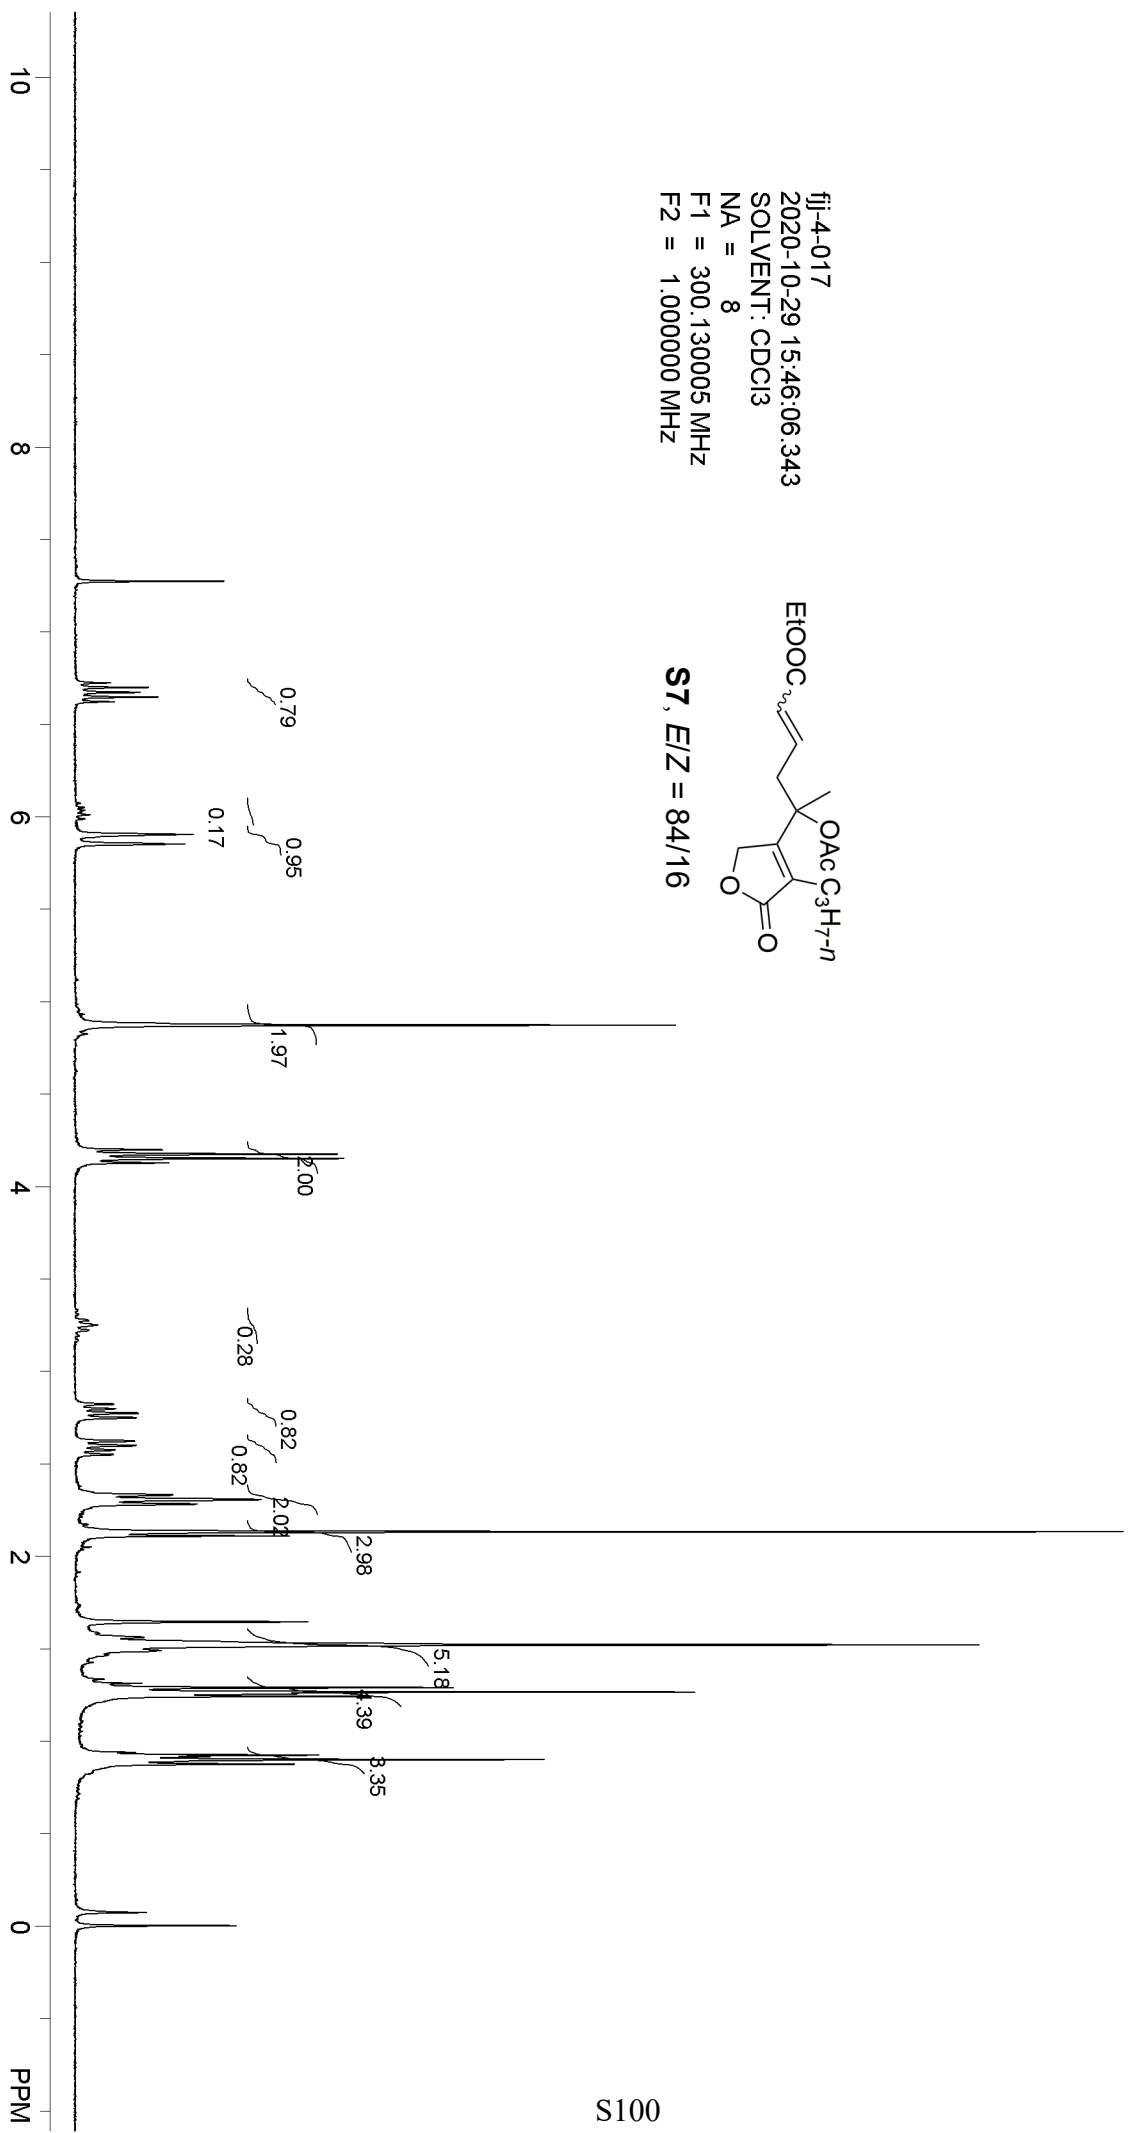

fj-4-018  
 2020-10-30 13:43:29.656  
 SOLVENT: CDCl3  
 NA = 8  
 F1 = 300.130005 MHz  
 F2 = 1.000000 MHz

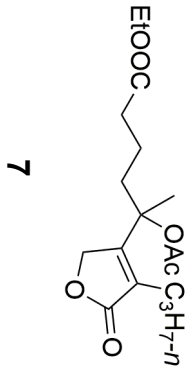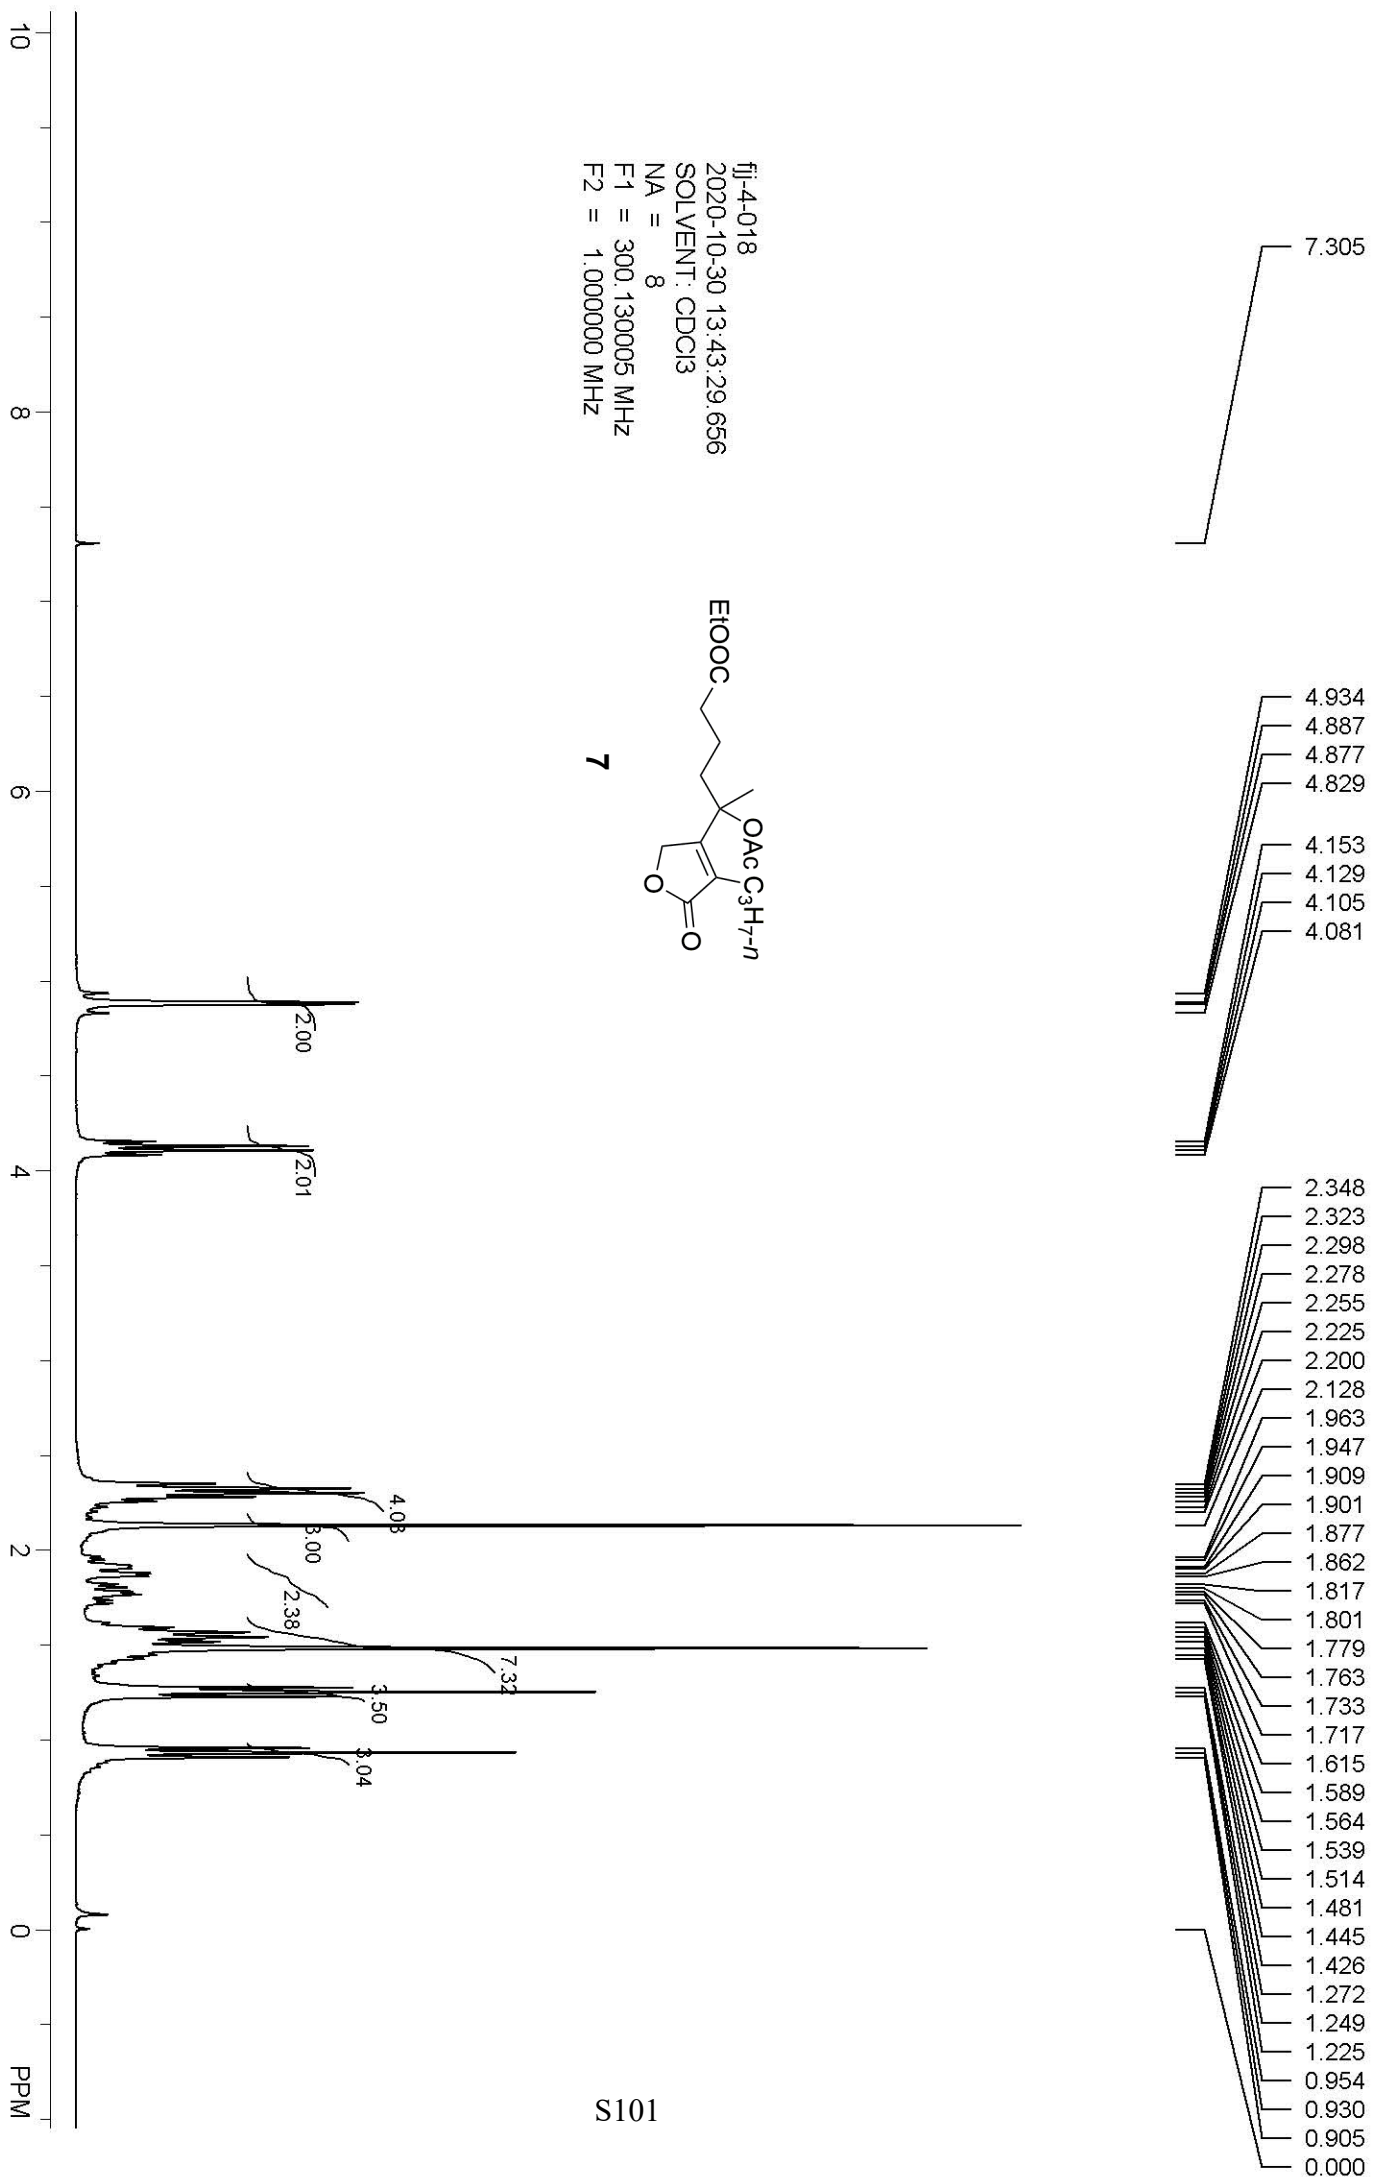

fj-4-018  
 2020-10-30 14:02:25.625  
 SOLVENT: CDCl3  
 NA = 306  
 F1 = 75.467751 MHz  
 F2 = 1.000000 MHz

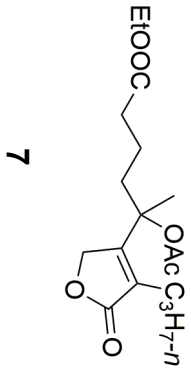

- 172.834
- 172.126
- 170.058
- 157.438
- 131.655
- 86.964
- 77.423
- 77.000
- 76.568
- 60.280
- 57.127
- 36.694
- 33.559
- 25.618
- 24.432
- 21.491
- 20.489
- 18.522
- 14.091
- 13.650

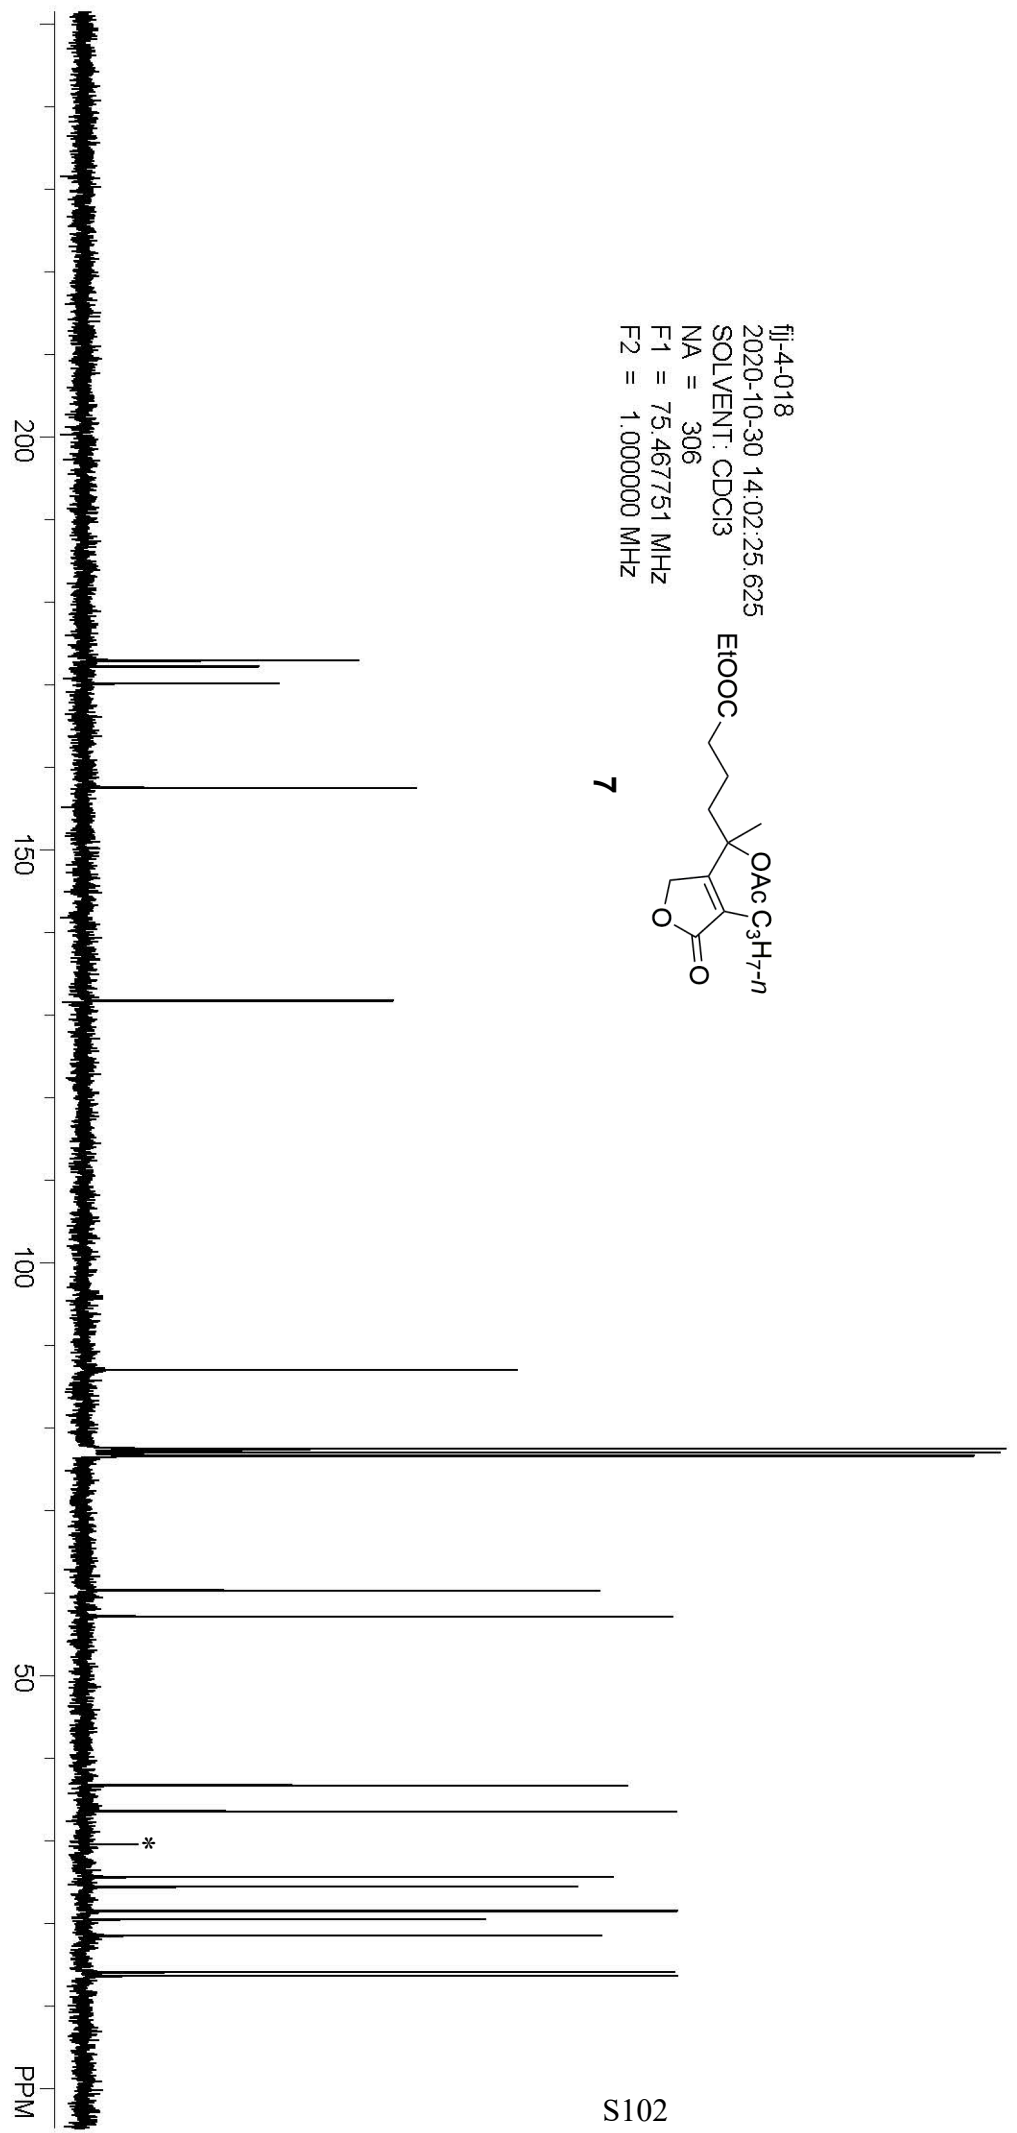

\* from petroleum ether

fil-2-090  
2019-10-03 21:55:40.718  
SOLVENT: CDCl3  
NA = 8  
F1 = 300.130005 MHz  
F2 = 1.000000 MHz

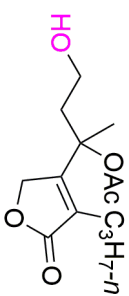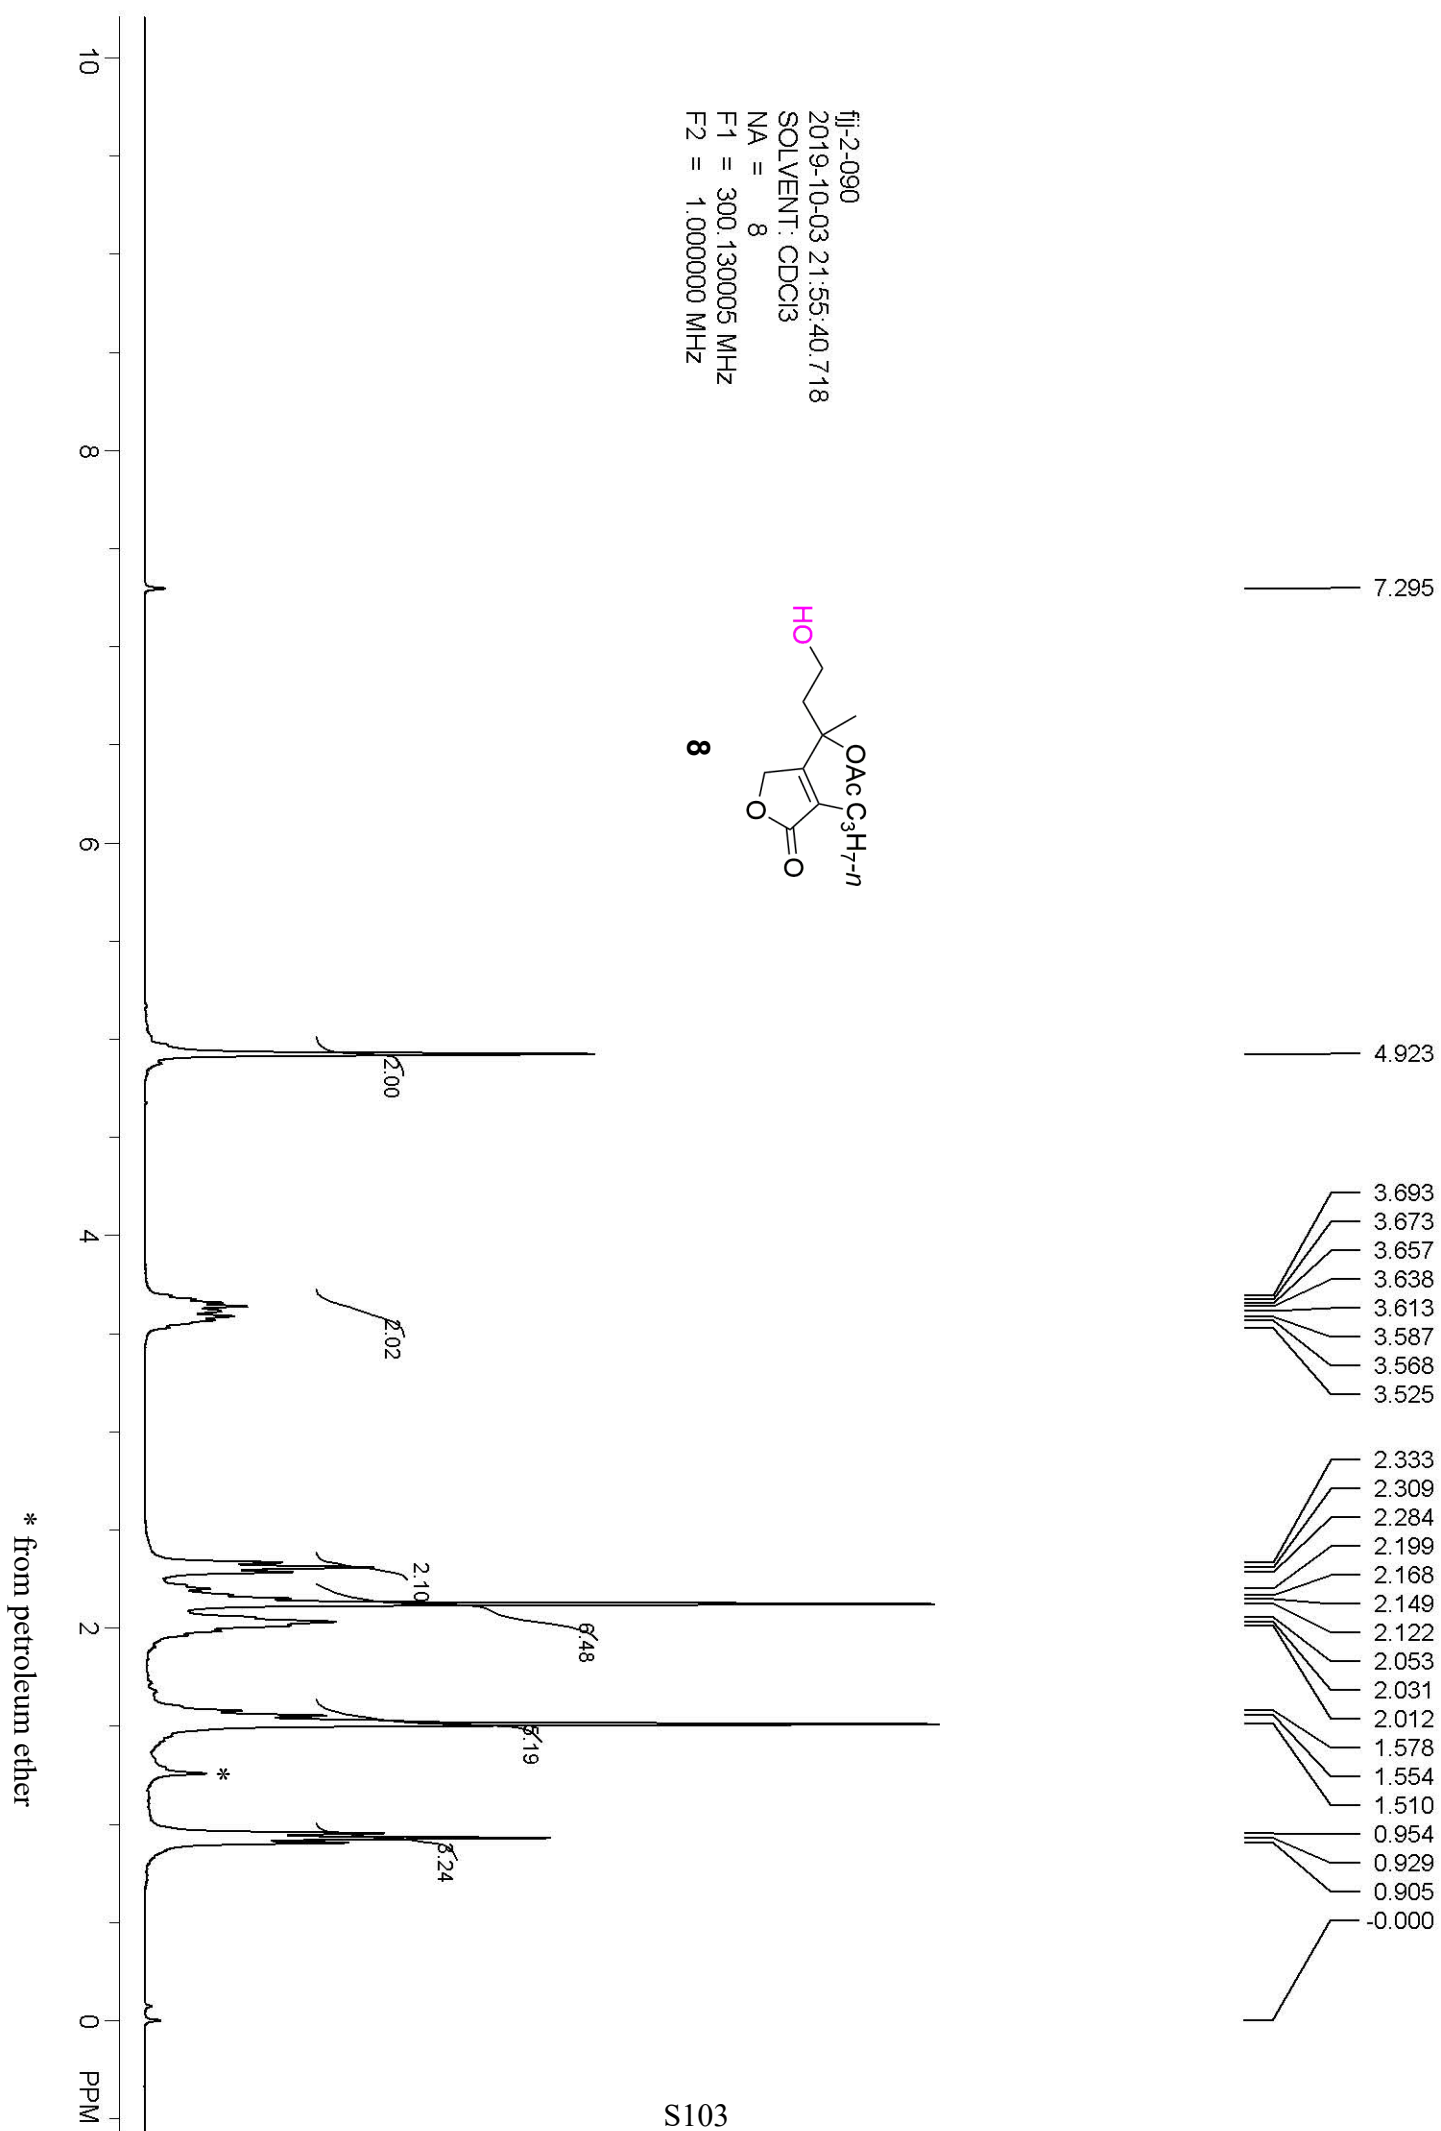

fl-2-090  
2019-10-03 22:55:59.093  
SOLVENT: CDCl3  
NA = 1000  
F1 = 75.467751 MHz  
F2 = 1.000000 MHz

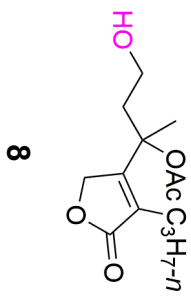

- 172.264
- 170.159
- 158.577
- 130.864
- 86.339
- 77.432
- 77.000
- 76.577
- 57.568
- 57.458
- 39.810
- 25.618
- 24.662
- 21.399
- 20.562
- 13.678

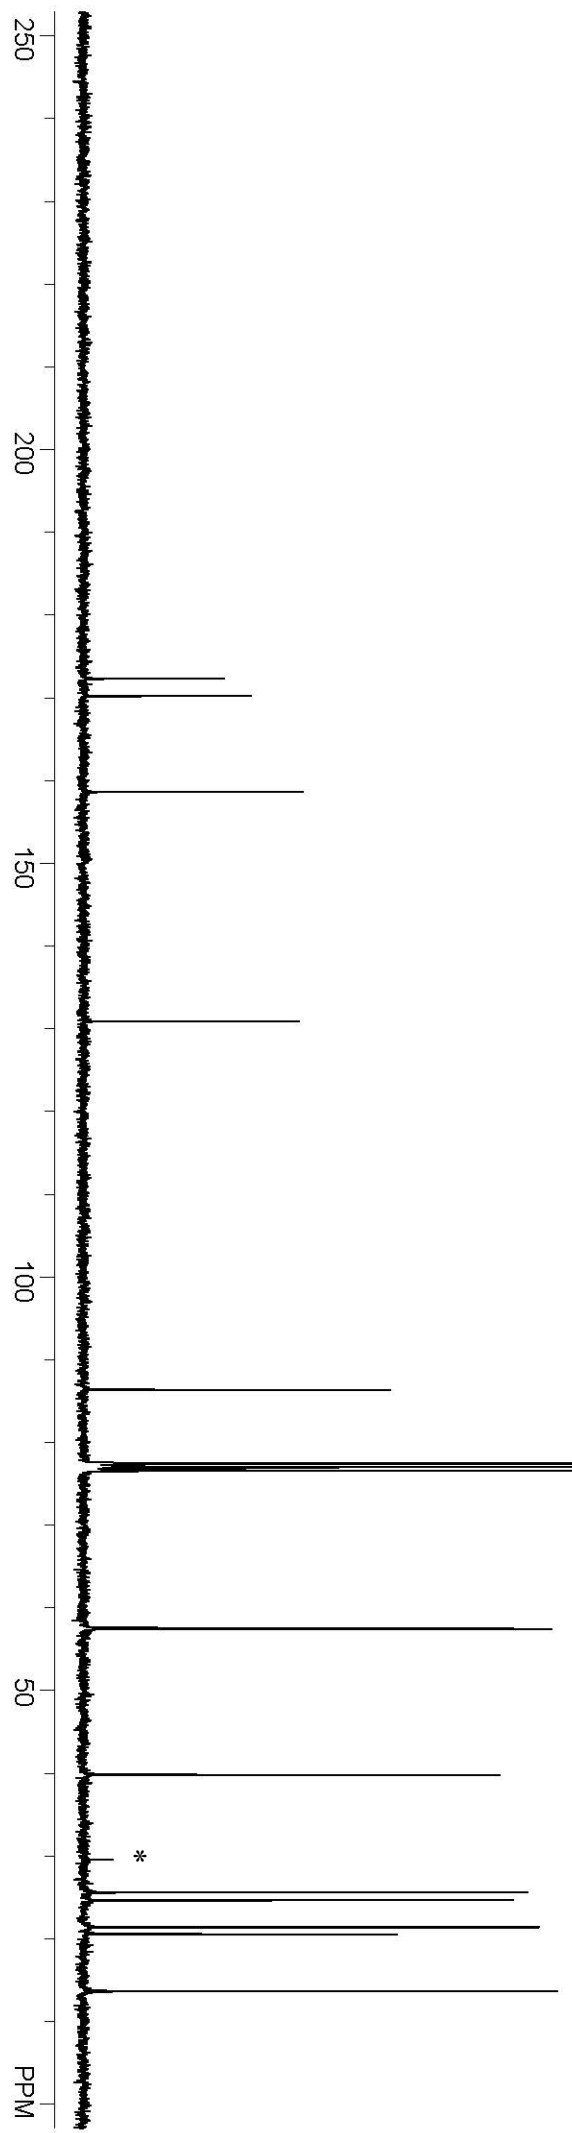



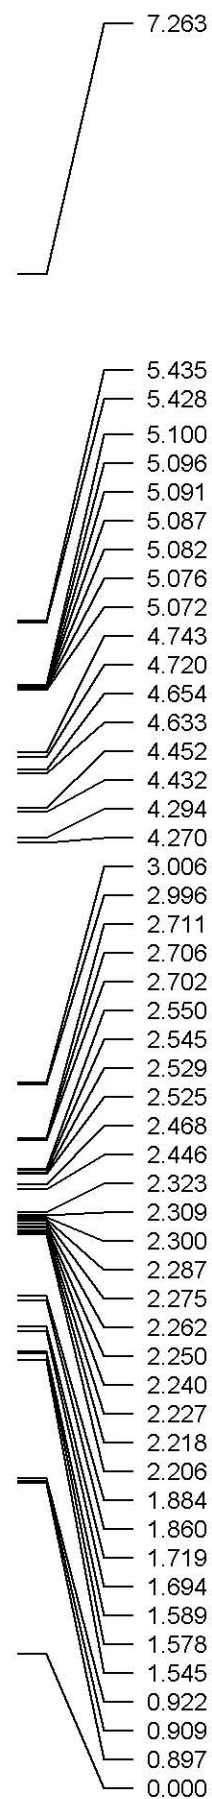

FJ-2-162 in CDCl3  
 Dec 5 2019  
 SOLVENT: cdcl3  
 NA = 1  
 F1 = 599.770264 MHz  
 F2 = 150.825745 MHz

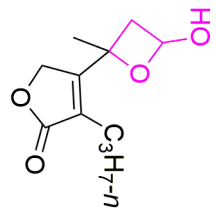

**9**, dr = 2.6/1

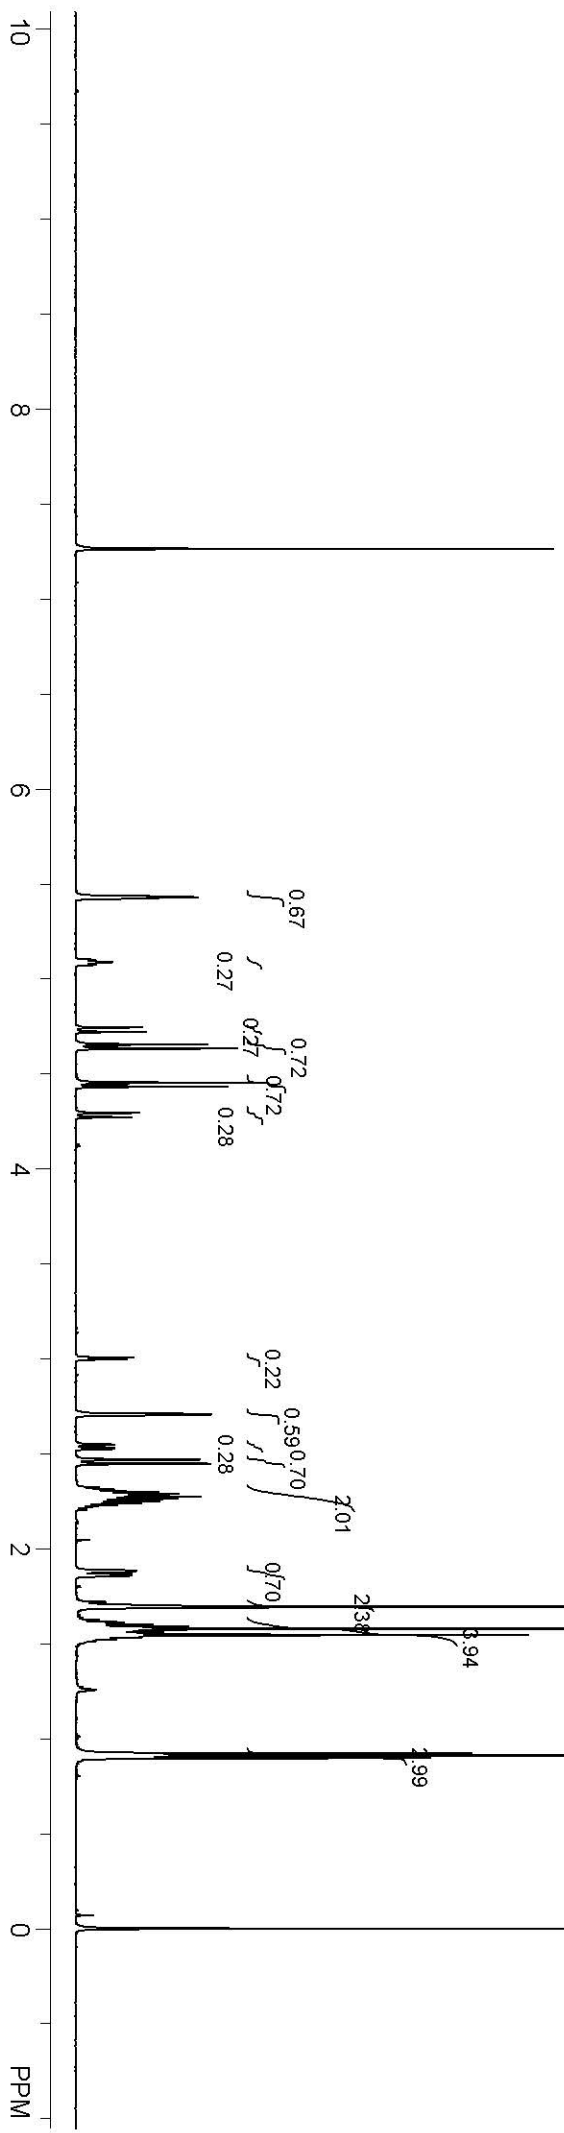

fj-2-162  
2019-12-04 22:36:33.062  
SOLVENT: CDCl3  
NA = 261  
F1 = 75.467751 MHz  
F2 = 1.000000 MHz

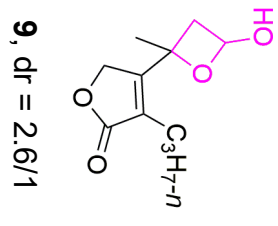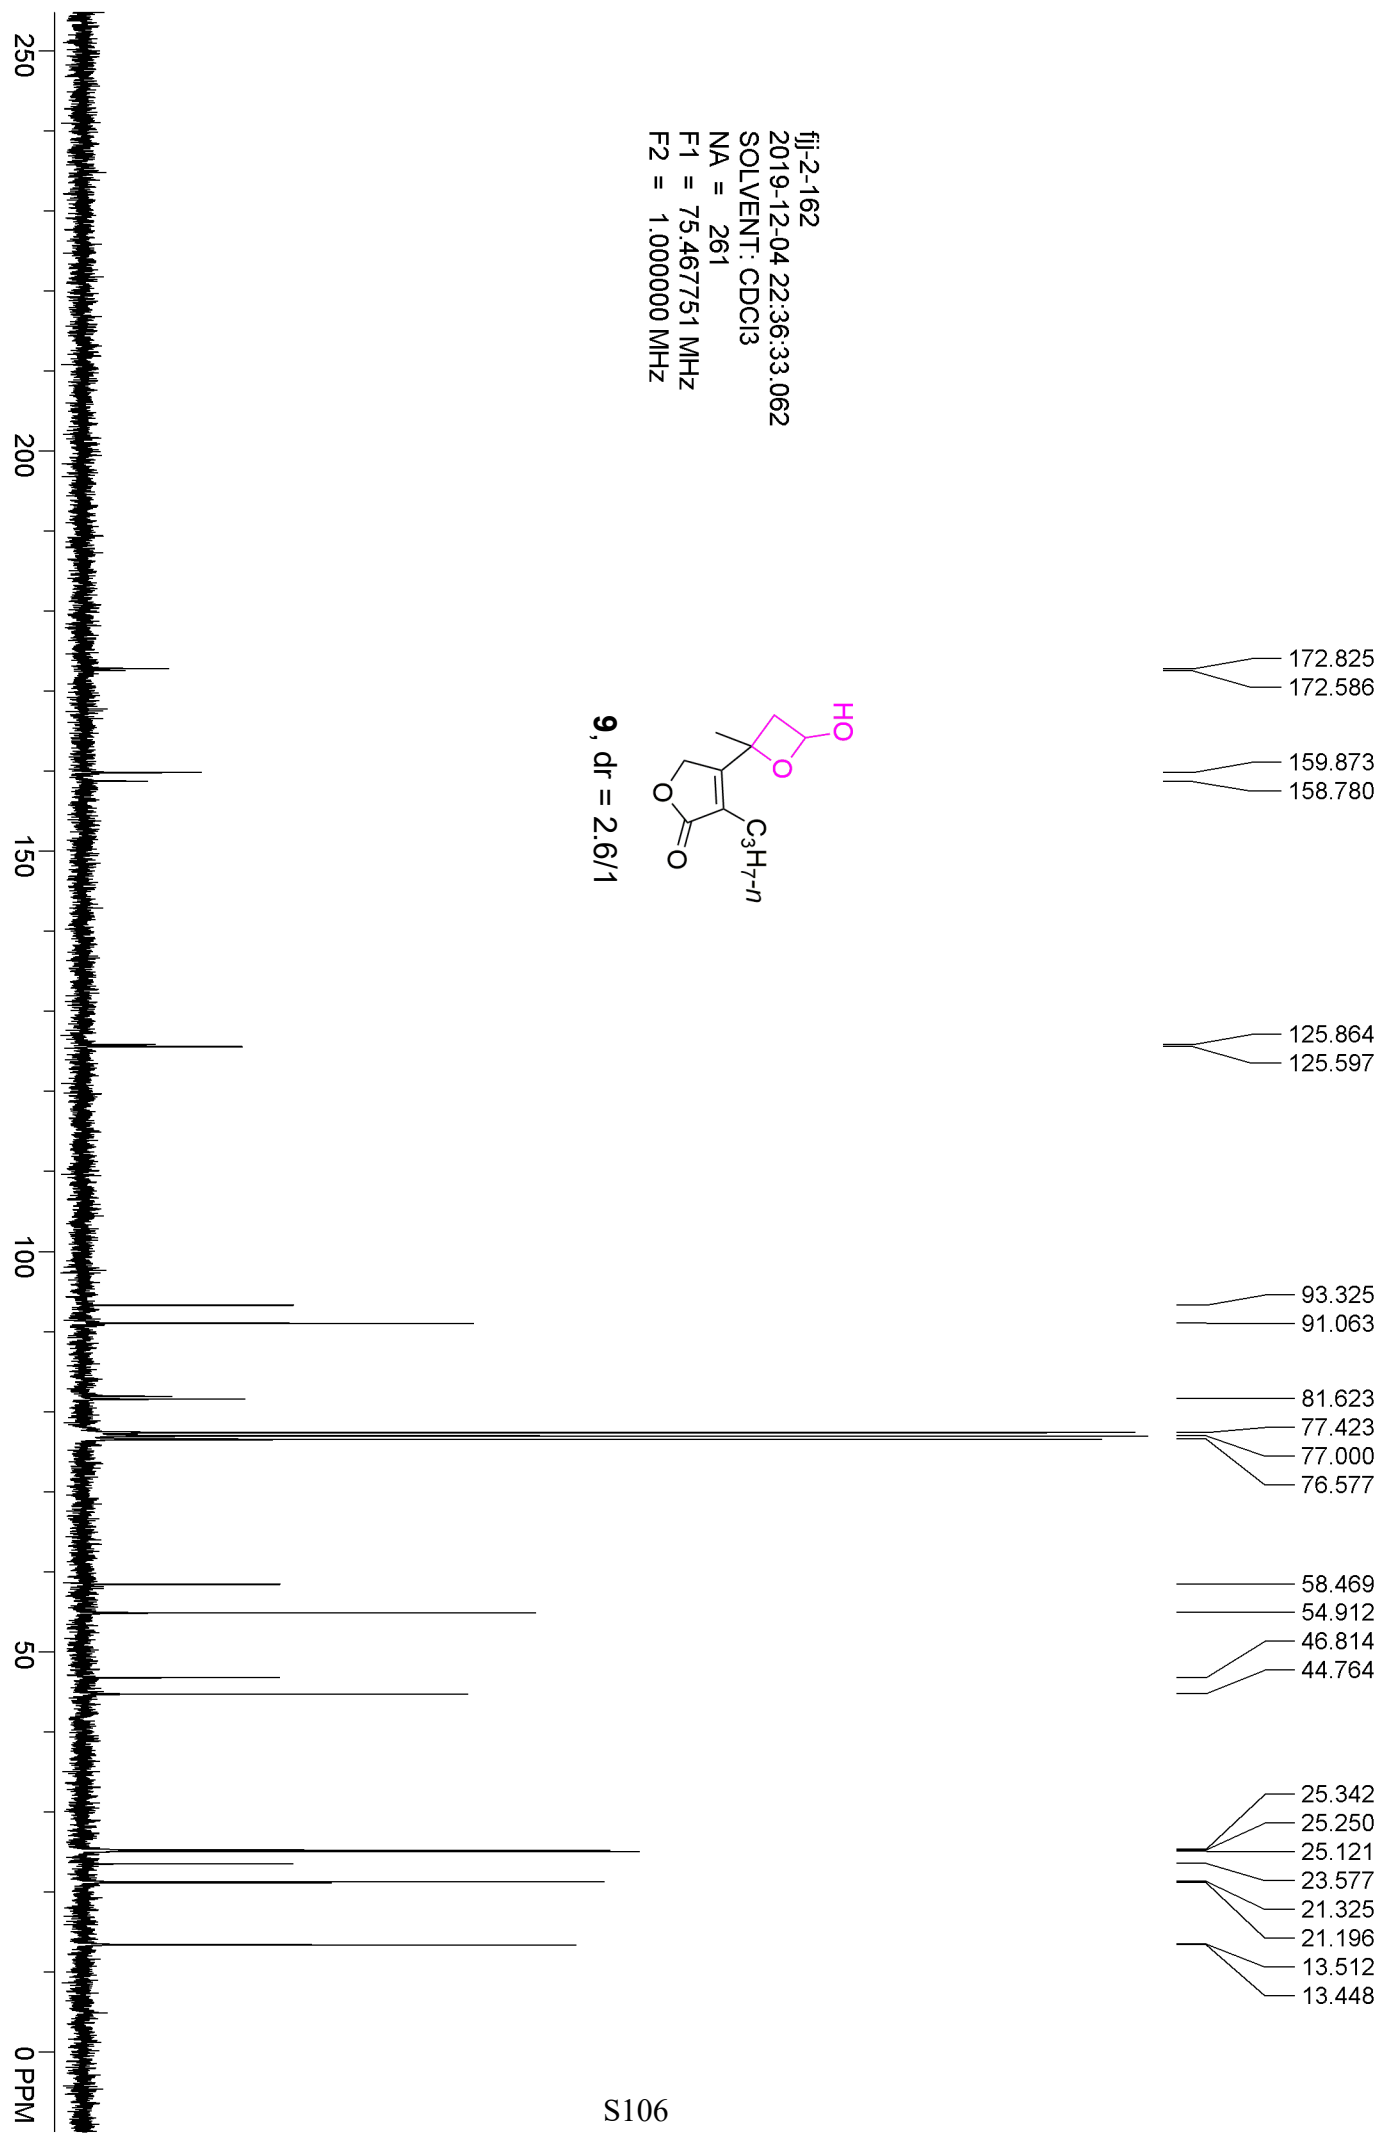

fj-2-180  
2019-12-16 20:46:18.156  
SOLVENT: CDCl3  
NA = 8  
F1 = 300.130005 MHz  
F2 = 1.000000 MHz

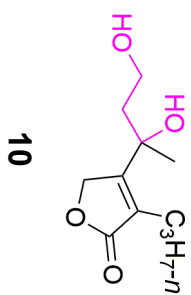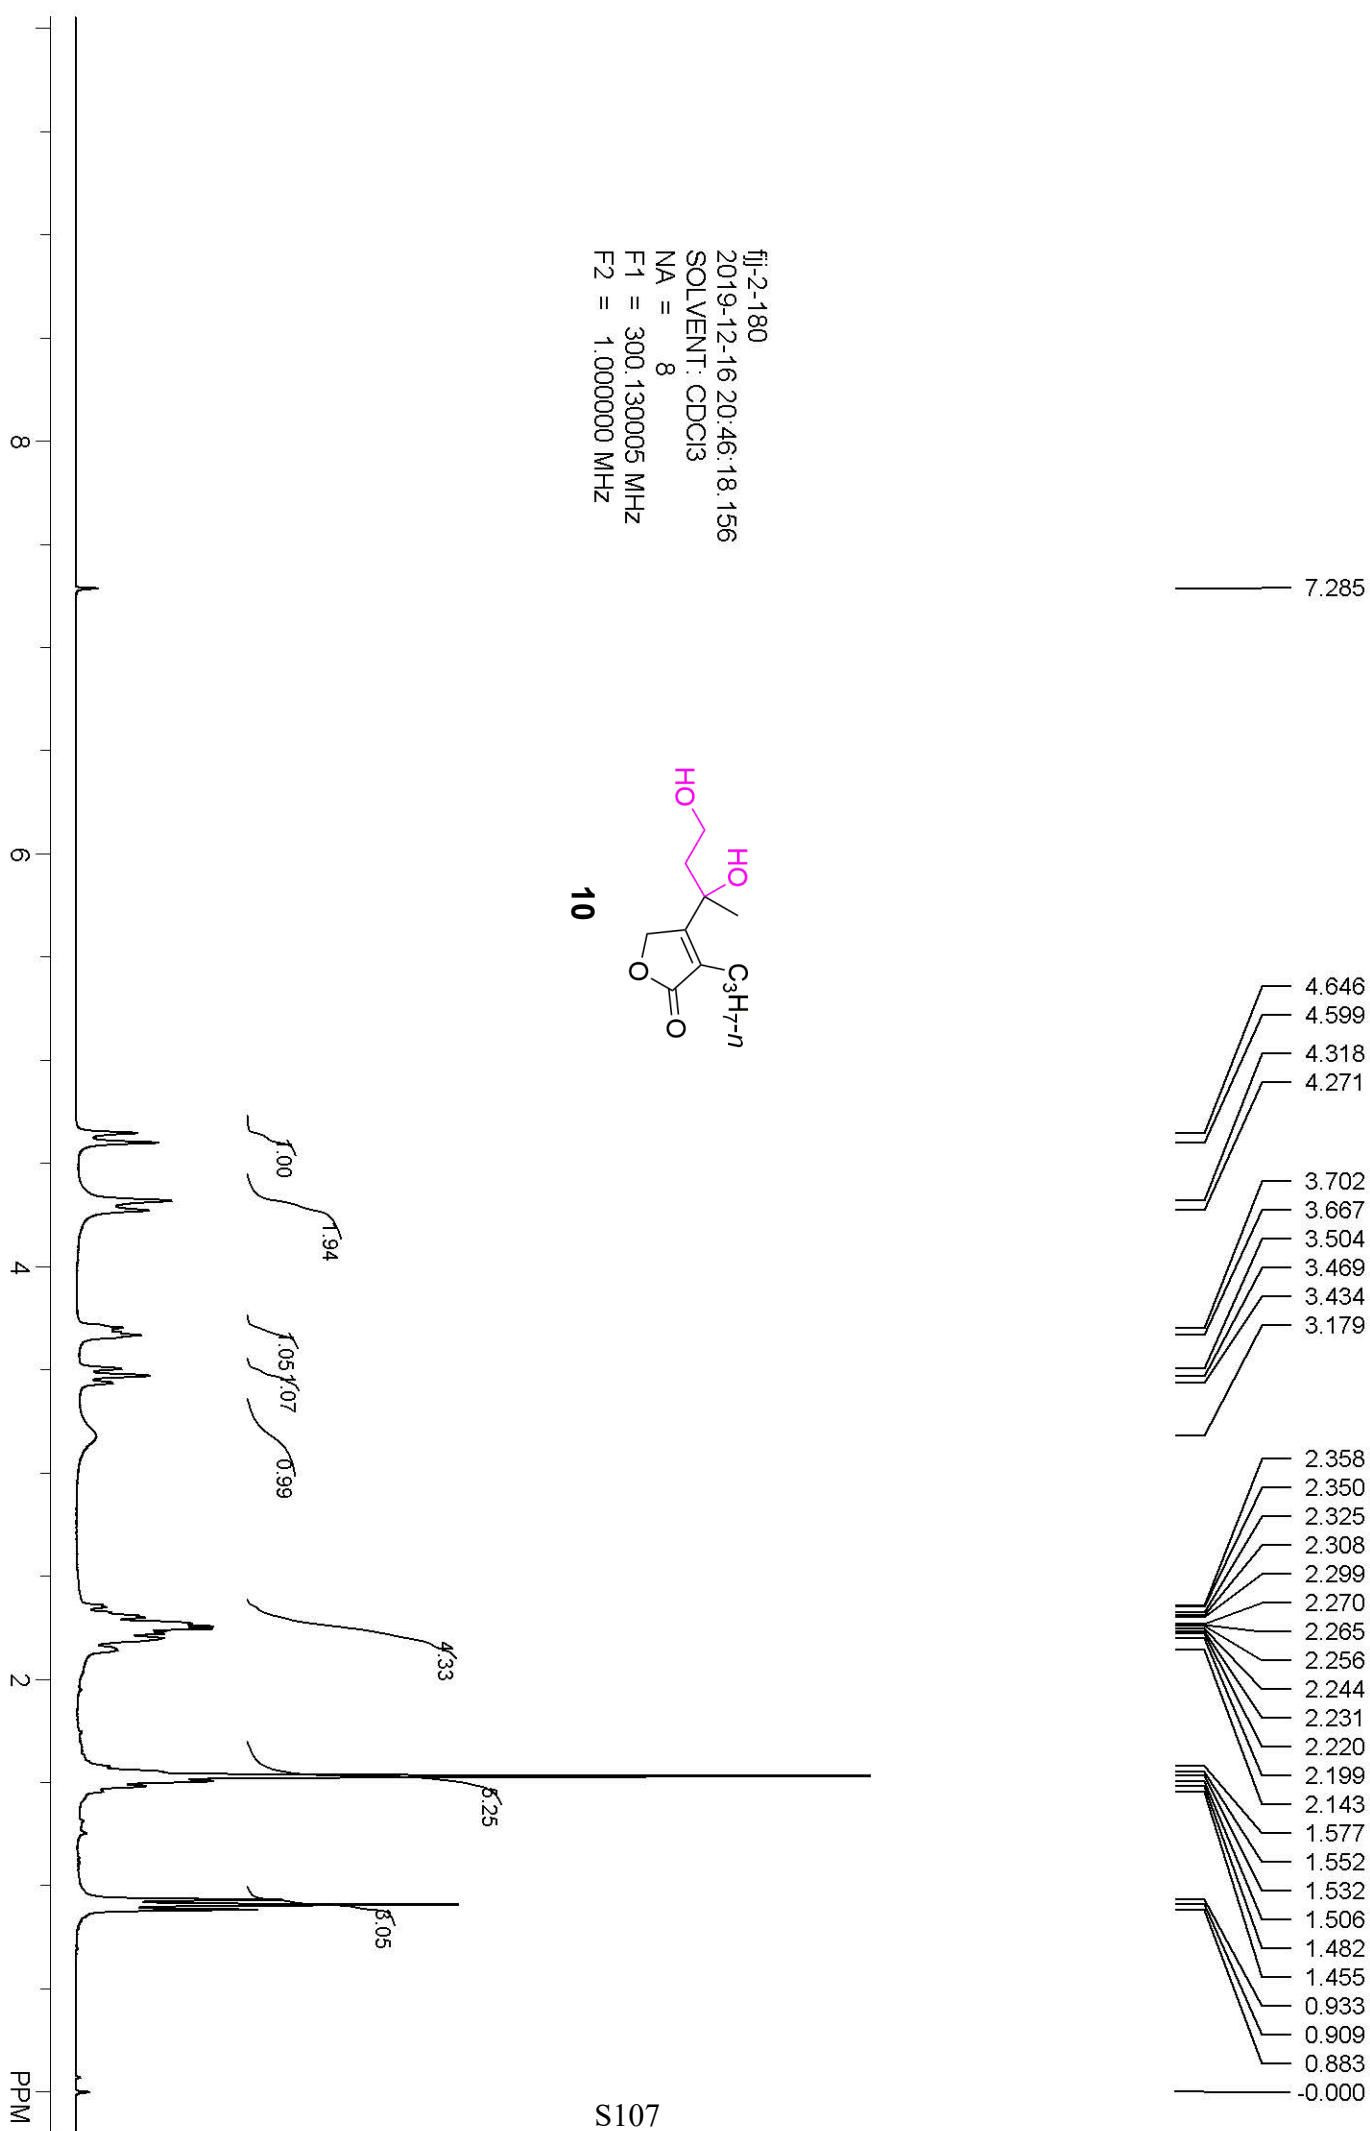

fj-2-180  
2019-12-16 21:05:23.468  
SOLVENT: CDCl3  
NA = 310  
F1 = 75.467751 MHz  
F2 = 1.000000 MHz

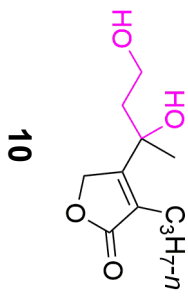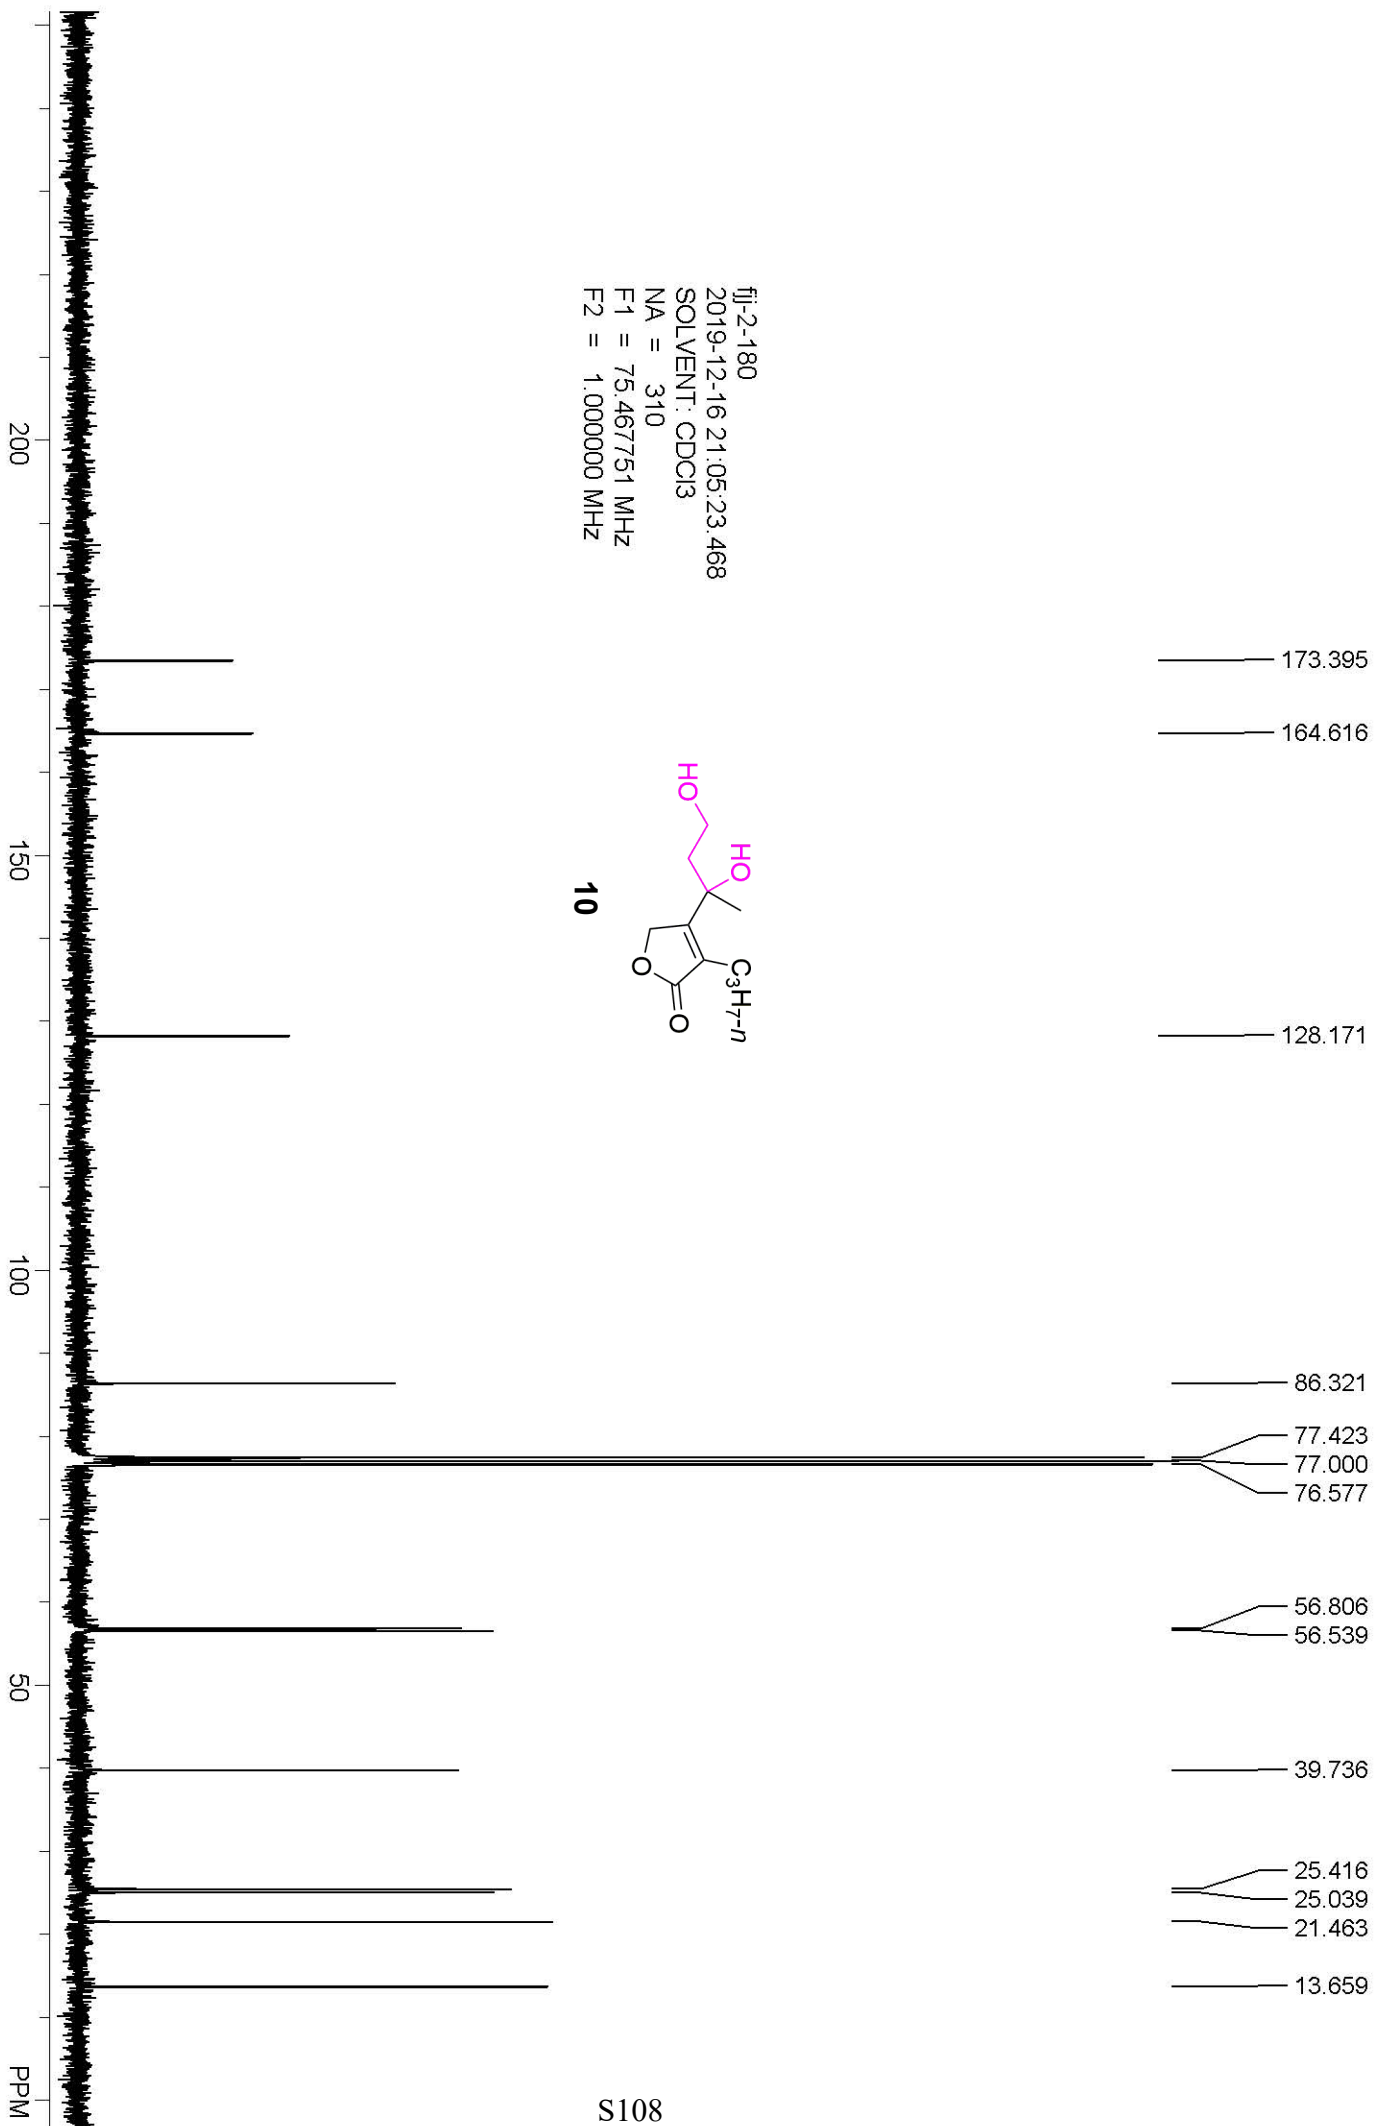

fjl-4-014  
 2020-10-26 20:48:24.078  
 SOLVENT: CDCl3  
 NA = 8  
 F1 = 300.130005 MHz  
 F2 = 1.000000 MHz

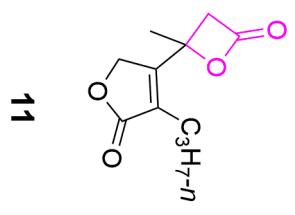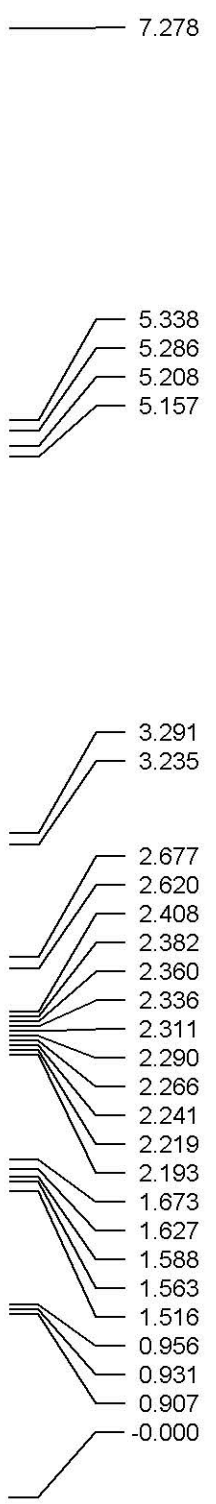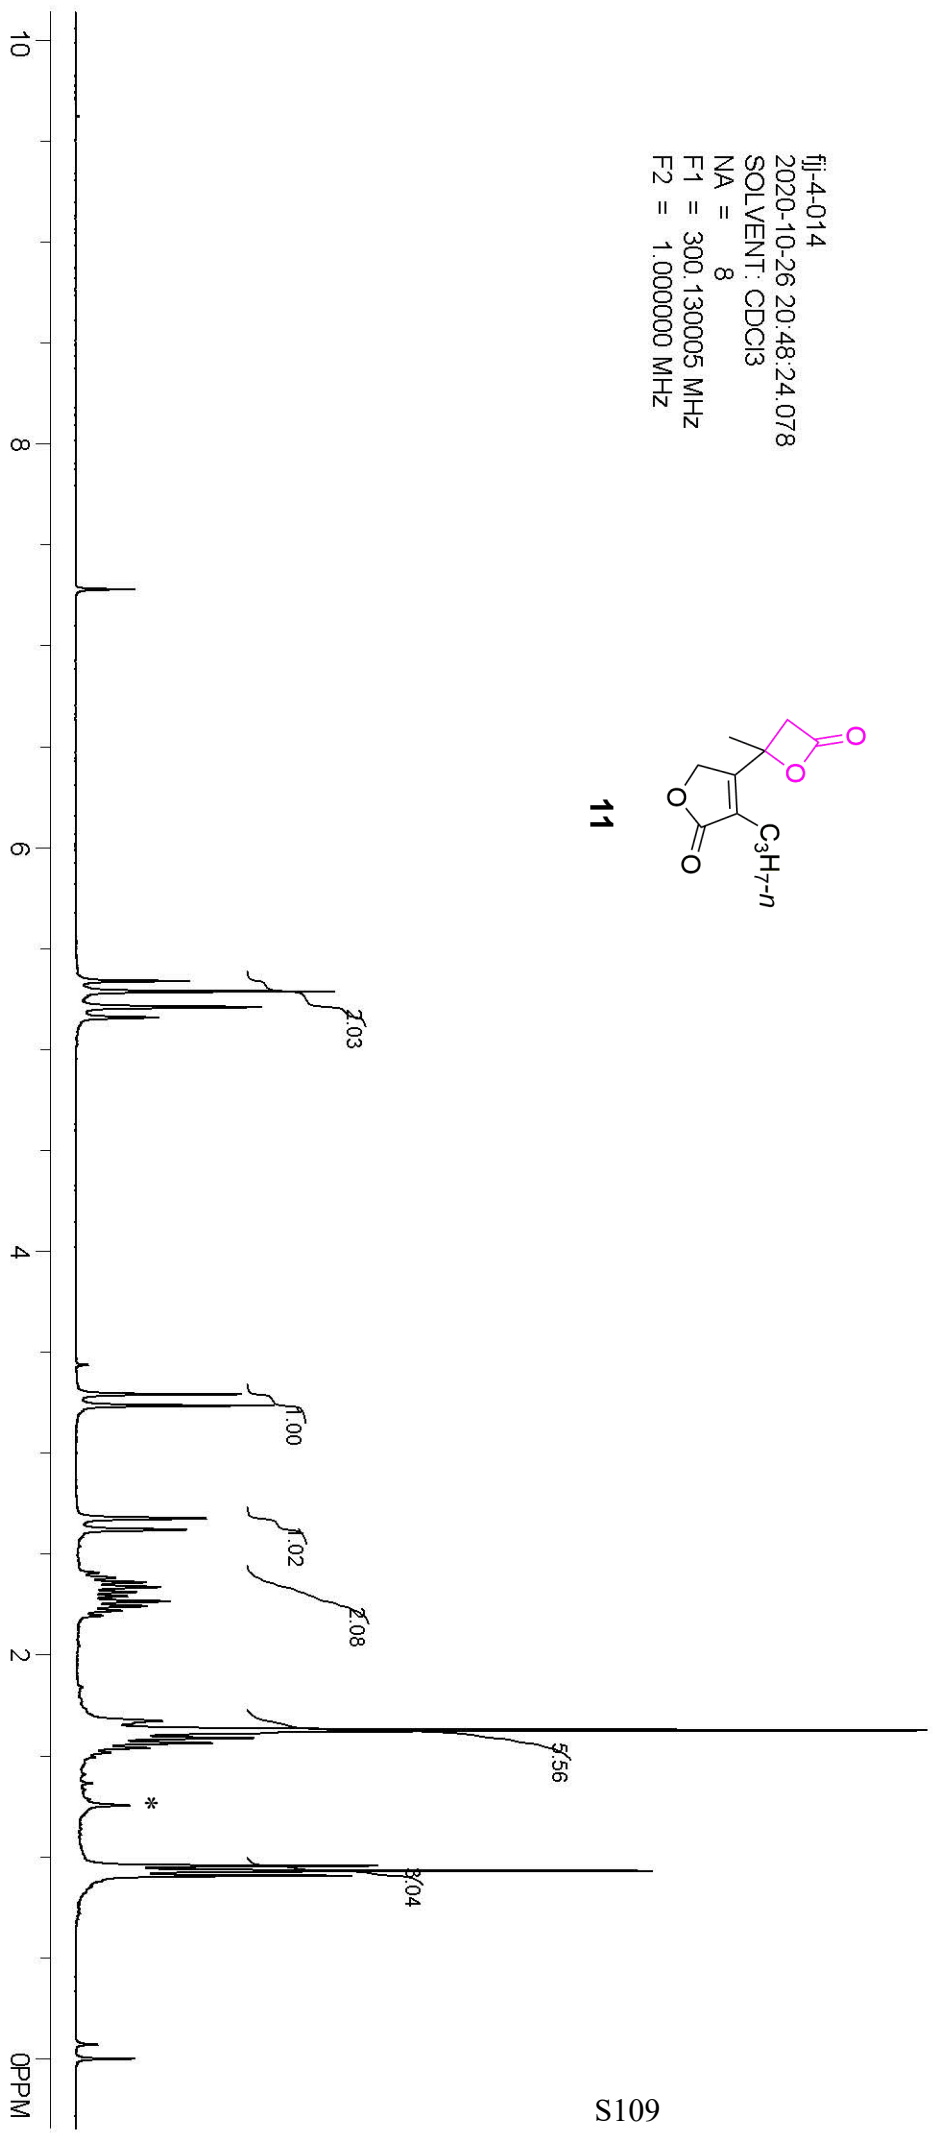

fj-4-014  
2020-10-27 08:35:27.250  
SOLVENT: CDCl3  
NA = 10526  
F1 = 75.467751 MHz  
F2 = 1.000000 MHz

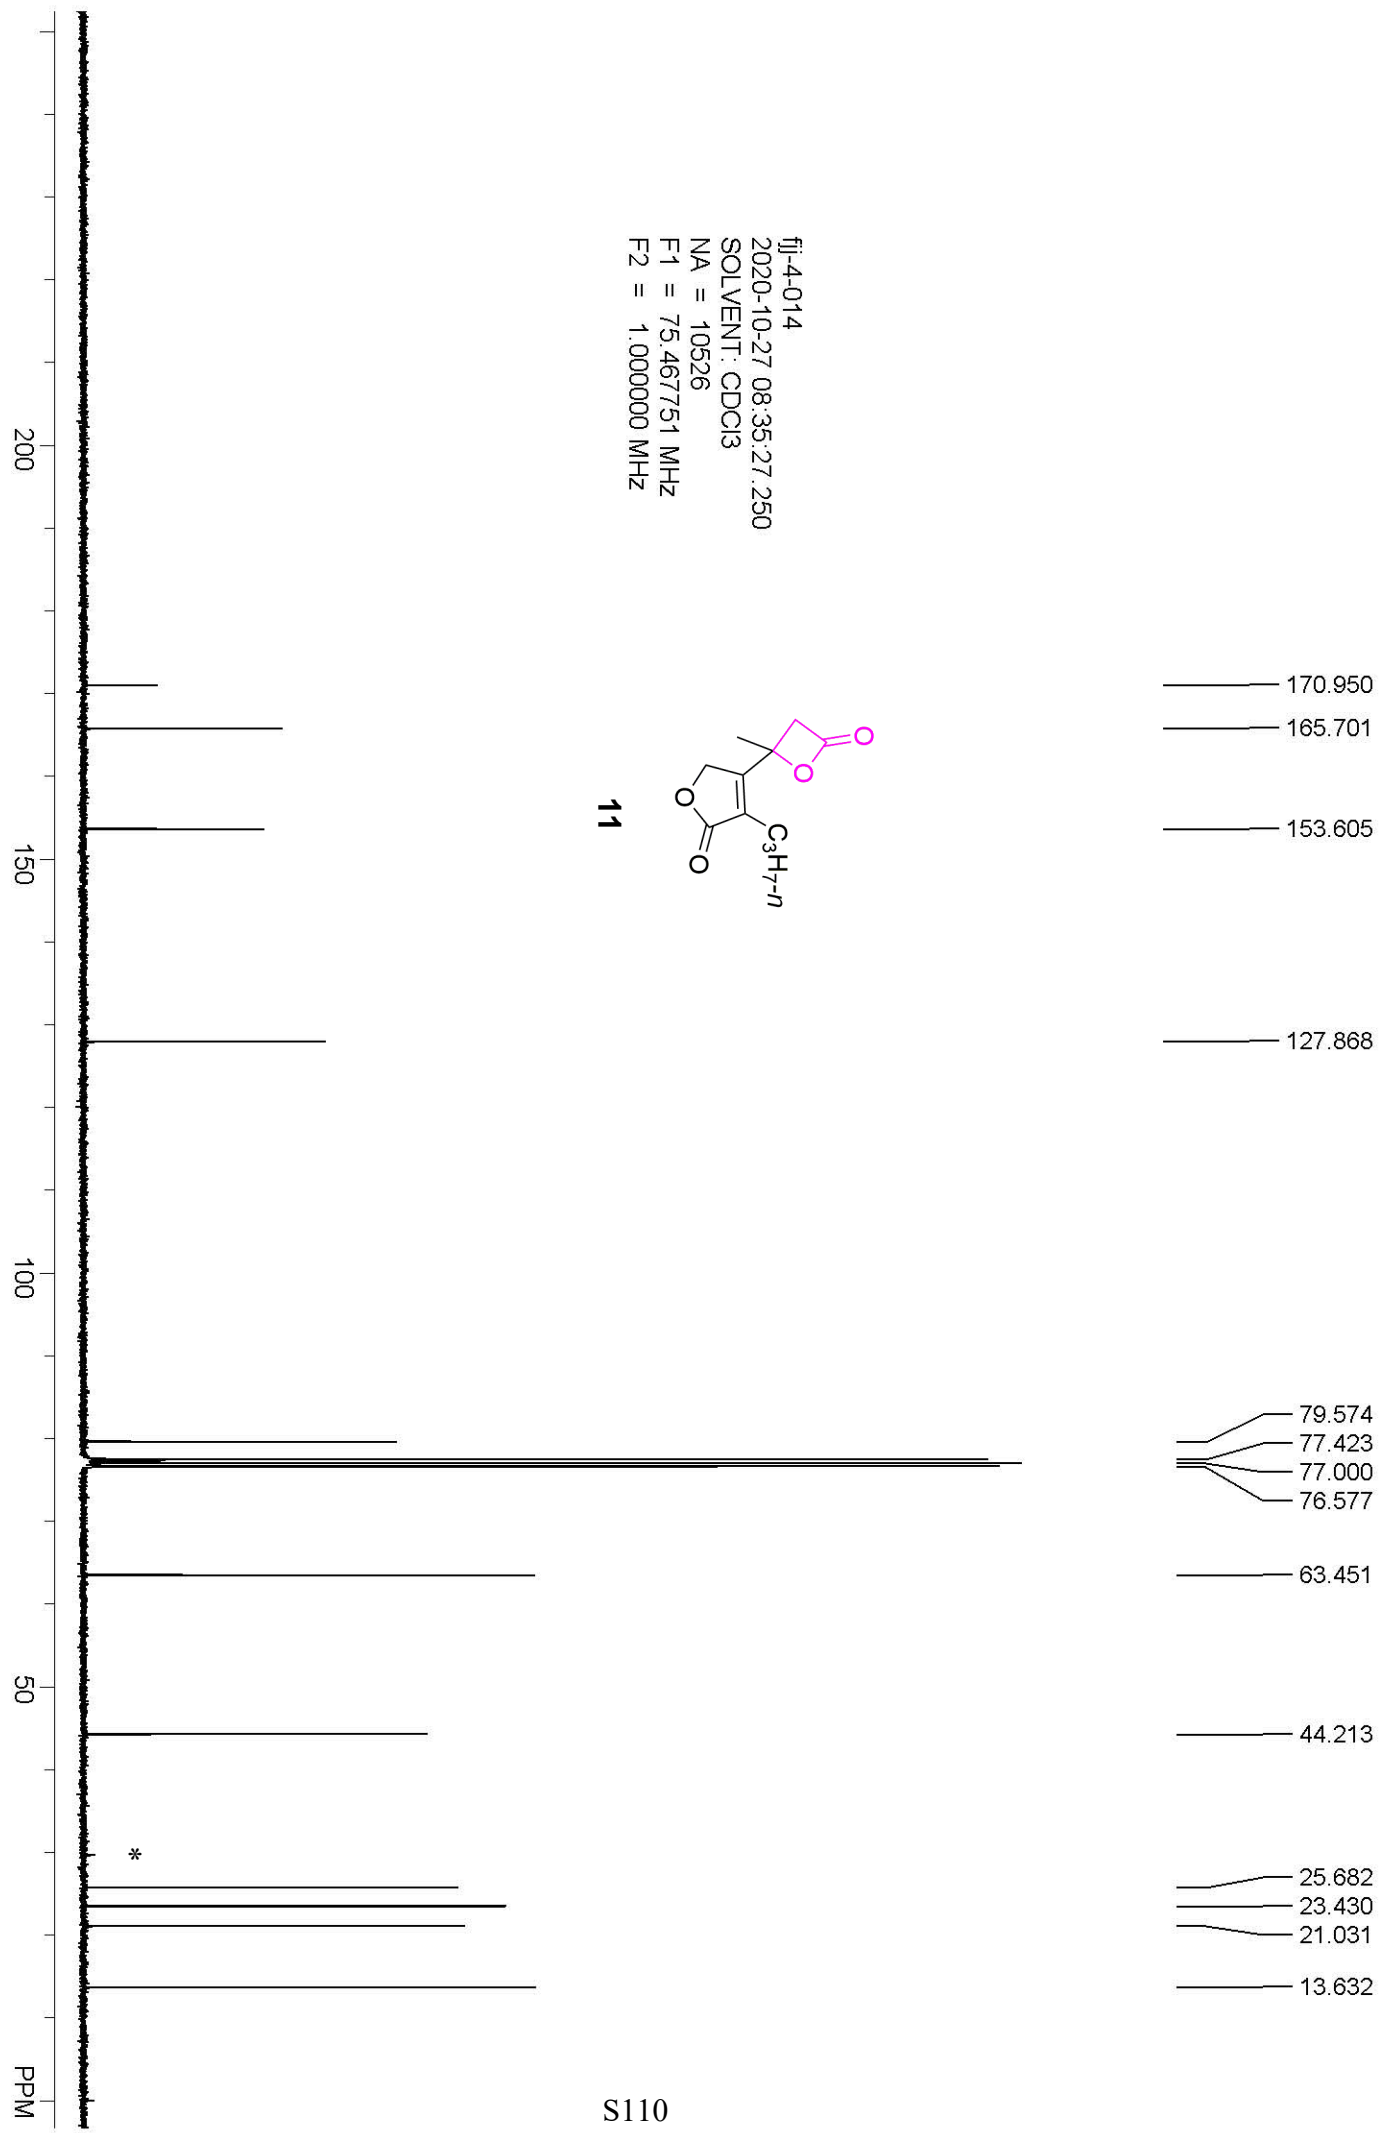

\* from petroleum ether

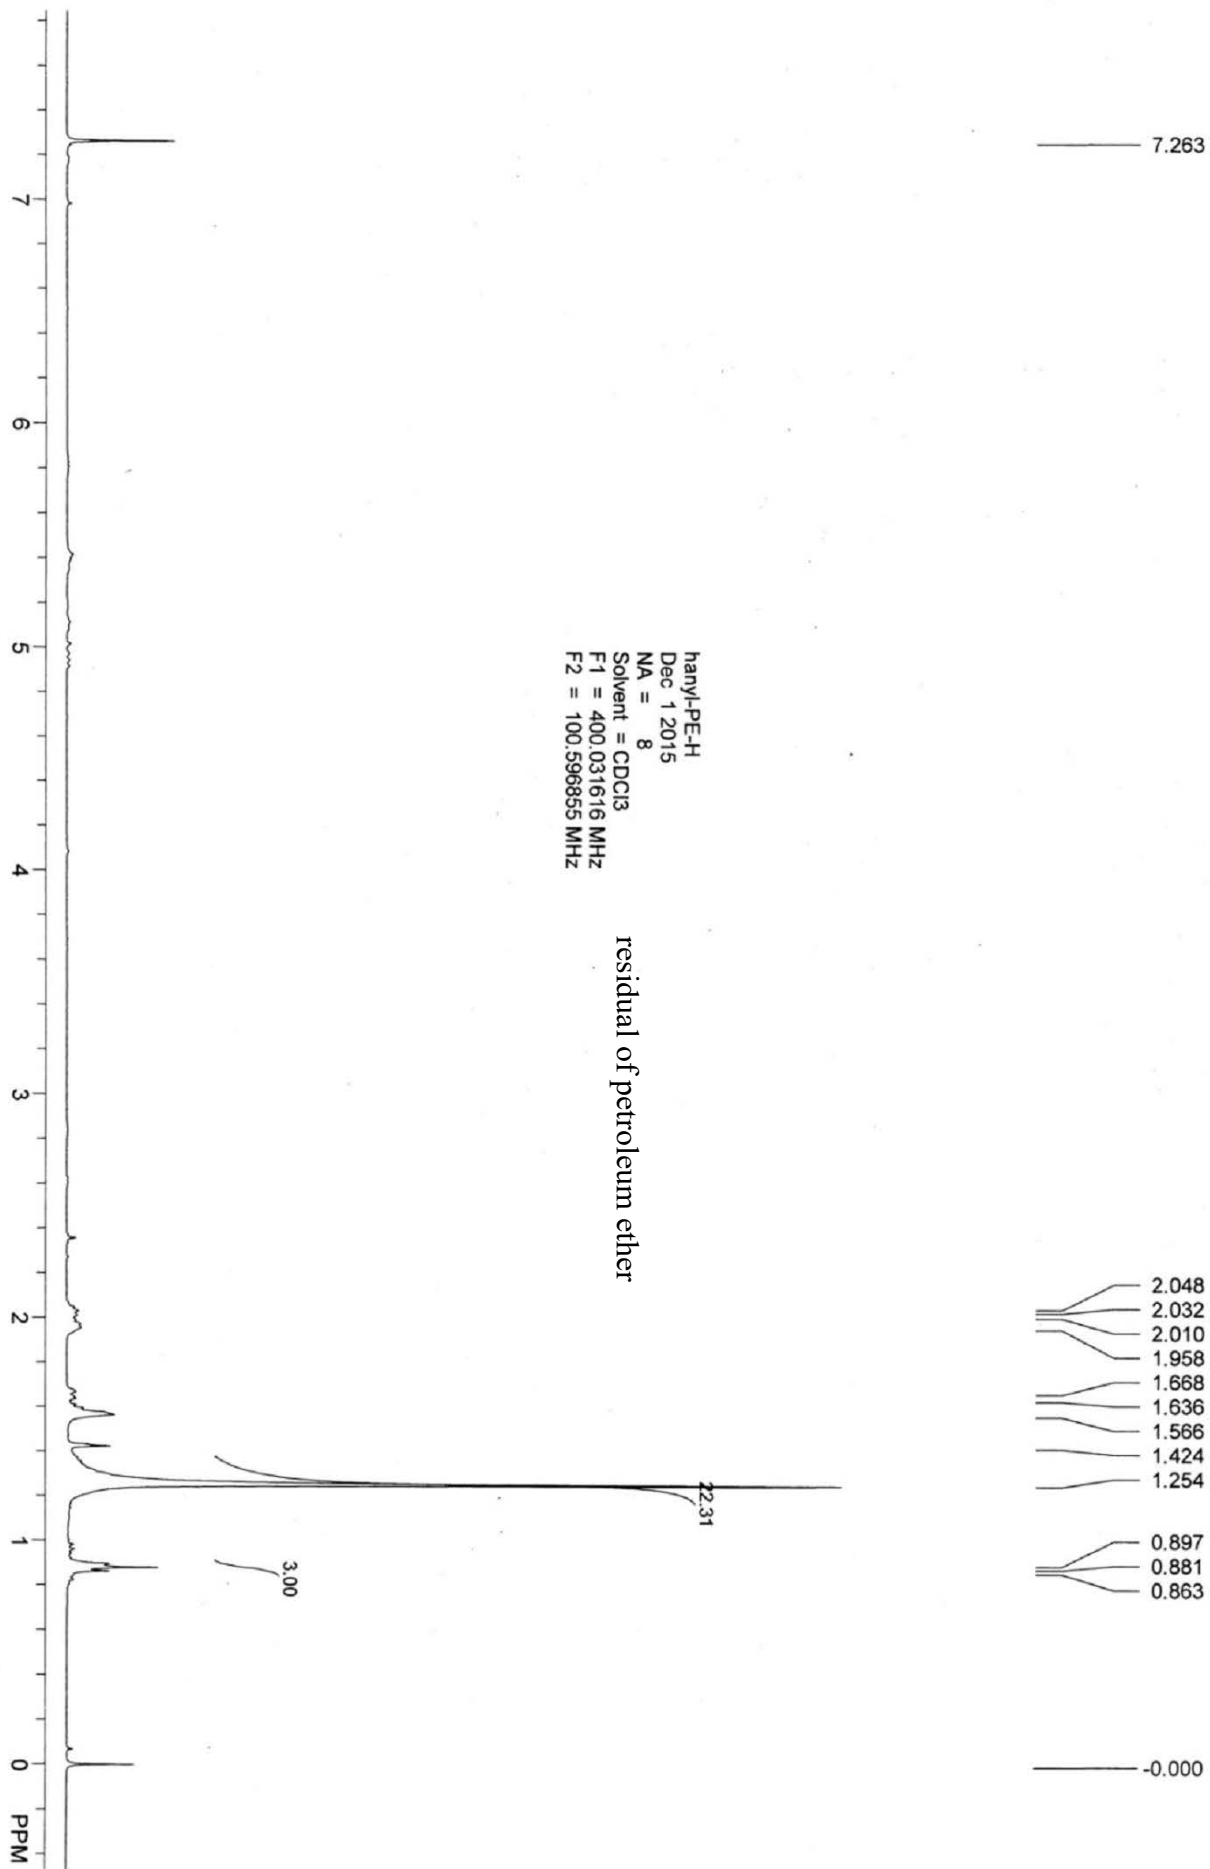

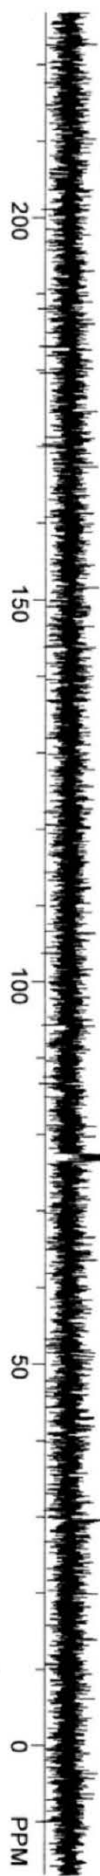

residual of petroleum ether

hany/PE-C  
Dec 1 2015  
NA = 28  
Solvent = cdcl3  
F1 = 100.597885 MHz  
F2 = 400.030792 MHz

77.316  
77.000  
76.681

29.687
